# Supplementary material for: New Autoinducing Peptides Regulate Antibiotic Production for Sculpting Microbiome
Source: Research Square preprint supplement (doi:10.21203/rs.3.rs-5906896/v1), 2025-02-13
Supplement: Supplementary file 1 [file 9a53f9dcdaf4b219824e698d.xlsx]

## Sheet: Description
Description of Additional Supplementary Files:
Supplementary Data 1: List of isolated root-associated microbes in this study and their marker sequence.
Supplementary Data 2: The information of genome and AIP BGC.
Supplementary Data 3: The sequences of AgrBs identified in this study.
Supplementary Data 4: The sequences of AgrDs identified in this study.
Supplementary Data 5: Co-occurrence relationship between agrD and BGC at genomic level.

## Sheet: Supplementary Data 1
Isolate	Medium	Marker Sequnece 27F	Family	Top-hit taxon	Similarity (%)	Average diameter		Change ratio
						WT	ΔagrD
Mb01	TSB	ATGCAGTCGAACGGTGAACACGGAGCTTGCTCTGTGGGATCAGTGGCGAACGGGTGAGTAACACGTGAGCAACCTGCCCCTGACTCTGGGATAAGCGCTGGAAACGGCGTCTAATACTGGATATGTGACGTGACCGCATGGTCTGCGTTTGGAAAGATTTTTCGGTTGGGGATGGGCTCGCGGCCTATCAGCTTGTTGGTGAGGTAATGGCTCACCAAGGCGTCGACGGGTAGCCGGCCTGAGAGGGTGACCGGCCACACTGGGACTGAGACACGGCCCAGACTCCTACGGGAGGCAGCAGTGGGGAATATTGCACAATGGGCGGAAGCCTGATGCAGCAACGCCGCGTGAGGGATGACGGCCTTCGGGTTGTAAACCTCTTTTAGCAGGGAAGAAGCG…	Microbacteriaceae	Microbacterium paraoxydans	99.88	16.05	11.725	-0.466327
Mb02	TSB	CGGAGCTTGCTCTGTGGGATCAGTGGCGAACGGGTGAGTAACACGTGAGCAACCTGCCCCTGACTCTGGGATAAGCGCTGGAAACGGCGTCTAATACTGGATATGTGACGTGACCGCATGGTCTGCGTTTGGAAAGATTTTTCGGTTGGGGATGGGCTCGCGGCCTATCAGCTTGTTGGTGAGGTAATGGCTCACCAAGGCGTCGACGGGTAGCCGGCCTGAGAGGGTGACCGGCCACACTGGGACTGAGACACGGCCCAGACTCCTACGGGAGGCAGCAGTGGGGAATATTGCACAATGGGCGGAAGCCTGATGCAGCAACGCCGCGTGAGGGATGACGGCCTTCGGGTTGTAAACCTCTTTTAGCAGGGAAGAAGCGAAAGTGACGGTACCTGCAGA…	Microbacteriaceae	Microbacterium paraoxydans	99.75	12.625	9.05	-0.486152
Mb03	TSB	CAGTCGAACGGTGAACACGGAGCTTGCTCTGTGGGATCAGTGGCGAACGGGTGAGTAACACGTGAGCAACCTGCCCCTGACTCTGGGATAAGCGCTGGAAACGGCGTCTAATACTGGATACGAGTAGCGGCCGCATGGTCAGTTACTGGAAAGATTTTTTGGTTGGGGATGGGCTCGCGGCCTATCAGCTTGTTGGTGAGGTAATGGCTCACCAAGGCGTCGACGGGTAGCCGGCCTGAGAGGGTGACCGGCCACACTGGGACTGAGACACGGCCCAGACTCCTACGGGAGGCAGCAGTGGGGAATATTGCACAATGGGCGGAAGCCTGATGCAGCAACGCCGCGTGAGGGATGACGGCCTTCGGGTTGTAAACCTCTTTTAGCAGGGAAGAAGCGAAA…	Microbacteriaceae	Microbacterium foliorum	99.13	15.0333	9.5	-0.600666
Mb04	ISP1	GAACCAGGTGCTTGCACTTGGGGATTAGTGGCGAACGGGTGAGTAACACGTGAGCAACCTGCCCCTCACTCTGGGATAAGCGCTGGAAACGGCGTCTAATACTGGATACGAGTCGCAACCGCATGGTTAGTGACTGGAAAGATTTTTTGGTGGGGGATGGGCTCGCGGCCTATCAGCTTGTTGGTGAGGTAATGGCTCACCAAGGCGTCGACGGGTAGCCGGCCTGAGAGGGTGACCGGCCACACTGGGACTGAGACACGGCCCAGACTCCTACGGGAGGCAGCAGTGGGGAATATTGCACAATGGGCGGAAGCCTGATGCAGCAACGCCGCGTGAGGGATGACGGCCTTCGGGTTGTAAACCTCTTTTAGCAGGGAAGAAGCGAAAGTGACGGTACCT…	Microbacteriaceae	Microbacterium azadirachtae	98.75	14.75	13.25	-0.193048
Mb05	TSB	AACGGTGAACACGGAGCTTGCTCTGTGGGATCAGTGGCGAACGGGTGAGTAACACGTGAGCAACCTGCCCCTGACTCTGGGATAAGCGCTGGAAACGGCGTCTAATACTGGATACGAACCACGAAGGCATCTTCAGTGGTTGGAAAGAATTTCGGTTGGGGATGGGCTCGCGGCCTATCAGCTTGTTGGTGAGGTAATGGCTCACCAAGGCGTCGACGGGTAGCCGGCCTGAGAGGGTGACCGGCCACACTGGGACTGAGACACGGCCCAGACTCCTACGGGAGGCAGCAGTGGGGAATATTGCACAATGGGCGCAAGCCTGATGCAGCAACGCCGCGTGAGGGATGACGGCCTTCGGGTTGTAAACCTCTTTTAGCAGGGAAGAAGCGAAAGTGACGG…	Microbacteriaceae	Microbacterium hydrocarbonoxydans	99.38	9.5	8.6	-0.180499
Mb06	TSB	TCGAACGGTGAACACGGAGCTTGCTCTGTGGGATCAGTGGCGAACGGGTGAGTAACACGTGAGCAACCTGCCCCTGACTCTGGGATAAGCGCTGGAAACGGCGTCTAATACTGGATACGAACCACGAAGGCATCTTCAGTGGTTGGAAAGAATTTCGGTTGGGGATGGGCTCGCGGCCTATCAGCTTGTTGGTGAGGTAATGGCTCACCAAGGCGTCGACGGGTAGCCGGCCTGAGAGGGTGACCGGCCACACTGGGACTGAGACACGGCCCAGACTCCTACGGGAGGCAGCAGTGGGGAATATTGCACAATGGGCGCAAGCCTGATGCAGCAACGCCGCGTGAGGGATGACGGCCTTCGGGTTGTAAACCTCTTTTAGCAGGGAAGAAGCGAAAGTGA…	Microbacteriaceae	Microbacterium hydrocarbonoxydans	99.37	15.3833	10.8333	-0.504067
Mb07	TSB	TCGAACGGTGAAGCCAAGCTTGCTTGGTGGATCAGTGGCGAACGGGTGAGTAACACGTGAGCAACCTGCCCTGGACTCTGGGATAAGCGCTGGAAACGGCGTCTAATACTGGATATGAGCCTCTTCCGCATGGTGGGGGTTGGAAAGATTTTTCGGTCTGGGATGGGCTCGCGGCCTATCAGCTTGTTGGTGAGGTAATGGCTCACCAAGGCGTCGACGGGTAGCCGGCCTGAGAGGGTGACCGGCCACACTGGGACTGAGACACGGCCCAGACTCCTACGGGAGGCAGCAGTGGGGAATATTGCACAATGGGCGGAAGCCTGATGCAGCAACGCCGCGTGAGGGATGACGGCCTTCGGGTTGTAAACCTCTTTTAGCAAGGAAGAAGCGAAAGTGACG…	Microbacteriaceae	Microbacterium trichothecenolyticum	99.13	25.7	15.7	-0.626807
Mb08	ISP1	AGTCGAACGATGAACTCCAGCTTGCTGGGGGGATTAGTGGCGAACGGGTGAGTAACACGTGAGCAACCTGCCCTGGACTCTGGGATAAGCGCTGGAAACGGTGTCTAATACTGGATATGAGCTTTCACCGCATGGTGGGGGTTGGAAAGATTTTTCGGTCTGGGATGGGCTCGCGGCCTATCAGCTTGTTGGTGAGGTAATGGCTCACCAAGGCGTCGACGGGTAGCCGGCCTGAGAGGGTGACCGGCCACACTGGGACTGAGACACGGCCCAGACTCCTACGGGAGGCAGCAGTGGGGAATATTGCACAATGGGCGGAAGCCTGATGCAGCAACGCCGCGTGAGGGATGACGGCCTTCGGGTTGTAAACCTCTTTTAGCAGGGAAGAAGCGTGAGTGA…	Microbacteriaceae	Microbacterium jejuense	99	22.4143	23.6429	0.112628
Mb09	R2A	TCGAACGATGAACTCCAGCTTGCTGGGGGGATTAGTGGCGAACGGGTGAGTAACACGTGAGCAACCTGCCCTGGACTCTGGGATAAGCGCTGGAAACGGTGTCTAATACTGGATATGAGCTTTCACCGCATGGTGGGGGTTGGAAAGATTTTTCGGTCTGGGATGGGCTCGCGGCCTATCAGCTTGTTGGTGAGGTAATGGCTCACCAAGGCGTCGACGGGTAGCCGGCCTGAGAGGGTGACCGGCCACACTGGGACTGAGACACGGCCCAGACTCCTACGGGAGGCAGCAGTGGGGAATATTGCACAATGGGCGGAAGCCTGATGCAGCAACGCCGCGTGAGGGATGACGGCCTTCGGGTTGTAAACCTCTTTTAGCAGGGAAGAAGCGTGAGTGACG…	Microbacteriaceae	Microbacterium jejuense	99	21.96	16.4	-0.442271
Mb10	ISP1	CGAACGATGAACCTGGAGCTTGCTCCGGGGGATTAGTGGCGAACGGGTGAGTAACACGTGAGTAACCTGCCCTTGACTCTGGGATAACCTCCGGAAACGGAAGCTAATACCGGATATGACGCACGGAGGCATCTCCTGTGCGTGGAAAGAATTTCGGTCAAGGATGGACTCGCGGCCTATCAGGTAGTTGGTGAGGTAACGGCCCACCAAGCCTACGACGGGTAGCCGGCCTGAGAGGGTGACCGGCCACACTGGGACTGAGACACGGCCCAGACTCCTACGGGAGGCAGCAGTGGGGAATATTGCACAATGGGCGCAAGCCTGATGCAGCAACGCCGCGTGAGGGATGACGGCCTTCGGGTTGTAAACCTCTTTTAGTAGGGAAGAAGCGAAAGTGAC…	Microbacteriaceae	Leifsonia soli	99.49	18.85	18	-0.0881523
Mb11	TSB	CATGCAAGTCGAACGATGAACCTGGAGCTTGCTCCGGGGGATTAGTGGCGAACGGGTGAGTAACACGTGAGTAACCTGCCCTTGACTCTGGGATAACCTCCGGAAACGGAAGCTAATACCGGATATGACGCACGGAGGCATCTCCTGTGCGTGGAAAGAATTTCGGTCAAGGATGGACTCGCGGCCTATCAGGTAGTTGGTGAGGTAACGGCCCACCAAGCCTACGACGGGTAGCCGGCCTGAGAGGGTGACCGGCCACACTGGGACTGAGACACGGCCCAGACTCCTACGGGAGGCAGCAGTGGGGAATATTGCACAATGGGCGCAAGCCTGATGCAGCAACGCCGCGTGAGGGATGACGGCCTTCGGGTTGTAAACCTCTTTTAGTAGGGAAGAAGC…	Microbacteriaceae	Leifsonia soli	99.48	18.9167	11.9167	-0.603156
Cm01	R2A	ATGGCCAGCTTGCTGGTCTGATCAGTGGCGAACGGGTGAGTAACACGTGAGCAACCTACCCTAGACTCTGGAATAACCATGGGAAACGATGGCTAATACCGGATACGAGGCATACACGCATGTGTGGTGTCTGGAAAGATTTATCGGTCTGGGATGGGCTCGCGGCCTATCAGCTTGTTGGTGGGGTAGTGGCCTACCAAGGCGACGACGGGTAGCCGGCCTGAGAGGGCGACCGGCCACACTGGGACTGAGATACGGCCCAGACTCCTACGGGAGGCAGCAGTGGGGAATATTGCACAATGGGCGCAAGCCTGATGCAGCGACGCCGCGTGAGGGATGACGGCCTTCGGGTTGTAAACCTCTTTCAGCAGGGAAGAAGCGCAAGTGACGGTACCTGCA…	Cellulomonadaceae	Cellulomonas humilata	99.37	24.9	14.2	-0.674779
Cm02	TSB	GAACGGTGATGGCCAGCTTGCTGGTCTGATCAGTGGCGAACGGGTGAGTAACACGTGAGCAACCTACCCTAGACTCTGGAATAACCATGGGAAACGATGGCTAATACCGGATACGAGGCATACACGCATGTGTGGTGTCTGGAAAGATTTATCGGTCTGGGATGGGCTCGCGGCCTATCAGCTTGTTGGTGGGGTAGTGGCCTACCAAGGCGACGACGGGTAGCCGGCCTGAGAGGGCGACCGGCCACACTGGGACTGAGATACGGCCCAGACTCCTACGGGAGGCAGCAGTGGGGAATATTGCACAATGGGCGCAAGCCTGATGCAGCGACGCCGCGTGAGGGATGACGGCCTTCGGGTTGTAAACCTCTTTCAGCAGGGAAGAAGCGCAAGTGACGG…	Cellulomonadaceae	Cellulomonas humilata	99.37	32.7333	27.6667	-0.285614
Mc01	ISP1	CAGTCGAACGATGATGCCCGCTTGCTGGTGGATTAGTGGCGAACGGGTGAGTAACACGTGAGTAACCTGCCCTTGACTCTGGGATAAGCCTGGGAAACTGGGTCTAATACCGGATATGACTCCTCATCGCATGGTGGGGGGTGGAAAGCTTTTGTGGTTTTGGATGGACTCGCGGCCTATCAGCTTGTTGGTGAGGTAATGGCTCACCAAGGCGACGACGGGTAGCCGGCCTGAGAGGGTGACCGGCCACACTGGGACTGAGACACGGCCCAGACTCCTACGGGAGGCAGCAGTGGGGAATATTGCACAATGGGCGGAAGCCTGATGCAGCGACGCCGCGTGAGGGATGACGGCCTTCGGGTTGTAAACCTCTTTCAGTAGGGAAGAAGCGTAAGTGAC…	Micrococcaceae	Arthrobacter pascens	99.25	21.78	22.7	0.0862654
Nc01	TSB	CACATGCAAGTCGAGCGGTAAGGCTCCTTCGGGAGTACACGAGCGGCGAACGGGTGAGTAACACGTGAGCAATCTGCCCTTCTCATCGGAATAAGCGTTGGAAACGACGTCTAATGCCGAATATGACCTCCTTTCGCATGTTAGGAGGTGGAAAGCTCCGGCGGAGAAGGATGAGCTCGCGGCCTATCAGCTTGTTGGTGAGGTAATGGCTCACCAAGGCGACGACGGGTAGCCGGCCTGAGAGGGTGACCGGCCACACTGGGACTGAGACACGGCCCAGACTCCTACGGGAGGCAGCAGTGGGGAATATTGGACAATGGGCGAAAGCCTGATCCAGCAACGCCGCGTGAGGGATGACGGCCTTCGGGTTGTAAACCTCTTTCAGCGGGGACGAAGCGA…	Nocardioidaceae	Aeromicrobium lacus	98.25	28.16	27.56	-0.0421597
Nc02	R2A	AGTCGAGCGGAAAGGCTCCTTCGGGGGTACTCGAGCGGCGAACGGGTGAGTAACACGTGAGTAATCTGCCCTGGACTCTGGGATAGCCACCGGAAACGGTGATTAATACCGGATATGACCACTTTAGGCATCTGAGGTGGTGGAAAGTTTTTCGGTCCAGGATGTGCTCGCGGCCTATCAGCTTGTTGGTGAGGTAATGGCTCACCAAGGCTTTGACGGGTAGCCGGCCTGAGAGGGTGACCGGTCACACTGGGACTGAGACACGGCCCAGACTCCTACGGGAGGCAGCAGTGGGGAATATTGGACAATGGGCGGAAGCCTGATCCAGCAACGCCGCGTGAGGGATGACGGCCTTCGGGTTGTAAACCTCTTTCAGTACCGACGAAGCGAAAGTGACGG…	Nocardioidaceae	Nocardioides simplex	98.63	19.425	19.05	-0.0382374
Nc03	TSB	GAGCGGAAAGGCCCTTCGGGGTACTCGAGCGGCGAACGGGTGAGTAACACGTGAGTAATCTGCCCCAGGCTCTGGGATAGCCACCGGAAACGGTGATTAATACCGGATACGACAACCGATTGCATGATCTGGTTGTGGAAAGTTTTTCGGCCTGGGATGTGCTCGCGGCCTATCAGCTTGTTGGTGAGGTAATGGCTCACCAAGGCTTCGACGGGTAGCCGGCCTGAGAGGGTGACCGGCCACACTGGGACTGAGACACGGCCCAGACTCCTACGGGAGGCAGCAGTGGGGAATATTGGACAATGGGCGGAAGCCTGATCCAGCAACGCCGCGTGAGGGATGACGGCCTTCGGGTTGTAAACCTCTTTCAGCACAGACGAAGCGCAAGTGACGGTATGT…	Nocardioidaceae	Nocardioides albus	99.25	23.275	25.875	0.235894
Nc04	R2A	GCAGTCGAGCGGAAAGGCCCTTTCGGGGGTACTCGAGCGGCGAACGGGTGAGTAACACGTGAGTAATCTGCCCTGTACTCTGGGATAGCCTTGGGAAACTGAGATTAATACCGGATATGAAATCTGATCGCATGGTTGGGTTTGGAAAGTTTTTTCGGTACAGGATGTGCTCGCGGCCTATCAGCTTGTTGGTGAGGTAATGGCTCACCAAGGCTTCGACGGGTAGCCGGCCTGAGAGGGTGACCGGCCACACTGGGACTGAGACACGGCCCAGACTCCTACGGGAGGCAGCAGTGGGGAATATTGGACAATGGGCGGAAGCCTGATCCAGCAACGCCGCGTGAGGGATGACGGCCTTCGGGTTGTAAACCTCTTTCAGTGCAGACGAAGCGCAAGTGA…	Nocardioidaceae	Nocardioides ultimimeridianus	95.13	31.625	31.825	0.0126882
Gd01	ISP1	GAACGGAAAGGCCCTTCGGGGTACTCGAGTGGCGAACGGGTGAGTAACACGTGGGTGATCTGCCTCGTACTCTGGGATAAGCCTGGGAAACTGGGTCTAATACCGGATAGGACCATTCTCTGCATGGGGGGTGGTGGAAAGTTTTTCGGTACGAGATGGGCCCGCGGCCTATCAGCTTGTTGGTGGGGTAATGGCCTACCAAGGCGACGACGGGTAGCCGGCCTGAGAGGGCGACCGGCCACACTGGGACTGAGACACGGCCCAGACTCCTACGGGAGGCAGCAGTGGGGAATATTGCACAATGGGCGCAAGCCTGATGCAGCGACGCCGCGTGAGGGATGACGGCCTTCGGGTTGTAAACCTCTTTCACCAGGGGCGAATGTGACGGTACCTGGAGAA…	Gordoniaceae	Williamsia serinedens	99	28.96	31.78	0.204233
Gd02	TSB	ACGGAAGGCCCTTCGGGGTACTCGAGTGGCGAACGGGTGAGTAACACGTGGGTGATCTGCCTCGTACTCTGGGATAAGCCTGGGAAACTGGGTCTAATACCGGATAGGACCATTCTCTGCATGGGGGGTGGTGGAAAGTTTTTCGGTACGAGATGGGCCCGCGGCCTATCAGCTTGTTGGTGGGGTAATGGCCTACCAAGGCGACGACGGGTAGCCGGCCTGAGAGGGCGACCGGCCACACTGGGACTGAGACACGGCCCAGACTCCTACGGGAGGCAGCAGTGGGGAATATTGCACAATGGGCGCAAGCCTGATGCAGCGACGCCGCGTGAGGGATGACGGCCTTCGGGTTGTAAACCTCTTTCACCAGGGGCGAATGTGACGGTACCTGGAGAAGAA…	Gordoniaceae	Williamsia serinedens	98.62	23.475	23.625	0.0128204
Gd03	R2A	CATGCAAGTCGAACGGAAAGGCCCAGCTTGCTGGGTACTCGAGTGGCGAACGGGTGAGTAACACGTGGGTGATCTGCCCCTGACTTCGGGATAAGCCTGGGAAACTGGGTCTAATACCGGATATGACCATGACCTGCATGGGTTGTGGTGGAAAGCTTTTGCGGTTGGGGATGGGCCCGCGGCCTATCAGCTTGTTGGTGGGGTAATGGCCTACCAAGGCGACGACGGGTAGCCGACCTGAGAGGGTGATCGGCCACACTGGGACTGAGACACGGCCCAGACTCCTACGGGAGGCAGCAGTGGGGAATATTGCACAATGGGCGCAAGCCTGATGCAGCGACGCCGCGTGAGGGATGACGGCCTTCGGGTTGTAAACCTCTTTCACCAGGGACGAAGCGC…	Gordoniaceae	Gordonia soli	99.75	19.25	21.25	0.218587
Gd04	TSB	ACGGAAAGGCCCAGCTTGCTGGGTACTCGAGTGGCGAACGGGTGAGTAACACGTGGGTGATCTGCCCCTGACTTCGGGATAAGCCTGGGAAACTGGGTCTAATACCGGATATGACCATGACCTGCATGGGTTGTGGTGGAAAGCTTTTGCGGTTGGGGATGGGCCCGCGGCCTATCAGCTTGTTGGTGGGGTAATGGCCTACCAAGGCGACGACGGGTAGCCGACCTGAGAGGGTGATCGGCCACACTGGGACTGAGACACGGCCCAGACTCCTACGGGAGGCAGCAGTGGGGAATATTGCACAATGGGCGCAAGCCTGATGCAGCGACGCCGCGTGAGGGATGACGGCCTTCGGGTTGTAAACCTCTTTCACCAGGGACGAAGCGCGAGTGACGGTAC…	Gordoniaceae	Gordonia soli	99.75	26	26.5	0.0388314
Pb01	TSB	ATGCAAGTCGAGCGCCCCGCAAGGGGAGCGGCAGACGGGTGAGTAACGCGTGGGAATCTACCCATCACTACGGAACAACTCCGGGAAACTGGAGCTAATACCGTATACGTCCTTCGGGAGAAAGATTTATCGGTGATGGATGAGCCCGCGTTGGATTAGCTAGTTGGTGGGGTAATGGCCTACCAAGGCGACGATCCATAGCTGGTCTGAGAGGATGATCAGCCACACTGGGACTGAGACACGGCCCAGACTCCTACGGGAGGCAGCAGTGGGGAATATTGGACAATGGGCGAAAGCCTGATCCAGCCATGCCGCGTGAGTGATGAAGGCCCTAGGGTTGTAAAGCTCTTTCAACGGTGAAGATAATGACGGTAACCGTAGAAGAAGCCCCGGCTAACT…	Phyllobacteriaceae	Mesorhizobium amorphae	98.63	14.4	14.5	0.0139371
Eb01	TSB	CATGCAGTCGAACGGTAGCACAGAGAGCTTGCTCTCGGGTGACGAGTGGCGGACGGGTGAGTAATGTCTGGGAAACTGCCTGATGGAGGGGGATAACTACTGGAAACGGTAGCTAATACCGCATAACGTCGCAAGACCAAAGAGGGGGACCTTCGGGCCTCTTGCCATCAGATGTGCCCAGATGGGATTAGCTAGTAGGTGGGGTAACGGCTCACCTAGGCGACGATCCCTAGCTGGTCTGAGAGGATGACCAGCCACACTGGAACTGAGACACGGTCCAGACTCCTACGGGAGGCAGCAGTGGGGAATATTGCACAATGGGCGCAAGCCTGATGCAGCCATGCCGCGTGTATGAAGAAGGCCTTCGGGTTGTAAAGTACTTTCAGCGGGGAGGAAGGC…	Enterobacteriaceae	Enterobacter cancerogenus	99.75	15.05	14.2	-0.109767
Pm01	TSB	ATGCAAGTCGAGCGGATGAGAGGAGCTTGCTCCTGGATTCAGCGGCGGACGGGTGAGTAATGCCTAGGAATCTGCCTGGTAGTGGGGGACAACGTCTCGAAAGGGACGCTAATACCGCATACGTCCTACGGGAGAAAGCAGGGGACCTTCGGGCCTTGCGCTATCAGATGAGCCTAGGTCGGATTAGCTAGTTGGTGAGGTAATGGCTCACCAAGGCGACGATCCGTAACTGGTCTGAGAGGATGATCAGTCACACTGGAACTGAGACACGGTCCAGACTCCTACGGGAGGCAGCAGTGGGGAATATTGGACAATGGGCGAAAGCCTGATCCAGCCATGCCGCGTGTGTGAAGAAGGTCTTCGGATTGTAAAGCACTTTAAGTTGGGAGGAAGGGCAGT…	Pseudomonadaceae	Pseudomonas crudilactis	98.75	16.325	16.125	-0.0243522
Pm02	TSB	ATGCAAGTCGAGCGGATGAGAAGAGCTTGCTCTTCGATTCAGCGGCGGACGGGTGAGTAATGCCTAGGAATCTGCCTGGTAGTGGGGGACAACGTTTCGAAAGGAACGCTAATACCGCATACGTCCTACGGGAGAAAGCAGGGGACCTTCGGGCCTTGCGCTATCAGATGAGCCTAGGTCGGATTAGCTAGTTGGTGAGGTAATGGCTCACCAAGGCGACGATCCGTAACTGGTCTGAGAGGATGATCAGTCACACTGGAACTGAGACACGGTCCAGACTCCTACGGGAGGCAGCAGTGGGGAATATTGGACAATGGGCGAAAGCCTGATCCAGCCATGCCGCGTGTGTGAAGAAGGTCTTCGGATTGTAAAGCACTTTAAGTTGGGAGGAAGGGCATT…	Pseudomonadaceae	Pseudomonas putida	99.88	14.325	14.4	0.0104986
Pm03	TSB	GTCGAGCGGATGAAGGGAGCTTGCTCCTGAATTCAGCGGCGGACGGGTGAGTAATGCCTAGGAATCTGCCTGGTAGTGGGGGACAACGTTTCGAAAGGAACGCTAATACCGCATACGTCCTACGGGAGAAAGCAGGGGACCTTCGGGCCTTGCGCTATCAGATGAGCCTAGGTCGGATTAGCTAGTTGGTGAGGTAATGGCTCACCAAGGCGACGATCCGTAACTGGTCTGAGAGGATGATCAGTCACACTGGAACTGAGACACGGTCCAGACTCCTACGGGAGGCAGCAGTGGGGAATATTGGACAATGGGCGAAAGCCTGATCCAGCCATGCCGCGTGTGTGAAGAAGGTCTTCGGATTGTAAAGCACTTTAAGTTGGGAGGAAGGGTTGTAGATTA…	Pseudomonadaceae	Pseudomonas glycinae	100	14	13.6667	-0.0470522
Bk01	TSB	AGTCGAACGGCAGCATGATCTAGCTTGCTAGATTGATGGCGAGTGGCGAACGGGTGAGTAATACATCGGAACGTGCCCTGTAGTGGGGGAGAACTAGTCGAAAGATTAGCTAATACCGCATACGACCTGAGGGTGAAAGTGGGGGAGCGCAAGGCCTCATGCTATAGGAGCGGCCGATGTCTGATTAGCTAGTTGGTGGGGTAAAGGCCCACCAAGGCGACGATCAGTAGCTGGTCTGAGAGGACGATCAGCCACACTGGGACTGAGACACGGCCCAGACTCCTACGGGAGGCAGCAGTGGGGAATTTTGGACAATGGGGGCAACCCTGATCCAGCAATGCCGCGTGTGTGAAGAAGGCCTTCGGGTTGTAAAGCACTTTTGTCCGGAAAGAAATCGCA…	Burkholderiaceae	Ralstonia insidiosa	99	10.3	9.8	-0.0947309
Bk02	R2A	TCGAACGGCAGCGCGGACTTCGGTCTGGCGGCGAGTGGCGAACGGGTGAGTAATACATCGGAACGTACCCTGTTGTGGGGGATAACTAGTCGAAAGATTAGCTAATACCGCATACGACCTGAGGGTGAAAGCGGGGGACCGAAAGGCCTCGCGCAGCAGGAGCGGCCGATGTCTGATTAGCTAGTTGGTGGGGTAAAGGCCCACCAAGGCGACGATCAGTAGCTGGTCTGAGAGGACGATCAGCCACACTGGGACTGAGACACGGCCCAGACTCCTACGGGAGGCAGCAGTGGGGAATTTTGGACAATGGGGGCAACCCTGATCCAGCAATGCCGCGTGTGTGAAGAAGGCCTTCGGGTTGTAAAGCACTTTTGTCCGGAAAGAAAACGCTCTGGTTAA…	Burkholderiaceae	Cupriavidus agavae	98.63	20.25	20	-0.0245389
Rb01	TSB	CATGCAAGTCGAACGGCAGCACAGCAGAGCTTGCTCTGTGGGTGGCGAGTGGCGGACGGGTGAGTAATGCATCGGGACCTACCCAGACGTGGGGGATAACGTAGGGAAACTTACGCTAATACCGCATACGTCCTACGGGAGAAAGCGGGGGATCGCAAGACCTCGCGCGGTTGGATGGACCGATGTGCGATTAGCTAGTTGGTGAGGTAACGGCTCACCAAGGCGACGATCGCTAGCTGGTCTGAGAGGATGATCAGCCACACTGGGACTGAGACACGGCCCAGACTCCTACGGGAGGCAGCAGTGGGGAATATTGGACAATGGGCGCAAGCCTGATCCAGCAATGCCGCGTGTGTGAAGAAGGCCTTCGGGTTGTAAAGCACTTTTATCAGGAGCGAA…	Rhodanobacteraceae	Luteibacter aegosomaticola	99	20.75	21.75	0.0987081
Lb01	ISP	GAACGGCAGCACAGTAAGAGCTTGCTCTTATGGGTGGCGAGTGGCGGACGGGTGAGGAATACATCGGAATCTACCTTTTCGTGGGGGATAACGTAGGGAAACTTACGCTAATACCGCATACGACCTTCGGGTGAAAGCAGGGGACCTTCGGGCCTTGCGCGATTAGATGAGCCGATGTCGGATTAGCTAGTTGGTGAGGTAAAGGCTCACCAAGGCGACGATCCGTAGCTGGTCTGAGAGGATGATCAGCCACACTGGAACTGAGACACGGTCCAGACTCCTACGGGAGGCAGCAGTGGGGAATATTGGACAATGGGCGCAAGCCTGATCCAGCCATGCCGCGTGGGTGAAGAAGGCCTTCGGGTTGTAAAGCCCTTTTGTTGGGAAAGAAAAGCAGTC…	Lysobacteraceae	Stenotrophomonas panacihumi	100	20.2667	20.5333	0.0264889
Lb02	TSB	CATGCAAGTCGAACGGCAGCACAGGAGAGCTTGCTCTCTGGGTGGCGAGTGGCGGACGGGTGAGGAATACATCGGAATCTACCTTTTCGTGGGGGATAACGTAGGGAAACTTACGCTAATACCGCATACGACCTTCGGGTGAAAGCAGGGGACCTTCGGGCCTTGCGCGGATAGATGAGCCGATGTCGGATTAGCTAGTTGGCGGGGTAAAGGCCCACCAAGGCGACGATCCGTAGCTGGTCTGAGAGGATGATCAGCCACACTGGAACTGAGACACGGTCCAGACTCCTACGGGAGGCAGCAGTGGGGAATATTGGACAATGGGCGCAAGCCTGATCCAGCCATACCGCGTGGGTGAAGAAGGCCTTCGGGTTGTAAAGCCCTTTTGTTGGGAAAGAA…	Lysobacteraceae	Stenotrophomonas bentonitica	100	19.1	18.9	-0.0208328
Lb03	R2A	TGCAAGTCGAACGGCAGCACAGGAGAGCTTGCTCTCTGGGTGGCGAGTGGCGGACGGGTGAGGAATACATCGGAATCTACTCTGTCGTGGGGGATAACGTAGGGAAACTTACGCTAATACCGCATACGACCTACGGGTGAAAGCAGGGGATCTTCGGACCTTGCGCGATTGAATGAGCCGATGTCGGATTAGCTAGTTGGCGGGGTAAAGGCCCACCAAGGCGACGATCCGTAGCTGGTCTGAGAGGATGATCAGCCACACTGGAACTGAGACACGGTCCAGACTCCTACGGGAGGCAGCAGTGGGGAATATTGGACAATGGGCGCAAGCCTGATCCAGCCATACCGCGTGGGTGAAGAAGGCCTTCGGGTTGTAAAGCCCTTTTGTTGGGAAAGAAAT…	Lysobacteraceae	Stenotrophomonas maltophilia	99.63	16	16.1	0.0125391
Lb04	R2A	GCAAGTCGAACGGCAGCACAGGAGAGCTTGCTCTCTGGGTGGCGAGTGGCGGACGGGTGAGGAATACATCGGAATCTACTCTGTCGTGGGGGATAACGTAGGGAAACTTACGCTAATACCGCATACGACCTACGGGTGAAAGCAGGGGATCTTCGGACCTTGCGCGATTGAATGAGCCGATGTCGGATTAGCTAGTTGGCGGGGTAAAGGCCCACCAAGGCGACGATCCGTAGCTGGTCTGAGAGGATGATCAGCCACACTGGAACTGAGACACGGTCCAGACTCCTACGGGAGGCAGCAGTGGGGAATATTGGACAATGGGCGCAAGCCTGATCCAGCCATACCGCGTGGGTGAAGAAGGCCTTCGGGTTGTAAAGCCCTTTTGTTGGGAAAGAAATC…	Lysobacteraceae	Stenotrophomonas maltophilia	99.63	17.2	16.6	-0.0685506
Lb05	TSB	TCGAACGGCAGCACAGAGGAGCTTGCTCCTTGGGTGGCGAGTGGCGGACGGGTGAGGAATGCATCGGAATCTGCCTATTTGTGGGGGATAACGTAGGGAAACTTACGCTAATACCGCATACGTCCTACGGGAGAAAGTGGGGGACCGCAAGGCCTCACGCAGATAGATGAGCCGATGCCGGATTAGCTAGTTGGCGGGGTAAAGGCCCACCAAGGCGACGATCCGTAGCTGGTCTGAGAGGATGATCAGCCACACTGGAACTGAGACACGGTCCAGACTCCTACGGGAGGCAGCAGTGGGGAATATTGGACAATGGGCGCAAGCCTGATCCAGCCATGCCGCGTGTGTGAAGAAGGCCTTCGGGTTGTAAAGCACTTTTGTCCGGAAAGAAAAGCATTC…	Lysobacteraceae	Lysobacter auxotrophicus	98.75	25.15	24.85	-0.0237146
Lb06	TSB	ACATGCAGTCGAACGGCAGCACAGAGGAGCTTGCTCCTTGGGTGGCGAGTGGCGGACGGGTGAGGAATGCATCGGAATCTGCCTATTTGTGGGGGATAACGTAGGGAAACTTACGCTAATACCGCATACGTCCTACGGGAGAAAGTGGGGGACCGCAAGGCCTCACGCAGATAGATGAGCCGATGCCGGATTAGCTAGTTGGCGGGGTAAAGGCCCACCAAGGCGACGATCCGTAGCTGGTCTGAGAGGATGATCAGCCACACTGGAACTGAGACACGGTCCAGACTCCTACGGGAGGCAGCAGTGGGGAATATTGGACAATGGGCGCAAGCCTGATCCAGCCATGCCGCGTGTGTGAAGAAGGCCTTCGGGTTGTAAAGCACTTTTGTCCGGAAAGAA…	Lysobacteraceae	Lysobacter soli	99.5	24	24	0
Lb07	TSB	TCGAACGGCAGCACAGCAGTAGCAATACTGTGGGTGGCGAGTGGCGGACGGGTGAGGAATGCATCGGAATCTGCCTATTTGTGGGGGATAACGTAGGGAAACTTACGCTAATACCGCATACGTCCTACGGGAGAAAGTGGGGGACCGCAAGGCCTCACGCAGATAGATGAGCCGATGCCGGATTAGCTAGTTGGCGGGGTAAAGGCCCACCAAGGCGACGATCCGTAGCTGGTCTGAGAGGATGATCAGCCACACTGGAACTGAGACACGGTCCAGACTCCTACGGGAGGCAGCAGTGGGGAATATTGGACAATGGGCGCAAGCCTGATCCAGCCATGCCGCGTGTGTGAAGAAGGCCTTCGGGTTGTAAAGCACTTTTGTCCGGAAAGAAAAGCATTC…	Lysobacteraceae	Lysobacter niastensis	98.38	23.76	25.32	0.135624
Lb08	TSB	GCAAGTCGAGCGGCAGCGCGGATGTAGCAATACATCTGGCGGCGAGCGGCGGACGGGTGAGGAATGCGTCGGAATCTGCCTCTTTGTGGGGGATAACGTAGGGAAACTTACGCTAATACCGCATACGACCTACGGGTGAAAGTGGGGGACCGCAAGGCCTCACGCAGAGAGATGAGCCGACGCCGGATTAGCTAGTTGGCGGGGTAAAGGCCCACCAAGGCGACGATCCGTAGCTGGTCTGAGAGGATGATCAGCCACACTGGAACTGAGACACGGTCCAGACTCCTACGGGAGGCAGCAGTGGGGAATATTGGACAATGGGCGCAAGCCTGATCCAGCCATGCCGCGTGTGTGAAGAAGGCCTTCGGGTTGTAAAGCACTTTTGTCCGGAAAGAAAAG…	Lysobacteraceae	Lysobacter niabensis	99.5	26.2	25.96	-0.0182367
Lb09	TSB	GTCGAGCGGCAGCGCAGCAGTAGCAATACTGTGGGCGGCGAGCGGCGGACGGGTGAGGAATGCATCGGAATCTGCCTATTTGTGGGGGATAACGTAGGGAAACTTACGCTAATACCGCATACGACCTACGGGTGAAAGTGGGGGACCGCAAGGCCTCACGCAGATAGATGAGCCGATGCCGGATTAGCTAGTTGGCGGGGTAAAGGCCCACCAAGGCGACGATCCGTAGCTGGTCTGAGAGGATGATCAGCCACACTGGAACTGAGACACGGTCCAGACTCCTACGGGAGGCAGCAGTGGGGAATATTGGACAATGGGCGCAAGCCTGATCCAGCCATGCCGCGTGTGTGAAGAAGGCCTTCGGGTTGTAAAGCACTTTTGTCCGGAAAGAAAACCTAT…	Lysobacteraceae	Lysobacter panacisoli	97.99	25.02	24.04	-0.0768031
Lb10	TSB	CACATGCAGTCGAACGGCAGCACAGCAGTAGCAATACTGTGGGTGGCGAGTGGCGGACGGGTGAGGAATGCATCGGAATCTGCCTATTTGTGGGGGATAACGTAGGGAAACTTACGCTAATACCGCATACGTCCTACGGGAGAAAGTGGGGGACCTTCGGGCCTCACGCAGATAGATGAGCCGATGCCGGATTAGCTAGTTGGCGGGGTAAAGGCCCACCAAGGCGACGATCCGTAGCTGGTCTGAGAGGATGATCAGCCACACTGGAACTGAGACACGGTCCAGACTCCTACGGGAGGCAGCAGTGGGGAATATTGGACAATGGGCGCAAGCCTGATCCAGCCATGCCGCGTGTGTGAAGAAGGCCTTCGGGTTGTAAAGCACTTTTGTCCGGAAAGA…	Lysobacteraceae	Lysobacter panacisoli	99	24	23.1667	-0.0682388
Lb11	TSB	AGTCGAACGGCAGCACAGCAGTAGCAATACTGTGGGTGGCGAGTGGCGGACGGGTGAGGAATGCATCGGAATCTGCCTATTTGTGGGGGATAACGTAGGGAAACTTACGCTAATACCGCATACGTCCTACGGGAGAAAGTGGGGGACCGCAAGGCCTCACGCAGATAGATGAGCCGATGCCGGATTAGCTAGTTGGCGGGGTAAAGGCCCACCAAGGCGACGATCCGTAGCTGGTCTGAGAGGATGATCAGCCACACTGGAACTGAGACACGGTCCAGACTCCTACGGGAGGCAGCAGTGGGGAATATTGGACAATGGGCGCAAGCCTGATCCAGCCATGCCGCGTGTGTGAAGAAGGCCTTCGGGTTGTAAAGCACTTTTGTCCGGAAAGAAAAGCCA…	Lysobacteraceae	Lysobacter prati	99	24.9143	24.2143	-0.0554033
Lb12	TSB	GAACGGCATCACAGCAGTATCAATACTGTGGGTGGCGAGTGGCGGACGGGTGAGGAATGCATCGGAATCTGCCTCTTTGTGGGGGATAACGTAGGGAAACTTACGCTAATACCGCATACGTCCTACGGGAGAAAGTGGGGGACCTTCGGGCCTCACGCAGATAGATGAGCCGATGCCGGATTAGCTAGTTGGCGGGGTAAAGGCCCACCAAGGCGACGATCCGTAGCTGGTCTGAGAGGATGATCAGCCACACTGGAACTGAGACACGGTCCAGACTCCTACGGGAGGCAGCAGTGGGGAATATTGGACAATGGGCGCAAGCCTGATCCAGCCATGCCGCGTGTGTGAAGAAGGCCTTCGGGTTGTAAAGCACTTTTGTCCGGAAAGAAAAGCTTCGGG…	Lysobacteraceae	Lysobacter prati	99.5	26.725	26.525	-0.0149113
Lb13	TSB	CATGCAGTCGAACGGCATCACAGCAGTATCAATACTGGGGGTGGCGAGTGGCGGACGGGTGAGGAATGCATCGGAATCTGACCCTTTATGGGGTCTAACGTAGGGAAACTTACGCTAATACCGCATACGTCCTACGGGAGAAAGTGGGGGACCGCAAGGCCTCACGCAGATAGATGAGCCGATGCCGGATTAGCTAGTTGGCGGGGTAAAGGCCCACCAAGGCGACGATCCGTAGCTGGTCTGAGAGGATGATCAGCCACACTGGAACTGAGACACGGTCCAGACTCCTACGGGAGGCAGCAGTGGGGAATATTGGACAATGGGCGCAAGCCTGATCCAGCCATGCCGCGTGTGTGAAGAAGGCCTTCGGGTTGTAAAGCACTTTTGTCCGGAAAGAAA…	Lysobacteraceae	Lysobacter prati	97.88	24.7	24.5333	-0.0134497

## Sheet: Supplementary Data 2
Genome	Phylum	Class	Order	Family	Genus	Region	Type	Gbk file	RegionStart	RegionEnd	RegionLength	RegionOrfNum	AIP_BGC_start	AIP_BGC_end	AgrB_ID	AgrD_ID	AgrE_ID	AIP_pre_TrRiPP	Precursor
[Brevibacterium]_frigoritolerans_44_GCF_014876495.1	Firmicutes	Bacilli	Bacillales	Bacillaceae	Bacillus	r2c2	cyclic-lactone-autoinducer	c00002_NZ_JADA...region002.gbk	116022	136654	20633	20	116021	136654	[Brevibacterium]_frigoritolerans_44_GCF_014876495.1__r2c2__ctg2_117				N
[Brevibacterium]_frigoritolerans_44_GCF_014876505.1	Firmicutes	Bacilli	Bacillales	Bacillaceae	Bacillus	r6c2	cyclic-lactone-autoinducer	c00006_NZ_JADA...region002.gbk	119870	140502	20633	20	119869	140502	[Brevibacterium]_frigoritolerans_44_GCF_014876505.1__r6c2__ctg6_117				N
[Brevibacterium]_frigoritolerans_44_GCF_014876535.1	Firmicutes	Bacilli	Bacillales	Bacillaceae	Bacillus	r14c2	cyclic-lactone-autoinducer	c00014_NZ_JADA...region002.gbk	477628	498260	20633	20	477627	498260	[Brevibacterium]_frigoritolerans_44_GCF_014876535.1__r14c2__ctg14_476				N
[Brevibacterium]_frigoritolerans_44_GCF_014876545.1	Firmicutes	Bacilli	Bacillales	Bacillaceae	Bacillus	r12c3	cyclic-lactone-autoinducer	c00012_NZ_JADA...region003.gbk	828720	849352	20633	20	828719	849352	[Brevibacterium]_frigoritolerans_44_GCF_014876545.1__r12c3__ctg12_833				N
[Brevibacterium]_frigoritolerans_44_GCF_014876555.1	Firmicutes	Bacilli	Bacillales	Bacillaceae	Bacillus	r10c7	cyclic-lactone-autoinducer	c00010_NZ_JADA...region007.gbk	3249597	3270229	20633	19	3249596	3270229	[Brevibacterium]_frigoritolerans_44_GCF_014876555.1__r10c7__ctg10_3193				N
[Brevibacterium]_frigoritolerans_44_GCF_014876615.1	Firmicutes	Bacilli	Bacillales	Bacillaceae	Bacillus	r24c2	cyclic-lactone-autoinducer	c00024_NZ_JADA...region002.gbk	120590	141222	20633	20	120589	141222	[Brevibacterium]_frigoritolerans_44_GCF_014876615.1__r24c2__ctg24_117				N
[Brevibacterium]_frigoritolerans_GD44_GCF_004525735.1	Firmicutes	Bacilli	Bacillales	Bacillaceae	Bacillus	r12c2	cyclic-lactone-autoinducer	NZ_SPDU01000002.region002.gbk	477913	498545	20633	20	477912	498545	[Brevibacterium]_frigoritolerans_GD44_GCF_004525735.1__r12c2__ctg12_476				N
[Butyribacterium]_methylotrophicum_DSM_3468_GCF_001753695.1	Firmicutes	Clostridia	Eubacteriales	Clostridiaceae	Clostridium	r12c2	RiPP-like,cyclic-lactone-autoinducer	NZ_MIMZ01000012.region002.gbk	279156	304807	25652	32	279155	304807	[Butyribacterium]_methylotrophicum_DSM_3468_GCF_001753695.1__r12c2__ctg12_279	[Butyribacterium]_methylotrophicum_DSM_3468_GCF_001753695.1__r12c2__ctg12_273		GCF_001753695.1/NZ_MIMZ01000012.region002_16 # 10001 # 10159 # 1 # ID=10367_16;partial=00;start_type=ATG;rbs_motif=GGAG/GAGG;rbs_spacer=5-10bp;gc_cont=0.371	Y
[Butyribacterium]_methylotrophicum_DSM_3468_GCF_001753695.1	Firmicutes	Clostridia	Eubacteriales	Clostridiaceae	Clostridium	r22c1	cyclic-lactone-autoinducer	NZ_MIMZ01000024.region001.gbk	10521	31072	20552	20	10520	31072	[Butyribacterium]_methylotrophicum_DSM_3468_GCF_001753695.1__r22c1__ctg22_18			GCF_001753695.1/NZ_MIMZ01000024.region001_9 # 9828 # 9977 # 1 # ID=10368_9;partial=00;start_type=ATG;rbs_motif=GGAG/GAGG;rbs_spacer=5-10bp;gc_cont=0.340	Y
[Clostridium]_aerotolerans_DSM_5434_GCF_000687555.1	Firmicutes	Clostridia	Eubacteriales	Lachnospiraceae	Lacrimispora	r2c1	cyclic-lactone-autoinducer	NZ_JHWJ01000002.region001.gbk	227701	248008	20308	22	227700	248008	[Clostridium]_aerotolerans_DSM_5434_GCF_000687555.1__r2c1__ctg2_200	[Clostridium]_aerotolerans_DSM_5434_GCF_000687555.1__r2c1__ctg2_201		GCF_000687555.1/NZ_JHWJ01000002.region001_12 # 10466 # 10612 # -1 # ID=10380_12;partial=00;start_type=ATG;rbs_motif=GGAGG;rbs_spacer=5-10bp;gc_cont=0.320	Y
[Clostridium]_aerotolerans_DSM_5434_GCF_000687555.1	Firmicutes	Clostridia	Eubacteriales	Lachnospiraceae	Lacrimispora	r2c2	cyclic-lactone-autoinducer	NZ_JHWJ01000002.region002.gbk	273210	296750	23541	23	273209	296750	[Clostridium]_aerotolerans_DSM_5434_GCF_000687555.1__r2c2__ctg2_250	[Clostridium]_aerotolerans_DSM_5434_GCF_000687555.1__r2c2__ctg2_246			Y
[Clostridium]_aerotolerans_DSM_5434_GCF_000687555.1	Firmicutes	Clostridia	Eubacteriales	Lachnospiraceae	Lacrimispora	r3c1	cyclic-lactone-autoinducer	NZ_JHWJ01000003.region001.gbk	63548	84293	20746	19	63547	84293	[Clostridium]_aerotolerans_DSM_5434_GCF_000687555.1__r3c1__ctg3_67	[Clostridium]_aerotolerans_DSM_5434_GCF_000687555.1__r3c1__ctg3_68		GCF_000687555.1/NZ_JHWJ01000003.region001_11 # 10582 # 10746 # -1 # ID=10382_11;partial=00;start_type=ATG;rbs_motif=AGGAGG;rbs_spacer=5-10bp;gc_cont=0.303	Y
[Clostridium]_aerotolerans_DSM_5434_GCF_000687555.1	Firmicutes	Clostridia	Eubacteriales	Lachnospiraceae	Lacrimispora	r5c1	cyclic-lactone-autoinducer	NZ_JHWJ01000005.region001.gbk	225309	245860	20552	17	225308	245860	[Clostridium]_aerotolerans_DSM_5434_GCF_000687555.1__r5c1__ctg5_229				N
[Clostridium]_aerotolerans_DSM_5434_GCF_000687555.1	Firmicutes	Clostridia	Eubacteriales	Lachnospiraceae	Lacrimispora	r6c1	RRE-containing,arylpolyene,cyclic-lactone-autoinducer,resorcinol	NZ_JHWJ01000006.region001.gbk	39290	121780	82491	91	76570	97306	[Clostridium]_aerotolerans_DSM_5434_GCF_000687555.1__r6c1__ctg6_91	[Clostridium]_aerotolerans_DSM_5434_GCF_000687555.1__r6c1__ctg6_90		GCF_000687555.1/NZ_JHWJ01000006.region001_52 # 47282 # 47425 # 1 # ID=10383_52;partial=00;start_type=ATG;rbs_motif=AGGAG;rbs_spacer=5-10bp;gc_cont=0.340	Y
[Clostridium]_celerecrescens_18A_GCF_002797975.1	Firmicutes	Clostridia	Eubacteriales	Lachnospiraceae	Lacrimispora	r1c1	cyclic-lactone-autoinducer	NZ_PGET01000001.region001.gbk	1784718	1804748	20031	21	1784717	1804748	[Clostridium]_celerecrescens_18A_GCF_002797975.1__r1c1__ctg1_1679				N
[Clostridium]_celerecrescens_18A_GCF_002797975.1	Firmicutes	Clostridia	Eubacteriales	Lachnospiraceae	Lacrimispora	r1c2	cyclic-lactone-autoinducer	NZ_PGET01000001.region002.gbk	4881591	4902360	20770	18	4881590	4902360	[Clostridium]_celerecrescens_18A_GCF_002797975.1__r1c2__ctg1_4377	[Clostridium]_celerecrescens_18A_GCF_002797975.1__r1c2__ctg1_4378			Y
[Clostridium]_citroniae_WAL-17108_GCF_000233455.1	Firmicutes	Clostridia	Eubacteriales	Lachnospiraceae	Enterocloster	r1c1	cyclic-lactone-autoinducer	NZ_JH376420.1.region001.gbk	318141	338866	20726	20	318140	338866	[Clostridium]_citroniae_WAL-17108_GCF_000233455.1__r1c1__ctg1_287	[Clostridium]_citroniae_WAL-17108_GCF_000233455.1__r1c1__ctg1_288		GCF_000233455.1/NZ_JH376420.1.region001_11 # 10577 # 10726 # -1 # ID=13570_11;partial=00;start_type=ATG;rbs_motif=AGGAGG;rbs_spacer=5-10bp;gc_cont=0.400	Y
[Clostridium]_clostridioforme_2_1_49FAA_GCF_000234155.1	Firmicutes	Clostridia	Eubacteriales	Lachnospiraceae	Enterocloster	r3c1	cyclic-lactone-autoinducer	NZ_JH376872.1.region001.gbk	499074	519397	20324	18	499073	519397	[Clostridium]_clostridioforme_2_1_49FAA_GCF_000234155.1__r3c1__ctg3_491				N
[Clostridium]_clostridioforme_90A1_GCF_000371605.1	Firmicutes	Clostridia	Eubacteriales	Lachnospiraceae	Enterocloster	r10c2	cyclic-lactone-autoinducer	NZ_KB851121.1.region002.gbk	582650	602973	20324	18	582649	602973	[Clostridium]_clostridioforme_90A1_GCF_000371605.1__r10c2__ctg10_560				N
[Clostridium]_clostridioforme_90A3_GCF_000371585.1	Firmicutes	Clostridia	Eubacteriales	Lachnospiraceae	Enterocloster	r6c2	cyclic-lactone-autoinducer	NZ_KB851058.1.region002.gbk	300845	321168	20324	18	300844	321168	[Clostridium]_clostridioforme_90A3_GCF_000371585.1__r6c2__ctg6_290				N
[Clostridium]_clostridioforme_90A4_GCF_000371565.1	Firmicutes	Clostridia	Eubacteriales	Lachnospiraceae	Enterocloster	r6c1	cyclic-lactone-autoinducer	NZ_KB851069.1.region001.gbk	71954	92277	20324	18	71953	92277	[Clostridium]_clostridioforme_90A4_GCF_000371565.1__r6c1__ctg6_74				N
[Clostridium]_clostridioforme_90A6_GCF_000371545.1	Firmicutes	Clostridia	Eubacteriales	Lachnospiraceae	Enterocloster	r17c1	cyclic-lactone-autoinducer	NZ_KB851039.1.region001.gbk	158385	178708	20324	18	158384	178708	[Clostridium]_clostridioforme_90A6_GCF_000371545.1__r17c1__ctg17_166				N
[Clostridium]_clostridioforme_90A8_GCF_000371505.1	Firmicutes	Clostridia	Eubacteriales	Lachnospiraceae	Enterocloster	r7c1	cyclic-lactone-autoinducer	NZ_KB850982.1.region001.gbk	64643	84966	20324	17	64642	84966	[Clostridium]_clostridioforme_90A8_GCF_000371505.1__r7c1__ctg7_66				N
[Clostridium]_clostridioforme_90B1_GCF_000371485.1	Firmicutes	Clostridia	Eubacteriales	Lachnospiraceae	Enterocloster	r1c1	cyclic-lactone-autoinducer	NZ_KB850966.1.region001.gbk	1421680	1442003	20324	17	1421679	1442003	[Clostridium]_clostridioforme_90B1_GCF_000371485.1__r1c1__ctg1_1329				N
[Clostridium]_clostridioforme_AGR2157_GCF_000424325.1	Firmicutes	Clostridia	Eubacteriales	Lachnospiraceae	Enterocloster	r37c1	cyclic-lactone-autoinducer	NZ_AUJR01000040.region001.gbk	5134	25706	20573	24	5133	25706	[Clostridium]_clostridioforme_AGR2157_GCF_000424325.1__r37c1__ctg37_21			GCF_000424325.1/NZ_AUJR01000040.region001_9 # 9848 # 9997 # 1 # ID=13596_9;partial=00;start_type=ATG;rbs_motif=AGGAGG;rbs_spacer=5-10bp;gc_cont=0.400	Y
[Clostridium]_clostridioforme_CM201_GCF_000371405.1	Firmicutes	Clostridia	Eubacteriales	Lachnospiraceae	Enterocloster	r1c1	cyclic-lactone-autoinducer	NZ_KB850936.1.region001.gbk	2014914	2035237	20324	18	2014913	2035237	[Clostridium]_clostridioforme_CM201_GCF_000371405.1__r1c1__ctg1_1886				N
[Clostridium]_clostridioforme_WAL-7855_GCF_001078445.1	Firmicutes	Clostridia	Eubacteriales	Lachnospiraceae	Enterocloster	r4c2	cyclic-lactone-autoinducer	NZ_KQ235916.1.region002.gbk	194168	214491	20324	18	194167	214491	[Clostridium]_clostridioforme_WAL-7855_GCF_001078445.1__r4c2__ctg4_201				N
[Clostridium]_cocleatum_ATCC_29902_GCF_002803405.1	Firmicutes	Erysipelotrichia	Erysipelotrichales	Erysipelotrichaceae	Erysipelatoclostridium	r15c1	cyclic-lactone-autoinducer	NZ_PHNQ01000020.region001.gbk	18457	39132	20676	25	18456	39132	[Clostridium]_cocleatum_ATCC_29902_GCF_002803405.1__r15c1__ctg15_46	[Clostridium]_cocleatum_ATCC_29902_GCF_002803405.1__r15c1__ctg15_45		GCF_002803405.1/NZ_PHNQ01000020.region001_15 # 10001 # 10132 # -1 # ID=13624_15;partial=00;start_type=ATG;rbs_motif=None;rbs_spacer=None;gc_cont=0.303	Y
[Clostridium]_cocleatum_ATCC_29902_GCF_002803405.1	Firmicutes	Erysipelotrichia	Erysipelotrichales	Erysipelotrichaceae	Erysipelatoclostridium	r20c1	cyclic-lactone-autoinducer	NZ_PHNQ01000005.region001.gbk	1	18014	18014	17	0	18014	[Clostridium]_cocleatum_ATCC_29902_GCF_002803405.1__r20c1__ctg20_9				N
[Clostridium]_cocleatum_ATCC_29902_GCF_002803405.1	Firmicutes	Erysipelotrichia	Erysipelotrichales	Erysipelotrichaceae	Erysipelatoclostridium	r40c1	cyclic-lactone-autoinducer	NZ_PHNQ01000016.region001.gbk	104583	118476	13894	15	104582	118476	[Clostridium]_cocleatum_ATCC_29902_GCF_002803405.1__r40c1__ctg40_90				N
[Clostridium]_cocleatum_ATCC_29902_GCF_002803405.1	Firmicutes	Erysipelotrichia	Erysipelotrichales	Erysipelotrichaceae	Erysipelatoclostridium	r7c1	cyclic-lactone-autoinducer	NZ_PHNQ01000007.region001.gbk	22583	43382	20800	20	22582	43382	[Clostridium]_cocleatum_ATCC_29902_GCF_002803405.1__r7c1__ctg7_35	[Clostridium]_cocleatum_ATCC_29902_GCF_002803405.1__r7c1__ctg7_36		GCF_002803405.1/NZ_PHNQ01000007.region001_11 # 10660 # 10800 # 1 # ID=13625_11;partial=00;start_type=ATG;rbs_motif=AGGAG;rbs_spacer=5-10bp;gc_cont=0.277	Y
[Clostridium]_cocleatum_DSM_1551_GCF_900102365.1	Firmicutes	Erysipelotrichia	Erysipelotrichales	Erysipelotrichaceae	Erysipelatoclostridium	r29c1	cyclic-lactone-autoinducer	NZ_FOIN01000004.region001.gbk	40208	61007	20800	17	40207	61007	[Clostridium]_cocleatum_DSM_1551_GCF_900102365.1__r29c1__ctg29_50	[Clostridium]_cocleatum_DSM_1551_GCF_900102365.1__r29c1__ctg29_51		GCF_900102365.1/NZ_FOIN01000004.region001_10 # 10660 # 10800 # 1 # ID=13626_10;partial=00;start_type=ATG;rbs_motif=AGGAG;rbs_spacer=5-10bp;gc_cont=0.277	Y
[Clostridium]_cocleatum_DSM_1551_GCF_900102365.1	Firmicutes	Erysipelotrichia	Erysipelotrichales	Erysipelotrichaceae	Erysipelatoclostridium	r31c1	cyclic-lactone-autoinducer	NZ_FOIN01000042.region001.gbk	561	21130	20570	20	560	21130	[Clostridium]_cocleatum_DSM_1551_GCF_900102365.1__r31c1__ctg31_15				N
[Clostridium]_cocleatum_DSM_1551_GCF_900102365.1	Firmicutes	Erysipelotrichia	Erysipelotrichales	Erysipelotrichaceae	Erysipelatoclostridium	r54c1	cyclic-lactone-autoinducer	NZ_FOIN01000002.region001.gbk	96913	117497	20585	19	96912	117497	[Clostridium]_cocleatum_DSM_1551_GCF_900102365.1__r54c1__ctg54_82				N
[Clostridium]_cocleatum_DSM_1551_GCF_900102365.1	Firmicutes	Erysipelotrichia	Erysipelotrichales	Erysipelotrichaceae	Erysipelatoclostridium	r70c1	cyclic-lactone-autoinducer	NZ_FOIN01000041.region001.gbk	4718	22942	18225	17	4717	22942	[Clostridium]_cocleatum_DSM_1551_GCF_900102365.1__r70c1__ctg70_19				N
[Clostridium]_cocleatum_I50_GCF_010206155.1	Firmicutes	Erysipelotrichia	Erysipelotrichales	Erysipelotrichaceae	Erysipelatoclostridium	r23c1	cyclic-lactone-autoinducer	NZ_VIQR01000024.region001.gbk	106342	126926	20585	19	106341	126926	[Clostridium]_cocleatum_I50_GCF_010206155.1__r23c1__ctg23_91				N
[Clostridium]_cocleatum_I50_GCF_010206155.1	Firmicutes	Erysipelotrichia	Erysipelotrichales	Erysipelotrichaceae	Erysipelatoclostridium	r26c1	cyclic-lactone-autoinducer	NZ_VIQR01000037.region001.gbk	4689	22913	18225	18	4688	22913	[Clostridium]_cocleatum_I50_GCF_010206155.1__r26c1__ctg26_20				N
[Clostridium]_cocleatum_I50_GCF_010206155.1	Firmicutes	Erysipelotrichia	Erysipelotrichales	Erysipelotrichaceae	Erysipelatoclostridium	r46c1	cyclic-lactone-autoinducer	NZ_VIQR01000010.region001.gbk	40055	60854	20800	15	40054	60854	[Clostridium]_cocleatum_I50_GCF_010206155.1__r46c1__ctg46_49	[Clostridium]_cocleatum_I50_GCF_010206155.1__r46c1__ctg46_50		GCF_010206155.1/NZ_VIQR01000010.region001_10 # 10660 # 10800 # 1 # ID=13627_10;partial=00;start_type=ATG;rbs_motif=AGGAG;rbs_spacer=5-10bp;gc_cont=0.277	Y
[Clostridium]_cocleatum_I50_GCF_010206155.1	Firmicutes	Erysipelotrichia	Erysipelotrichales	Erysipelotrichaceae	Erysipelatoclostridium	r6c1	cyclic-lactone-autoinducer	NZ_VIQR01000011.region001.gbk	41877	62446	20570	20	41876	62446	[Clostridium]_cocleatum_I50_GCF_010206155.1__r6c1__ctg6_40				N
[Clostridium]_cocleatum_IMSAGC_017_GCF_011960505.1	Firmicutes	Erysipelotrichia	Erysipelotrichales	Erysipelotrichaceae	Erysipelatoclostridium	r123c1	cyclic-lactone-autoinducer	NZ_BLMI01000123.region001.gbk	1	1683	1683	2	0	1683	[Clostridium]_cocleatum_IMSAGC_017_GCF_011960505.1__r123c1__ctg123_2				N
[Clostridium]_cocleatum_IMSAGC_017_GCF_011960505.1	Firmicutes	Erysipelotrichia	Erysipelotrichales	Erysipelotrichaceae	Erysipelatoclostridium	r280c1	cyclic-lactone-autoinducer	NZ_BLMI01000280.region001.gbk	1	11305	11305	11	0	11305	[Clostridium]_cocleatum_IMSAGC_017_GCF_011960505.1__r280c1__ctg280_4	[Clostridium]_cocleatum_IMSAGC_017_GCF_011960505.1__r280c1__ctg280_5		GCF_011960505.1/NZ_BLMI01000280.region001_5 # 3399 # 3539 # 1 # ID=14428_5;partial=00;start_type=ATG;rbs_motif=AGGAG;rbs_spacer=5-10bp;gc_cont=0.284	Y
[Clostridium]_cocleatum_IMSAGC_017_GCF_011960505.1	Firmicutes	Erysipelotrichia	Erysipelotrichales	Erysipelotrichaceae	Erysipelatoclostridium	r297c1	cyclic-lactone-autoinducer	NZ_BLMI01000297.region001.gbk	41529	53908	12380	16	41528	53908	[Clostridium]_cocleatum_IMSAGC_017_GCF_011960505.1__r297c1__ctg297_50	[Clostridium]_cocleatum_IMSAGC_017_GCF_011960505.1__r297c1__ctg297_49		GCF_011960505.1/NZ_BLMI01000297.region001_12 # 10001 # 10135 # -1 # ID=14429_12;partial=00;start_type=ATG;rbs_motif=AGGAG;rbs_spacer=5-10bp;gc_cont=0.289	Y
[Clostridium]_dakarense_FF1_GCF_000499525.1	Firmicutes	Clostridia	Eubacteriales	Peptostreptococcaceae	Romboutsia	r126c1	cyclic-lactone-autoinducer	NZ_HG529356.1.region001.gbk	164	20793	20630	16	163	20793	[Clostridium]_dakarense_FF1_GCF_000499525.1__r126c1__ctg126_10				N
[Clostridium]_dakarense_FF1_GCF_000499525.1	Firmicutes	Clostridia	Eubacteriales	Peptostreptococcaceae	Romboutsia	r6c1	cyclic-lactone-autoinducer	NZ_HG529229.1.region001.gbk	41439	57645	16207	18	41438	57645	[Clostridium]_dakarense_FF1_GCF_000499525.1__r6c1__ctg6_44	[Clostridium]_dakarense_FF1_GCF_000499525.1__r6c1__ctg6_45		GCF_000499525.1/NZ_HG529229.1.region001_14 # 10738 # 10857 # 1 # ID=14481_14;partial=00;start_type=ATG;rbs_motif=AGxAGG/AGGxGG;rbs_spacer=5-10bp;gc_cont=0.325	Y
[Clostridium]_dakarense_MGYG-HGUT-01460_GCF_902375215.1	Firmicutes	Clostridia	Eubacteriales	Peptostreptococcaceae	Romboutsia	r126c1	cyclic-lactone-autoinducer	c00126_NZ_CABK...region001.gbk	164	20793	20630	16	163	20793	[Clostridium]_dakarense_MGYG-HGUT-01460_GCF_902375215.1__r126c1__ctg126_10				N
[Clostridium]_dakarense_MGYG-HGUT-01460_GCF_902375215.1	Firmicutes	Clostridia	Eubacteriales	Peptostreptococcaceae	Romboutsia	r6c1	cyclic-lactone-autoinducer	c00006_NZ_CABK...region001.gbk	41439	57645	16207	18	41438	57645	[Clostridium]_dakarense_MGYG-HGUT-01460_GCF_902375215.1__r6c1__ctg6_44	[Clostridium]_dakarense_MGYG-HGUT-01460_GCF_902375215.1__r6c1__ctg6_45		GCF_902375215.1/c00006_NZ_CABK...region001_14 # 10738 # 10857 # 1 # ID=14482_14;partial=00;start_type=ATG;rbs_motif=AGxAGG/AGGxGG;rbs_spacer=5-10bp;gc_cont=0.325	Y
[Clostridium]_fimetarium_DSM_9179_GCF_900111235.1	Firmicutes	Clostridia	Eubacteriales	Lachnospiraceae	Lachnoclostridium	r10c1	cyclic-lactone-autoinducer	NZ_FOJI01000002.region001.gbk	2391	22990	20600	15	2390	22990	[Clostridium]_fimetarium_DSM_9179_GCF_900111235.1__r10c1__ctg10_10				N
[Clostridium]_fimetarium_DSM_9179_GCF_900111235.1	Firmicutes	Clostridia	Eubacteriales	Lachnospiraceae	Lachnoclostridium	r24c1	cyclic-lactone-autoinducer	NZ_FOJI01000005.region001.gbk	12946	33841	20896	21	12945	33841	[Clostridium]_fimetarium_DSM_9179_GCF_900111235.1__r24c1__ctg24_26	[Clostridium]_fimetarium_DSM_9179_GCF_900111235.1__r24c1__ctg24_27		GCF_900111235.1/NZ_FOJI01000005.region001_13 # 10768 # 10896 # 1 # ID=14484_13;partial=00;start_type=ATG;rbs_motif=AGGAG;rbs_spacer=5-10bp;gc_cont=0.310	Y
[Clostridium]_fimetarium_DSM_9179_GCF_900111235.1	Firmicutes	Clostridia	Eubacteriales	Lachnospiraceae	Lachnoclostridium	r3c1	cyclic-lactone-autoinducer	NZ_FOJI01000017.region001.gbk	38044	58764	20721	16	38043	58764	[Clostridium]_fimetarium_DSM_9179_GCF_900111235.1__r3c1__ctg3_38	[Clostridium]_fimetarium_DSM_9179_GCF_900111235.1__r3c1__ctg3_39			Y
[Clostridium]_indolis_DSM_755_GCF_000526995.1	Firmicutes	Clostridia	Eubacteriales	Lachnospiraceae	Lacrimispora	r1c1	cyclic-lactone-autoinducer	NZ_AZUI01000001.region001.gbk	56585	76203	19619	20	56584	76203	[Clostridium]_indolis_DSM_755_GCF_000526995.1__r1c1__ctg1_61	[Clostridium]_indolis_DSM_755_GCF_000526995.1__r1c1__ctg1_62		GCF_000526995.1/NZ_AZUI01000001.region001_11 # 10212 # 10361 # -1 # ID=14491_11;partial=00;start_type=ATG;rbs_motif=AGGAGG;rbs_spacer=5-10bp;gc_cont=0.300	Y
[Clostridium]_indolis_DSM_755_GCF_000526995.1	Firmicutes	Clostridia	Eubacteriales	Lachnospiraceae	Lacrimispora	r1c3	cyclic-lactone-autoinducer	NZ_AZUI01000001.region003.gbk	2660185	2678455	18271	19	2660184	2678455	[Clostridium]_indolis_DSM_755_GCF_000526995.1__r1c3__ctg1_2360	[Clostridium]_indolis_DSM_755_GCF_000526995.1__r1c3__ctg1_2361		GCF_000526995.1/NZ_AZUI01000001.region003_11 # 9758 # 9907 # -1 # ID=14492_11;partial=00;start_type=ATG;rbs_motif=AGGA/GGAG/GAGG;rbs_spacer=11-12bp;gc_cont=0.333	Y
[Clostridium]_indolis_DSM_755_GCF_000526995.1	Firmicutes	Clostridia	Eubacteriales	Lachnospiraceae	Lacrimispora	r1c5	cyclic-lactone-autoinducer	NZ_AZUI01000001.region005.gbk	3424625	3444480	19856	22	3424624	3444480	[Clostridium]_indolis_DSM_755_GCF_000526995.1__r1c5__ctg1_3021	[Clostridium]_indolis_DSM_755_GCF_000526995.1__r1c5__ctg1_3024		GCF_000526995.1/NZ_AZUI01000001.region005_14 # 12302 # 12445 # 1 # ID=14493_14;partial=00;start_type=ATG;rbs_motif=AGGAGG;rbs_spacer=5-10bp;gc_cont=0.347	Y
[Clostridium]_indolis_DSM_755_GCF_000526995.1	Firmicutes	Clostridia	Eubacteriales	Lachnospiraceae	Lacrimispora	r1c6	cyclic-lactone-autoinducer	NZ_AZUI01000001.region006.gbk	5141127	5161693	20567	20	5141126	5161693	[Clostridium]_indolis_DSM_755_GCF_000526995.1__r1c6__ctg1_4620				N
[Clostridium]_innocuum_1001285H_161024_B5_GCF_015550705.1	Firmicutes	Erysipelotrichia	Erysipelotrichales	Erysipelotrichaceae	Erysipelatoclostridium	r31c1	cyclic-lactone-autoinducer	c00031_NZ_JADN...region001.gbk	4944	25501	20558	19	4943	25501	[Clostridium]_innocuum_1001285H_161024_B5_GCF_015550705.1__r31c1__ctg31_18				N
[Clostridium]_innocuum_2789STDY5834853_GCF_001406695.1	Firmicutes	Erysipelotrichia	Erysipelotrichales	Erysipelotrichaceae	Erysipelatoclostridium	r2c1	cyclic-lactone-autoinducer	NZ_CZBW01000002.region001.gbk	181463	202020	20558	17	181462	202020	[Clostridium]_innocuum_2789STDY5834853_GCF_001406695.1__r2c1__ctg2_176				N
[Clostridium]_innocuum_2959_GCF_000371425.1	Firmicutes	Erysipelotrichia	Erysipelotrichales	Erysipelotrichaceae	Erysipelatoclostridium	r1c1	cyclic-lactone-autoinducer	NZ_KB850943.1.region001.gbk	738138	758695	20558	17	738137	758695	[Clostridium]_innocuum_2959_GCF_000371425.1__r1c1__ctg1_740				N
[Clostridium]_innocuum_2959_GCF_002814255.1	Firmicutes	Erysipelotrichia	Erysipelotrichales	Erysipelotrichaceae	Erysipelatoclostridium	r1c1	cyclic-lactone-autoinducer	NZ_NXNK01000003.region001.gbk	2774575	2795111	20537	18	2774574	2795111	[Clostridium]_innocuum_2959_GCF_002814255.1__r1c1__ctg1_2704				N
[Clostridium]_innocuum_4928STDY7387913_GCF_902166105.1	Firmicutes	Erysipelotrichia	Erysipelotrichales	Erysipelotrichaceae	Erysipelatoclostridium	r2c1	cyclic-lactone-autoinducer	c00002_NZ_CABH...region001.gbk	225466	246023	20558	17	225465	246023	[Clostridium]_innocuum_4928STDY7387913_GCF_902166105.1__r2c1__ctg2_232				N
[Clostridium]_innocuum_4928STDY7387914_GCF_902166045.1	Firmicutes	Erysipelotrichia	Erysipelotrichales	Erysipelotrichaceae	Erysipelatoclostridium	r2c1	cyclic-lactone-autoinducer	c00002_NZ_CABH...region001.gbk	225452	246009	20558	17	225451	246009	[Clostridium]_innocuum_4928STDY7387914_GCF_902166045.1__r2c1__ctg2_233				N
[Clostridium]_innocuum_AF18-35LB_GCF_003459885.1	Firmicutes	Erysipelotrichia	Erysipelotrichales	Erysipelotrichaceae	Erysipelatoclostridium	r1c1	cyclic-lactone-autoinducer	NZ_QRXA01000001.region001.gbk	305587	326144	20558	17	305586	326144	[Clostridium]_innocuum_AF18-35LB_GCF_003459885.1__r1c1__ctg1_308				N
[Clostridium]_innocuum_AN88_GCF_000763955.1	Firmicutes	Erysipelotrichia	Erysipelotrichales	Erysipelotrichaceae	Erysipelatoclostridium	r23c1	cyclic-lactone-autoinducer	NZ_JQIF01000023.region001.gbk	5165	25722	20558	21	5164	25722	[Clostridium]_innocuum_AN88_GCF_000763955.1__r23c1__ctg23_14				N
[Clostridium]_innocuum_ATCC_14501_GCF_012317185.1	Firmicutes	Erysipelotrichia	Erysipelotrichales	Erysipelotrichaceae	Erysipelatoclostridium	r1c1	cyclic-lactone-autoinducer	NZ_CP048838.1.region001.gbk	4483914	4504471	20558	18	4483913	4504471	[Clostridium]_innocuum_ATCC_14501_GCF_012317185.1__r1c1__ctg1_4352				N
[Clostridium]_innocuum_ATCC_14501_GCF_018458805.1	Firmicutes	Erysipelotrichia	Erysipelotrichales	Erysipelotrichaceae	Erysipelatoclostridium	r15c1	cyclic-lactone-autoinducer	c00015_NZ_JAGG...region001.gbk	5304	25861	20558	19	5303	25861	[Clostridium]_innocuum_ATCC_14501_GCF_018458805.1__r15c1__ctg15_17				N
[Clostridium]_innocuum_BIOML-A1_GCF_009876415.1	Firmicutes	Erysipelotrichia	Erysipelotrichales	Erysipelotrichaceae	Erysipelatoclostridium	r52c1	cyclic-lactone-autoinducer	NZ_WWTY01000055.region001.gbk	1923	22459	20537	21	1922	22459	[Clostridium]_innocuum_BIOML-A1_GCF_009876415.1__r52c1__ctg52_14				N
[Clostridium]_innocuum_BIOML-A10_GCF_009874135.1	Firmicutes	Erysipelotrichia	Erysipelotrichales	Erysipelotrichaceae	Erysipelatoclostridium	r50c1	cyclic-lactone-autoinducer	NZ_WWTP01000055.region001.gbk	1923	22459	20537	21	1922	22459	[Clostridium]_innocuum_BIOML-A10_GCF_009874135.1__r50c1__ctg50_14				N
[Clostridium]_innocuum_BIOML-A11_GCF_009874145.1	Firmicutes	Erysipelotrichia	Erysipelotrichales	Erysipelotrichaceae	Erysipelatoclostridium	r47c1	cyclic-lactone-autoinducer	NZ_WWTO01000052.region001.gbk	1923	22459	20537	21	1922	22459	[Clostridium]_innocuum_BIOML-A11_GCF_009874145.1__r47c1__ctg47_14				N
[Clostridium]_innocuum_BIOML-A12_GCF_009874055.1	Firmicutes	Erysipelotrichia	Erysipelotrichales	Erysipelotrichaceae	Erysipelatoclostridium	r47c1	cyclic-lactone-autoinducer	NZ_WWTN01000052.region001.gbk	1923	22459	20537	21	1922	22459	[Clostridium]_innocuum_BIOML-A12_GCF_009874055.1__r47c1__ctg47_14				N
[Clostridium]_innocuum_BIOML-A13_GCF_009874095.1	Firmicutes	Erysipelotrichia	Erysipelotrichales	Erysipelotrichaceae	Erysipelatoclostridium	r52c1	cyclic-lactone-autoinducer	NZ_WWTM01000057.region001.gbk	1923	22459	20537	21	1922	22459	[Clostridium]_innocuum_BIOML-A13_GCF_009874095.1__r52c1__ctg52_14				N
[Clostridium]_innocuum_BIOML-A2_GCF_009876425.1	Firmicutes	Erysipelotrichia	Erysipelotrichales	Erysipelotrichaceae	Erysipelatoclostridium	r52c1	cyclic-lactone-autoinducer	NZ_WWTX01000053.region001.gbk	1923	22459	20537	20	1922	22459	[Clostridium]_innocuum_BIOML-A2_GCF_009876425.1__r52c1__ctg52_14				N
[Clostridium]_innocuum_BIOML-A4_GCF_009874205.1	Firmicutes	Erysipelotrichia	Erysipelotrichales	Erysipelotrichaceae	Erysipelatoclostridium	r55c1	cyclic-lactone-autoinducer	NZ_WWTV01000056.region001.gbk	1923	22459	20537	21	1922	22459	[Clostridium]_innocuum_BIOML-A4_GCF_009874205.1__r55c1__ctg55_14				N
[Clostridium]_innocuum_BIOML-A5_GCF_009876375.1	Firmicutes	Erysipelotrichia	Erysipelotrichales	Erysipelotrichaceae	Erysipelatoclostridium	r55c1	cyclic-lactone-autoinducer	NZ_WWTU01000058.region001.gbk	1923	22459	20537	20	1922	22459	[Clostridium]_innocuum_BIOML-A5_GCF_009876375.1__r55c1__ctg55_14				N
[Clostridium]_innocuum_BIOML-A6_GCF_009874155.1	Firmicutes	Erysipelotrichia	Erysipelotrichales	Erysipelotrichaceae	Erysipelatoclostridium	r58c1	cyclic-lactone-autoinducer	NZ_WWTT01000055.region001.gbk	1923	22459	20537	20	1922	22459	[Clostridium]_innocuum_BIOML-A6_GCF_009874155.1__r58c1__ctg58_14				N
[Clostridium]_innocuum_BIOML-A7_GCF_009874195.1	Firmicutes	Erysipelotrichia	Erysipelotrichales	Erysipelotrichaceae	Erysipelatoclostridium	r64c1	cyclic-lactone-autoinducer	NZ_WWTS01000057.region001.gbk	1923	22459	20537	20	1922	22459	[Clostridium]_innocuum_BIOML-A7_GCF_009874195.1__r64c1__ctg64_14				N
[Clostridium]_innocuum_BIOML-A8_GCF_009876385.1	Firmicutes	Erysipelotrichia	Erysipelotrichales	Erysipelotrichaceae	Erysipelatoclostridium	r48c1	cyclic-lactone-autoinducer	NZ_WWTR01000053.region001.gbk	1923	22459	20537	20	1922	22459	[Clostridium]_innocuum_BIOML-A8_GCF_009876385.1__r48c1__ctg48_14				N
[Clostridium]_innocuum_BIOML-A9_GCF_009876345.1	Firmicutes	Erysipelotrichia	Erysipelotrichales	Erysipelotrichaceae	Erysipelatoclostridium	r50c1	cyclic-lactone-autoinducer	NZ_WWTQ01000054.region001.gbk	1923	22459	20537	21	1922	22459	[Clostridium]_innocuum_BIOML-A9_GCF_009876345.1__r50c1__ctg50_14				N
[Clostridium]_innocuum_BSM-380-WT-2D_GCF_009696405.1	Firmicutes	Erysipelotrichia	Erysipelotrichales	Erysipelotrichaceae	Erysipelatoclostridium	r40c1	cyclic-lactone-autoinducer	NZ_VUMA01000007.region001.gbk	23808	44344	20537	18	23807	44344	[Clostridium]_innocuum_BSM-380-WT-2D_GCF_009696405.1__r40c1__ctg40_35				N
[Clostridium]_innocuum_I46_GCF_002221705.2	Firmicutes	Erysipelotrichia	Erysipelotrichales	Erysipelotrichaceae	Erysipelatoclostridium	r1c1	cyclic-lactone-autoinducer	NZ_CP022722.1.region001.gbk	3335065	3355622	20558	23	3335064	3355622	[Clostridium]_innocuum_I46_GCF_002221705.2__r1c1__ctg1_3330				N
[Clostridium]_innocuum_I46_GCF_016697325.1	Firmicutes	Erysipelotrichia	Erysipelotrichales	Erysipelotrichaceae	Erysipelatoclostridium	r1c1	cyclic-lactone-autoinducer	NZ_CP065320.1.region001.gbk	2458161	2478718	20558	23	2458160	2478718	[Clostridium]_innocuum_I46_GCF_016697325.1__r1c1__ctg1_2407				N
[Clostridium]_innocuum_LC-LUMC-CI-001_GCF_012271835.1	Firmicutes	Erysipelotrichia	Erysipelotrichales	Erysipelotrichaceae	Erysipelatoclostridium	r1c1	cyclic-lactone-autoinducer	NZ_CP048837.1.region001.gbk	4102117	4122653	20537	18	4102116	4122653	[Clostridium]_innocuum_LC-LUMC-CI-001_GCF_012271835.1__r1c1__ctg1_3969				N
[Clostridium]_innocuum_MGYG-HGUT-01396_GCF_902374605.1	Firmicutes	Erysipelotrichia	Erysipelotrichales	Erysipelotrichaceae	Erysipelatoclostridium	r1c1	cyclic-lactone-autoinducer	c00001_NZ_CABK...region001.gbk	408786	429322	20537	18	408785	429322	[Clostridium]_innocuum_MGYG-HGUT-01396_GCF_902374605.1__r1c1__ctg1_442				N
[Clostridium]_innocuum_MGYG-HGUT-01396_GCF_902374605.1	Firmicutes	Erysipelotrichia	Erysipelotrichales	Erysipelotrichaceae	Erysipelatoclostridium	r6c1	cyclic-lactone-autoinducer	c00006_NZ_CABK...region001.gbk	1	16474	16474	12	0	16474	[Clostridium]_innocuum_MGYG-HGUT-01396_GCF_902374605.1__r6c1__ctg6_7	[Clostridium]_innocuum_MGYG-HGUT-01396_GCF_902374605.1__r6c1__ctg6_8			Y
[Clostridium]_innocuum_MSK.13.34_GCF_019131515.1	Firmicutes	Erysipelotrichia	Erysipelotrichales	Erysipelotrichaceae	Erysipelatoclostridium	r57c1	cyclic-lactone-autoinducer	c00057_NZ_JAHO...region001.gbk	460	20984	20525	16	459	20984	[Clostridium]_innocuum_MSK.13.34_GCF_019131515.1__r57c1__ctg57_12				N
[Clostridium]_innocuum_MSK.13.34_GCF_019131515.1	Firmicutes	Erysipelotrichia	Erysipelotrichales	Erysipelotrichaceae	Erysipelatoclostridium	r77c1	cyclic-lactone-autoinducer	c00077_NZ_JAHO...region001.gbk	129699	150235	20537	18	129698	150235	[Clostridium]_innocuum_MSK.13.34_GCF_019131515.1__r77c1__ctg77_138				N
[Clostridium]_innocuum_MSK.15.85_GCF_019130895.1	Firmicutes	Erysipelotrichia	Erysipelotrichales	Erysipelotrichaceae	Erysipelatoclostridium	r126c1	cyclic-lactone-autoinducer	c00126_NZ_JAHO...region001.gbk	75850	96407	20558	18	75849	96407	[Clostridium]_innocuum_MSK.15.85_GCF_019130895.1__r126c1__ctg126_91				N
[Clostridium]_innocuum_MSK.5.23_GCF_019125695.1	Firmicutes	Erysipelotrichia	Erysipelotrichales	Erysipelotrichaceae	Erysipelatoclostridium	r20c1	cyclic-lactone-autoinducer	c00020_NZ_JAHO...region001.gbk	5219	25755	20537	17	5218	25755	[Clostridium]_innocuum_MSK.5.23_GCF_019125695.1__r20c1__ctg20_14				N
[Clostridium]_innocuum_MSK.6.1_GCF_019042135.1	Firmicutes	Erysipelotrichia	Erysipelotrichales	Erysipelotrichaceae	Erysipelatoclostridium	r84c1	cyclic-lactone-autoinducer	c00084_NZ_JAHP...region001.gbk	124824	145381	20558	17	124823	145381	[Clostridium]_innocuum_MSK.6.1_GCF_019042135.1__r84c1__ctg84_135				N
[Clostridium]_innocuum_MSK.7.7_GCF_019041895.1	Firmicutes	Erysipelotrichia	Erysipelotrichales	Erysipelotrichaceae	Erysipelatoclostridium	r135c1	cyclic-lactone-autoinducer	c00135_NZ_JAHP...region001.gbk	461	18457	17997	15	460	18457	[Clostridium]_innocuum_MSK.7.7_GCF_019041895.1__r135c1__ctg135_12				N
[Clostridium]_innocuum_MSK.7.7_GCF_019041895.1	Firmicutes	Erysipelotrichia	Erysipelotrichales	Erysipelotrichaceae	Erysipelatoclostridium	r54c1	cyclic-lactone-autoinducer	c00054_NZ_JAHP...region001.gbk	36055	56591	20537	18	36054	56591	[Clostridium]_innocuum_MSK.7.7_GCF_019041895.1__r54c1__ctg54_47				N
[Clostridium]_innocuum_NLAE-zl-C381_GCF_900114575.1	Firmicutes	Erysipelotrichia	Erysipelotrichales	Erysipelotrichaceae	Erysipelatoclostridium	r38c1	cyclic-lactone-autoinducer	NZ_FOTN01000004.region001.gbk	14967	35524	20558	17	14966	35524	[Clostridium]_innocuum_NLAE-zl-C381_GCF_900114575.1__r38c1__ctg38_25				N
[Clostridium]_innocuum_NLAE-zl-G197_GCF_003149285.1	Firmicutes	Erysipelotrichia	Erysipelotrichales	Erysipelotrichaceae	Erysipelatoclostridium	r1c1	cyclic-lactone-autoinducer	NZ_QGDK01000001.region001.gbk	745777	766334	20558	17	745776	766334	[Clostridium]_innocuum_NLAE-zl-G197_GCF_003149285.1__r1c1__ctg1_704				N
[Clostridium]_innocuum_NLAE-zl-G197_GCF_900116735.1	Firmicutes	Erysipelotrichia	Erysipelotrichales	Erysipelotrichaceae	Erysipelatoclostridium	r23c1	cyclic-lactone-autoinducer	NZ_UETA01000001.region001.gbk	745777	766334	20558	17	745776	766334	[Clostridium]_innocuum_NLAE-zl-G197_GCF_900116735.1__r23c1__ctg23_704				N
[Clostridium]_innocuum_NZ_Clostridium_innocuum_9H7_BL_hyb_GCF_903181455.1	Firmicutes	Erysipelotrichia	Erysipelotrichales	Erysipelotrichaceae	Erysipelatoclostridium	r1c1	cyclic-lactone-autoinducer	c00001_NZ_CAEU...region001.gbk	1612494	1633030	20537	18	1612493	1633030	[Clostridium]_innocuum_NZ_Clostridium_innocuum_9H7_BL_hyb_GCF_903181455.1__r1c1__ctg1_1589				N
[Clostridium]_innocuum_OF01-2LB_GCF_003433985.1	Firmicutes	Erysipelotrichia	Erysipelotrichales	Erysipelotrichaceae	Erysipelatoclostridium	r37c1	cyclic-lactone-autoinducer	NZ_QVEV01000015.region001.gbk	88538	101169	12632	12	88537	101169	[Clostridium]_innocuum_OF01-2LB_GCF_003433985.1__r37c1__ctg37_95				N
[Clostridium]_methoxybenzovorans_SR3_GCF_000421505.1	Firmicutes	Clostridia	Eubacteriales	Lachnospiraceae	Lachnoclostridium	r6c1	cyclic-lactone-autoinducer	NZ_ATXD01000006.region001.gbk	844386	866616	22231	25	844385	866616	[Clostridium]_methoxybenzovorans_SR3_GCF_000421505.1__r6c1__ctg6_742	[Clostridium]_methoxybenzovorans_SR3_GCF_000421505.1__r6c1__ctg6_736		GCF_000421505.1/NZ_ATXD01000006.region001_9 # 7412 # 7555 # -1 # ID=14725_9;partial=00;start_type=ATG;rbs_motif=AGGAGG;rbs_spacer=5-10bp;gc_cont=0.354	Y
[Clostridium]_methoxybenzovorans_SR3_GCF_000421505.1	Firmicutes	Clostridia	Eubacteriales	Lachnospiraceae	Lachnoclostridium	r6c3	cyclic-lactone-autoinducer	NZ_ATXD01000006.region003.gbk	1701880	1722621	20742	19	1701879	1722621	[Clostridium]_methoxybenzovorans_SR3_GCF_000421505.1__r6c3__ctg6_1500	[Clostridium]_methoxybenzovorans_SR3_GCF_000421505.1__r6c3__ctg6_1499		GCF_000421505.1/NZ_ATXD01000006.region003_11 # 10004 # 10153 # 1 # ID=14726_11;partial=00;start_type=ATG;rbs_motif=AGGA/GGAG/GAGG;rbs_spacer=11-12bp;gc_cont=0.327	Y
[Clostridium]_methoxybenzovorans_SR3_GCF_000421505.1	Firmicutes	Clostridia	Eubacteriales	Lachnospiraceae	Lachnoclostridium	r7c1	cyclic-lactone-autoinducer	NZ_ATXD01000007.region001.gbk	1238335	1258760	20426	22	1238334	1258760	[Clostridium]_methoxybenzovorans_SR3_GCF_000421505.1__r7c1__ctg7_1206				N
[Clostridium]_methoxybenzovorans_SR3_GCF_000421505.1	Firmicutes	Clostridia	Eubacteriales	Lachnospiraceae	Lachnoclostridium	r8c2	cyclic-lactone-autoinducer	NZ_ATXD01000008.region002.gbk	725553	746278	20726	20	725552	746278	[Clostridium]_methoxybenzovorans_SR3_GCF_000421505.1__r8c2__ctg8_654	[Clostridium]_methoxybenzovorans_SR3_GCF_000421505.1__r8c2__ctg8_653		GCF_000421505.1/NZ_ATXD01000008.region002_10 # 10001 # 10150 # 1 # ID=14727_10;partial=00;start_type=ATG;rbs_motif=AGGAGG;rbs_spacer=5-10bp;gc_cont=0.300	Y
[Clostridium]_polysaccharolyticum_DSM_1801_GCF_900111595.1	Firmicutes	Clostridia	Eubacteriales	Lachnospiraceae	Lachnoclostridium	r18c1	RiPP-like,cyclic-lactone-autoinducer,other	NZ_FOHN01000012.region001.gbk	12078	72017	59940	55	45939	66101		[Clostridium]_polysaccharolyticum_DSM_1801_GCF_900111595.1__r18c1__ctg18_54			Y
[Clostridium]_polysaccharolyticum_DSM_1801_GCF_900111595.1	Firmicutes	Clostridia	Eubacteriales	Lachnospiraceae	Lachnoclostridium	r24c1	cyclic-lactone-autoinducer	NZ_FOHN01000033.region001.gbk	1	18861	18861	15	0	18861	[Clostridium]_polysaccharolyticum_DSM_1801_GCF_900111595.1__r24c1__ctg24_9				N
[Clostridium]_polysaccharolyticum_DSM_1801_GCF_900111595.1	Firmicutes	Clostridia	Eubacteriales	Lachnospiraceae	Lachnoclostridium	r29c1	cyclic-lactone-autoinducer	NZ_FOHN01000008.region001.gbk	21305	41448	20144	23	21304	41448		[Clostridium]_polysaccharolyticum_DSM_1801_GCF_900111595.1__r29c1__ctg29_26			Y
[Clostridium]_polysaccharolyticum_DSM_1801_GCF_900111595.1	Firmicutes	Clostridia	Eubacteriales	Lachnospiraceae	Lachnoclostridium	r38c1	cyclic-lactone-autoinducer	NZ_FOHN01000002.region001.gbk	37811	57930	20120	27	37810	57930		[Clostridium]_polysaccharolyticum_DSM_1801_GCF_900111595.1__r38c1__ctg38_67			Y
[Clostridium]_polysaccharolyticum_DSM_1801_GCF_900111595.1	Firmicutes	Clostridia	Eubacteriales	Lachnospiraceae	Lachnoclostridium	r8c2	LAP,RiPP-like,cyclic-lactone-autoinducer	NZ_FOHN01000003.region002.gbk	28938	60401	31464	30	39697	60401	[Clostridium]_polysaccharolyticum_DSM_1801_GCF_900111595.1__r8c2__ctg8_49	[Clostridium]_polysaccharolyticum_DSM_1801_GCF_900111595.1__r8c2__ctg8_50		GCF_900111595.1/NZ_FOHN01000003.region002_23 # 21303 # 21464 # 1 # ID=18951_23;partial=00;start_type=ATG;rbs_motif=GGAG/GAGG;rbs_spacer=5-10bp;gc_cont=0.358	Y
[Clostridium]_populeti_743A_GCF_900112775.1	Firmicutes	Clostridia	Eubacteriales	Lachnospiraceae	Lachnoclostridium	r14c1	cyclic-lactone-autoinducer	NZ_FOYZ01000023.region001.gbk	2043	22216	20174	27	2042	22216		[Clostridium]_populeti_743A_GCF_900112775.1__r14c1__ctg14_15			Y
[Clostridium]_populeti_743A_GCF_900112775.1	Firmicutes	Clostridia	Eubacteriales	Lachnospiraceae	Lachnoclostridium	r17c1	cyclic-lactone-autoinducer	NZ_FOYZ01000028.region001.gbk	1	12275	12275	15	0	12275		[Clostridium]_populeti_743A_GCF_900112775.1__r17c1__ctg17_12			Y
[Clostridium]_populeti_743A_GCF_900112775.1	Firmicutes	Clostridia	Eubacteriales	Lachnospiraceae	Lachnoclostridium	r18c1	cyclic-lactone-autoinducer	NZ_FOYZ01000009.region001.gbk	123037	143630	20594	22	123036	143630	[Clostridium]_populeti_743A_GCF_900112775.1__r18c1__ctg18_108				N
[Clostridium]_populeti_743A_GCF_900112775.1	Firmicutes	Clostridia	Eubacteriales	Lachnospiraceae	Lachnoclostridium	r19c2	cyclic-lactone-autoinducer	NZ_FOYZ01000004.region002.gbk	275087	295224	20138	19	275086	295224		[Clostridium]_populeti_743A_GCF_900112775.1__r19c2__ctg19_209			Y
[Clostridium]_populeti_743A_GCF_900112775.1	Firmicutes	Clostridia	Eubacteriales	Lachnospiraceae	Lachnoclostridium	r22c1	cyclic-lactone-autoinducer,ranthipeptide	NZ_FOYZ01000003.region001.gbk	247063	285473	38411	33	261997	285473		[Clostridium]_populeti_743A_GCF_900112775.1__r22c1__ctg22_232::[Clostridium]_populeti_743A_GCF_900112775.1__r22c1__ctg22_236			Y
[Clostridium]_populeti_743A_GCF_900112775.1	Firmicutes	Clostridia	Eubacteriales	Lachnospiraceae	Lachnoclostridium	r26c1	cyclic-lactone-autoinducer	NZ_FOYZ01000006.region001.gbk	68043	86861	18819	19	68042	86861		[Clostridium]_populeti_743A_GCF_900112775.1__r26c1__ctg26_76			Y
[Clostridium]_populeti_743A_GCF_900112775.1	Firmicutes	Clostridia	Eubacteriales	Lachnospiraceae	Lachnoclostridium	r26c2	RiPP-like,cyclic-lactone-autoinducer	NZ_FOYZ01000006.region002.gbk	118400	138543	20144	21	118399	138543		[Clostridium]_populeti_743A_GCF_900112775.1__r26c2__ctg26_120			Y
[Clostridium]_populeti_743A_GCF_900112775.1	Firmicutes	Clostridia	Eubacteriales	Lachnospiraceae	Lachnoclostridium	r31c1	cyclic-lactone-autoinducer	NZ_FOYZ01000008.region001.gbk	114637	135224	20588	17	114636	135224	[Clostridium]_populeti_743A_GCF_900112775.1__r31c1__ctg31_116			GCF_900112775.1/NZ_FOYZ01000008.region001_12 # 9874 # 10017 # -1 # ID=19432_12;partial=00;start_type=ATG;rbs_motif=AGxAGG/AGGxGG;rbs_spacer=5-10bp;gc_cont=0.306	Y
[Clostridium]_populeti_743A_GCF_900112775.1	Firmicutes	Clostridia	Eubacteriales	Lachnospiraceae	Lachnoclostridium	r32c1	NRPS,NRPS-like,T1PKS,cyclic-lactone-autoinducer,transAT-PKS	NZ_FOYZ01000016.region001.gbk	12560	78917	66358	41	58776	78917		[Clostridium]_populeti_743A_GCF_900112775.1__r32c1__ctg32_43			Y
[Clostridium]_populeti_743A_GCF_900112775.1	Firmicutes	Clostridia	Eubacteriales	Lachnospiraceae	Lachnoclostridium	r36c2	cyclic-lactone-autoinducer	NZ_FOYZ01000005.region002.gbk	154835	173649	18815	16	154834	173649		[Clostridium]_populeti_743A_GCF_900112775.1__r36c2__ctg36_129			Y
[Clostridium]_populeti_743A_GCF_900112775.1	Firmicutes	Clostridia	Eubacteriales	Lachnospiraceae	Lachnoclostridium	r36c3	cyclic-lactone-autoinducer	NZ_FOYZ01000005.region003.gbk	260660	280803	20144	17	260659	280803		[Clostridium]_populeti_743A_GCF_900112775.1__r36c3__ctg36_245			Y
[Clostridium]_populeti_743A_GCF_900112775.1	Firmicutes	Clostridia	Eubacteriales	Lachnospiraceae	Lachnoclostridium	r38c1	cyclic-lactone-autoinducer	NZ_FOYZ01000015.region001.gbk	70399	88947	18549	19	70398	88947		[Clostridium]_populeti_743A_GCF_900112775.1__r38c1__ctg38_77			Y
[Clostridium]_saccharogumia_DSM_17460_GCF_000686665.1	Firmicutes	Erysipelotrichia	Erysipelotrichales	Erysipelotrichaceae	Erysipelatoclostridium	r32c1	NRPS,cyclic-lactone-autoinducer	NZ_JMLH01000033.region001.gbk	1	22189	22189	13	0	18048	[Clostridium]_saccharogumia_DSM_17460_GCF_000686665.1__r32c1__ctg32_7	[Clostridium]_saccharogumia_DSM_17460_GCF_000686665.1__r32c1__ctg32_8		GCF_000686665.1/NZ_JMLH01000033.region001_7 # 7893 # 8048 # -1 # ID=19751_7;partial=00;start_type=ATG;rbs_motif=AAAA;rbs_spacer=3bp;gc_cont=0.365	Y
[Clostridium]_saccharogumia_DSM_17460_GCF_000686665.1	Firmicutes	Erysipelotrichia	Erysipelotrichales	Erysipelotrichaceae	Erysipelatoclostridium	r5c1	cyclic-lactone-autoinducer	NZ_JMLH01000005.region001.gbk	16132	36701	20570	19	16131	36701	[Clostridium]_saccharogumia_DSM_17460_GCF_000686665.1__r5c1__ctg5_27				N
[Clostridium]_saccharogumia_MGYG-HGUT-01697_GCF_902377525.1	Firmicutes	Erysipelotrichia	Erysipelotrichales	Erysipelotrichaceae	Erysipelatoclostridium	r32c1	NRPS,cyclic-lactone-autoinducer	c00032_NZ_CABL...region001.gbk	1	22189	22189	13	0	18048	[Clostridium]_saccharogumia_MGYG-HGUT-01697_GCF_902377525.1__r32c1__ctg32_7	[Clostridium]_saccharogumia_MGYG-HGUT-01697_GCF_902377525.1__r32c1__ctg32_8		GCF_902377525.1/c00032_NZ_CABL...region001_7 # 7893 # 8048 # -1 # ID=20369_7;partial=00;start_type=ATG;rbs_motif=AAAA;rbs_spacer=3bp;gc_cont=0.365	Y
[Clostridium]_saccharogumia_MGYG-HGUT-01697_GCF_902377525.1	Firmicutes	Erysipelotrichia	Erysipelotrichales	Erysipelotrichaceae	Erysipelatoclostridium	r5c1	cyclic-lactone-autoinducer	c00005_NZ_CABL...region001.gbk	16132	36701	20570	19	16131	36701	[Clostridium]_saccharogumia_MGYG-HGUT-01697_GCF_902377525.1__r5c1__ctg5_27				N
[Clostridium]_saccharolyticum_WM1_GCF_000144625.1	Firmicutes	Clostridia	Eubacteriales	Lachnospiraceae	Lacrimispora	r1c2	cyclic-lactone-autoinducer	NC_014376.1.region002.gbk	2082442	2100904	18463	19	2082441	2100904	[Clostridium]_saccharolyticum_WM1_GCF_000144625.1__r1c2__ctg1_1914			GCF_000144625.1/NC_014376.1.region002_10 # 9364 # 9510 # 1 # ID=20868_10;partial=00;start_type=ATG;rbs_motif=GGA/GAG/AGG;rbs_spacer=5-10bp;gc_cont=0.361	Y
[Clostridium]_saccharolyticum_WM1_GCF_000144625.1	Firmicutes	Clostridia	Eubacteriales	Lachnospiraceae	Lacrimispora	r1c3	cyclic-lactone-autoinducer	NC_014376.1.region003.gbk	2666600	2687339	20740	15	2666599	2687339	[Clostridium]_saccharolyticum_WM1_GCF_000144625.1__r1c3__ctg1_2458	[Clostridium]_saccharolyticum_WM1_GCF_000144625.1__r1c3__ctg1_2459		GCF_000144625.1/NC_014376.1.region003_10 # 10597 # 10740 # -1 # ID=20869_10;partial=00;start_type=ATG;rbs_motif=AGGAGG;rbs_spacer=5-10bp;gc_cont=0.410	Y
[Clostridium]_scindens_GGCC_0168_GCF_017565985.1	Firmicutes	Clostridia	Eubacteriales	Lachnospiraceae	Lachnoclostridium	r16c1	cyclic-lactone-autoinducer	c00016_NZ_JABF...region001.gbk	24353	45110	20758	19	24352	45110	[Clostridium]_scindens_GGCC_0168_GCF_017565985.1__r16c1__ctg16_22	[Clostridium]_scindens_GGCC_0168_GCF_017565985.1__r16c1__ctg16_21		GCF_017565985.1/c00016_NZ_JABF...region001_9 # 10001 # 10159 # 1 # ID=20870_9;partial=00;start_type=ATG;rbs_motif=AGGAGG;rbs_spacer=5-10bp;gc_cont=0.415	Y
[Clostridium]_scindens_MSK.5.24_GCF_013304085.1	Firmicutes	Clostridia	Eubacteriales	Lachnospiraceae	Lachnoclostridium	r14c2	cyclic-lactone-autoinducer,ranthipeptide	c00014_NZ_JAAI...region002.gbk	468298	500399	32102	28	479690	500399	[Clostridium]_scindens_MSK.5.24_GCF_013304085.1__r14c2__ctg14_433	[Clostridium]_scindens_MSK.5.24_GCF_013304085.1__r14c2__ctg14_434		GCF_013304085.1/c00014_NZ_JAAI...region002_23 # 21950 # 22102 # -1 # ID=22013_23;partial=00;start_type=ATG;rbs_motif=AGGAG;rbs_spacer=5-10bp;gc_cont=0.373	Y
[Clostridium]_sphenoides_JCM_1415_ATCC_19403_GCF_900105615.1	Firmicutes	Clostridia	Eubacteriales	Lachnospiraceae	Lacrimispora	r1c1	cyclic-lactone-autoinducer	NZ_LT630003.1.region001.gbk	450108	468723	18616	21	450107	468723	[Clostridium]_sphenoides_JCM_1415_ATCC_19403_GCF_900105615.1__r1c1__ctg1_398	[Clostridium]_sphenoides_JCM_1415_ATCC_19403_GCF_900105615.1__r1c1__ctg1_397		GCF_900105615.1/NZ_LT630003.1.region001_11 # 9764 # 9925 # 1 # ID=22030_11;partial=00;start_type=ATG;rbs_motif=AGxAGG/AGGxGG;rbs_spacer=5-10bp;gc_cont=0.407	Y
[Clostridium]_sphenoides_JCM_1415_ATCC_19403_GCF_900105615.1	Firmicutes	Clostridia	Eubacteriales	Lachnospiraceae	Lacrimispora	r1c2	cyclic-lactone-autoinducer	NZ_LT630003.1.region002.gbk	1570289	1590280	19992	21	1570288	1590280	[Clostridium]_sphenoides_JCM_1415_ATCC_19403_GCF_900105615.1__r1c2__ctg1_1393				N
[Clostridium]_sphenoides_JCM_1415_ATCC_19403_GCF_900105615.1	Firmicutes	Clostridia	Eubacteriales	Lachnospiraceae	Lacrimispora	r1c4	cyclic-lactone-autoinducer	NZ_LT630003.1.region004.gbk	3788762	3809531	20770	18	3788761	3809531	[Clostridium]_sphenoides_JCM_1415_ATCC_19403_GCF_900105615.1__r1c4__ctg1_3398	[Clostridium]_sphenoides_JCM_1415_ATCC_19403_GCF_900105615.1__r1c4__ctg1_3397		GCF_900105615.1/NZ_LT630003.1.region004_10 # 10001 # 10150 # 1 # ID=22031_10;partial=00;start_type=ATG;rbs_motif=AGGA;rbs_spacer=5-10bp;gc_cont=0.347	Y
[Clostridium]_spiroforme_An149_GCF_002160695.1	Firmicutes	Erysipelotrichia	Erysipelotrichales	Erysipelotrichaceae	Erysipelatoclostridium	r29c1	cyclic-lactone-autoinducer	NZ_NFLB01000005.region001.gbk	57917	79432	21516	21	57916	79432	[Clostridium]_spiroforme_An149_GCF_002160695.1__r29c1__ctg29_66	[Clostridium]_spiroforme_An149_GCF_002160695.1__r29c1__ctg29_64		GCF_002160695.1/NZ_NFLB01000005.region001_9 # 10001 # 10147 # -1 # ID=22523_9;partial=00;start_type=ATG;rbs_motif=GGAG/GAGG;rbs_spacer=5-10bp;gc_cont=0.286	Y
[Clostridium]_spiroforme_An149_GCF_002160695.1	Firmicutes	Erysipelotrichia	Erysipelotrichales	Erysipelotrichaceae	Erysipelatoclostridium	r7c1	cyclic-lactone-autoinducer	NZ_NFLB01000015.region001.gbk	24094	44769	20676	21	24093	44769	[Clostridium]_spiroforme_An149_GCF_002160695.1__r7c1__ctg7_32	[Clostridium]_spiroforme_An149_GCF_002160695.1__r7c1__ctg7_33		GCF_002160695.1/NZ_NFLB01000015.region001_11 # 10545 # 10676 # 1 # ID=22524_11;partial=00;start_type=ATG;rbs_motif=GGA/GAG/AGG;rbs_spacer=5-10bp;gc_cont=0.295	Y
[Clostridium]_spiroforme_An158_GCF_002160645.1	Firmicutes	Erysipelotrichia	Erysipelotrichales	Erysipelotrichaceae	Erysipelatoclostridium	r15c1	cyclic-lactone-autoinducer	NZ_NFKY01000015.region001.gbk	44508	59882	15375	15	44507	59882	[Clostridium]_spiroforme_An158_GCF_002160645.1__r15c1__ctg15_57	[Clostridium]_spiroforme_An158_GCF_002160645.1__r15c1__ctg15_55		GCF_002160645.1/NZ_NFKY01000015.region001_9 # 10001 # 10147 # -1 # ID=22939_9;partial=00;start_type=ATG;rbs_motif=GGAG/GAGG;rbs_spacer=5-10bp;gc_cont=0.286	Y
[Clostridium]_spiroforme_An158_GCF_002160645.1	Firmicutes	Erysipelotrichia	Erysipelotrichales	Erysipelotrichaceae	Erysipelatoclostridium	r1c1	cyclic-lactone-autoinducer	NZ_NFKY01000001.region001.gbk	32866	53541	20676	21	32865	53541	[Clostridium]_spiroforme_An158_GCF_002160645.1__r1c1__ctg1_47	[Clostridium]_spiroforme_An158_GCF_002160645.1__r1c1__ctg1_48		GCF_002160645.1/NZ_NFKY01000001.region001_11 # 10545 # 10676 # 1 # ID=22940_11;partial=00;start_type=ATG;rbs_motif=GGA/GAG/AGG;rbs_spacer=5-10bp;gc_cont=0.295	Y
[Clostridium]_spiroforme_An26_GCF_002159775.1	Firmicutes	Erysipelotrichia	Erysipelotrichales	Erysipelotrichaceae	Erysipelatoclostridium	r22c1	cyclic-lactone-autoinducer	NZ_NFJI01000020.region001.gbk	29233	47457	18225	20	29232	47457	[Clostridium]_spiroforme_An26_GCF_002159775.1__r22c1__ctg22_39	[Clostridium]_spiroforme_An26_GCF_002159775.1__r22c1__ctg22_40		GCF_002159775.1/NZ_NFJI01000020.region001_11 # 10554 # 10685 # 1 # ID=23402_11;partial=00;start_type=ATG;rbs_motif=GGA/GAG/AGG;rbs_spacer=5-10bp;gc_cont=0.311	Y
[Clostridium]_spiroforme_An26_GCF_002159775.1	Firmicutes	Erysipelotrichia	Erysipelotrichales	Erysipelotrichaceae	Erysipelatoclostridium	r43c1	cyclic-lactone-autoinducer	NZ_NFJI01000004.region001.gbk	1	15341	15341	13	0	15341	[Clostridium]_spiroforme_An26_GCF_002159775.1__r43c1__ctg43_4	[Clostridium]_spiroforme_An26_GCF_002159775.1__r43c1__ctg43_6		GCF_002159775.1/NZ_NFJI01000004.region001_6 # 5195 # 5341 # 1 # ID=23403_6;partial=00;start_type=ATG;rbs_motif=GGAG/GAGG;rbs_spacer=5-10bp;gc_cont=0.293	Y
[Clostridium]_spiroforme_An429_GCF_016902215.1	Firmicutes	Erysipelotrichia	Erysipelotrichales	Erysipelotrichaceae	Erysipelatoclostridium	r11c1	cyclic-lactone-autoinducer	c00011_NZ_JACJ...region001.gbk	35034	53145	18112	19	35033	53145	[Clostridium]_spiroforme_An429_GCF_016902215.1__r11c1__ctg11_59	[Clostridium]_spiroforme_An429_GCF_016902215.1__r11c1__ctg11_58		GCF_016902215.1/c00011_NZ_JACJ...region001_10 # 10001 # 10120 # -1 # ID=24207_10;partial=00;start_type=ATG;rbs_motif=GGAG/GAGG;rbs_spacer=5-10bp;gc_cont=0.342	Y
[Clostridium]_spiroforme_An433a_GCF_016900805.1	Firmicutes	Erysipelotrichia	Erysipelotrichales	Erysipelotrichaceae	Erysipelatoclostridium	r7c1	cyclic-lactone-autoinducer	c00007_NZ_JACJ...region001.gbk	35034	53145	18112	19	35033	53145	[Clostridium]_spiroforme_An433a_GCF_016900805.1__r7c1__ctg7_59	[Clostridium]_spiroforme_An433a_GCF_016900805.1__r7c1__ctg7_58		GCF_016900805.1/c00007_NZ_JACJ...region001_10 # 10001 # 10120 # -1 # ID=24208_10;partial=00;start_type=ATG;rbs_motif=GGAG/GAGG;rbs_spacer=5-10bp;gc_cont=0.342	Y
[Clostridium]_spiroforme_An567_GCF_016901755.1	Firmicutes	Erysipelotrichia	Erysipelotrichales	Erysipelotrichaceae	Erysipelatoclostridium	r67c1	cyclic-lactone-autoinducer	c00067_NZ_JACJ...region001.gbk	26922	47546	20625	22	26921	47546	[Clostridium]_spiroforme_An567_GCF_016901755.1__r67c1__ctg67_35	[Clostridium]_spiroforme_An567_GCF_016901755.1__r67c1__ctg67_36		GCF_016901755.1/c00067_NZ_JACJ...region001_14 # 10506 # 10625 # 1 # ID=24928_14;partial=00;start_type=ATG;rbs_motif=GGAG/GAGG;rbs_spacer=5-10bp;gc_cont=0.292	Y
[Clostridium]_spiroforme_Coassembly_mag_182_GCF_904395875.1	Firmicutes	Erysipelotrichia	Erysipelotrichales	Erysipelotrichaceae	Erysipelatoclostridium	r135c1	cyclic-lactone-autoinducer	c00135_NZ_CAJF...region001.gbk	30513	41500	10988	15	30512	41500	[Clostridium]_spiroforme_Coassembly_mag_182_GCF_904395875.1__r135c1__ctg135_42	[Clostridium]_spiroforme_Coassembly_mag_182_GCF_904395875.1__r135c1__ctg135_43		GCF_904395875.1/c00135_NZ_CAJF...region001_15 # 10554 # 10685 # 1 # ID=25465_15;partial=00;start_type=ATG;rbs_motif=GGA/GAG/AGG;rbs_spacer=5-10bp;gc_cont=0.303	Y
[Clostridium]_spiroforme_DSM_1552_GCF_000154805.1	Firmicutes	Erysipelotrichia	Erysipelotrichales	Erysipelotrichaceae	Erysipelatoclostridium	r1c1	cyclic-lactone-autoinducer	NZ_DS562854.1.region001.gbk	383751	404426	20676	24	383750	404426	[Clostridium]_spiroforme_DSM_1552_GCF_000154805.1__r1c1__ctg1_331	[Clostridium]_spiroforme_DSM_1552_GCF_000154805.1__r1c1__ctg1_332		GCF_000154805.1/NZ_DS562854.1.region001_12 # 10545 # 10676 # 1 # ID=25964_12;partial=00;start_type=ATG;rbs_motif=None;rbs_spacer=None;gc_cont=0.295	Y
[Clostridium]_spiroforme_MGYG-HGUT-01304_GCF_902373765.1	Firmicutes	Erysipelotrichia	Erysipelotrichales	Erysipelotrichaceae	Erysipelatoclostridium	r1c1	cyclic-lactone-autoinducer	c00001_NZ_CABK...region001.gbk	383751	404426	20676	24	383750	404426	[Clostridium]_spiroforme_MGYG-HGUT-01304_GCF_902373765.1__r1c1__ctg1_331	[Clostridium]_spiroforme_MGYG-HGUT-01304_GCF_902373765.1__r1c1__ctg1_332		GCF_902373765.1/c00001_NZ_CABK...region001_12 # 10545 # 10676 # 1 # ID=27090_12;partial=00;start_type=ATG;rbs_motif=None;rbs_spacer=None;gc_cont=0.295	Y
[Clostridium]_spiroforme_OM02-6_GCF_003439345.1	Firmicutes	Erysipelotrichia	Erysipelotrichales	Erysipelotrichaceae	Erysipelatoclostridium	r19c1	cyclic-lactone-autoinducer	NZ_QSVF01000026.region001.gbk	7841	28525	20685	23	7840	28525	[Clostridium]_spiroforme_OM02-6_GCF_003439345.1__r19c1__ctg19_17	[Clostridium]_spiroforme_OM02-6_GCF_003439345.1__r19c1__ctg19_16		GCF_003439345.1/NZ_QSVF01000026.region001_13 # 10001 # 10132 # -1 # ID=27091_13;partial=00;start_type=ATG;rbs_motif=None;rbs_spacer=None;gc_cont=0.288	Y
[Clostridium]_symbiosum_1001285H_161024_D9_GCF_015560355.1	Firmicutes	Clostridia	Eubacteriales	Lachnospiraceae	Lachnoclostridium	r163c1	cyclic-lactone-autoinducer	c00163_NZ_JADM...region001.gbk	4302	24877	20576	23	4301	24877	[Clostridium]_symbiosum_1001285H_161024_D9_GCF_015560355.1__r163c1__ctg163_16			GCF_015560355.1/c00163_NZ_JADM...region001_12 # 9849 # 10004 # 1 # ID=27556_12;partial=00;start_type=ATG;rbs_motif=AGGAGG;rbs_spacer=5-10bp;gc_cont=0.346	Y
[Clostridium]_ultunense_DSM_10521_GCF_000511955.1	Firmicutes	Tissierellia	Tissierellales	Tissierellaceae	Schnuerera	r6c1	cyclic-lactone-autoinducer	NZ_AZSU01000006.region001.gbk	144276	164902	20627	20	144275	164902	[Clostridium]_ultunense_DSM_10521_GCF_000511955.1__r6c1__ctg6_163				N
[Clostridium]_ultunense_Esp_Clostridium_ultunense_strain_Esp_GCF_900120235.1	Firmicutes	Tissierellia	Tissierellales	Tissierellaceae	Schnuerera	r1c4	cyclic-lactone-autoinducer	NZ_LT669839.1.region004.gbk	2604768	2625367	20600	20	2604767	2625367	[Clostridium]_ultunense_Esp_Clostridium_ultunense_strain_Esp_GCF_900120235.1__r1c4__ctg1_2684				N
[Eubacterium]_eligens_ATCC_27750_GCF_000146185.1	Firmicutes	Clostridia	Eubacteriales	Lachnospiraceae	Lachnospira	r1c1	cyclic-lactone-autoinducer	NC_012778.1.region001.gbk	641336	667089	25754	30	641335	667089	[Eubacterium]_eligens_ATCC_27750_GCF_000146185.1__r1c1__ctg1_604	[Eubacterium]_eligens_ATCC_27750_GCF_000146185.1__r1c1__ctg1_596		GCF_000146185.1/NC_012778.1.region001_15 # 10001 # 10150 # 1 # ID=27833_15;partial=00;start_type=ATG;rbs_motif=AGGAGG;rbs_spacer=5-10bp;gc_cont=0.333	Y
[Eubacterium]_eligens_ATCC_27750_GCF_000146185.1	Firmicutes	Clostridia	Eubacteriales	Lachnospiraceae	Lachnospira	r3c1	cyclic-lactone-autoinducer	NC_012780.1.region001.gbk	36948	55354	18407	19	36947	55354	[Eubacterium]_eligens_ATCC_27750_GCF_000146185.1__r3c1__ctg3_59	[Eubacterium]_eligens_ATCC_27750_GCF_000146185.1__r3c1__ctg3_58			Y
[Eubacterium]_eligens_ATCC_27750_GCF_000146185.1	Firmicutes	Clostridia	Eubacteriales	Lachnospiraceae	Lachnospira	r3c2	cyclic-lactone-autoinducer	NC_012780.1.region002.gbk	58689	84141	25453	30	58688	84141	[Eubacterium]_eligens_ATCC_27750_GCF_000146185.1__r3c2__ctg3_79	[Eubacterium]_eligens_ATCC_27750_GCF_000146185.1__r3c2__ctg3_86			Y
[Eubacterium]_tenue_1001254J_160919_B3_GCF_015668515.1	Firmicutes	Clostridia	Eubacteriales	Peptostreptococcaceae	Paeniclostridium	r11c1	cyclic-lactone-autoinducer	c00011_NZ_JADP...region001.gbk	1249624	1270208	20585	17	1249623	1270208	[Eubacterium]_tenue_1001254J_160919_B3_GCF_015668515.1__r11c1__ctg11_1253				N
[Eubacterium]_tenue_1001254J_160919_B3_GCF_015668515.1	Firmicutes	Clostridia	Eubacteriales	Peptostreptococcaceae	Paeniclostridium	r22c1	cyclic-lactone-autoinducer	c00022_NZ_JADP...region001.gbk	73516	94300	20785	21	73515	94300	[Eubacterium]_tenue_1001254J_160919_B3_GCF_015668515.1__r22c1__ctg22_75	[Eubacterium]_tenue_1001254J_160919_B3_GCF_015668515.1__r22c1__ctg22_76			Y
[Eubacterium]_tenue_GNFAT-D2-96_GCF_014385355.1	Firmicutes	Clostridia	Eubacteriales	Peptostreptococcaceae	Paeniclostridium	r17c1	cyclic-lactone-autoinducer	c00017_NZ_JACR...region001.gbk	40163	56085	15923	13	40162	56085	[Eubacterium]_tenue_GNFAT-D2-96_GCF_014385355.1__r17c1__ctg17_48	[Eubacterium]_tenue_GNFAT-D2-96_GCF_014385355.1__r17c1__ctg17_47		GCF_014385355.1/c00017_NZ_JACR...region001_10 # 10001 # 10147 # -1 # ID=28765_10;partial=00;start_type=ATG;rbs_motif=GGA/GAG/AGG;rbs_spacer=5-10bp;gc_cont=0.265	Y
[Eubacterium]_tenue_GNFAT-D2-96_GCF_014385355.1	Firmicutes	Clostridia	Eubacteriales	Peptostreptococcaceae	Paeniclostridium	r3c1	cyclic-lactone-autoinducer	c00003_NZ_JACR...region001.gbk	75096	95879	20784	21	75095	95879	[Eubacterium]_tenue_GNFAT-D2-96_GCF_014385355.1__r3c1__ctg3_79	[Eubacterium]_tenue_GNFAT-D2-96_GCF_014385355.1__r3c1__ctg3_80			Y
[Eubacterium]_tenue_GNFAT-D2-96_GCF_014385355.1	Firmicutes	Clostridia	Eubacteriales	Peptostreptococcaceae	Paeniclostridium	r7c1	cyclic-lactone-autoinducer	c00007_NZ_JACR...region001.gbk	89605	110189	20585	18	89604	110189	[Eubacterium]_tenue_GNFAT-D2-96_GCF_014385355.1__r7c1__ctg7_104				N
[Ruminococcus]_gnavus_1001285H_161024_A10_GCF_015554725.1	Firmicutes	Clostridia	Eubacteriales	Lachnospiraceae	Mediterraneibacter	r1c1	cyclic-lactone-autoinducer	c00001_NZ_JADN...region001.gbk	1	18583	18583	17	0	18583	[Ruminococcus]_gnavus_1001285H_161024_A10_GCF_015554725.1__r1c1__ctg1_9				N
[Ruminococcus]_gnavus_1001285H_161024_A10_GCF_015554725.1	Firmicutes	Clostridia	Eubacteriales	Lachnospiraceae	Mediterraneibacter	r7c1	NRPS,cyclic-lactone-autoinducer	c00007_NZ_JADN...region001.gbk	15458	68638	53181	33	42502	63254	[Ruminococcus]_gnavus_1001285H_161024_A10_GCF_015554725.1__r7c1__ctg7_47	[Ruminococcus]_gnavus_1001285H_161024_A10_GCF_015554725.1__r7c1__ctg7_48		GCF_015554725.1/c00007_NZ_JADN...region001_27 # 37642 # 37797 # -1 # ID=29070_27;partial=00;start_type=ATG;rbs_motif=AGGAGG;rbs_spacer=5-10bp;gc_cont=0.353	Y
[Ruminococcus]_gnavus_1001302B_160321_G6_GCF_015557345.1	Firmicutes	Clostridia	Eubacteriales	Lachnospiraceae	Mediterraneibacter	r23c1	cyclic-lactone-autoinducer	c00023_NZ_JADN...region001.gbk	19466	39081	19616	18	19465	39081	[Ruminococcus]_gnavus_1001302B_160321_G6_GCF_015557345.1__r23c1__ctg23_29	[Ruminococcus]_gnavus_1001302B_160321_G6_GCF_015557345.1__r23c1__ctg23_28		GCF_015557345.1/c00023_NZ_JADN...region001_10 # 10001 # 10150 # 1 # ID=29529_10;partial=00;start_type=ATG;rbs_motif=TAA;rbs_spacer=4bp;gc_cont=0.307	Y
[Ruminococcus]_gnavus_1001302B_160321_G6_GCF_015557345.1	Firmicutes	Clostridia	Eubacteriales	Lachnospiraceae	Mediterraneibacter	r33c1	NRPS,NRPS-like,cyclic-lactone-autoinducer,transAT-PKS	c00033_NZ_JADN...region001.gbk	113557	189016	75460	43	113556	134126	[Ruminococcus]_gnavus_1001302B_160321_G6_GCF_015557345.1__r33c1__ctg33_117			GCF_015557345.1/c00033_NZ_JADN...region001_5 # 6360 # 6506 # -1 # ID=29530_5;partial=00;start_type=ATG;rbs_motif=AGGA;rbs_spacer=5-10bp;gc_cont=0.293	Y
[Ruminococcus]_gnavus_AF13-14A_GCF_003464875.1	Firmicutes	Clostridia	Eubacteriales	Lachnospiraceae	Mediterraneibacter	r47c1	cyclic-lactone-autoinducer	NZ_QSAA01000032.region001.gbk	9747	30292	20546	22	9746	30292	[Ruminococcus]_gnavus_AF13-14A_GCF_003464875.1__r47c1__ctg47_25				N
[Ruminococcus]_gnavus_AF19-16AC_GCF_003459705.1	Firmicutes	Clostridia	Eubacteriales	Lachnospiraceae	Mediterraneibacter	r1c1	NRPS,cyclic-lactone-autoinducer	NZ_QRWQ01000001.region001.gbk	205160	258336	53177	39	231447	252205	[Ruminococcus]_gnavus_AF19-16AC_GCF_003459705.1__r1c1__ctg1_218	[Ruminococcus]_gnavus_AF19-16AC_GCF_003459705.1__r1c1__ctg1_219		GCF_003459705.1/NZ_QRWQ01000001.region001_33 # 36888 # 37046 # -1 # ID=30093_33;partial=00;start_type=ATG;rbs_motif=AGGAGG;rbs_spacer=5-10bp;gc_cont=0.421	Y
[Ruminococcus]_gnavus_AF19-16AC_GCF_003459705.1	Firmicutes	Clostridia	Eubacteriales	Lachnospiraceae	Mediterraneibacter	r33c1	cyclic-lactone-autoinducer	NZ_QRWQ01000039.region001.gbk	1	7200	7200	10	0	7200	[Ruminococcus]_gnavus_AF19-16AC_GCF_003459705.1__r33c1__ctg33_5				N
[Ruminococcus]_gnavus_AF24-23LB_GCF_003459125.1	Firmicutes	Clostridia	Eubacteriales	Lachnospiraceae	Mediterraneibacter	r39c1	cyclic-lactone-autoinducer	NZ_QRUR01000006.region001.gbk	109979	130524	20546	19	109978	130524	[Ruminococcus]_gnavus_AF24-23LB_GCF_003459125.1__r39c1__ctg39_121				N
[Ruminococcus]_gnavus_AF27-4BH_GCF_003457855.1	Firmicutes	Clostridia	Eubacteriales	Lachnospiraceae	Mediterraneibacter	r118c1	cyclic-lactone-autoinducer	NZ_QRTJ01000087.region001.gbk	1	4570	4570	6	0	4570	[Ruminococcus]_gnavus_AF27-4BH_GCF_003457855.1__r118c1__ctg118_5	[Ruminococcus]_gnavus_AF27-4BH_GCF_003457855.1__r118c1__ctg118_4		GCF_003457855.1/NZ_QRTJ01000087.region001_4 # 3226 # 3375 # 1 # ID=30628_4;partial=00;start_type=ATG;rbs_motif=AGGAG;rbs_spacer=5-10bp;gc_cont=0.307	Y
[Ruminococcus]_gnavus_AF33-12_GCF_003475365.1	Firmicutes	Clostridia	Eubacteriales	Lachnospiraceae	Mediterraneibacter	r109c1	cyclic-lactone-autoinducer	NZ_QRQE01000035.region001.gbk	1	11724	11724	16	0	11724	[Ruminococcus]_gnavus_AF33-12_GCF_003475365.1__r109c1__ctg109_3	[Ruminococcus]_gnavus_AF33-12_GCF_003475365.1__r109c1__ctg109_2			Y
[Ruminococcus]_gnavus_AF33-12_GCF_003475365.1	Firmicutes	Clostridia	Eubacteriales	Lachnospiraceae	Mediterraneibacter	r122c1	NRPS,cyclic-lactone-autoinducer	NZ_QRQE01000047.region001.gbk	1	29412	29412	29	13679	29412	[Ruminococcus]_gnavus_AF33-12_GCF_003475365.1__r122c1__ctg122_24	[Ruminococcus]_gnavus_AF33-12_GCF_003475365.1__r122c1__ctg122_25		GCF_003475365.1/NZ_QRQE01000047.region001_23 # 24233 # 24373 # -1 # ID=31095_23;partial=00;start_type=ATG;rbs_motif=AGGAG;rbs_spacer=5-10bp;gc_cont=0.255	Y
[Ruminococcus]_gnavus_AF33-12_GCF_003475365.1	Firmicutes	Clostridia	Eubacteriales	Lachnospiraceae	Mediterraneibacter	r137c1	cyclic-lactone-autoinducer	NZ_QRQE01000060.region001.gbk	1	10385	10385	16	0	10385	[Ruminococcus]_gnavus_AF33-12_GCF_003475365.1__r137c1__ctg137_1	[Ruminococcus]_gnavus_AF33-12_GCF_003475365.1__r137c1__ctg137_2			Y
[Ruminococcus]_gnavus_AF33-12_GCF_003475365.1	Firmicutes	Clostridia	Eubacteriales	Lachnospiraceae	Mediterraneibacter	r153c1	cyclic-lactone-autoinducer	NZ_QRQE01000075.region001.gbk	3379	13824	10446	7	3378	13824	[Ruminococcus]_gnavus_AF33-12_GCF_003475365.1__r153c1__ctg153_13				N
[Ruminococcus]_gnavus_AF33-12_GCF_003475365.1	Firmicutes	Clostridia	Eubacteriales	Lachnospiraceae	Mediterraneibacter	r35c1	cyclic-lactone-autoinducer	NZ_QRQE01000013.region001.gbk	1	11383	11383	18	0	11383	[Ruminococcus]_gnavus_AF33-12_GCF_003475365.1__r35c1__ctg35_3	[Ruminococcus]_gnavus_AF33-12_GCF_003475365.1__r35c1__ctg35_2		GCF_003475365.1/NZ_QRQE01000013.region001_2 # 624 # 776 # 1 # ID=31096_2;partial=00;start_type=ATG;rbs_motif=GGAG/GAGG;rbs_spacer=5-10bp;gc_cont=0.301	Y
[Ruminococcus]_gnavus_AF33-12_GCF_003475365.1	Firmicutes	Clostridia	Eubacteriales	Lachnospiraceae	Mediterraneibacter	r91c1	cyclic-lactone-autoinducer	NZ_QRQE01000019.region001.gbk	6045	26778	20734	18	6044	26778	[Ruminococcus]_gnavus_AF33-12_GCF_003475365.1__r91c1__ctg91_17	[Ruminococcus]_gnavus_AF33-12_GCF_003475365.1__r91c1__ctg91_16			Y
[Ruminococcus]_gnavus_AF34-4BH_GCF_003475065.1	Firmicutes	Clostridia	Eubacteriales	Lachnospiraceae	Mediterraneibacter	r21c1	cyclic-lactone-autoinducer	NZ_QRPU01000028.region001.gbk	1	15507	15507	18	0	15507	[Ruminococcus]_gnavus_AF34-4BH_GCF_003475065.1__r21c1__ctg21_5				N
[Ruminococcus]_gnavus_AF34-4BH_GCF_003475065.1	Firmicutes	Clostridia	Eubacteriales	Lachnospiraceae	Mediterraneibacter	r45c1	RRE-containing,cyclic-lactone-autoinducer	NZ_QRPU01000005.region001.gbk	1	25841	25841	30	0	14833	[Ruminococcus]_gnavus_AF34-4BH_GCF_003475065.1__r45c1__ctg45_7	[Ruminococcus]_gnavus_AF34-4BH_GCF_003475065.1__r45c1__ctg45_8		GCF_003475065.1/NZ_QRPU01000005.region001_8 # 4531 # 4833 # -1 # ID=31541_8;partial=00;start_type=ATG;rbs_motif=None;rbs_spacer=None;gc_cont=0.320	Y
[Ruminococcus]_gnavus_AM12-54_GCF_003473185.1	Firmicutes	Clostridia	Eubacteriales	Lachnospiraceae	Mediterraneibacter	r47c1	cyclic-lactone-autoinducer	NZ_QRLN01000008.region001.gbk	35642	56187	20546	19	35641	56187	[Ruminococcus]_gnavus_AM12-54_GCF_003473185.1__r47c1__ctg47_58				N
[Ruminococcus]_gnavus_AM13-39_GCF_003473045.1	Firmicutes	Clostridia	Eubacteriales	Lachnospiraceae	Mediterraneibacter	r33c1	cyclic-lactone-autoinducer	NZ_QRLD01000039.region001.gbk	1	10549	10549	12	0	10549	[Ruminococcus]_gnavus_AM13-39_GCF_003473045.1__r33c1__ctg33_10				N
[Ruminococcus]_gnavus_AM17-51_GCF_003471625.1	Firmicutes	Clostridia	Eubacteriales	Lachnospiraceae	Mediterraneibacter	r56c1	cyclic-lactone-autoinducer	NZ_QRJQ01000006.region001.gbk	68683	89228	20546	19	68682	89228	[Ruminococcus]_gnavus_AM17-51_GCF_003471625.1__r56c1__ctg56_70				N
[Ruminococcus]_gnavus_AM21-18_GCF_003471265.1	Firmicutes	Clostridia	Eubacteriales	Lachnospiraceae	Mediterraneibacter	r54c1	cyclic-lactone-autoinducer	NZ_QRIS01000035.region001.gbk	19906	34624	14719	17	19905	34624	[Ruminococcus]_gnavus_AM21-18_GCF_003471265.1__r54c1__ctg54_31	[Ruminococcus]_gnavus_AM21-18_GCF_003471265.1__r54c1__ctg54_30		GCF_003471265.1/NZ_QRIS01000035.region001_10 # 10001 # 10153 # 1 # ID=32064_10;partial=00;start_type=ATG;rbs_motif=AGGAG;rbs_spacer=5-10bp;gc_cont=0.340	Y
[Ruminococcus]_gnavus_AM21-41_GCF_003470485.1	Firmicutes	Clostridia	Eubacteriales	Lachnospiraceae	Mediterraneibacter	r62c1	cyclic-lactone-autoinducer	NZ_QRIP01000036.region001.gbk	1	14572	14572	17	0	14572	[Ruminococcus]_gnavus_AM21-41_GCF_003470485.1__r62c1__ctg62_7	[Ruminococcus]_gnavus_AM21-41_GCF_003470485.1__r62c1__ctg62_8		GCF_003470485.1/NZ_QRIP01000036.region001_9 # 4420 # 4572 # -1 # ID=32464_9;partial=00;start_type=ATG;rbs_motif=AGGAG;rbs_spacer=5-10bp;gc_cont=0.340	Y
[Ruminococcus]_gnavus_AM22-7AC_GCF_003471005.1	Firmicutes	Clostridia	Eubacteriales	Lachnospiraceae	Mediterraneibacter	r57c1	cyclic-lactone-autoinducer	NZ_QRIA01000008.region001.gbk	146123	165308	19186	19	146122	165308	[Ruminococcus]_gnavus_AM22-7AC_GCF_003471005.1__r57c1__ctg57_146				N
[Ruminococcus]_gnavus_AM22-7AC_GCF_003471005.1	Firmicutes	Clostridia	Eubacteriales	Lachnospiraceae	Mediterraneibacter	r7c1	cyclic-lactone-autoinducer	NZ_QRIA01000015.region001.gbk	52217	75476	23260	32	52216	75476	[Ruminococcus]_gnavus_AM22-7AC_GCF_003471005.1__r7c1__ctg7_68	[Ruminococcus]_gnavus_AM22-7AC_GCF_003471005.1__r7c1__ctg7_72		GCF_003471005.1/NZ_QRIA01000015.region001_20 # 13111 # 13260 # -1 # ID=32850_20;partial=00;start_type=ATG;rbs_motif=None;rbs_spacer=None;gc_cont=0.267	Y
[Ruminococcus]_gnavus_AM27-32_GCF_003469585.1	Firmicutes	Clostridia	Eubacteriales	Lachnospiraceae	Mediterraneibacter	r10c1	cyclic-lactone-autoinducer	NZ_QSKP01000018.region001.gbk	29761	49851	20091	22	29760	49851	[Ruminococcus]_gnavus_AM27-32_GCF_003469585.1__r10c1__ctg10_48				N
[Ruminococcus]_gnavus_AM27-32_GCF_003469585.1	Firmicutes	Clostridia	Eubacteriales	Lachnospiraceae	Mediterraneibacter	r25c1	RRE-containing,cyclic-lactone-autoinducer	NZ_QSKP01000031.region001.gbk	1	24272	24272	31	12306	24272	[Ruminococcus]_gnavus_AM27-32_GCF_003469585.1__r25c1__ctg25_29	[Ruminococcus]_gnavus_AM27-32_GCF_003469585.1__r25c1__ctg25_30			Y
[Ruminococcus]_gnavus_AM32-6_GCF_003468635.1	Firmicutes	Clostridia	Eubacteriales	Lachnospiraceae	Mediterraneibacter	r61c1	cyclic-lactone-autoinducer	NZ_QSIR01000064.region001.gbk	1	8424	8424	11	0	8424	[Ruminococcus]_gnavus_AM32-6_GCF_003468635.1__r61c1__ctg61_7	[Ruminococcus]_gnavus_AM32-6_GCF_003468635.1__r61c1__ctg61_8		GCF_003468635.1/NZ_QSIR01000064.region001_8 # 5499 # 5648 # -1 # ID=33859_8;partial=00;start_type=ATG;rbs_motif=AGGAG;rbs_spacer=5-10bp;gc_cont=0.313	Y
[Ruminococcus]_gnavus_AM38-12_GCF_003467625.1	Firmicutes	Clostridia	Eubacteriales	Lachnospiraceae	Mediterraneibacter	r1c1	cyclic-lactone-autoinducer	NZ_QSHH01000001.region001.gbk	251046	271591	20546	16	251045	271591	[Ruminococcus]_gnavus_AM38-12_GCF_003467625.1__r1c1__ctg1_224				N
[Ruminococcus]_gnavus_BSD2780061687_150420_H1_GCF_015666995.1	Firmicutes	Clostridia	Eubacteriales	Lachnospiraceae	Mediterraneibacter	r9c1	NRPS,cyclic-lactone-autoinducer	c00009_NZ_JADP...region001.gbk	1	46520	46520	36	20660	41412	[Ruminococcus]_gnavus_BSD2780061687_150420_H1_GCF_015666995.1__r9c1__ctg9_29	[Ruminococcus]_gnavus_BSD2780061687_150420_H1_GCF_015666995.1__r9c1__ctg9_30		GCF_015666995.1/c00009_NZ_JADP...region001_27 # 31257 # 31412 # -1 # ID=12_27;partial=00;start_type=ATG;rbs_motif=AGGAGG;rbs_spacer=5-10bp;gc_cont=0.365	Y
[Ruminococcus]_gnavus_D31t1_170403_H6_GCF_015561245.1	Firmicutes	Clostridia	Eubacteriales	Lachnospiraceae	Mediterraneibacter	r30c1	RRE-containing,cyclic-lactone-autoinducer,lanthipeptide-class-ii	c00030_NZ_JADM...region001.gbk	305	41551	41247	42	11994	32757	[Ruminococcus]_gnavus_D31t1_170403_H6_GCF_015561245.1__r30c1__ctg30_23	[Ruminococcus]_gnavus_D31t1_170403_H6_GCF_015561245.1__r30c1__ctg30_24		GCF_015561245.1/c00030_NZ_JADM...region001_24 # 22298 # 22453 # -1 # ID=13_24;partial=00;start_type=ATG;rbs_motif=GGAG/GAGG;rbs_spacer=5-10bp;gc_cont=0.308	Y
[Ruminococcus]_gnavus_D31t1_170403_H6_GCF_015561245.1	Firmicutes	Clostridia	Eubacteriales	Lachnospiraceae	Mediterraneibacter	r44c1	NRPS,cyclic-lactone-autoinducer	c00044_NZ_JADM...region001.gbk	1	54641	54641	35	4034	24798	[Ruminococcus]_gnavus_D31t1_170403_H6_GCF_015561245.1__r44c1__ctg44_7	[Ruminococcus]_gnavus_D31t1_170403_H6_GCF_015561245.1__r44c1__ctg44_6		GCF_015561245.1/c00044_NZ_JADM...region001_6 # 14035 # 14193 # 1 # ID=14_6;partial=00;start_type=ATG;rbs_motif=AGGAGG;rbs_spacer=5-10bp;gc_cont=0.421	Y
[Ruminococcus]_gnavus_D31t1_170403_H6_GCF_015561245.1	Firmicutes	Clostridia	Eubacteriales	Lachnospiraceae	Mediterraneibacter	r48c1	NRPS,cyclic-lactone-autoinducer	c00048_NZ_JADM...region001.gbk	1	43844	43844	27	3047	23769	[Ruminococcus]_gnavus_D31t1_170403_H6_GCF_015561245.1__r48c1__ctg48_7	[Ruminococcus]_gnavus_D31t1_170403_H6_GCF_015561245.1__r48c1__ctg48_6		GCF_015561245.1/c00048_NZ_JADM...region001_6 # 13048 # 13203 # 1 # ID=15_6;partial=00;start_type=ATG;rbs_motif=AAAA;rbs_spacer=3bp;gc_cont=0.359	Y
[Ruminococcus]_gnavus_D31t1_170403_H6_GCF_015561245.1	Firmicutes	Clostridia	Eubacteriales	Lachnospiraceae	Mediterraneibacter	r73c1	cyclic-lactone-autoinducer	c00073_NZ_JADM...region001.gbk	1	10880	10880	12	0	10880	[Ruminococcus]_gnavus_D31t1_170403_H6_GCF_015561245.1__r73c1__ctg73_2				N
[Ruminococcus]_gnavus_D33t1_170424_E3_GCF_015561395.1	Firmicutes	Clostridia	Eubacteriales	Lachnospiraceae	Mediterraneibacter	r187c1	cyclic-lactone-autoinducer	c00187_NZ_JADM...region001.gbk	1	1092	1092	3	0	1092	[Ruminococcus]_gnavus_D33t1_170424_E3_GCF_015561395.1__r187c1__ctg187_2				N
[Ruminococcus]_gnavus_D33t1_170424_E3_GCF_015561395.1	Firmicutes	Clostridia	Eubacteriales	Lachnospiraceae	Mediterraneibacter	r261c1	NRPS,cyclic-lactone-autoinducer	c00261_NZ_JADM...region001.gbk	1	14672	14672	9	0	14230	[Ruminococcus]_gnavus_D33t1_170424_E3_GCF_015561395.1__r261c1__ctg261_5	[Ruminococcus]_gnavus_D33t1_170424_E3_GCF_015561395.1__r261c1__ctg261_4		GCF_015561395.1/c00261_NZ_JADM...region001_4 # 3488 # 3646 # 1 # ID=34_4;partial=00;start_type=ATG;rbs_motif=AGGAGG;rbs_spacer=5-10bp;gc_cont=0.415	Y
[Ruminococcus]_gnavus_D52t1_170925_A9_GCF_015559285.1	Firmicutes	Clostridia	Eubacteriales	Lachnospiraceae	Mediterraneibacter	r8c1	NRPS,cyclic-lactone-autoinducer	c00008_NZ_JADM...region001.gbk	1	30585	30585	17	4725	25477	[Ruminococcus]_gnavus_D52t1_170925_A9_GCF_015559285.1__r8c1__ctg8_10	[Ruminococcus]_gnavus_D52t1_170925_A9_GCF_015559285.1__r8c1__ctg8_11			Y
[Ruminococcus]_gnavus_MSK.15.10_GCF_013303765.1	Firmicutes	Clostridia	Eubacteriales	Lachnospiraceae	Mediterraneibacter	r28c1	cyclic-lactone-autoinducer	c00028_NZ_JAAI...region001.gbk	2873	25357	22485	22	2872	25357	[Ruminococcus]_gnavus_MSK.15.10_GCF_013303765.1__r28c1__ctg28_20	[Ruminococcus]_gnavus_MSK.15.10_GCF_013303765.1__r28c1__ctg28_22			Y
[Ruminococcus]_gnavus_MSK.15.18_GCF_013303705.1	Firmicutes	Clostridia	Eubacteriales	Lachnospiraceae	Mediterraneibacter	r27c1	cyclic-lactone-autoinducer	c00027_NZ_JAAI...region001.gbk	2873	25357	22485	22	2872	25357	[Ruminococcus]_gnavus_MSK.15.18_GCF_013303705.1__r27c1__ctg27_20	[Ruminococcus]_gnavus_MSK.15.18_GCF_013303705.1__r27c1__ctg27_22			Y
[Ruminococcus]_gnavus_MSK.15.32_GCF_013303695.1	Firmicutes	Clostridia	Eubacteriales	Lachnospiraceae	Mediterraneibacter	r61c1	cyclic-lactone-autoinducer	c00061_NZ_JAAI...region001.gbk	2873	25357	22485	22	2872	25357	[Ruminococcus]_gnavus_MSK.15.32_GCF_013303695.1__r61c1__ctg61_20	[Ruminococcus]_gnavus_MSK.15.32_GCF_013303695.1__r61c1__ctg61_22			Y
[Ruminococcus]_gnavus_MSK.15.54_GCF_013303665.1	Firmicutes	Clostridia	Eubacteriales	Lachnospiraceae	Mediterraneibacter	r28c1	cyclic-lactone-autoinducer	c00028_NZ_JAAI...region001.gbk	2873	25357	22485	22	2872	25357	[Ruminococcus]_gnavus_MSK.15.54_GCF_013303665.1__r28c1__ctg28_20	[Ruminococcus]_gnavus_MSK.15.54_GCF_013303665.1__r28c1__ctg28_22			Y
[Ruminococcus]_gnavus_MSK.15.56_GCF_013303675.1	Firmicutes	Clostridia	Eubacteriales	Lachnospiraceae	Mediterraneibacter	r28c1	cyclic-lactone-autoinducer	c00028_NZ_JAAI...region001.gbk	2873	25357	22485	22	2872	25357	[Ruminococcus]_gnavus_MSK.15.56_GCF_013303675.1__r28c1__ctg28_20	[Ruminococcus]_gnavus_MSK.15.56_GCF_013303675.1__r28c1__ctg28_22			Y
[Ruminococcus]_gnavus_MSK.15.58_GCF_013299785.1	Firmicutes	Clostridia	Eubacteriales	Lachnospiraceae	Mediterraneibacter	r29c1	cyclic-lactone-autoinducer	c00029_NZ_JAAI...region001.gbk	2873	25357	22485	22	2872	25357	[Ruminococcus]_gnavus_MSK.15.58_GCF_013299785.1__r29c1__ctg29_20	[Ruminococcus]_gnavus_MSK.15.58_GCF_013299785.1__r29c1__ctg29_22			Y
[Ruminococcus]_gnavus_MSK.15.59_GCF_013303685.1	Firmicutes	Clostridia	Eubacteriales	Lachnospiraceae	Mediterraneibacter	r31c1	cyclic-lactone-autoinducer	c00031_NZ_JAAI...region001.gbk	2871	25355	22485	23	2870	25355	[Ruminococcus]_gnavus_MSK.15.59_GCF_013303685.1__r31c1__ctg31_20	[Ruminococcus]_gnavus_MSK.15.59_GCF_013303685.1__r31c1__ctg31_22			Y
[Ruminococcus]_gnavus_MSK.15.9_GCF_013303605.1	Firmicutes	Clostridia	Eubacteriales	Lachnospiraceae	Mediterraneibacter	r28c1	cyclic-lactone-autoinducer	c00028_NZ_JAAI...region001.gbk	2873	25357	22485	22	2872	25357	[Ruminococcus]_gnavus_MSK.15.9_GCF_013303605.1__r28c1__ctg28_20	[Ruminococcus]_gnavus_MSK.15.9_GCF_013303605.1__r28c1__ctg28_22			Y
[Ruminococcus]_gnavus_MSK.22.24_GCF_013303585.1	Firmicutes	Clostridia	Eubacteriales	Lachnospiraceae	Mediterraneibacter	r35c1	cyclic-lactone-autoinducer,lanthipeptide-class-ii	c00035_NZ_JAAI...region001.gbk	2538	32892	30355	36	2537	23290	[Ruminococcus]_gnavus_MSK.22.24_GCF_013303585.1__r35c1__ctg35_16	[Ruminococcus]_gnavus_MSK.22.24_GCF_013303585.1__r35c1__ctg35_17		GCF_013303585.1/c00035_NZ_JAAI...region001_14 # 10595 # 10753 # -1 # ID=4728_14;partial=00;start_type=ATG;rbs_motif=AGGAG;rbs_spacer=5-10bp;gc_cont=0.321	Y
[Ruminococcus]_gnavus_MSK.22.24_GCF_013303585.1	Firmicutes	Clostridia	Eubacteriales	Lachnospiraceae	Mediterraneibacter	r45c1	cyclic-lactone-autoinducer	c00045_NZ_JAAI...region001.gbk	1	13151	13151	13	0	13151	[Ruminococcus]_gnavus_MSK.22.24_GCF_013303585.1__r45c1__ctg45_4				N
[Ruminococcus]_gnavus_MSK.22.24_GCF_013303585.1	Firmicutes	Clostridia	Eubacteriales	Lachnospiraceae	Mediterraneibacter	r65c1	cyclic-lactone-autoinducer	c00065_NZ_JAAI...region001.gbk	1	11286	11286	10	0	11286		[Ruminococcus]_gnavus_MSK.22.24_GCF_013303585.1__r65c1__ctg65_2			Y
[Ruminococcus]_gnavus_MSK.22.24_GCF_013303585.1	Firmicutes	Clostridia	Eubacteriales	Lachnospiraceae	Mediterraneibacter	r83c1	cyclic-lactone-autoinducer	c00083_NZ_JAAI...region001.gbk	1	7039	7039	8	0	7039	[Ruminococcus]_gnavus_MSK.22.24_GCF_013303585.1__r83c1__ctg83_3				N
[Ruminococcus]_gnavus_MSK.22.53_GCF_013303515.1	Firmicutes	Clostridia	Eubacteriales	Lachnospiraceae	Mediterraneibacter	r25c1	cyclic-lactone-autoinducer	c00025_NZ_JAAI...region001.gbk	16318	32345	16028	18	16317	32345	[Ruminococcus]_gnavus_MSK.22.53_GCF_013303515.1__r25c1__ctg25_36				N
[Ruminococcus]_gnavus_MSK.23.41_GCF_013303535.1	Firmicutes	Clostridia	Eubacteriales	Lachnospiraceae	Mediterraneibacter	r33c1	cyclic-lactone-autoinducer,lanthipeptide-class-ii	c00033_NZ_JAAI...region001.gbk	2538	32892	30355	36	2537	23290	[Ruminococcus]_gnavus_MSK.23.41_GCF_013303535.1__r33c1__ctg33_16	[Ruminococcus]_gnavus_MSK.23.41_GCF_013303535.1__r33c1__ctg33_17		GCF_013303535.1/c00033_NZ_JAAI...region001_14 # 10595 # 10753 # -1 # ID=4729_14;partial=00;start_type=ATG;rbs_motif=AGGAG;rbs_spacer=5-10bp;gc_cont=0.321	Y
[Ruminococcus]_gnavus_MSK.23.41_GCF_013303535.1	Firmicutes	Clostridia	Eubacteriales	Lachnospiraceae	Mediterraneibacter	r43c1	cyclic-lactone-autoinducer	c00043_NZ_JAAI...region001.gbk	1	13151	13151	13	0	13151	[Ruminococcus]_gnavus_MSK.23.41_GCF_013303535.1__r43c1__ctg43_4				N
[Ruminococcus]_gnavus_MSK.23.41_GCF_013303535.1	Firmicutes	Clostridia	Eubacteriales	Lachnospiraceae	Mediterraneibacter	r63c1	cyclic-lactone-autoinducer	c00063_NZ_JAAI...region001.gbk	1	11286	11286	10	0	11286		[Ruminococcus]_gnavus_MSK.23.41_GCF_013303535.1__r63c1__ctg63_2			Y
[Ruminococcus]_gnavus_MSK.23.41_GCF_013303535.1	Firmicutes	Clostridia	Eubacteriales	Lachnospiraceae	Mediterraneibacter	r82c1	cyclic-lactone-autoinducer	c00082_NZ_JAAI...region001.gbk	1	7039	7039	8	0	7039	[Ruminococcus]_gnavus_MSK.23.41_GCF_013303535.1__r82c1__ctg82_3				N
[Ruminococcus]_gnavus_MSK.23.43_GCF_013303475.1	Firmicutes	Clostridia	Eubacteriales	Lachnospiraceae	Mediterraneibacter	r44c1	cyclic-lactone-autoinducer,lanthipeptide-class-ii	c00044_NZ_JAAI...region001.gbk	2538	32892	30355	36	2537	23290	[Ruminococcus]_gnavus_MSK.23.43_GCF_013303475.1__r44c1__ctg44_16	[Ruminococcus]_gnavus_MSK.23.43_GCF_013303475.1__r44c1__ctg44_17		GCF_013303475.1/c00044_NZ_JAAI...region001_14 # 10595 # 10753 # -1 # ID=4730_14;partial=00;start_type=ATG;rbs_motif=AGGAG;rbs_spacer=5-10bp;gc_cont=0.321	Y
[Ruminococcus]_gnavus_MSK.23.43_GCF_013303475.1	Firmicutes	Clostridia	Eubacteriales	Lachnospiraceae	Mediterraneibacter	r56c2	cyclic-lactone-autoinducer	c00056_NZ_JAAI...region002.gbk	31004	44154	13151	13	31003	44154	[Ruminococcus]_gnavus_MSK.23.43_GCF_013303475.1__r56c2__ctg56_35				N
[Ruminococcus]_gnavus_MSK.23.43_GCF_013303475.1	Firmicutes	Clostridia	Eubacteriales	Lachnospiraceae	Mediterraneibacter	r78c1	cyclic-lactone-autoinducer	c00078_NZ_JAAI...region001.gbk	1	11286	11286	10	0	11286		[Ruminococcus]_gnavus_MSK.23.43_GCF_013303475.1__r78c1__ctg78_2			Y
[Ruminococcus]_gnavus_MSK.23.43_GCF_013303475.1	Firmicutes	Clostridia	Eubacteriales	Lachnospiraceae	Mediterraneibacter	r97c1	cyclic-lactone-autoinducer	c00097_NZ_JAAI...region001.gbk	1	7039	7039	8	0	7039	[Ruminococcus]_gnavus_MSK.23.43_GCF_013303475.1__r97c1__ctg97_3				N
[Ruminococcus]_gnavus_MSK.23.46_GCF_013303495.1	Firmicutes	Clostridia	Eubacteriales	Lachnospiraceae	Mediterraneibacter	r55c1	cyclic-lactone-autoinducer	c00055_NZ_JAAI...region001.gbk	45372	60331	14960	18	45371	60331	[Ruminococcus]_gnavus_MSK.23.46_GCF_013303495.1__r55c1__ctg55_62				N
[Ruminococcus]_gnavus_MSK.23.55_GCF_013303465.1	Firmicutes	Clostridia	Eubacteriales	Lachnospiraceae	Mediterraneibacter	r44c1	cyclic-lactone-autoinducer	c00044_NZ_JAAI...region001.gbk	45372	60331	14960	18	45371	60331	[Ruminococcus]_gnavus_MSK.23.55_GCF_013303465.1__r44c1__ctg44_62				N
[Ruminococcus]_gnavus_MSK.23.60_GCF_013303425.1	Firmicutes	Clostridia	Eubacteriales	Lachnospiraceae	Mediterraneibacter	r114c1	cyclic-lactone-autoinducer	c00114_NZ_JAAI...region001.gbk	1	7037	7037	8	0	7037	[Ruminococcus]_gnavus_MSK.23.60_GCF_013303425.1__r114c1__ctg114_3				N
[Ruminococcus]_gnavus_MSK.23.60_GCF_013303425.1	Firmicutes	Clostridia	Eubacteriales	Lachnospiraceae	Mediterraneibacter	r57c1	cyclic-lactone-autoinducer,lanthipeptide-class-ii	c00057_NZ_JAAI...region001.gbk	2537	32891	30355	36	2536	23289	[Ruminococcus]_gnavus_MSK.23.60_GCF_013303425.1__r57c1__ctg57_16	[Ruminococcus]_gnavus_MSK.23.60_GCF_013303425.1__r57c1__ctg57_17		GCF_013303425.1/c00057_NZ_JAAI...region001_14 # 10595 # 10753 # -1 # ID=4731_14;partial=00;start_type=ATG;rbs_motif=AGGAG;rbs_spacer=5-10bp;gc_cont=0.321	Y
[Ruminococcus]_gnavus_MSK.23.60_GCF_013303425.1	Firmicutes	Clostridia	Eubacteriales	Lachnospiraceae	Mediterraneibacter	r70c2	cyclic-lactone-autoinducer	c00070_NZ_JAAI...region002.gbk	31004	44152	13149	13	31003	44152	[Ruminococcus]_gnavus_MSK.23.60_GCF_013303425.1__r70c2__ctg70_35				N
[Ruminococcus]_gnavus_MSK.23.60_GCF_013303425.1	Firmicutes	Clostridia	Eubacteriales	Lachnospiraceae	Mediterraneibacter	r92c1	cyclic-lactone-autoinducer	c00092_NZ_JAAI...region001.gbk	1	11286	11286	10	0	11286		[Ruminococcus]_gnavus_MSK.23.60_GCF_013303425.1__r92c1__ctg92_2			Y
[Ruminococcus]_gnavus_MSK.23.61_GCF_013303395.1	Firmicutes	Clostridia	Eubacteriales	Lachnospiraceae	Mediterraneibacter	r43c1	cyclic-lactone-autoinducer	c00043_NZ_JAAI...region001.gbk	45372	60331	14960	18	45371	60331	[Ruminococcus]_gnavus_MSK.23.61_GCF_013303395.1__r43c1__ctg43_62				N
[Ruminococcus]_gnavus_MSK.23.62_GCF_013303385.1	Firmicutes	Clostridia	Eubacteriales	Lachnospiraceae	Mediterraneibacter	r43c1	cyclic-lactone-autoinducer,lanthipeptide-class-ii	c00043_NZ_JAAI...region001.gbk	2538	32892	30355	36	2537	23290	[Ruminococcus]_gnavus_MSK.23.62_GCF_013303385.1__r43c1__ctg43_16	[Ruminococcus]_gnavus_MSK.23.62_GCF_013303385.1__r43c1__ctg43_17		GCF_013303385.1/c00043_NZ_JAAI...region001_14 # 10595 # 10753 # -1 # ID=4790_14;partial=00;start_type=ATG;rbs_motif=AGGAG;rbs_spacer=5-10bp;gc_cont=0.321	Y
[Ruminococcus]_gnavus_MSK.23.62_GCF_013303385.1	Firmicutes	Clostridia	Eubacteriales	Lachnospiraceae	Mediterraneibacter	r53c2	cyclic-lactone-autoinducer	c00053_NZ_JAAI...region002.gbk	31004	44154	13151	13	31003	44154	[Ruminococcus]_gnavus_MSK.23.62_GCF_013303385.1__r53c2__ctg53_35				N
[Ruminococcus]_gnavus_MSK.23.62_GCF_013303385.1	Firmicutes	Clostridia	Eubacteriales	Lachnospiraceae	Mediterraneibacter	r78c1	cyclic-lactone-autoinducer	c00078_NZ_JAAI...region001.gbk	1	11286	11286	10	0	11286		[Ruminococcus]_gnavus_MSK.23.62_GCF_013303385.1__r78c1__ctg78_2			Y
[Ruminococcus]_gnavus_MSK.23.62_GCF_013303385.1	Firmicutes	Clostridia	Eubacteriales	Lachnospiraceae	Mediterraneibacter	r96c1	cyclic-lactone-autoinducer	c00096_NZ_JAAI...region001.gbk	1	7039	7039	8	0	7039	[Ruminococcus]_gnavus_MSK.23.62_GCF_013303385.1__r96c1__ctg96_3				N
[Ruminococcus]_gnavus_MSK.23.63_GCF_013303345.1	Firmicutes	Clostridia	Eubacteriales	Lachnospiraceae	Mediterraneibacter	r46c1	cyclic-lactone-autoinducer	c00046_NZ_JAAI...region001.gbk	45372	60331	14960	18	45371	60331	[Ruminococcus]_gnavus_MSK.23.63_GCF_013303345.1__r46c1__ctg46_62				N
[Ruminococcus]_gnavus_MSK.23.71_GCF_013303355.1	Firmicutes	Clostridia	Eubacteriales	Lachnospiraceae	Mediterraneibacter	r46c1	cyclic-lactone-autoinducer	c00046_NZ_JAAI...region001.gbk	45372	60331	14960	18	45371	60331	[Ruminococcus]_gnavus_MSK.23.71_GCF_013303355.1__r46c1__ctg46_62				N
[Ruminococcus]_gnavus_MSK.23.81_GCF_013303295.1	Firmicutes	Clostridia	Eubacteriales	Lachnospiraceae	Mediterraneibacter	r34c1	cyclic-lactone-autoinducer,lanthipeptide-class-ii	c00034_NZ_JAAI...region001.gbk	2538	32892	30355	36	2537	23290	[Ruminococcus]_gnavus_MSK.23.81_GCF_013303295.1__r34c1__ctg34_16	[Ruminococcus]_gnavus_MSK.23.81_GCF_013303295.1__r34c1__ctg34_17		GCF_013303295.1/c00034_NZ_JAAI...region001_14 # 10595 # 10753 # -1 # ID=4791_14;partial=00;start_type=ATG;rbs_motif=AGGAG;rbs_spacer=5-10bp;gc_cont=0.321	Y
[Ruminococcus]_gnavus_MSK.23.81_GCF_013303295.1	Firmicutes	Clostridia	Eubacteriales	Lachnospiraceae	Mediterraneibacter	r43c2	cyclic-lactone-autoinducer	c00043_NZ_JAAI...region002.gbk	31004	44154	13151	13	31003	44154	[Ruminococcus]_gnavus_MSK.23.81_GCF_013303295.1__r43c2__ctg43_35				N
[Ruminococcus]_gnavus_MSK.23.81_GCF_013303295.1	Firmicutes	Clostridia	Eubacteriales	Lachnospiraceae	Mediterraneibacter	r64c1	cyclic-lactone-autoinducer	c00064_NZ_JAAI...region001.gbk	1	11285	11285	11	0	11285		[Ruminococcus]_gnavus_MSK.23.81_GCF_013303295.1__r64c1__ctg64_3			Y
[Ruminococcus]_gnavus_MSK.23.81_GCF_013303295.1	Firmicutes	Clostridia	Eubacteriales	Lachnospiraceae	Mediterraneibacter	r84c1	cyclic-lactone-autoinducer	c00084_NZ_JAAI...region001.gbk	1	7039	7039	8	0	7039	[Ruminococcus]_gnavus_MSK.23.81_GCF_013303295.1__r84c1__ctg84_3				N
[Ruminococcus]_gnavus_MSK.23.82_GCF_013303245.1	Firmicutes	Clostridia	Eubacteriales	Lachnospiraceae	Mediterraneibacter	r45c1	cyclic-lactone-autoinducer,lanthipeptide-class-ii	c00045_NZ_JAAI...region001.gbk	2538	32892	30355	36	2537	23290	[Ruminococcus]_gnavus_MSK.23.82_GCF_013303245.1__r45c1__ctg45_16	[Ruminococcus]_gnavus_MSK.23.82_GCF_013303245.1__r45c1__ctg45_17		GCF_013303245.1/c00045_NZ_JAAI...region001_14 # 10595 # 10753 # -1 # ID=5351_14;partial=00;start_type=ATG;rbs_motif=AGGAG;rbs_spacer=5-10bp;gc_cont=0.321	Y
[Ruminococcus]_gnavus_MSK.23.82_GCF_013303245.1	Firmicutes	Clostridia	Eubacteriales	Lachnospiraceae	Mediterraneibacter	r57c2	cyclic-lactone-autoinducer	c00057_NZ_JAAI...region002.gbk	31004	44152	13149	13	31003	44152	[Ruminococcus]_gnavus_MSK.23.82_GCF_013303245.1__r57c2__ctg57_35				N
[Ruminococcus]_gnavus_MSK.23.82_GCF_013303245.1	Firmicutes	Clostridia	Eubacteriales	Lachnospiraceae	Mediterraneibacter	r79c1	cyclic-lactone-autoinducer	c00079_NZ_JAAI...region001.gbk	1	11286	11286	10	0	11286		[Ruminococcus]_gnavus_MSK.23.82_GCF_013303245.1__r79c1__ctg79_2			Y
[Ruminococcus]_gnavus_MSK.23.82_GCF_013303245.1	Firmicutes	Clostridia	Eubacteriales	Lachnospiraceae	Mediterraneibacter	r98c1	cyclic-lactone-autoinducer	c00098_NZ_JAAI...region001.gbk	1	7037	7037	8	0	7037	[Ruminococcus]_gnavus_MSK.23.82_GCF_013303245.1__r98c1__ctg98_3				N
[Ruminococcus]_gnavus_MSK.23.91_GCF_013299885.1	Firmicutes	Clostridia	Eubacteriales	Lachnospiraceae	Mediterraneibacter	r44c1	cyclic-lactone-autoinducer,lanthipeptide-class-ii	c00044_NZ_JAAI...region001.gbk	2538	32892	30355	36	2537	23290	[Ruminococcus]_gnavus_MSK.23.91_GCF_013299885.1__r44c1__ctg44_16	[Ruminococcus]_gnavus_MSK.23.91_GCF_013299885.1__r44c1__ctg44_17		GCF_013299885.1/c00044_NZ_JAAI...region001_14 # 10595 # 10753 # -1 # ID=9557_14;partial=00;start_type=ATG;rbs_motif=AGGAG;rbs_spacer=5-10bp;gc_cont=0.321	Y
[Ruminococcus]_gnavus_MSK.23.91_GCF_013299885.1	Firmicutes	Clostridia	Eubacteriales	Lachnospiraceae	Mediterraneibacter	r55c1	cyclic-lactone-autoinducer	c00055_NZ_JAAI...region001.gbk	1	13151	13151	13	0	13151	[Ruminococcus]_gnavus_MSK.23.91_GCF_013299885.1__r55c1__ctg55_4				N
[Ruminococcus]_gnavus_MSK.23.91_GCF_013299885.1	Firmicutes	Clostridia	Eubacteriales	Lachnospiraceae	Mediterraneibacter	r76c1	cyclic-lactone-autoinducer	c00076_NZ_JAAI...region001.gbk	1	11286	11286	10	0	11286		[Ruminococcus]_gnavus_MSK.23.91_GCF_013299885.1__r76c1__ctg76_2			Y
[Ruminococcus]_gnavus_MSK.23.91_GCF_013299885.1	Firmicutes	Clostridia	Eubacteriales	Lachnospiraceae	Mediterraneibacter	r94c1	cyclic-lactone-autoinducer	c00094_NZ_JAAI...region001.gbk	1	7039	7039	8	0	7039	[Ruminococcus]_gnavus_MSK.23.91_GCF_013299885.1__r94c1__ctg94_3				N
[Ruminococcus]_gnavus_MSK.23.92_GCF_013303325.1	Firmicutes	Clostridia	Eubacteriales	Lachnospiraceae	Mediterraneibacter	r43c1	cyclic-lactone-autoinducer,lanthipeptide-class-ii	c00043_NZ_JAAI...region001.gbk	2538	32892	30355	36	2537	23290	[Ruminococcus]_gnavus_MSK.23.92_GCF_013303325.1__r43c1__ctg43_16	[Ruminococcus]_gnavus_MSK.23.92_GCF_013303325.1__r43c1__ctg43_17		GCF_013303325.1/c00043_NZ_JAAI...region001_14 # 10595 # 10753 # -1 # ID=9558_14;partial=00;start_type=ATG;rbs_motif=AGGAG;rbs_spacer=5-10bp;gc_cont=0.321	Y
[Ruminococcus]_gnavus_MSK.23.92_GCF_013303325.1	Firmicutes	Clostridia	Eubacteriales	Lachnospiraceae	Mediterraneibacter	r54c1	cyclic-lactone-autoinducer	c00054_NZ_JAAI...region001.gbk	1	13149	13149	13	0	13149	[Ruminococcus]_gnavus_MSK.23.92_GCF_013303325.1__r54c1__ctg54_4				N
[Ruminococcus]_gnavus_MSK.23.92_GCF_013303325.1	Firmicutes	Clostridia	Eubacteriales	Lachnospiraceae	Mediterraneibacter	r75c1	cyclic-lactone-autoinducer	c00075_NZ_JAAI...region001.gbk	1	11285	11285	11	0	11285		[Ruminococcus]_gnavus_MSK.23.92_GCF_013303325.1__r75c1__ctg75_3			Y
[Ruminococcus]_gnavus_MSK.23.92_GCF_013303325.1	Firmicutes	Clostridia	Eubacteriales	Lachnospiraceae	Mediterraneibacter	r94c1	cyclic-lactone-autoinducer	c00094_NZ_JAAI...region001.gbk	1	7039	7039	8	0	7039	[Ruminococcus]_gnavus_MSK.23.92_GCF_013303325.1__r94c1__ctg94_3				N
[Ruminococcus]_gnavus_MSK.23.93_GCF_013303255.1	Firmicutes	Clostridia	Eubacteriales	Lachnospiraceae	Mediterraneibacter	r43c1	cyclic-lactone-autoinducer	c00043_NZ_JAAI...region001.gbk	45372	60331	14960	18	45371	60331	[Ruminococcus]_gnavus_MSK.23.93_GCF_013303255.1__r43c1__ctg43_62				N
[Ruminococcus]_gnavus_MSK.5.17_GCF_013299825.1	Firmicutes	Clostridia	Eubacteriales	Lachnospiraceae	Mediterraneibacter	r11c1	NRPS,cyclic-lactone-autoinducer	c00011_NZ_JAAI...region001.gbk	17006	57914	40909	22	23136	43894	[Ruminococcus]_gnavus_MSK.5.17_GCF_013299825.1__r11c1__ctg11_20	[Ruminococcus]_gnavus_MSK.5.17_GCF_013299825.1__r11c1__ctg11_19		GCF_013299825.1/c00011_NZ_JAAI...region001_10 # 16132 # 16290 # 1 # ID=9559_10;partial=00;start_type=ATG;rbs_motif=AGGAGG;rbs_spacer=5-10bp;gc_cont=0.421	Y
[Ruminococcus]_gnavus_MSK.5.17_GCF_013299825.1	Firmicutes	Clostridia	Eubacteriales	Lachnospiraceae	Mediterraneibacter	r35c1	cyclic-lactone-autoinducer,lanthipeptide-class-i	c00035_NZ_JAAI...region001.gbk	1	20888	20888	28	0	18382	[Ruminococcus]_gnavus_MSK.5.17_GCF_013299825.1__r35c1__ctg35_13	[Ruminococcus]_gnavus_MSK.5.17_GCF_013299825.1__r35c1__ctg35_14		GCF_013299825.1/c00035_NZ_JAAI...region001_11 # 8233 # 8382 # -1 # ID=9560_11;partial=00;start_type=ATG;rbs_motif=AGGAG;rbs_spacer=5-10bp;gc_cont=0.360	Y
[Ruminococcus]_gnavus_MSK.5.19_GCF_013299595.1	Firmicutes	Clostridia	Eubacteriales	Lachnospiraceae	Mediterraneibacter	r50c1	cyclic-lactone-autoinducer	c00050_NZ_JAAI...region001.gbk	1	13939	13939	15	0	13939	[Ruminococcus]_gnavus_MSK.5.19_GCF_013299595.1__r50c1__ctg50_11				N
[Ruminococcus]_gnavus_RJX1120_GCF_002865405.1	Firmicutes	Clostridia	Eubacteriales	Lachnospiraceae	Mediterraneibacter	r61c1	cyclic-lactone-autoinducer	NZ_NIHO01000047.region001.gbk	1	20118	20118	22	0	20118	[Ruminococcus]_gnavus_RJX1120_GCF_002865405.1__r61c1__ctg61_10				N
[Ruminococcus]_gnavus_RJX1122_GCF_002865425.1	Firmicutes	Clostridia	Eubacteriales	Lachnospiraceae	Mediterraneibacter	r18c1	cyclic-lactone-autoinducer	NZ_NIHQ01000025.region001.gbk	13960	27199	13240	16	13959	27199	[Ruminococcus]_gnavus_RJX1122_GCF_002865425.1__r18c1__ctg18_34				N
[Ruminococcus]_gnavus_RJX1125_GCF_002865345.1	Firmicutes	Clostridia	Eubacteriales	Lachnospiraceae	Mediterraneibacter	r72c1	cyclic-lactone-autoinducer	NZ_NIHT01000008.region001.gbk	9254	29221	19968	24	9253	29221	[Ruminococcus]_gnavus_RJX1125_GCF_002865345.1__r72c1__ctg72_24				N
[Ruminococcus]_gnavus_RJX1125_GCF_002865345.1	Firmicutes	Clostridia	Eubacteriales	Lachnospiraceae	Mediterraneibacter	r72c2	cyclic-lactone-autoinducer,lanthipeptide-class-ii	NZ_NIHT01000008.region002.gbk	107786	139914	32129	31	121068	139914	[Ruminococcus]_gnavus_RJX1125_GCF_002865345.1__r72c2__ctg72_134	[Ruminococcus]_gnavus_RJX1125_GCF_002865345.1__r72c2__ctg72_135		GCF_002865345.1/NZ_NIHT01000008.region002_23 # 23889 # 24032 # -1 # ID=10369_23;partial=00;start_type=ATG;rbs_motif=AGGAG;rbs_spacer=5-10bp;gc_cont=0.292	Y
[Ruminococcus]_gnavus_RJX1126_GCF_002865305.1	Firmicutes	Clostridia	Eubacteriales	Lachnospiraceae	Mediterraneibacter	r17c1	cyclic-lactone-autoinducer	NZ_NIHU01000024.region001.gbk	41192	53347	12156	14	41191	53347	[Ruminococcus]_gnavus_RJX1126_GCF_002865305.1__r17c1__ctg17_70				N
[Ruminococcus]_gnavus_RJX1127_GCF_002865385.1	Firmicutes	Clostridia	Eubacteriales	Lachnospiraceae	Mediterraneibacter	r4c1	cyclic-lactone-autoinducer	NZ_NIHV01000012.region001.gbk	62253	82798	20546	20	62252	82798	[Ruminococcus]_gnavus_RJX1127_GCF_002865385.1__r4c1__ctg4_71				N
[Ruminococcus]_gnavus_Ruminococcus_gnavus_TS_8243C_mod2_GCF_902167785.1	Firmicutes	Clostridia	Eubacteriales	Lachnospiraceae	Mediterraneibacter	r106c1	RRE-containing,cyclic-lactone-autoinducer	c00106_NZ_CABH...region001.gbk	52425	85753	33329	28	52424	75710	[Ruminococcus]_gnavus_Ruminococcus_gnavus_TS_8243C_mod2_GCF_902167785.1__r106c1__ctg106_63	[Ruminococcus]_gnavus_Ruminococcus_gnavus_TS_8243C_mod2_GCF_902167785.1__r106c1__ctg106_67		GCF_902167785.1/c00106_NZ_CABH...region001_16 # 13137 # 13286 # -1 # ID=10370_16;partial=00;start_type=ATG;rbs_motif=AGGAG;rbs_spacer=5-10bp;gc_cont=0.267	Y
[Ruminococcus]_gnavus_Ruminococcus_gnavus_TS_8243C_mod2_GCF_902167785.1	Firmicutes	Clostridia	Eubacteriales	Lachnospiraceae	Mediterraneibacter	r54c1	cyclic-lactone-autoinducer	c00054_NZ_CABH...region001.gbk	15256	27643	12388	14	15255	27643	[Ruminococcus]_gnavus_Ruminococcus_gnavus_TS_8243C_mod2_GCF_902167785.1__r54c1__ctg54_23	[Ruminococcus]_gnavus_Ruminococcus_gnavus_TS_8243C_mod2_GCF_902167785.1__r54c1__ctg54_22		GCF_902167785.1/c00054_NZ_CABH...region001_10 # 10001 # 10150 # 1 # ID=10371_10;partial=00;start_type=ATG;rbs_motif=AGGAG;rbs_spacer=5-10bp;gc_cont=0.313	Y
[Ruminococcus]_gnavus_TM04-16_GCF_003436535.1	Firmicutes	Clostridia	Eubacteriales	Lachnospiraceae	Mediterraneibacter	r19c1	cyclic-lactone-autoinducer	NZ_QSPZ01000026.region001.gbk	28183	46570	18388	22	28182	46570	[Ruminococcus]_gnavus_TM04-16_GCF_003436535.1__r19c1__ctg19_52				N
[Ruminococcus]_lactaris_D43t1_170807_H11_GCF_015560615.1	Firmicutes	Clostridia	Eubacteriales	Lachnospiraceae	Mediterraneibacter	r180c1	cyclic-lactone-autoinducer	c00180_NZ_JADM...region001.gbk	1	1206	1206	2	0	1206	[Ruminococcus]_lactaris_D43t1_170807_H11_GCF_015560615.1__r180c1__ctg180_1				N
[Ruminococcus]_lactaris_D43t1_170807_H11_GCF_015560615.1	Firmicutes	Clostridia	Eubacteriales	Lachnospiraceae	Mediterraneibacter	r76c1	cyclic-lactone-autoinducer	c00076_NZ_JADM...region001.gbk	1	3915	3915	6	0	3915		[Ruminococcus]_lactaris_D43t1_170807_H11_GCF_015560615.1__r76c1__ctg76_3			Y
[Ruminococcus]_lactaris_TF11-7_GCF_003436725.1	Firmicutes	Clostridia	Eubacteriales	Lachnospiraceae	Mediterraneibacter	r81c1	cyclic-lactone-autoinducer	NZ_QSQN01000082.region001.gbk	1	1153	1153	2	0	1153	[Ruminococcus]_lactaris_TF11-7_GCF_003436725.1__r81c1__ctg81_2	[Ruminococcus]_lactaris_TF11-7_GCF_003436725.1__r81c1__ctg81_1		GCF_003436725.1/NZ_QSQN01000082.region001_1 # 261 # 440 # 1 # ID=10373_1;partial=00;start_type=ATG;rbs_motif=GGA/GAG/AGG;rbs_spacer=5-10bp;gc_cont=0.289	Y
[Ruminococcus]_torques_2789STDY5608833_GCF_001405415.1	Firmicutes	Clostridia	Eubacteriales	Lachnospiraceae	Mediterraneibacter	r3c1	NRPS,cyclic-lactone-autoinducer	NZ_CZBR01000003.region001.gbk	28216	77190	48975	41	51330	72082	[Ruminococcus]_torques_2789STDY5608833_GCF_001405415.1__r3c1__ctg3_63	[Ruminococcus]_torques_2789STDY5608833_GCF_001405415.1__r3c1__ctg3_64		GCF_001405415.1/NZ_CZBR01000003.region001_34 # 33712 # 33867 # -1 # ID=13571_34;partial=00;start_type=ATG;rbs_motif=AGGAGG;rbs_spacer=5-10bp;gc_cont=0.359	Y
[Ruminococcus]_torques_2789STDY5834841_GCF_001405315.1	Firmicutes	Clostridia	Eubacteriales	Lachnospiraceae	Mediterraneibacter	r21c1	cyclic-lactone-autoinducer	NZ_CYZO01000021.region001.gbk	18281	38990	20710	16	18280	38990	[Ruminococcus]_torques_2789STDY5834841_GCF_001405315.1__r21c1__ctg21_23	[Ruminococcus]_torques_2789STDY5834841_GCF_001405315.1__r21c1__ctg21_22		GCF_001405315.1/NZ_CYZO01000021.region001_9 # 10001 # 10144 # 1 # ID=13572_9;partial=00;start_type=ATG;rbs_motif=GGAG/GAGG;rbs_spacer=5-10bp;gc_cont=0.333	Y
[Ruminococcus]_torques_2789STDY5834889_GCF_001406755.1	Firmicutes	Clostridia	Eubacteriales	Lachnospiraceae	Mediterraneibacter	r7c1	cyclic-lactone-autoinducer	NZ_CZBX01000007.region001.gbk	1	19505	19505	28	0	19505	[Ruminococcus]_torques_2789STDY5834889_GCF_001406755.1__r7c1__ctg7_14	[Ruminococcus]_torques_2789STDY5834889_GCF_001406755.1__r7c1__ctg7_15		GCF_001406755.1/NZ_CZBX01000007.region001_15 # 9332 # 9505 # -1 # ID=10384_15;partial=00;start_type=ATG;rbs_motif=GGA/GAG/AGG;rbs_spacer=5-10bp;gc_cont=0.305	Y
[Ruminococcus]_torques_aa_0143_GCF_004167165.1	Firmicutes	Clostridia	Eubacteriales	Lachnospiraceae	Mediterraneibacter	r47c1	cyclic-lactone-autoinducer	NZ_RCYR01000047.region001.gbk	844	13108	12265	12	843	13108	[Ruminococcus]_torques_aa_0143_GCF_004167165.1__r47c1__ctg47_12	[Ruminococcus]_torques_aa_0143_GCF_004167165.1__r47c1__ctg47_13		GCF_004167165.1/NZ_RCYR01000047.region001_11 # 10567 # 10710 # -1 # ID=13628_11;partial=00;start_type=ATG;rbs_motif=GGAG/GAGG;rbs_spacer=5-10bp;gc_cont=0.340	Y
[Ruminococcus]_torques_AM22-16_GCF_003470435.1	Firmicutes	Clostridia	Eubacteriales	Lachnospiraceae	Mediterraneibacter	r44c1	cyclic-lactone-autoinducer	NZ_QRIH01000049.region001.gbk	1	14715	14715	13	0	14715	[Ruminococcus]_torques_AM22-16_GCF_003470435.1__r44c1__ctg44_7	[Ruminococcus]_torques_AM22-16_GCF_003470435.1__r44c1__ctg44_6		GCF_003470435.1/NZ_QRIH01000049.region001_6 # 7524 # 7667 # 1 # ID=13629_6;partial=00;start_type=ATG;rbs_motif=GGAG/GAGG;rbs_spacer=5-10bp;gc_cont=0.333	Y
[Ruminococcus]_torques_ATCC_27756_GCF_000153925.1	Firmicutes	Clostridia	Eubacteriales	Lachnospiraceae	Mediterraneibacter	r17c1	cyclic-lactone-autoinducer	NZ_DS264359.1.region001.gbk	25099	45808	20710	18	25098	45808	[Ruminococcus]_torques_ATCC_27756_GCF_000153925.1__r17c1__ctg17_28	[Ruminococcus]_torques_ATCC_27756_GCF_000153925.1__r17c1__ctg17_27		GCF_000153925.1/NZ_DS264359.1.region001_11 # 10001 # 10144 # 1 # ID=13630_11;partial=00;start_type=ATG;rbs_motif=GGAG/GAGG;rbs_spacer=5-10bp;gc_cont=0.333	Y
[Ruminococcus]_torques_BIOML-A1_GCF_009718265.1	Firmicutes	Clostridia	Eubacteriales	Lachnospiraceae	Mediterraneibacter	r35c1	cyclic-lactone-autoinducer	NZ_WNAE01000041.region001.gbk	1	10831	10831	12	0	10831	[Ruminococcus]_torques_BIOML-A1_GCF_009718265.1__r35c1__ctg35_10	[Ruminococcus]_torques_BIOML-A1_GCF_009718265.1__r35c1__ctg35_11		GCF_009718265.1/NZ_WNAE01000041.region001_11 # 9084 # 9227 # -1 # ID=14400_11;partial=00;start_type=ATG;rbs_motif=GGAG/GAGG;rbs_spacer=5-10bp;gc_cont=0.340	Y
[Ruminococcus]_torques_BIOML-A2_GCF_009718255.1	Firmicutes	Clostridia	Eubacteriales	Lachnospiraceae	Mediterraneibacter	r36c1	cyclic-lactone-autoinducer	NZ_WNAD01000042.region001.gbk	844	13157	12314	12	843	13157	[Ruminococcus]_torques_BIOML-A2_GCF_009718255.1__r36c1__ctg36_12	[Ruminococcus]_torques_BIOML-A2_GCF_009718255.1__r36c1__ctg36_13		GCF_009718255.1/NZ_WNAD01000042.region001_11 # 10567 # 10710 # -1 # ID=14430_11;partial=00;start_type=ATG;rbs_motif=GGAG/GAGG;rbs_spacer=5-10bp;gc_cont=0.340	Y
[Ruminococcus]_torques_BIOML-A3_GCF_009718205.1	Firmicutes	Clostridia	Eubacteriales	Lachnospiraceae	Mediterraneibacter	r36c1	cyclic-lactone-autoinducer	NZ_WNAC01000042.region001.gbk	844	13157	12314	12	843	13157	[Ruminococcus]_torques_BIOML-A3_GCF_009718205.1__r36c1__ctg36_12	[Ruminococcus]_torques_BIOML-A3_GCF_009718205.1__r36c1__ctg36_13		GCF_009718205.1/NZ_WNAC01000042.region001_11 # 10567 # 10710 # -1 # ID=14486_11;partial=00;start_type=ATG;rbs_motif=GGAG/GAGG;rbs_spacer=5-10bp;gc_cont=0.340	Y
[Ruminococcus]_torques_BIOML-A4_GCF_009718245.1	Firmicutes	Clostridia	Eubacteriales	Lachnospiraceae	Mediterraneibacter	r41c1	cyclic-lactone-autoinducer	NZ_WNAB01000045.region001.gbk	2214	14527	12314	12	2213	14527	[Ruminococcus]_torques_BIOML-A4_GCF_009718245.1__r41c1__ctg41_13	[Ruminococcus]_torques_BIOML-A4_GCF_009718245.1__r41c1__ctg41_14		GCF_009718245.1/NZ_WNAB01000045.region001_11 # 10567 # 10710 # -1 # ID=14469_11;partial=00;start_type=ATG;rbs_motif=GGAG/GAGG;rbs_spacer=5-10bp;gc_cont=0.340	Y
[Ruminococcus]_torques_BIOML-A5_GCF_009718215.1	Firmicutes	Clostridia	Eubacteriales	Lachnospiraceae	Mediterraneibacter	r39c1	cyclic-lactone-autoinducer	NZ_WNAA01000045.region001.gbk	844	13108	12265	12	843	13108	[Ruminococcus]_torques_BIOML-A5_GCF_009718215.1__r39c1__ctg39_12	[Ruminococcus]_torques_BIOML-A5_GCF_009718215.1__r39c1__ctg39_13		GCF_009718215.1/NZ_WNAA01000045.region001_11 # 10567 # 10710 # -1 # ID=14470_11;partial=00;start_type=ATG;rbs_motif=GGAG/GAGG;rbs_spacer=5-10bp;gc_cont=0.340	Y
[Ruminococcus]_torques_BIOML-A6_GCF_009718155.1	Firmicutes	Clostridia	Eubacteriales	Lachnospiraceae	Mediterraneibacter	r40c1	cyclic-lactone-autoinducer	NZ_WMZZ01000037.region001.gbk	12780	33489	20710	18	12779	33489	[Ruminococcus]_torques_BIOML-A6_GCF_009718155.1__r40c1__ctg40_19	[Ruminococcus]_torques_BIOML-A6_GCF_009718155.1__r40c1__ctg40_18		GCF_009718155.1/NZ_WMZZ01000037.region001_9 # 10001 # 10144 # 1 # ID=14495_9;partial=00;start_type=ATG;rbs_motif=GGAG/GAGG;rbs_spacer=5-10bp;gc_cont=0.333	Y
[Ruminococcus]_torques_BIOML-A7_GCF_009718165.1	Firmicutes	Clostridia	Eubacteriales	Lachnospiraceae	Mediterraneibacter	r40c1	cyclic-lactone-autoinducer	NZ_WMZY01000044.region001.gbk	844	13157	12314	12	843	13157	[Ruminococcus]_torques_BIOML-A7_GCF_009718165.1__r40c1__ctg40_12	[Ruminococcus]_torques_BIOML-A7_GCF_009718165.1__r40c1__ctg40_13		GCF_009718165.1/NZ_WMZY01000044.region001_11 # 10567 # 10710 # -1 # ID=14505_11;partial=00;start_type=ATG;rbs_motif=GGAG/GAGG;rbs_spacer=5-10bp;gc_cont=0.340	Y
[Ruminococcus]_torques_L2-14_GCF_000210035.1	Firmicutes	Clostridia	Eubacteriales	Lachnospiraceae	Mediterraneibacter	r1c2	NRPS,cyclic-lactone-autoinducer	NC_021015.1.region002.gbk	1154687	1207770	53084	42	1160936	1172877	[Ruminococcus]_torques_L2-14_GCF_000210035.1__r1c2__ctg1_1090	[Ruminococcus]_torques_L2-14_GCF_000210035.1__r1c2__ctg1_1089		GCF_000210035.1/NC_021015.1.region002_9 # 14337 # 14495 # 1 # ID=14728_9;partial=00;start_type=ATG;rbs_motif=AGGAGG;rbs_spacer=5-10bp;gc_cont=0.415	Y
[Ruminococcus]_torques_L2-14_GCF_000210035.1	Firmicutes	Clostridia	Eubacteriales	Lachnospiraceae	Mediterraneibacter	r1c3	NRPS,cyclic-lactone-autoinducer	NC_021015.1.region003.gbk	1245527	1308929	63403	50	1288199	1308929	[Ruminococcus]_torques_L2-14_GCF_000210035.1__r1c3__ctg1_1186	[Ruminococcus]_torques_L2-14_GCF_000210035.1__r1c3__ctg1_1185			Y
[Ruminococcus]_torques_MGYG-HGUT-00249_GCF_902364725.1	Firmicutes	Clostridia	Eubacteriales	Lachnospiraceae	Mediterraneibacter	r2c1	NRPS,RRE-containing,cyclic-lactone-autoinducer	c00002_NZ_CABJ...region001.gbk	124338	200682	76345	66	138272	159002	[Ruminococcus]_torques_MGYG-HGUT-00249_GCF_902364725.1__r2c1__ctg2_143	[Ruminococcus]_torques_MGYG-HGUT-00249_GCF_902364725.1__r2c1__ctg2_144			Y
Absiella_sp._AM09-45_GCF_003433745.1	Firmicutes	Erysipelotrichia	Erysipelotrichales	Erysipelotrichaceae	Absiella	r15c1	cyclic-lactone-autoinducer	NZ_QVFJ01000022.region001.gbk	18177	38737	20561	16	18176	38737	Absiella_sp._AM09-45_GCF_003433745.1__r15c1__ctg15_27				N
Absiella_sp._AM09-45_GCF_003433745.1	Firmicutes	Erysipelotrichia	Erysipelotrichales	Erysipelotrichaceae	Absiella	r20c1	cyclic-lactone-autoinducer	NZ_QVFJ01000027.region001.gbk	23805	44450	20646	20	23804	44450	Absiella_sp._AM09-45_GCF_003433745.1__r20c1__ctg20_32	Absiella_sp._AM09-45_GCF_003433745.1__r20c1__ctg20_33		GCF_003433745.1/NZ_QVFJ01000027.region001_11 # 10527 # 10646 # -1 # ID=13600_11;partial=00;start_type=ATG;rbs_motif=AGGAG;rbs_spacer=5-10bp;gc_cont=0.317	Y
Absiella_sp._AM09-45_GCF_003433745.1	Firmicutes	Erysipelotrichia	Erysipelotrichales	Erysipelotrichaceae	Absiella	r3c1	cyclic-lactone-autoinducer	NZ_QVFJ01000011.region001.gbk	3983	24705	20723	12	3982	24705	Absiella_sp._AM09-45_GCF_003433745.1__r3c1__ctg3_9	Absiella_sp._AM09-45_GCF_003433745.1__r3c1__ctg3_10		GCF_003433745.1/NZ_QVFJ01000011.region001_6 # 10592 # 10723 # 1 # ID=13601_6;partial=00;start_type=ATG;rbs_motif=AGGAG;rbs_spacer=5-10bp;gc_cont=0.333	Y
Absiella_sp._AM09-45_GCF_003433745.1	Firmicutes	Erysipelotrichia	Erysipelotrichales	Erysipelotrichaceae	Absiella	r5c1	cyclic-lactone-autoinducer	NZ_QVFJ01000013.region001.gbk	55617	76222	20606	21	55616	76222	Absiella_sp._AM09-45_GCF_003433745.1__r5c1__ctg5_73				N
Absiella_sp._AM09-45_GCF_003433745.1	Firmicutes	Erysipelotrichia	Erysipelotrichales	Erysipelotrichaceae	Absiella	r6c1	cyclic-lactone-autoinducer	NZ_QVFJ01000014.region001.gbk	53096	73692	20597	15	53095	73692	Absiella_sp._AM09-45_GCF_003433745.1__r6c1__ctg6_61				N
Absiella_sp._AM09-50_GCF_003433845.1	Firmicutes	Erysipelotrichia	Erysipelotrichales	Erysipelotrichaceae	Absiella	r14c1	cyclic-lactone-autoinducer	NZ_QVFI01000021.region001.gbk	31196	51756	20561	17	31195	51756	Absiella_sp._AM09-50_GCF_003433845.1__r14c1__ctg14_38				N
Absiella_sp._AM09-50_GCF_003433845.1	Firmicutes	Erysipelotrichia	Erysipelotrichales	Erysipelotrichaceae	Absiella	r19c1	cyclic-lactone-autoinducer	NZ_QVFI01000026.region001.gbk	23811	44456	20646	20	23810	44456	Absiella_sp._AM09-50_GCF_003433845.1__r19c1__ctg19_32	Absiella_sp._AM09-50_GCF_003433845.1__r19c1__ctg19_33		GCF_003433845.1/NZ_QVFI01000026.region001_11 # 10527 # 10646 # -1 # ID=13604_11;partial=00;start_type=ATG;rbs_motif=AGGAG;rbs_spacer=5-10bp;gc_cont=0.317	Y
Absiella_sp._AM09-50_GCF_003433845.1	Firmicutes	Erysipelotrichia	Erysipelotrichales	Erysipelotrichaceae	Absiella	r3c1	cyclic-lactone-autoinducer	NZ_QVFI01000011.region001.gbk	3989	24711	20723	12	3988	24711	Absiella_sp._AM09-50_GCF_003433845.1__r3c1__ctg3_9	Absiella_sp._AM09-50_GCF_003433845.1__r3c1__ctg3_10		GCF_003433845.1/NZ_QVFI01000011.region001_6 # 10592 # 10723 # 1 # ID=13605_6;partial=00;start_type=ATG;rbs_motif=AGGAG;rbs_spacer=5-10bp;gc_cont=0.333	Y
Absiella_sp._AM09-50_GCF_003433845.1	Firmicutes	Erysipelotrichia	Erysipelotrichales	Erysipelotrichaceae	Absiella	r5c1	cyclic-lactone-autoinducer	NZ_QVFI01000013.region001.gbk	55623	76228	20606	21	55622	76228	Absiella_sp._AM09-50_GCF_003433845.1__r5c1__ctg5_73				N
Absiella_sp._AM09-50_GCF_003433845.1	Firmicutes	Erysipelotrichia	Erysipelotrichales	Erysipelotrichaceae	Absiella	r6c1	cyclic-lactone-autoinducer	NZ_QVFI01000014.region001.gbk	53028	73624	20597	15	53027	73624	Absiella_sp._AM09-50_GCF_003433845.1__r6c1__ctg6_61				N
Absiella_sp._AM10-20_GCF_003433755.1	Firmicutes	Erysipelotrichia	Erysipelotrichales	Erysipelotrichaceae	Absiella	r11c1	cyclic-lactone-autoinducer	NZ_QVFH01000019.region001.gbk	6113	26673	20561	17	6112	26673	Absiella_sp._AM10-20_GCF_003433755.1__r11c1__ctg11_18				N
Absiella_sp._AM10-20_GCF_003433755.1	Firmicutes	Erysipelotrichia	Erysipelotrichales	Erysipelotrichaceae	Absiella	r56c1	cyclic-lactone-autoinducer	NZ_QVFH01000006.region001.gbk	22983	43628	20646	19	22982	43628	Absiella_sp._AM10-20_GCF_003433755.1__r56c1__ctg56_31	Absiella_sp._AM10-20_GCF_003433755.1__r56c1__ctg56_32		GCF_003433755.1/NZ_QVFH01000006.region001_11 # 10527 # 10646 # -1 # ID=13608_11;partial=00;start_type=ATG;rbs_motif=AGGAG;rbs_spacer=5-10bp;gc_cont=0.317	Y
Absiella_sp._AM10-20_GCF_003433755.1	Firmicutes	Erysipelotrichia	Erysipelotrichales	Erysipelotrichaceae	Absiella	r67c1	cyclic-lactone-autoinducer	NZ_QVFH01000007.region001.gbk	177783	191095	13313	12	177782	191095	Absiella_sp._AM10-20_GCF_003433755.1__r67c1__ctg67_172				N
Absiella_sp._AM10-20_GCF_003433755.1	Firmicutes	Erysipelotrichia	Erysipelotrichales	Erysipelotrichaceae	Absiella	r6c1	NRPS,cyclic-lactone-autoinducer	NZ_QVFH01000014.region001.gbk	18904	74107	55204	37	47249	67977	Absiella_sp._AM10-20_GCF_003433755.1__r6c1__ctg6_51	Absiella_sp._AM10-20_GCF_003433755.1__r6c1__ctg6_52		GCF_003433755.1/NZ_QVFH01000014.region001_30 # 38916 # 39074 # -1 # ID=13610_30;partial=00;start_type=ATG;rbs_motif=GGAGG;rbs_spacer=5-10bp;gc_cont=0.415	Y
Absiella_sp._AM10-20_GCF_003433755.1	Firmicutes	Erysipelotrichia	Erysipelotrichales	Erysipelotrichaceae	Absiella	r78c1	cyclic-lactone-autoinducer	NZ_QVFH01000008.region001.gbk	52430	73035	20606	21	52429	73035	Absiella_sp._AM10-20_GCF_003433755.1__r78c1__ctg78_59				N
Absiella_sp._AM10-20_GCF_003433755.1	Firmicutes	Erysipelotrichia	Erysipelotrichales	Erysipelotrichaceae	Absiella	r88c1	cyclic-lactone-autoinducer	NZ_QVFH01000009.region001.gbk	100822	121544	20723	12	100821	121544	Absiella_sp._AM10-20_GCF_003433755.1__r88c1__ctg88_94	Absiella_sp._AM10-20_GCF_003433755.1__r88c1__ctg88_93		GCF_003433755.1/NZ_QVFH01000009.region001_9 # 10001 # 10132 # -1 # ID=13612_9;partial=00;start_type=ATG;rbs_motif=AGGAG;rbs_spacer=5-10bp;gc_cont=0.333	Y
Absiella_sp._AM22-9_GCF_003433695.1	Firmicutes	Erysipelotrichia	Erysipelotrichales	Erysipelotrichaceae	Absiella	r12c1	cyclic-lactone-autoinducer	NZ_QVFG01000002.region001.gbk	100820	121518	20699	13	100819	121518	Absiella_sp._AM22-9_GCF_003433695.1__r12c1__ctg12_95	Absiella_sp._AM22-9_GCF_003433695.1__r12c1__ctg12_94		GCF_003433695.1/NZ_QVFG01000002.region001_9 # 10001 # 10132 # -1 # ID=14421_9;partial=00;start_type=ATG;rbs_motif=AGGAG;rbs_spacer=5-10bp;gc_cont=0.333	Y
Absiella_sp._AM22-9_GCF_003433695.1	Firmicutes	Erysipelotrichia	Erysipelotrichales	Erysipelotrichaceae	Absiella	r1c1	cyclic-lactone-autoinducer	NZ_QVFG01000001.region001.gbk	52647	73252	20606	21	52646	73252	Absiella_sp._AM22-9_GCF_003433695.1__r1c1__ctg1_60				N
Absiella_sp._AM22-9_GCF_003433695.1	Firmicutes	Erysipelotrichia	Erysipelotrichales	Erysipelotrichaceae	Absiella	r23c1	cyclic-lactone-autoinducer	NZ_QVFG01000003.region001.gbk	84581	103695	19115	18	84580	103695	Absiella_sp._AM22-9_GCF_003433695.1__r23c1__ctg23_103				N
Absiella_sp._AM22-9_GCF_003433695.1	Firmicutes	Erysipelotrichia	Erysipelotrichales	Erysipelotrichaceae	Absiella	r23c2	cyclic-lactone-autoinducer	NZ_QVFG01000003.region002.gbk	325744	346389	20646	20	325743	346389	Absiella_sp._AM22-9_GCF_003433695.1__r23c2__ctg23_344	Absiella_sp._AM22-9_GCF_003433695.1__r23c2__ctg23_343		GCF_003433695.1/NZ_QVFG01000003.region002_8 # 10001 # 10120 # 1 # ID=14423_8;partial=00;start_type=ATG;rbs_motif=AGGAG;rbs_spacer=5-10bp;gc_cont=0.317	Y
Absiella_sp._AM22-9_GCF_003433695.1	Firmicutes	Erysipelotrichia	Erysipelotrichales	Erysipelotrichaceae	Absiella	r56c1	cyclic-lactone-autoinducer	NZ_QVFG01000006.region001.gbk	51345	71941	20597	15	51344	71941	Absiella_sp._AM22-9_GCF_003433695.1__r56c1__ctg56_60				N
Absiella_sp._AM27-20_GCF_003480975.1	Firmicutes	Erysipelotrichia	Erysipelotrichales	Erysipelotrichaceae	Absiella	r1c1	cyclic-lactone-autoinducer	NZ_QUJU01000001.region001.gbk	180288	200884	20597	15	180287	200884	Absiella_sp._AM27-20_GCF_003480975.1__r1c1__ctg1_182				N
Absiella_sp._AM27-20_GCF_003480975.1	Firmicutes	Erysipelotrichia	Erysipelotrichales	Erysipelotrichaceae	Absiella	r26c1	cyclic-lactone-autoinducer	NZ_QUJU01000014.region001.gbk	76947	97501	20555	18	76946	97501	Absiella_sp._AM27-20_GCF_003480975.1__r26c1__ctg26_94				N
Absiella_sp._AM27-20_GCF_003480975.1	Firmicutes	Erysipelotrichia	Erysipelotrichales	Erysipelotrichaceae	Absiella	r37c1	cyclic-lactone-autoinducer	NZ_QUJU01000024.region001.gbk	3995	24717	20723	13	3994	24717	Absiella_sp._AM27-20_GCF_003480975.1__r37c1__ctg37_9	Absiella_sp._AM27-20_GCF_003480975.1__r37c1__ctg37_10		GCF_003480975.1/NZ_QUJU01000024.region001_6 # 10592 # 10723 # 1 # ID=14462_6;partial=00;start_type=ATG;rbs_motif=AGGAG;rbs_spacer=5-10bp;gc_cont=0.333	Y
Absiella_sp._AM27-20_GCF_003480975.1	Firmicutes	Erysipelotrichia	Erysipelotrichales	Erysipelotrichaceae	Absiella	r45c1	cyclic-lactone-autoinducer	NZ_QUJU01000031.region001.gbk	14242	34887	20646	20	14241	34887	Absiella_sp._AM27-20_GCF_003480975.1__r45c1__ctg45_24	Absiella_sp._AM27-20_GCF_003480975.1__r45c1__ctg45_23		GCF_003480975.1/NZ_QUJU01000031.region001_8 # 10001 # 10120 # 1 # ID=14463_8;partial=00;start_type=ATG;rbs_motif=AGGAG;rbs_spacer=5-10bp;gc_cont=0.317	Y
Absiella_sp._AM27-20_GCF_003480975.1	Firmicutes	Erysipelotrichia	Erysipelotrichales	Erysipelotrichaceae	Absiella	r87c1	cyclic-lactone-autoinducer	NZ_QUJU01000007.region001.gbk	36124	56729	20606	22	36123	56729	Absiella_sp._AM27-20_GCF_003480975.1__r87c1__ctg87_41				N
Absiella_sp._AM29-15_GCF_003434225.1	Firmicutes	Erysipelotrichia	Erysipelotrichales	Erysipelotrichaceae	Absiella	r19c1	cyclic-lactone-autoinducer	NZ_QVFL01000026.region001.gbk	16164	36809	20646	19	16163	36809	Absiella_sp._AM29-15_GCF_003434225.1__r19c1__ctg19_27	Absiella_sp._AM29-15_GCF_003434225.1__r19c1__ctg19_26		GCF_003434225.1/NZ_QVFL01000026.region001_9 # 10001 # 10120 # 1 # ID=14464_9;partial=00;start_type=ATG;rbs_motif=AGGAG;rbs_spacer=5-10bp;gc_cont=0.325	Y
Absiella_sp._AM29-15_GCF_003434225.1	Firmicutes	Erysipelotrichia	Erysipelotrichales	Erysipelotrichaceae	Absiella	r53c1	cyclic-lactone-autoinducer	NZ_QVFL01000009.region001.gbk	122782	143504	20723	13	122781	143504	Absiella_sp._AM29-15_GCF_003434225.1__r53c1__ctg53_124	Absiella_sp._AM29-15_GCF_003434225.1__r53c1__ctg53_123		GCF_003434225.1/NZ_QVFL01000009.region001_9 # 10001 # 10132 # -1 # ID=14465_9;partial=00;start_type=ATG;rbs_motif=AGGAG;rbs_spacer=5-10bp;gc_cont=0.333	Y
Absiella_sp._AM29-15_GCF_003434225.1	Firmicutes	Erysipelotrichia	Erysipelotrichales	Erysipelotrichaceae	Absiella	r9c1	cyclic-lactone-autoinducer	NZ_QVFL01000017.region001.gbk	34492	55097	20606	17	34491	55097	Absiella_sp._AM29-15_GCF_003434225.1__r9c1__ctg9_42				N
Absiella_sp._AM54-8XD_GCF_003434045.1	Firmicutes	Erysipelotrichia	Erysipelotrichales	Erysipelotrichaceae	Absiella	r156c1	cyclic-lactone-autoinducer	NZ_QVFK01000050.region001.gbk	1	12246	12246	14	0	12246	Absiella_sp._AM54-8XD_GCF_003434045.1__r156c1__ctg156_3	Absiella_sp._AM54-8XD_GCF_003434045.1__r156c1__ctg156_4		GCF_003434045.1/NZ_QVFK01000050.region001_5 # 2115 # 2246 # 1 # ID=14471_5;partial=00;start_type=ATG;rbs_motif=AGGAG;rbs_spacer=5-10bp;gc_cont=0.333	Y
Absiella_sp._AM54-8XD_GCF_003434045.1	Firmicutes	Erysipelotrichia	Erysipelotrichales	Erysipelotrichaceae	Absiella	r164c1	cyclic-lactone-autoinducer	NZ_QVFK01000058.region001.gbk	1	10853	10853	13	0	10853	Absiella_sp._AM54-8XD_GCF_003434045.1__r164c1__ctg164_3	Absiella_sp._AM54-8XD_GCF_003434045.1__r164c1__ctg164_2		GCF_003434045.1/NZ_QVFK01000058.region001_1 # 208 # 327 # 1 # ID=14472_1;partial=00;start_type=ATG;rbs_motif=AGGAG;rbs_spacer=5-10bp;gc_cont=0.325	Y
Absiella_sp._AM54-8XD_GCF_003434045.1	Firmicutes	Erysipelotrichia	Erysipelotrichales	Erysipelotrichaceae	Absiella	r35c1	cyclic-lactone-autoinducer	NZ_QVFK01000013.region001.gbk	24688	45284	20597	16	24687	45284	Absiella_sp._AM54-8XD_GCF_003434045.1__r35c1__ctg35_34				N
Absiella_sp._AM54-8XD_GCF_003434045.1	Firmicutes	Erysipelotrichia	Erysipelotrichales	Erysipelotrichaceae	Absiella	r85c1	cyclic-lactone-autoinducer	NZ_QVFK01000175.region001.gbk	1	1777	1777	4	0	1777	Absiella_sp._AM54-8XD_GCF_003434045.1__r85c1__ctg85_2				N
Abyssisolibacter_fermentans_MCWD3_GCF_001559865.1	Firmicutes	Clostridia	Eubacteriales	Clostridiaceae	Abyssisolibacter	r47c1	cyclic-lactone-autoinducer	NZ_LOHE01000054.region001.gbk	34048	48846	14799	14	34047	48846	Abyssisolibacter_fermentans_MCWD3_GCF_001559865.1__r47c1__ctg47_47	Abyssisolibacter_fermentans_MCWD3_GCF_001559865.1__r47c1__ctg47_45			Y
Acetanaerobacterium_sp._MSJ-12_GCF_018917875.1	Firmicutes	Clostridia	Eubacteriales	Oscillospiraceae	Acetanaerobacterium	r15c1	cyclic-lactone-autoinducer	c00015_NZ_JAHL...region001.gbk	203231	224006	20776	19	203230	224006	Acetanaerobacterium_sp._MSJ-12_GCF_018917875.1__r15c1__ctg15_217	Acetanaerobacterium_sp._MSJ-12_GCF_018917875.1__r15c1__ctg15_216			Y
Acetivibrio_cellulolyticus_CD2_GCF_000179595.2	Firmicutes	Clostridia	Eubacteriales	Oscillospiraceae	Acetivibrio	r3c1	cyclic-lactone-autoinducer	NZ_JH556653.1.region001.gbk	1430182	1448328	18147	16	1430181	1448328		Acetivibrio_cellulolyticus_CD2_GCF_000179595.2__r3c1__ctg3_1189			Y
Acetivibrio_cellulolyticus_CD2_GCF_000179595.2	Firmicutes	Clostridia	Eubacteriales	Oscillospiraceae	Acetivibrio	r3c2	cyclic-lactone-autoinducer	NZ_JH556653.1.region002.gbk	1477844	1495686	17843	12	1477843	1495686	Acetivibrio_cellulolyticus_CD2_GCF_000179595.2__r3c2__ctg3_1225				N
Acetivibrio_cellulolyticus_CD2_GCF_000179595.2	Firmicutes	Clostridia	Eubacteriales	Oscillospiraceae	Acetivibrio	r3c3	NRPS,NRPS-like,T1PKS,cyclic-lactone-autoinducer	NZ_JH556653.1.region003.gbk	1993444	2050228	56785	36	2027079	2047202		Acetivibrio_cellulolyticus_CD2_GCF_000179595.2__r3c3__ctg3_1668			Y
Acetivibrio_cellulolyticus_CD2_GCF_000179595.2	Firmicutes	Clostridia	Eubacteriales	Oscillospiraceae	Acetivibrio	r7c1	cyclic-lactone-autoinducer	NZ_JH556657.1.region001.gbk	479068	499658	20591	11	479067	499658	Acetivibrio_cellulolyticus_CD2_GCF_000179595.2__r7c1__ctg7_398				N
Acetivibrio_clariflavus_4-2a_GCF_000519985.1	Firmicutes	Clostridia	Eubacteriales	Oscillospiraceae	Acetivibrio	r1c5	cyclic-lactone-autoinducer	NZ_KI913112.1.region005.gbk	1989181	2009721	20541	22	1989180	2009721	Acetivibrio_clariflavus_4-2a_GCF_000519985.1__r1c5__ctg1_1696	Acetivibrio_clariflavus_4-2a_GCF_000519985.1__r1c5__ctg1_1695		GCF_000519985.1/NZ_KI913112.1.region005_12 # 9945 # 10079 # -1 # ID=14719_12;partial=00;start_type=ATG;rbs_motif=AGxAGG/AGGxGG;rbs_spacer=5-10bp;gc_cont=0.378	Y
Acetivibrio_clariflavus_4-2a_GCF_000519985.1	Firmicutes	Clostridia	Eubacteriales	Oscillospiraceae	Acetivibrio	r1c6	cyclic-lactone-autoinducer	NZ_KI913112.1.region006.gbk	2562036	2581534	19499	22	2562035	2581534		Acetivibrio_clariflavus_4-2a_GCF_000519985.1__r1c6__ctg1_2245			Y
Acetivibrio_clariflavus_4-2a_GCF_000519985.1	Firmicutes	Clostridia	Eubacteriales	Oscillospiraceae	Acetivibrio	r1c7	cyclic-lactone-autoinducer	NZ_KI913112.1.region007.gbk	2716293	2735074	18782	13	2716292	2735074	Acetivibrio_clariflavus_4-2a_GCF_000519985.1__r1c7__ctg1_2380				N
Acetivibrio_clariflavus_4-2a_GCF_000519985.1	Firmicutes	Clostridia	Eubacteriales	Oscillospiraceae	Acetivibrio	r1c8	cyclic-lactone-autoinducer	NZ_KI913112.1.region008.gbk	2765139	2784093	18955	18	2765138	2784093		Acetivibrio_clariflavus_4-2a_GCF_000519985.1__r1c8__ctg1_2412			Y
Acetivibrio_clariflavus_4-2a_GCF_000519985.1	Firmicutes	Clostridia	Eubacteriales	Oscillospiraceae	Acetivibrio	r1c9	cyclic-lactone-autoinducer	NZ_KI913112.1.region009.gbk	3458973	3479751	20779	20	3458972	3479751	Acetivibrio_clariflavus_4-2a_GCF_000519985.1__r1c9__ctg1_2997	Acetivibrio_clariflavus_4-2a_GCF_000519985.1__r1c9__ctg1_2998		GCF_000519985.1/NZ_KI913112.1.region009_8 # 10621 # 10779 # 1 # ID=14720_8;partial=00;start_type=ATG;rbs_motif=GGA/GAG/AGG;rbs_spacer=5-10bp;gc_cont=0.390	Y
Acetivibrio_clariflavus_4-2A_GCF_007827345.1	Firmicutes	Clostridia	Eubacteriales	Oscillospiraceae	Acetivibrio	r1c1	cyclic-lactone-autoinducer	NZ_VISJ01000001.region001.gbk	78870	97824	18955	18	78869	97824		Acetivibrio_clariflavus_4-2A_GCF_007827345.1__r1c1__ctg1_80			Y
Acetivibrio_clariflavus_4-2A_GCF_007827345.1	Firmicutes	Clostridia	Eubacteriales	Oscillospiraceae	Acetivibrio	r1c12	cyclic-lactone-autoinducer	NZ_VISJ01000001.region012.gbk	4271067	4291845	20779	21	4271066	4291845	Acetivibrio_clariflavus_4-2A_GCF_007827345.1__r1c12__ctg1_3681	Acetivibrio_clariflavus_4-2A_GCF_007827345.1__r1c12__ctg1_3680		GCF_007827345.1/NZ_VISJ01000001.region012_15 # 10001 # 10159 # -1 # ID=18944_15;partial=00;start_type=ATG;rbs_motif=GGA/GAG/AGG;rbs_spacer=5-10bp;gc_cont=0.390	Y
Acetivibrio_clariflavus_4-2A_GCF_007827345.1	Firmicutes	Clostridia	Eubacteriales	Oscillospiraceae	Acetivibrio	r1c2	cyclic-lactone-autoinducer	NZ_VISJ01000001.region002.gbk	127889	141380	13492	6	127888	141380	Acetivibrio_clariflavus_4-2A_GCF_007827345.1__r1c2__ctg1_112				N
Acetivibrio_clariflavus_4-2A_GCF_007827345.1	Firmicutes	Clostridia	Eubacteriales	Oscillospiraceae	Acetivibrio	r1c3	cyclic-lactone-autoinducer	NZ_VISJ01000001.region003.gbk	280972	300470	19499	22	280971	300470		Acetivibrio_clariflavus_4-2A_GCF_007827345.1__r1c3__ctg1_236			Y
Acetivibrio_clariflavus_4-2A_GCF_007827345.1	Firmicutes	Clostridia	Eubacteriales	Oscillospiraceae	Acetivibrio	r1c4	cyclic-lactone-autoinducer	NZ_VISJ01000001.region004.gbk	858786	879326	20541	22	858785	879326	Acetivibrio_clariflavus_4-2A_GCF_007827345.1__r1c4__ctg1_783	Acetivibrio_clariflavus_4-2A_GCF_007827345.1__r1c4__ctg1_784		GCF_007827345.1/NZ_VISJ01000001.region004_12 # 10463 # 10597 # 1 # ID=18945_12;partial=00;start_type=ATG;rbs_motif=AGxAGG/AGGxGG;rbs_spacer=5-10bp;gc_cont=0.378	Y
Acetivibrio_clariflavus_DSM_19732_GCF_000237085.1	Firmicutes	Clostridia	Eubacteriales	Oscillospiraceae	Acetivibrio	r1c1	cyclic-lactone-autoinducer	NC_016627.1.region001.gbk	21902	40856	18955	18	21901	40856		Acetivibrio_clariflavus_DSM_19732_GCF_000237085.1__r1c1__ctg1_22			Y
Acetivibrio_clariflavus_DSM_19732_GCF_000237085.1	Firmicutes	Clostridia	Eubacteriales	Oscillospiraceae	Acetivibrio	r1c10	cyclic-lactone-autoinducer	NC_016627.1.region010.gbk	4735732	4753914	18183	22	4735731	4753914		Acetivibrio_clariflavus_DSM_19732_GCF_000237085.1__r1c10__ctg1_4098			Y
Acetivibrio_clariflavus_DSM_19732_GCF_000237085.1	Firmicutes	Clostridia	Eubacteriales	Oscillospiraceae	Acetivibrio	r1c11	cyclic-lactone-autoinducer	NC_016627.1.region011.gbk	4869612	4890256	20645	8	4869611	4890256	Acetivibrio_clariflavus_DSM_19732_GCF_000237085.1__r1c11__ctg1_4206				N
Acetivibrio_clariflavus_DSM_19732_GCF_000237085.1	Firmicutes	Clostridia	Eubacteriales	Oscillospiraceae	Acetivibrio	r1c2	cyclic-lactone-autoinducer	NC_016627.1.region002.gbk	876102	895712	19611	17	876101	895712	Acetivibrio_clariflavus_DSM_19732_GCF_000237085.1__r1c2__ctg1_752	Acetivibrio_clariflavus_DSM_19732_GCF_000237085.1__r1c2__ctg1_753		GCF_000237085.1/NC_016627.1.region002_7 # 10153 # 10311 # 1 # ID=19425_7;partial=00;start_type=ATG;rbs_motif=GGA/GAG/AGG;rbs_spacer=5-10bp;gc_cont=0.390	Y
Acetivibrio_clariflavus_DSM_19732_GCF_000237085.1	Firmicutes	Clostridia	Eubacteriales	Oscillospiraceae	Acetivibrio	r1c9	cyclic-lactone-autoinducer	NC_016627.1.region009.gbk	4172041	4192579	20539	22	4172040	4192579	Acetivibrio_clariflavus_DSM_19732_GCF_000237085.1__r1c9__ctg1_3550	Acetivibrio_clariflavus_DSM_19732_GCF_000237085.1__r1c9__ctg1_3549		GCF_000237085.1/NC_016627.1.region009_12 # 9944 # 10078 # -1 # ID=19426_12;partial=00;start_type=ATG;rbs_motif=GGAGG;rbs_spacer=5-10bp;gc_cont=0.378	Y
Acetivibrio_ethanolgignens_ACET-33324_GCF_001461035.1	Firmicutes	Clostridia	Eubacteriales	Oscillospiraceae	Acetivibrio	r131c1	cyclic-lactone-autoinducer	NZ_LNAM01000165.region001.gbk	1	14336	14336	14	0	14336	Acetivibrio_ethanolgignens_ACET-33324_GCF_001461035.1__r131c1__ctg131_5	Acetivibrio_ethanolgignens_ACET-33324_GCF_001461035.1__r131c1__ctg131_6			Y
Acetivibrio_ethanolgignens_ACET-33324_GCF_001461035.1	Firmicutes	Clostridia	Eubacteriales	Oscillospiraceae	Acetivibrio	r49c1	cyclic-lactone-autoinducer	NZ_LNAM01000049.region001.gbk	1	2910	2910	4	0	2910	Acetivibrio_ethanolgignens_ACET-33324_GCF_001461035.1__r49c1__ctg49_4				N
Acetivibrio_ethanolgignens_MGYG-HGUT-02464_GCF_902387445.1	Firmicutes	Clostridia	Eubacteriales	Oscillospiraceae	Acetivibrio	r131c1	cyclic-lactone-autoinducer	c00131_NZ_CABM...region001.gbk	1	14336	14336	14	0	14336	Acetivibrio_ethanolgignens_MGYG-HGUT-02464_GCF_902387445.1__r131c1__ctg131_5	Acetivibrio_ethanolgignens_MGYG-HGUT-02464_GCF_902387445.1__r131c1__ctg131_6			Y
Acetivibrio_ethanolgignens_MGYG-HGUT-02464_GCF_902387445.1	Firmicutes	Clostridia	Eubacteriales	Oscillospiraceae	Acetivibrio	r49c1	cyclic-lactone-autoinducer	c00049_NZ_CABM...region001.gbk	1	2910	2910	4	0	2910	Acetivibrio_ethanolgignens_MGYG-HGUT-02464_GCF_902387445.1__r49c1__ctg49_4				N
Acetivibrio_mesophilus_N2K1_GCF_004102745.1	Firmicutes	Clostridia	Eubacteriales	Oscillospiraceae	Acetivibrio	r1c1	cyclic-lactone-autoinducer	NZ_RLII01000001.region001.gbk	165955	186724	20770	22	165954	186724	Acetivibrio_mesophilus_N2K1_GCF_004102745.1__r1c1__ctg1_179	Acetivibrio_mesophilus_N2K1_GCF_004102745.1__r1c1__ctg1_180		GCF_004102745.1/NZ_RLII01000001.region001_13 # 10636 # 10770 # 1 # ID=20857_13;partial=00;start_type=ATG;rbs_motif=GGAGG;rbs_spacer=5-10bp;gc_cont=0.385	Y
Acetivibrio_mesophilus_N2K1_GCF_004102745.1	Firmicutes	Clostridia	Eubacteriales	Oscillospiraceae	Acetivibrio	r20c1	cyclic-lactone-autoinducer	NZ_RLII01000027.region001.gbk	1	10926	10926	11	0	10926	Acetivibrio_mesophilus_N2K1_GCF_004102745.1__r20c1__ctg20_2				N
Acetivibrio_mesophilus_N2K1_GCF_004102745.1	Firmicutes	Clostridia	Eubacteriales	Oscillospiraceae	Acetivibrio	r25c1	cyclic-lactone-autoinducer	NZ_RLII01000031.region001.gbk	15801	36613	20813	15	15800	36613	Acetivibrio_mesophilus_N2K1_GCF_004102745.1__r25c1__ctg25_25	Acetivibrio_mesophilus_N2K1_GCF_004102745.1__r25c1__ctg25_24		GCF_004102745.1/NZ_RLII01000031.region001_12 # 10001 # 10165 # -1 # ID=20858_12;partial=00;start_type=ATG;rbs_motif=GGxGG;rbs_spacer=5-10bp;gc_cont=0.400	Y
Acetivibrio_mesophilus_N2K1_GCF_004102745.1	Firmicutes	Clostridia	Eubacteriales	Oscillospiraceae	Acetivibrio	r67c1	cyclic-lactone-autoinducer	NZ_RLII01000007.region001.gbk	29589	49711	20123	18	29588	49711		Acetivibrio_mesophilus_N2K1_GCF_004102745.1__r67c1__ctg67_32			Y
Acetivibrio_saccincola_A7_GCF_002969215.1	Firmicutes	Clostridia	Eubacteriales	Oscillospiraceae	Acetivibrio	r1c1	cyclic-lactone-autoinducer	NZ_NEMB01000003.region001.gbk	549328	569131	19804	24	549327	569131		Acetivibrio_saccincola_A7_GCF_002969215.1__r1c1__ctg1_502			Y
Acetivibrio_saccincola_A7_GCF_002969215.1	Firmicutes	Clostridia	Eubacteriales	Oscillospiraceae	Acetivibrio	r1c2	cyclic-lactone-autoinducer	NZ_NEMB01000003.region002.gbk	603302	623946	20645	19	603301	623946	Acetivibrio_saccincola_A7_GCF_002969215.1__r1c2__ctg1_550				N
Acetivibrio_saccincola_GGR1_GCF_002844395.1	Firmicutes	Clostridia	Eubacteriales	Oscillospiraceae	Acetivibrio	r1c1	cyclic-lactone-autoinducer	NZ_CP025197.1.region001.gbk	11779	31058	19280	23	11778	31058		Acetivibrio_saccincola_GGR1_GCF_002844395.1__r1c1__ctg1_24			Y
Acetivibrio_saccincola_GGR1_GCF_002844395.1	Firmicutes	Clostridia	Eubacteriales	Oscillospiraceae	Acetivibrio	r1c5	cyclic-lactone-autoinducer	NZ_CP025197.1.region005.gbk	3557064	3577708	20645	22	3557063	3577708	Acetivibrio_saccincola_GGR1_GCF_002844395.1__r1c5__ctg1_3200				N
Acetivibrio_sp._MSJd-27_GCF_018918095.1	Firmicutes	Clostridia	Eubacteriales	Oscillospiraceae	Acetivibrio	r2c1	cyclic-lactone-autoinducer	c00002_NZ_JAHL...region001.gbk	21369	42750	21382	22	21368	42750	Acetivibrio_sp._MSJd-27_GCF_018918095.1__r2c1__ctg2_24	Acetivibrio_sp._MSJd-27_GCF_018918095.1__r2c1__ctg2_26		GCF_018918095.1/c00002_NZ_JAHL...region001_13 # 11248 # 11382 # 1 # ID=20859_13;partial=00;start_type=ATG;rbs_motif=AGGAGG;rbs_spacer=5-10bp;gc_cont=0.422	Y
Acetivibrio_thermocellus_AD2_GCF_000255615.2	Firmicutes	Clostridia	Eubacteriales	Oscillospiraceae	Acetivibrio	r1c1	cyclic-lactone-autoinducer	NZ_CP013828.1.region001.gbk	1095721	1115500	19780	19	1095720	1115500	Acetivibrio_thermocellus_AD2_GCF_000255615.2__r1c1__ctg1_958	Acetivibrio_thermocellus_AD2_GCF_000255615.2__r1c1__ctg1_957		GCF_000255615.2/NZ_CP013828.1.region001_12 # 9013 # 9177 # -1 # ID=22009_12;partial=00;start_type=ATG;rbs_motif=AGxAGG/AGGxGG;rbs_spacer=5-10bp;gc_cont=0.388	Y
Acetivibrio_thermocellus_AD2_GCF_000255615.2	Firmicutes	Clostridia	Eubacteriales	Oscillospiraceae	Acetivibrio	r1c7	cyclic-lactone-autoinducer	NZ_CP013828.1.region007.gbk	3295565	3314727	19163	19	3295564	3314727		Acetivibrio_thermocellus_AD2_GCF_000255615.2__r1c7__ctg1_2852			Y
Acetivibrio_thermocellus_AD2_GCF_000255615.2	Firmicutes	Clostridia	Eubacteriales	Oscillospiraceae	Acetivibrio	r1c8	cyclic-lactone-autoinducer	NZ_CP013828.1.region008.gbk	3523384	3544037	20654	14	3523383	3544037	Acetivibrio_thermocellus_AD2_GCF_000255615.2__r1c8__ctg1_3056				N
Acetivibrio_thermocellus_AD2_GCF_002564085.1	Firmicutes	Clostridia	Eubacteriales	Oscillospiraceae	Acetivibrio	r1c1	cyclic-lactone-autoinducer	NZ_PDBW01000001.region001.gbk	1095721	1115500	19780	19	1095720	1115500	Acetivibrio_thermocellus_AD2_GCF_002564085.1__r1c1__ctg1_958	Acetivibrio_thermocellus_AD2_GCF_002564085.1__r1c1__ctg1_957		GCF_002564085.1/NZ_PDBW01000001.region001_12 # 9013 # 9177 # -1 # ID=22025_12;partial=00;start_type=ATG;rbs_motif=AGxAGG/AGGxGG;rbs_spacer=5-10bp;gc_cont=0.388	Y
Acetivibrio_thermocellus_AD2_GCF_002564085.1	Firmicutes	Clostridia	Eubacteriales	Oscillospiraceae	Acetivibrio	r1c7	cyclic-lactone-autoinducer	NZ_PDBW01000001.region007.gbk	3295565	3314727	19163	19	3295564	3314727		Acetivibrio_thermocellus_AD2_GCF_002564085.1__r1c7__ctg1_2852			Y
Acetivibrio_thermocellus_AD2_GCF_002564085.1	Firmicutes	Clostridia	Eubacteriales	Oscillospiraceae	Acetivibrio	r1c8	cyclic-lactone-autoinducer	NZ_PDBW01000001.region008.gbk	3523384	3544037	20654	14	3523383	3544037	Acetivibrio_thermocellus_AD2_GCF_002564085.1__r1c8__ctg1_3056				N
Acetivibrio_thermocellus_ATCC_27405_GCF_000015865.1	Firmicutes	Clostridia	Eubacteriales	Oscillospiraceae	Acetivibrio	r1c4	cyclic-lactone-autoinducer	NC_009012.1.region004.gbk	1583135	1602912	19778	19	1583134	1602912	Acetivibrio_thermocellus_ATCC_27405_GCF_000015865.1__r1c4__ctg1_1365	Acetivibrio_thermocellus_ATCC_27405_GCF_000015865.1__r1c4__ctg1_1366		GCF_000015865.1/NC_009012.1.region004_8 # 10602 # 10766 # 1 # ID=22518_8;partial=00;start_type=ATG;rbs_motif=AGxAGG/AGGxGG;rbs_spacer=5-10bp;gc_cont=0.394	Y
Acetivibrio_thermocellus_ATCC_27405_GCF_000015865.1	Firmicutes	Clostridia	Eubacteriales	Oscillospiraceae	Acetivibrio	r1c8	cyclic-lactone-autoinducer	NC_009012.1.region008.gbk	2561861	2581593	19733	20	2561860	2581593		Acetivibrio_thermocellus_ATCC_27405_GCF_000015865.1__r1c8__ctg1_2259			Y
Acetivibrio_thermocellus_ATCC_27405_GCF_000015865.1	Firmicutes	Clostridia	Eubacteriales	Oscillospiraceae	Acetivibrio	r1c9	cyclic-lactone-autoinducer	NC_009012.1.region009.gbk	2802608	2823261	20654	14	2802607	2823261	Acetivibrio_thermocellus_ATCC_27405_GCF_000015865.1__r1c9__ctg1_2469				N
Acetivibrio_thermocellus_DSM_1313_GCF_000184925.1	Firmicutes	Clostridia	Eubacteriales	Oscillospiraceae	Acetivibrio	r1c1	cyclic-lactone-autoinducer	NC_017304.1.region001.gbk	1093305	1113084	19780	19	1093304	1113084	Acetivibrio_thermocellus_DSM_1313_GCF_000184925.1__r1c1__ctg1_959	Acetivibrio_thermocellus_DSM_1313_GCF_000184925.1__r1c1__ctg1_958		GCF_000184925.1/NC_017304.1.region001_12 # 9013 # 9177 # -1 # ID=22935_12;partial=00;start_type=ATG;rbs_motif=AGxAGG/AGGxGG;rbs_spacer=5-10bp;gc_cont=0.388	Y
Acetivibrio_thermocellus_DSM_1313_GCF_000184925.1	Firmicutes	Clostridia	Eubacteriales	Oscillospiraceae	Acetivibrio	r1c7	cyclic-lactone-autoinducer	NC_017304.1.region007.gbk	3302328	3321491	19164	19	3302327	3321491		Acetivibrio_thermocellus_DSM_1313_GCF_000184925.1__r1c7__ctg1_2851			Y
Acetivibrio_thermocellus_DSM_1313_GCF_000184925.1	Firmicutes	Clostridia	Eubacteriales	Oscillospiraceae	Acetivibrio	r1c8	cyclic-lactone-autoinducer	NC_017304.1.region008.gbk	3530149	3550802	20654	14	3530148	3550802	Acetivibrio_thermocellus_DSM_1313_GCF_000184925.1__r1c8__ctg1_3055				N
Acetivibrio_thermocellus_DSM_1313_GCF_011761575.1	Firmicutes	Clostridia	Eubacteriales	Oscillospiraceae	Acetivibrio	r1c1	cyclic-lactone-autoinducer	c00001_NZ_JAAS...region001.gbk	1050242	1070021	19780	19	1050241	1070021	Acetivibrio_thermocellus_DSM_1313_GCF_011761575.1__r1c1__ctg1_915	Acetivibrio_thermocellus_DSM_1313_GCF_011761575.1__r1c1__ctg1_914		GCF_011761575.1/c00001_NZ_JAAS...region001_12 # 9013 # 9177 # -1 # ID=23398_12;partial=00;start_type=ATG;rbs_motif=AGxAGG/AGGxGG;rbs_spacer=5-10bp;gc_cont=0.388	Y
Acetivibrio_thermocellus_DSM_1313_GCF_011761575.1	Firmicutes	Clostridia	Eubacteriales	Oscillospiraceae	Acetivibrio	r1c7	cyclic-lactone-autoinducer	c00001_NZ_JAAS...region007.gbk	3259024	3278187	19164	19	3259023	3278187		Acetivibrio_thermocellus_DSM_1313_GCF_011761575.1__r1c7__ctg1_2802			Y
Acetivibrio_thermocellus_DSM_1313_GCF_011761575.1	Firmicutes	Clostridia	Eubacteriales	Oscillospiraceae	Acetivibrio	r1c8	cyclic-lactone-autoinducer	c00001_NZ_JAAS...region008.gbk	3486846	3507499	20654	14	3486845	3507499	Acetivibrio_thermocellus_DSM_1313_GCF_011761575.1__r1c8__ctg1_3006				N
Acetivibrio_thermocellus_DSM_2360_GCF_000175715.1	Firmicutes	Clostridia	Eubacteriales	Oscillospiraceae	Acetivibrio	r72c1	cyclic-lactone-autoinducer	NZ_ACVX01000020.region001.gbk	1	10767	10767	10	0	10767	Acetivibrio_thermocellus_DSM_2360_GCF_000175715.1__r72c1__ctg72_1				N
Acetivibrio_thermocellus_DSM_2360_GCF_000175715.1	Firmicutes	Clostridia	Eubacteriales	Oscillospiraceae	Acetivibrio	r81c1	cyclic-lactone-autoinducer	NZ_ACVX01000011.region001.gbk	5866	26465	20600	17	5865	26465	Acetivibrio_thermocellus_DSM_2360_GCF_000175715.1__r81c1__ctg81_12			GCF_000175715.1/NZ_ACVX01000011.region001_8 # 10645 # 10809 # 1 # ID=23855_8;partial=00;start_type=ATG;rbs_motif=AGxAGG/AGGxGG;rbs_spacer=5-10bp;gc_cont=0.394	Y
Acetivibrio_thermocellus_DSM_2360_GCF_000175715.1	Firmicutes	Clostridia	Eubacteriales	Oscillospiraceae	Acetivibrio	r83c1	cyclic-lactone-autoinducer	NZ_ACVX01000009.region001.gbk	60292	80414	20123	18	60291	80414		Acetivibrio_thermocellus_DSM_2360_GCF_000175715.1__r83c1__ctg83_59			Y
Acetivibrio_thermocellus_DSM_2360_LQRI_GCF_001692755.1	Firmicutes	Clostridia	Eubacteriales	Oscillospiraceae	Acetivibrio	r1c1	cyclic-lactone-autoinducer	NZ_CP016502.1.region001.gbk	1096191	1115970	19780	19	1096190	1115970	Acetivibrio_thermocellus_DSM_2360_LQRI_GCF_001692755.1__r1c1__ctg1_958	Acetivibrio_thermocellus_DSM_2360_LQRI_GCF_001692755.1__r1c1__ctg1_957		GCF_001692755.1/NZ_CP016502.1.region001_12 # 9013 # 9177 # -1 # ID=24202_12;partial=00;start_type=ATG;rbs_motif=AGxAGG/AGGxGG;rbs_spacer=5-10bp;gc_cont=0.388	Y
Acetivibrio_thermocellus_DSM_2360_LQRI_GCF_001692755.1	Firmicutes	Clostridia	Eubacteriales	Oscillospiraceae	Acetivibrio	r1c7	cyclic-lactone-autoinducer	NZ_CP016502.1.region007.gbk	3318011	3337174	19164	19	3318010	3337174		Acetivibrio_thermocellus_DSM_2360_LQRI_GCF_001692755.1__r1c7__ctg1_2863			Y
Acetivibrio_thermocellus_DSM_2360_LQRI_GCF_001692755.1	Firmicutes	Clostridia	Eubacteriales	Oscillospiraceae	Acetivibrio	r1c8	cyclic-lactone-autoinducer	NZ_CP016502.1.region008.gbk	3545898	3566551	20654	14	3545897	3566551	Acetivibrio_thermocellus_DSM_2360_LQRI_GCF_001692755.1__r1c8__ctg1_3067				N
Acetivibrio_thermocellus_JW20_GCF_000173015.1	Firmicutes	Clostridia	Eubacteriales	Oscillospiraceae	Acetivibrio	r10c1	cyclic-lactone-autoinducer	NZ_ABVG02000012.region001.gbk	1	12877	12877	13	0	12877		Acetivibrio_thermocellus_JW20_GCF_000173015.1__r10c1__ctg10_3			Y
Acetivibrio_thermocellus_JW20_GCF_000173015.1	Firmicutes	Clostridia	Eubacteriales	Oscillospiraceae	Acetivibrio	r20c1	cyclic-lactone-autoinducer	NZ_ABVG02000002.region001.gbk	293553	311398	17846	20	293552	311398		Acetivibrio_thermocellus_JW20_GCF_000173015.1__r20c1__ctg20_280			Y
Acetivibrio_thermocellus_JW20_GCF_000173015.1	Firmicutes	Clostridia	Eubacteriales	Oscillospiraceae	Acetivibrio	r20c2	cyclic-lactone-autoinducer	NZ_ABVG02000002.region002.gbk	350158	370811	20654	14	350157	370811	Acetivibrio_thermocellus_JW20_GCF_000173015.1__r20c2__ctg20_328				N
Acetivibrio_thermocellus_JW20_GCF_000173015.1	Firmicutes	Clostridia	Eubacteriales	Oscillospiraceae	Acetivibrio	r21c4	cyclic-lactone-autoinducer	NZ_ABVG02000001.region004.gbk	1781713	1802521	20809	19	1781712	1802521	Acetivibrio_thermocellus_JW20_GCF_000173015.1__r21c4__ctg21_1514	Acetivibrio_thermocellus_JW20_GCF_000173015.1__r21c4__ctg21_1515		GCF_000173015.1/NZ_ABVG02000001.region004_8 # 10645 # 10809 # 1 # ID=24923_8;partial=00;start_type=ATG;rbs_motif=AGxAGG/AGGxGG;rbs_spacer=5-10bp;gc_cont=0.394	Y
Acetivibrio_thermocellus_LQRI_GCF_900215405.1	Firmicutes	Clostridia	Eubacteriales	Oscillospiraceae	Acetivibrio	r1c1	cyclic-lactone-autoinducer	NZ_OCMV01000002.region001.gbk	463730	482849	19120	14	463729	482849	Acetivibrio_thermocellus_LQRI_GCF_900215405.1__r1c1__ctg1_426				N
Acetivibrio_thermocellus_LQRI_GCF_900215405.1	Firmicutes	Clostridia	Eubacteriales	Oscillospiraceae	Acetivibrio	r1c2	cyclic-lactone-autoinducer	NZ_OCMV01000002.region002.gbk	692869	712032	19164	19	692868	712032		Acetivibrio_thermocellus_LQRI_GCF_900215405.1__r1c2__ctg1_630			Y
Acetivibrio_thermocellus_LQRI_GCF_900215405.1	Firmicutes	Clostridia	Eubacteriales	Oscillospiraceae	Acetivibrio	r1c8	cyclic-lactone-autoinducer	NZ_OCMV01000002.region008.gbk	2914032	2934840	20809	19	2914031	2934840	Acetivibrio_thermocellus_LQRI_GCF_900215405.1__r1c8__ctg1_2537	Acetivibrio_thermocellus_LQRI_GCF_900215405.1__r1c8__ctg1_2538		GCF_900215405.1/NZ_OCMV01000002.region008_8 # 10645 # 10809 # 1 # ID=25461_8;partial=00;start_type=ATG;rbs_motif=AGxAGG/AGGxGG;rbs_spacer=5-10bp;gc_cont=0.394	Y
Acetivibrio_thermocellus_PAL5_GCF_004803955.1	Firmicutes	Clostridia	Eubacteriales	Oscillospiraceae	Acetivibrio	r13c1	cyclic-lactone-autoinducer	NZ_SBHL01000019.region001.gbk	45577	65699	20123	18	45576	65699		Acetivibrio_thermocellus_PAL5_GCF_004803955.1__r13c1__ctg13_39			Y
Acetivibrio_thermocellus_PAL5_GCF_004803955.1	Firmicutes	Clostridia	Eubacteriales	Oscillospiraceae	Acetivibrio	r79c1	cyclic-lactone-autoinducer	NZ_SBHL01000005.region001.gbk	44238	65046	20809	19	44237	65046	Acetivibrio_thermocellus_PAL5_GCF_004803955.1__r79c1__ctg79_49	Acetivibrio_thermocellus_PAL5_GCF_004803955.1__r79c1__ctg79_48		GCF_004803955.1/NZ_SBHL01000005.region001_13 # 10001 # 10165 # -1 # ID=25960_13;partial=00;start_type=ATG;rbs_motif=AGxAGG/AGGxGG;rbs_spacer=5-10bp;gc_cont=0.388	Y
Acetivibrio_thermocellus_PAL5_GCF_004803955.1	Firmicutes	Clostridia	Eubacteriales	Oscillospiraceae	Acetivibrio	r86c1	cyclic-lactone-autoinducer	NZ_SBHL01000062.region001.gbk	145835	156624	10790	10	145834	156624	Acetivibrio_thermocellus_PAL5_GCF_004803955.1__r86c1__ctg86_147				N
Acetivibrio_thermocellus_YS_GCF_000255575.1	Firmicutes	Clostridia	Eubacteriales	Oscillospiraceae	Acetivibrio	r33c1	cyclic-lactone-autoinducer	NZ_AJGT01000050.region001.gbk	59820	79942	20123	18	59819	79942		Acetivibrio_thermocellus_YS_GCF_000255575.1__r33c1__ctg33_57			Y
Acetivibrio_thermocellus_YS_GCF_000255575.1	Firmicutes	Clostridia	Eubacteriales	Oscillospiraceae	Acetivibrio	r34c1	cyclic-lactone-autoinducer	NZ_AJGT01000049.region001.gbk	1	10765	10765	10	0	10765	Acetivibrio_thermocellus_YS_GCF_000255575.1__r34c1__ctg34_1				N
Acetivibrio_thermocellus_YS_GCF_000255575.1	Firmicutes	Clostridia	Eubacteriales	Oscillospiraceae	Acetivibrio	r79c1	cyclic-lactone-autoinducer	NZ_AJGT01000002.region001.gbk	57048	77856	20809	18	57047	77856	Acetivibrio_thermocellus_YS_GCF_000255575.1__r79c1__ctg79_62	Acetivibrio_thermocellus_YS_GCF_000255575.1__r79c1__ctg79_61		GCF_000255575.1/NZ_AJGT01000002.region001_13 # 10001 # 10165 # -1 # ID=26179_13;partial=00;start_type=ATG;rbs_motif=AGxAGG/AGGxGG;rbs_spacer=5-10bp;gc_cont=0.388	Y
Acetobacterium_bakii_DSM_8239_GCF_001263355.1	Firmicutes	Clostridia	Eubacteriales	Eubacteriaceae	Acetobacterium	r15c1	cyclic-lactone-autoinducer	NZ_LGYO01000022.region001.gbk	7416	28396	20981	24	7415	28396	Acetobacterium_bakii_DSM_8239_GCF_001263355.1__r15c1__ctg15_21	Acetobacterium_bakii_DSM_8239_GCF_001263355.1__r15c1__ctg15_22		GCF_001263355.1/NZ_LGYO01000022.region001_15 # 10856 # 10981 # 1 # ID=27083_15;partial=00;start_type=ATG;rbs_motif=AGGAGG;rbs_spacer=5-10bp;gc_cont=0.349	Y
Acetobacterium_bakii_DSM_8239_GCF_001263355.1	Firmicutes	Clostridia	Eubacteriales	Eubacteriaceae	Acetobacterium	r23c1	cyclic-lactone-autoinducer	NZ_LGYO01000003.region001.gbk	27836	48387	20552	22	27835	48387	Acetobacterium_bakii_DSM_8239_GCF_001263355.1__r23c1__ctg23_33				N
Acetobacterium_bakii_DSM_8239_GCF_008086625.1	Firmicutes	Clostridia	Eubacteriales	Eubacteriaceae	Acetobacterium	r30c1	cyclic-lactone-autoinducer	NZ_RXYC01000003.region001.gbk	403741	424721	20981	24	403740	424721	Acetobacterium_bakii_DSM_8239_GCF_008086625.1__r30c1__ctg30_362	Acetobacterium_bakii_DSM_8239_GCF_008086625.1__r30c1__ctg30_361		GCF_008086625.1/NZ_RXYC01000003.region001_11 # 10001 # 10126 # -1 # ID=27551_11;partial=00;start_type=ATG;rbs_motif=AGGAGG;rbs_spacer=5-10bp;gc_cont=0.349	Y
Acetobacterium_bakii_DSM_8239_GCF_008086625.1	Firmicutes	Clostridia	Eubacteriales	Eubacteriaceae	Acetobacterium	r35c1	cyclic-lactone-autoinducer	NZ_RXYC01000008.region001.gbk	26934	47485	20552	22	26933	47485	Acetobacterium_bakii_DSM_8239_GCF_008086625.1__r35c1__ctg35_31				N
Acetobacterium_bakii_GCF_900235925.1	Firmicutes	Clostridia	Eubacteriales	Eubacteriaceae	Acetobacterium	r2c2	cyclic-lactone-autoinducer	NZ_UHJK01000001.region002.gbk	1084657	1104359	19703	22	1084656	1104359	Acetobacterium_bakii_GCF_900235925.1__r2c2__ctg2_1052				N
Acetobacterium_bakii_GCF_900235925.1	Firmicutes	Clostridia	Eubacteriales	Eubacteriaceae	Acetobacterium	r2c4	cyclic-lactone-autoinducer	NZ_UHJK01000001.region004.gbk	2275086	2296066	20981	24	2275085	2296066	Acetobacterium_bakii_GCF_900235925.1__r2c4__ctg2_2139	Acetobacterium_bakii_GCF_900235925.1__r2c4__ctg2_2140		GCF_900235925.1/NZ_UHJK01000001.region004_15 # 10856 # 10981 # 1 # ID=27828_15;partial=00;start_type=ATG;rbs_motif=AGGAGG;rbs_spacer=5-10bp;gc_cont=0.349	Y
Acetobacterium_bakii_genome_GCF_900562175.1	Firmicutes	Clostridia	Eubacteriales	Eubacteriaceae	Acetobacterium	r2c2	cyclic-lactone-autoinducer	NZ_UOGO01000001.region002.gbk	1084657	1104359	19703	22	1084656	1104359	Acetobacterium_bakii_genome_GCF_900562175.1__r2c2__ctg2_1052				N
Acetobacterium_bakii_genome_GCF_900562175.1	Firmicutes	Clostridia	Eubacteriales	Eubacteriaceae	Acetobacterium	r2c4	cyclic-lactone-autoinducer	NZ_UOGO01000001.region004.gbk	2275086	2296066	20981	24	2275085	2296066	Acetobacterium_bakii_genome_GCF_900562175.1__r2c4__ctg2_2139	Acetobacterium_bakii_genome_GCF_900562175.1__r2c4__ctg2_2140		GCF_900562175.1/NZ_UOGO01000001.region004_15 # 10856 # 10981 # 1 # ID=28336_15;partial=00;start_type=ATG;rbs_motif=AGGAGG;rbs_spacer=5-10bp;gc_cont=0.349	Y
Acetobacterium_dehalogenans_DSM_11527_GCF_000472665.1	Firmicutes	Clostridia	Eubacteriales	Eubacteriaceae	Acetobacterium	r10c1	cyclic-lactone-autoinducer	NZ_KI421449.1.region001.gbk	45022	65573	20552	20	45021	65573	Acetobacterium_dehalogenans_DSM_11527_GCF_000472665.1__r10c1__ctg10_55				N
Acetobacterium_sp._KB-1_GCF_003260995.1	Firmicutes	Clostridia	Eubacteriales	Eubacteriaceae	Acetobacterium	r1c3	cyclic-lactone-autoinducer	NZ_CP030040.1.region003.gbk	3438473	3458715	20243	22	3438472	3458715	Acetobacterium_sp._KB-1_GCF_003260995.1__r1c3__ctg1_3147				N
Acetobacterium_tundrae_DER-2019_GCF_014284395.1	Firmicutes	Clostridia	Eubacteriales	Eubacteriaceae	Acetobacterium	r37c1	RiPP-like,cyclic-lactone-autoinducer	NZ_WJBB01000043.region001.gbk	1	6497	6497	8	0	6497	Acetobacterium_tundrae_DER-2019_GCF_014284395.1__r37c1__ctg37_3				N
Acetobacterium_tundrae_DSM_917_GCF_008086615.1	Firmicutes	Clostridia	Eubacteriales	Eubacteriaceae	Acetobacterium	r15c1	RiPP-like,cyclic-lactone-autoinducer	NZ_RXYB01000023.region001.gbk	16967	37694	20728	19	16966	37694	Acetobacterium_tundrae_DSM_917_GCF_008086615.1__r15c1__ctg15_28	Acetobacterium_tundrae_DSM_917_GCF_008086615.1__r15c1__ctg15_27			Y
Acetobacterium_wieringae_DSM_1911_GCF_001766835.1	Firmicutes	Clostridia	Eubacteriales	Eubacteriaceae	Acetobacterium	r34c1	cyclic-lactone-autoinducer	NZ_LKEU01000042.region001.gbk	1	15273	15273	14	0	15273	Acetobacterium_wieringae_DSM_1911_GCF_001766835.1__r34c1__ctg34_6				N
Acetobacterium_woodii_DSM_1030_GCF_000247605.1	Firmicutes	Clostridia	Eubacteriales	Eubacteriaceae	Acetobacterium	r1c1	cyclic-lactone-autoinducer	NC_016894.1.region001.gbk	652622	673420	20799	17	652621	673420	Acetobacterium_woodii_DSM_1030_GCF_000247605.1__r1c1__ctg1_580	Acetobacterium_woodii_DSM_1030_GCF_000247605.1__r1c1__ctg1_581			Y
Acetohalobium_arabaticum_DSM_5501_GCF_000144695.1	Firmicutes	Clostridia	Halanaerobiales	Halobacteroidaceae	Acetohalobium	r1c1	cyclic-lactone-autoinducer	NC_014378.1.region001.gbk	628529	647516	18988	21	628528	647516	Acetohalobium_arabaticum_DSM_5501_GCF_000144695.1__r1c1__ctg1_590	Acetohalobium_arabaticum_DSM_5501_GCF_000144695.1__r1c1__ctg1_591		GCF_000144695.1/NC_014378.1.region001_10 # 10096 # 10215 # 1 # ID=29524_10;partial=00;start_type=ATG;rbs_motif=AGGAG;rbs_spacer=5-10bp;gc_cont=0.350	Y
Acetohalobium_arabaticum_DSM_5501_GCF_000144695.1	Firmicutes	Clostridia	Halanaerobiales	Halobacteroidaceae	Acetohalobium	r1c2	cyclic-lactone-autoinducer	NC_014378.1.region002.gbk	2023005	2043824	20820	14	2023004	2043824	Acetohalobium_arabaticum_DSM_5501_GCF_000144695.1__r1c2__ctg1_1929	Acetohalobium_arabaticum_DSM_5501_GCF_000144695.1__r1c2__ctg1_1930			Y
Acetonema_longum_DSM_6540_GCF_000219125.1	Firmicutes	Negativicutes	Selenomonadales	Sporomusaceae	Acetonema	r101c1	cyclic-lactone-autoinducer	NZ_AFGF01000126.region001.gbk	69110	89784	20675	18	69109	89784	Acetonema_longum_DSM_6540_GCF_000219125.1__r101c1__ctg101_83			GCF_000219125.1/NZ_AFGF01000126.region001_11 # 10774 # 10914 # 1 # ID=30089_11;partial=00;start_type=ATG;rbs_motif=AGxAGG/AGGxGG;rbs_spacer=5-10bp;gc_cont=0.447	Y
Acutalibacter_muris_B37_37_AM_H_GCF_910574985.1	Firmicutes	Clostridia	Eubacteriales	Oscillospiraceae	Acutalibacter	r12c1	cyclic-lactone-autoinducer	c00012_NZ_CAJT...region001.gbk	48432	69134	20703	19	48431	69134	Acutalibacter_muris_B37_37_AM_H_GCF_910574985.1__r12c1__ctg12_55	Acutalibacter_muris_B37_37_AM_H_GCF_910574985.1__r12c1__ctg12_54		GCF_910574985.1/c00012_NZ_CAJT...region001_11 # 10001 # 10120 # -1 # ID=30623_11;partial=00;start_type=ATG;rbs_motif=AGGAG;rbs_spacer=5-10bp;gc_cont=0.508	Y
Acutalibacter_muris_B37_37_AM_H_GCF_910574985.1	Firmicutes	Clostridia	Eubacteriales	Oscillospiraceae	Acutalibacter	r1c1	cyclic-lactone-autoinducer	c00001_NZ_CAJT...region001.gbk	556774	576929	20156	16	556773	576929		Acutalibacter_muris_B37_37_AM_H_GCF_910574985.1__r1c1__ctg1_542			Y
Acutalibacter_muris_B37_37_AM_H_GCF_910574985.1	Firmicutes	Clostridia	Eubacteriales	Oscillospiraceae	Acutalibacter	r4c1	cyclic-lactone-autoinducer	c00004_NZ_CAJT...region001.gbk	33284	54014	20731	22	33283	54014	Acutalibacter_muris_B37_37_AM_H_GCF_910574985.1__r4c1__ctg4_54	Acutalibacter_muris_B37_37_AM_H_GCF_910574985.1__r4c1__ctg4_53		GCF_910574985.1/c00004_NZ_CAJT...region001_11 # 10001 # 10156 # 1 # ID=30624_11;partial=00;start_type=ATG;rbs_motif=GGAGG;rbs_spacer=5-10bp;gc_cont=0.513	Y
Acutalibacter_muris_B37_GCF_910576365.1	Firmicutes	Clostridia	Eubacteriales	Oscillospiraceae	Acutalibacter	r11c1	cyclic-lactone-autoinducer	c00011_NZ_CAJT...region001.gbk	5701	26379	20679	19	5700	26379	Acutalibacter_muris_B37_GCF_910576365.1__r11c1__ctg11_15	Acutalibacter_muris_B37_GCF_910576365.1__r11c1__ctg11_16		GCF_910576365.1/c00011_NZ_CAJT...region001_10 # 10560 # 10679 # 1 # ID=31089_10;partial=00;start_type=ATG;rbs_motif=AGGAG;rbs_spacer=5-10bp;gc_cont=0.508	Y
Acutalibacter_muris_B37_GCF_910576365.1	Firmicutes	Clostridia	Eubacteriales	Oscillospiraceae	Acutalibacter	r1c2	cyclic-lactone-autoinducer	c00001_NZ_CAJT...region002.gbk	127998	148153	20156	17	127997	148153		Acutalibacter_muris_B37_GCF_910576365.1__r1c2__ctg1_160			Y
Acutalibacter_muris_B37_GCF_910576365.1	Firmicutes	Clostridia	Eubacteriales	Oscillospiraceae	Acutalibacter	r4c1	cyclic-lactone-autoinducer	c00004_NZ_CAJT...region001.gbk	33332	54062	20731	22	33331	54062	Acutalibacter_muris_B37_GCF_910576365.1__r4c1__ctg4_54	Acutalibacter_muris_B37_GCF_910576365.1__r4c1__ctg4_53		GCF_910576365.1/c00004_NZ_CAJT...region001_11 # 10001 # 10156 # 1 # ID=31090_11;partial=00;start_type=ATG;rbs_motif=GGAGG;rbs_spacer=5-10bp;gc_cont=0.513	Y
Acutalibacter_muris_KB18_GCF_002201475.1	Firmicutes	Clostridia	Eubacteriales	Oscillospiraceae	Acutalibacter	r1c3	cyclic-lactone-autoinducer	NZ_CP021422.1.region003.gbk	2126939	2147126	20188	24	2126938	2147126	Acutalibacter_muris_KB18_GCF_002201475.1__r1c3__ctg1_2136	Acutalibacter_muris_KB18_GCF_002201475.1__r1c3__ctg1_2137		GCF_002201475.1/NZ_CP021422.1.region003_13 # 10085 # 10204 # 1 # ID=31535_13;partial=00;start_type=ATG;rbs_motif=AGGAG;rbs_spacer=5-10bp;gc_cont=0.508	Y
Acutalibacter_muris_KB18_GCF_002201475.1	Firmicutes	Clostridia	Eubacteriales	Oscillospiraceae	Acutalibacter	r1c4	cyclic-lactone-autoinducer	NZ_CP021422.1.region004.gbk	2182136	2202099	19964	24	2182135	2202099	Acutalibacter_muris_KB18_GCF_002201475.1__r1c4__ctg1_2193	Acutalibacter_muris_KB18_GCF_002201475.1__r1c4__ctg1_2194		GCF_002201475.1/NZ_CP021422.1.region004_13 # 10440 # 10559 # 1 # ID=31536_13;partial=00;start_type=ATG;rbs_motif=AGGAG;rbs_spacer=5-10bp;gc_cont=0.508	Y
Acutalibacter_muris_KB18_GCF_002201475.1	Firmicutes	Clostridia	Eubacteriales	Oscillospiraceae	Acutalibacter	r1c6	cyclic-lactone-autoinducer	NZ_CP021422.1.region006.gbk	3347943	3368098	20156	22	3347942	3368098		Acutalibacter_muris_KB18_GCF_002201475.1__r1c6__ctg1_3362			Y
Acutalibacter_muris_KB18_GCF_016697365.1	Firmicutes	Clostridia	Eubacteriales	Oscillospiraceae	Acutalibacter	r1c1	cyclic-lactone-autoinducer	NZ_CP065321.1.region001.gbk	224828	245015	20188	24	224827	245015	Acutalibacter_muris_KB18_GCF_016697365.1__r1c1__ctg1_247	Acutalibacter_muris_KB18_GCF_016697365.1__r1c1__ctg1_248		GCF_016697365.1/NZ_CP065321.1.region001_13 # 10085 # 10204 # 1 # ID=32059_13;partial=00;start_type=ATG;rbs_motif=AGGAG;rbs_spacer=5-10bp;gc_cont=0.508	Y
Acutalibacter_muris_KB18_GCF_016697365.1	Firmicutes	Clostridia	Eubacteriales	Oscillospiraceae	Acutalibacter	r1c2	cyclic-lactone-autoinducer	NZ_CP065321.1.region002.gbk	280025	299988	19964	24	280024	299988	Acutalibacter_muris_KB18_GCF_016697365.1__r1c2__ctg1_304	Acutalibacter_muris_KB18_GCF_016697365.1__r1c2__ctg1_305		GCF_016697365.1/NZ_CP065321.1.region002_13 # 10440 # 10559 # 1 # ID=32060_13;partial=00;start_type=ATG;rbs_motif=AGGAG;rbs_spacer=5-10bp;gc_cont=0.508	Y
Acutalibacter_muris_KB18_GCF_016697365.1	Firmicutes	Clostridia	Eubacteriales	Oscillospiraceae	Acutalibacter	r1c4	cyclic-lactone-autoinducer	NZ_CP065321.1.region004.gbk	1445832	1465987	20156	22	1445831	1465987		Acutalibacter_muris_KB18_GCF_016697365.1__r1c4__ctg1_1473			Y
Acutalibacter_muris_WYJ34-Z31_GCF_009917305.1	Firmicutes	Clostridia	Eubacteriales	Oscillospiraceae	Acutalibacter	r57c1	cyclic-lactone-autoinducer	NZ_QWLF01000047.region001.gbk	1530	15848	14319	16	1529	15848	Acutalibacter_muris_WYJ34-Z31_GCF_009917305.1__r57c1__ctg57_13	Acutalibacter_muris_WYJ34-Z31_GCF_009917305.1__r57c1__ctg57_14		GCF_009917305.1/NZ_QWLF01000047.region001_11 # 10560 # 10679 # 1 # ID=32459_11;partial=00;start_type=ATG;rbs_motif=AGGAG;rbs_spacer=5-10bp;gc_cont=0.492	Y
Acutalibacter_muris_WYJ34-Z31_GCF_009917305.1	Firmicutes	Clostridia	Eubacteriales	Oscillospiraceae	Acutalibacter	r62c1	cyclic-lactone-autoinducer	NZ_QWLF01000051.region001.gbk	1	12545	12545	14	0	12545	Acutalibacter_muris_WYJ34-Z31_GCF_009917305.1__r62c1__ctg62_9	Acutalibacter_muris_WYJ34-Z31_GCF_009917305.1__r62c1__ctg62_10		GCF_009917305.1/NZ_QWLF01000051.region001_9 # 8743 # 8898 # -1 # ID=32460_9;partial=00;start_type=ATG;rbs_motif=AGGAGG;rbs_spacer=5-10bp;gc_cont=0.532	Y
Acutalibacter_sp._1XD8-36_GCF_009917525.1	Firmicutes	Clostridia	Eubacteriales	Oscillospiraceae	Acutalibacter	r7c1	cyclic-lactone-autoinducer	NZ_QZDU01000016.region001.gbk	1	13921	13921	18	0	13921	Acutalibacter_sp._1XD8-36_GCF_009917525.1__r7c1__ctg7_6	Acutalibacter_sp._1XD8-36_GCF_009917525.1__r7c1__ctg7_5		GCF_009917525.1/NZ_QZDU01000016.region001_3 # 3218 # 3337 # -1 # ID=32845_3;partial=00;start_type=ATG;rbs_motif=AGGAG;rbs_spacer=5-10bp;gc_cont=0.500	Y
Acutalibacter_sp._1XD8-36_GCF_009917525.1	Firmicutes	Clostridia	Eubacteriales	Oscillospiraceae	Acutalibacter	r8c1	cyclic-lactone-autoinducer	NZ_QZDU01000017.region001.gbk	1	14039	14039	17	0	14039	Acutalibacter_sp._1XD8-36_GCF_009917525.1__r8c1__ctg8_5	Acutalibacter_sp._1XD8-36_GCF_009917525.1__r8c1__ctg8_4			Y
Aeribacillus_pallidus_GS3372_GCF_000948185.1	Firmicutes	Bacilli	Bacillales	Bacillaceae	Aeribacillus	r99c1	cyclic-lactone-autoinducer	NZ_JYCD01000099.region001.gbk	37856	58467	20612	18	37855	58467	Aeribacillus_pallidus_GS3372_GCF_000948185.1__r99c1__ctg99_42				N
Agathobaculum_butyriciproducens_1001099B_141217_D10_GCF_015552745.1	Firmicutes	Clostridia	Eubacteriales	Oscillospiraceae	Agathobaculum	r66c1	cyclic-lactone-autoinducer	c00066_NZ_JADN...region001.gbk	126115	146417	20303	17	126114	146417	Agathobaculum_butyriciproducens_1001099B_141217_D10_GCF_015552745.1__r66c1__ctg66_132	Agathobaculum_butyriciproducens_1001099B_141217_D10_GCF_015552745.1__r66c1__ctg66_132			Y
Agathobaculum_butyriciproducens_OF09-22XD_GCF_003434765.1	Firmicutes	Clostridia	Eubacteriales	Oscillospiraceae	Agathobaculum	r45c1	cyclic-lactone-autoinducer	NZ_QVFF01000005.region001.gbk	101613	122352	20740	19	101612	122352	Agathobaculum_butyriciproducens_OF09-22XD_GCF_003434765.1__r45c1__ctg45_116	Agathobaculum_butyriciproducens_OF09-22XD_GCF_003434765.1__r45c1__ctg45_117		GCF_003434765.1/NZ_QVFF01000005.region001_13 # 10594 # 10740 # 1 # ID=33551_13;partial=00;start_type=ATG;rbs_motif=AGGAGG;rbs_spacer=5-10bp;gc_cont=0.435	Y
Agathobaculum_butyriciproducens_OF09-27_GCF_003434755.1	Firmicutes	Clostridia	Eubacteriales	Oscillospiraceae	Agathobaculum	r18c1	cyclic-lactone-autoinducer	NZ_QVFE01000025.region001.gbk	11221	31960	20740	22	11220	31960	Agathobaculum_butyriciproducens_OF09-27_GCF_003434755.1__r18c1__ctg18_30	Agathobaculum_butyriciproducens_OF09-27_GCF_003434755.1__r18c1__ctg18_29		GCF_003434755.1/NZ_QVFE01000025.region001_10 # 10001 # 10147 # -1 # ID=33855_10;partial=00;start_type=ATG;rbs_motif=AGGAGG;rbs_spacer=5-10bp;gc_cont=0.429	Y
Agathobaculum_sp._M2_GCF_014288055.1	Firmicutes	Clostridia	Eubacteriales	Oscillospiraceae	Agathobaculum	r1c2	cyclic-lactone-autoinducer	c00001_NZ_JACO...region002.gbk	327537	348258	20722	30	327536	348258	Agathobaculum_sp._M2_GCF_014288055.1__r1c2__ctg1_325	Agathobaculum_sp._M2_GCF_014288055.1__r1c2__ctg1_326		GCF_014288055.1/c00001_NZ_JACO...region002_14 # 10588 # 10722 # 1 # ID=1_14;partial=00;start_type=ATG;rbs_motif=AGGAG;rbs_spacer=5-10bp;gc_cont=0.474	Y
Alkalibacter_sp._ES005_GCF_017352215.1	Firmicutes	Clostridia	Eubacteriales	Eubacteriaceae	Alkalibacter	r1c2	cyclic-lactone-autoinducer	NZ_CP071444.1.region002.gbk	1522714	1543410	20697	25	1522713	1543410	Alkalibacter_sp._ES005_GCF_017352215.1__r1c2__ctg1_1509	Alkalibacter_sp._ES005_GCF_017352215.1__r1c2__ctg1_1508			Y
Alkalibaculum_bacchi_DSM_22112_GCF_003317055.1	Firmicutes	Clostridia	Eubacteriales	Eubacteriaceae	Alkalibaculum	r24c1	cyclic-lactone-autoinducer	NZ_QNRX01000024.region001.gbk	21578	38670	17093	13	21577	38670	Alkalibaculum_bacchi_DSM_22112_GCF_003317055.1__r24c1__ctg24_27				N
Alkalibaculum_bacchi_DSM_22112_GCF_003317055.1	Firmicutes	Clostridia	Eubacteriales	Eubacteriaceae	Alkalibaculum	r7c1	cyclic-lactone-autoinducer	NZ_QNRX01000007.region001.gbk	96021	116730	20710	22	96020	116730	Alkalibaculum_bacchi_DSM_22112_GCF_003317055.1__r7c1__ctg7_107	Alkalibaculum_bacchi_DSM_22112_GCF_003317055.1__r7c1__ctg7_108			Y
Alkalibaculum_bacchi_DSM_221123_GCF_008086585.1	Firmicutes	Clostridia	Eubacteriales	Eubacteriaceae	Alkalibaculum	r15c1	cyclic-lactone-autoinducer	NZ_RXYD01000023.region001.gbk	21710	38834	17125	13	21709	38834	Alkalibaculum_bacchi_DSM_221123_GCF_008086585.1__r15c1__ctg15_27				N
Alkalibaculum_bacchi_DSM_221123_GCF_008086585.1	Firmicutes	Clostridia	Eubacteriales	Eubacteriaceae	Alkalibaculum	r36c1	cyclic-lactone-autoinducer	NZ_RXYD01000004.region001.gbk	43556	64265	20710	23	43555	64265	Alkalibaculum_bacchi_DSM_221123_GCF_008086585.1__r36c1__ctg36_47	Alkalibaculum_bacchi_DSM_221123_GCF_008086585.1__r36c1__ctg36_46			Y
Alkalibaculum_sporogenes_M08_DMB_GCF_009362815.1	Firmicutes	Clostridia	Eubacteriales	Eubacteriaceae	Alkalibaculum	r22c1	cyclic-lactone-autoinducer	NZ_WHNX01000002.region001.gbk	149557	170265	20709	20	149556	170265	Alkalibaculum_sporogenes_M08_DMB_GCF_009362815.1__r22c1__ctg22_148	Alkalibaculum_sporogenes_M08_DMB_GCF_009362815.1__r22c1__ctg22_147			Y
Alkalibaculum_sporogenes_M08_DMB_GCF_009362815.1	Firmicutes	Clostridia	Eubacteriales	Eubacteriaceae	Alkalibaculum	r88c1	cyclic-lactone-autoinducer	NZ_WHNX01000009.region001.gbk	78440	99236	20797	20	78439	99236	Alkalibaculum_sporogenes_M08_DMB_GCF_009362815.1__r88c1__ctg88_89	Alkalibaculum_sporogenes_M08_DMB_GCF_009362815.1__r88c1__ctg88_90		GCF_009362815.1/NZ_WHNX01000009.region001_13 # 10663 # 10797 # 1 # ID=40_13;partial=00;start_type=ATG;rbs_motif=GGAG/GAGG;rbs_spacer=5-10bp;gc_cont=0.348	Y
Alkalibaculum_sporogenes_M08_DMB_GCF_009362815.1	Firmicutes	Clostridia	Eubacteriales	Eubacteriaceae	Alkalibaculum	r8c1	cyclic-lactone-autoinducer	NZ_WHNX01000017.region001.gbk	32353	53083	20731	19	32352	53083	Alkalibaculum_sporogenes_M08_DMB_GCF_009362815.1__r8c1__ctg8_36	Alkalibaculum_sporogenes_M08_DMB_GCF_009362815.1__r8c1__ctg8_37			Y
Alkalicella_caledoniensis_LB2_GCF_014467015.1	Firmicutes	Clostridia	Eubacteriales	Proteinivoraceae	Alkalicella	r1c4	cyclic-lactone-autoinducer	NZ_CP058559.1.region004.gbk	2949548	2970285	20738	15	2949547	2970285	Alkalicella_caledoniensis_LB2_GCF_014467015.1__r1c4__ctg1_2861				N
Alkalihalobacillus_halodurans_C-125_GCF_000011145.1	Firmicutes	Bacilli	Bacillales	Bacillaceae	Alkalihalobacillus	r1c7	cyclic-lactone-autoinducer	NC_002570.2.region007.gbk	3574049	3594748	20700	24	3574048	3594748	Alkalihalobacillus_halodurans_C-125_GCF_000011145.1__r1c7__ctg1_3484	Alkalihalobacillus_halodurans_C-125_GCF_000011145.1__r1c7__ctg1_3483			Y
Alkalihalobacillus_halodurans_DSM_497_GCF_004376175.1	Firmicutes	Bacilli	Bacillales	Bacillaceae	Alkalihalobacillus	r100c1	cyclic-lactone-autoinducer	NZ_SNUY01000046.region001.gbk	223	20801	20579	23	222	20801	Alkalihalobacillus_halodurans_DSM_497_GCF_004376175.1__r100c1__ctg100_12				N
Alkalihalobacillus_halodurans_LB-1_GCF_005671335.1	Firmicutes	Bacilli	Bacillales	Bacillaceae	Alkalihalobacillus	r1c8	cyclic-lactone-autoinducer	NZ_CP040441.1.region008.gbk	3605154	3625850	20697	24	3605153	3625850	Alkalihalobacillus_halodurans_LB-1_GCF_005671335.1__r1c8__ctg1_3515	Alkalihalobacillus_halodurans_LB-1_GCF_005671335.1__r1c8__ctg1_3514			Y
Alkalihalobacillus_hemicellulosilyticus_JCM_9152_GCF_000513115.1	Firmicutes	Bacilli	Bacillales	Bacillaceae	Alkalihalobacillus	r91c1	cyclic-lactone-autoinducer	NZ_BAUU01000006.region001.gbk	13786	34527	20742	26	13785	34527	Alkalihalobacillus_hemicellulosilyticus_JCM_9152_GCF_000513115.1__r91c1__ctg91_27	Alkalihalobacillus_hemicellulosilyticus_JCM_9152_GCF_000513115.1__r91c1__ctg91_28		GCF_000513115.1/NZ_BAUU01000006.region001_16 # 10614 # 10742 # 1 # ID=66_16;partial=00;start_type=ATG;rbs_motif=GGAGG;rbs_spacer=5-10bp;gc_cont=0.395	Y
Alkalihalobacillus_hemicellulosilyticus_JCM_9152_GCF_001315065.1	Firmicutes	Bacilli	Bacillales	Bacillaceae	Alkalihalobacillus	r6c1	cyclic-lactone-autoinducer	NZ_BAZO01000006.region001.gbk	13786	34527	20742	26	13785	34527	Alkalihalobacillus_hemicellulosilyticus_JCM_9152_GCF_001315065.1__r6c1__ctg6_27	Alkalihalobacillus_hemicellulosilyticus_JCM_9152_GCF_001315065.1__r6c1__ctg6_28		GCF_001315065.1/NZ_BAZO01000006.region001_16 # 10614 # 10742 # 1 # ID=116_16;partial=00;start_type=ATG;rbs_motif=GGAGG;rbs_spacer=5-10bp;gc_cont=0.395	Y
Alkalihalobacillus_hwajinpoensis_22506_14_FS_GCF_009856375.1	Firmicutes	Bacilli	Bacillales	Bacillaceae	Alkalihalobacillus	r11c1	RiPP-like,cyclic-lactone-autoinducer	NZ_WMEY01000001.region001.gbk	491067	513987	22921	28	493242	513987	Alkalihalobacillus_hwajinpoensis_22506_14_FS_GCF_009856375.1__r11c1__ctg11_484	Alkalihalobacillus_hwajinpoensis_22506_14_FS_GCF_009856375.1__r11c1__ctg11_485		GCF_009856375.1/NZ_WMEY01000001.region001_19 # 12796 # 12921 # 1 # ID=2003_19;partial=00;start_type=ATG;rbs_motif=AGGAG;rbs_spacer=5-10bp;gc_cont=0.381	Y
Alkalihalobacillus_okuhidensis_DSM_13666_GCF_001274915.2	Firmicutes	Bacilli	Bacillales	Bacillaceae	Alkalihalobacillus	r65c1	cyclic-lactone-autoinducer	NZ_LILD02000064.region001.gbk	1	15586	15586	16	0	15586	Alkalihalobacillus_okuhidensis_DSM_13666_GCF_001274915.2__r65c1__ctg65_9	Alkalihalobacillus_okuhidensis_DSM_13666_GCF_001274915.2__r65c1__ctg65_8			Y
Alkalihalobacillus_urbisdiaboli_FJAT-45385_GCF_002156385.1	Firmicutes	Bacilli	Bacillales	Bacillaceae	Alkalihalobacillus	r4c2	cyclic-lactone-autoinducer	NZ_MVJM01000002.region002.gbk	1037443	1058462	21020	19	1037442	1058462	Alkalihalobacillus_urbisdiaboli_FJAT-45385_GCF_002156385.1__r4c2__ctg4_983	Alkalihalobacillus_urbisdiaboli_FJAT-45385_GCF_002156385.1__r4c2__ctg4_985::Alkalihalobacillus_urbisdiaboli_FJAT-45385_GCF_002156385.1__r4c2__ctg4_986			Y
Alkaliphilus_halophilus_DSM_24577_GCF_016908435.1	Firmicutes	Clostridia	Eubacteriales	Clostridiaceae	Alkaliphilus	r13c1	cyclic-lactone-autoinducer	c00013_NZ_JAFB...region001.gbk	13365	34130	20766	14	13364	34130	Alkaliphilus_halophilus_DSM_24577_GCF_016908435.1__r13c1__ctg13_21	Alkaliphilus_halophilus_DSM_24577_GCF_016908435.1__r13c1__ctg13_22		GCF_016908435.1/c00013_NZ_JAFB...region001_9 # 10644 # 10766 # 1 # ID=4704_9;partial=00;start_type=ATG;rbs_motif=GGAG/GAGG;rbs_spacer=5-10bp;gc_cont=0.293	Y
Alkaliphilus_halophilus_DSM_24577_GCF_016908435.1	Firmicutes	Clostridia	Eubacteriales	Clostridiaceae	Alkaliphilus	r8c1	cyclic-lactone-autoinducer	c00008_NZ_JAFB...region001.gbk	73078	93814	20737	18	73077	93814	Alkaliphilus_halophilus_DSM_24577_GCF_016908435.1__r8c1__ctg8_70	Alkaliphilus_halophilus_DSM_24577_GCF_016908435.1__r8c1__ctg8_71		GCF_016908435.1/c00008_NZ_JAFB...region001_9 # 10603 # 10737 # 1 # ID=4705_9;partial=00;start_type=ATG;rbs_motif=GGA/GAG/AGG;rbs_spacer=5-10bp;gc_cont=0.333	Y
Alkaliphilus_halophilus_DSM_24577_GCF_016908435.1	Firmicutes	Clostridia	Eubacteriales	Clostridiaceae	Alkaliphilus	r9c1	cyclic-lactone-autoinducer	c00009_NZ_JAFB...region001.gbk	79638	93704	14067	15	79637	93704	Alkaliphilus_halophilus_DSM_24577_GCF_016908435.1__r9c1__ctg9_86	Alkaliphilus_halophilus_DSM_24577_GCF_016908435.1__r9c1__ctg9_87			Y
Alkaliphilus_hydrothermalis_DSM_25890_GCF_016908555.1	Firmicutes	Clostridia	Eubacteriales	Clostridiaceae	Alkaliphilus	r13c1	cyclic-lactone-autoinducer,ranthipeptide	c00013_NZ_JAFB...region001.gbk	55602	81142	25541	24	55601	76357	Alkaliphilus_hydrothermalis_DSM_25890_GCF_016908555.1__r13c1__ctg13_55	Alkaliphilus_hydrothermalis_DSM_25890_GCF_016908555.1__r13c1__ctg13_56	Alkaliphilus_hydrothermalis_DSM_25890_GCF_016908555.1__r13c1__ctg13_50	GCF_016908555.1/c00013_NZ_JAFB...region001_10 # 10637 # 10756 # 1 # ID=4707_10;partial=00;start_type=ATG;rbs_motif=GGAG/GAGG;rbs_spacer=5-10bp;gc_cont=0.325	Y
Alkaliphilus_metalliredigens_QYMF_GCF_000016985.1	Firmicutes	Clostridia	Eubacteriales	Clostridiaceae	Alkaliphilus	r1c1	RiPP-like,cyclic-lactone-autoinducer	NC_009633.1.region001.gbk	105840	125219	19380	23	105839	125219	Alkaliphilus_metalliredigens_QYMF_GCF_000016985.1__r1c1__ctg1_108	Alkaliphilus_metalliredigens_QYMF_GCF_000016985.1__r1c1__ctg1_107			Y
Alkaliphilus_metalliredigens_QYMF_GCF_000016985.1	Firmicutes	Clostridia	Eubacteriales	Clostridiaceae	Alkaliphilus	r1c2	cyclic-lactone-autoinducer	NC_009633.1.region002.gbk	131924	150611	18688	20	131923	150611	Alkaliphilus_metalliredigens_QYMF_GCF_000016985.1__r1c2__ctg1_134				N
Alkaliphilus_metalliredigens_QYMF_GCF_000016985.1	Firmicutes	Clostridia	Eubacteriales	Clostridiaceae	Alkaliphilus	r1c4	cyclic-lactone-autoinducer	NC_009633.1.region004.gbk	646753	666534	19782	23	646752	666534	Alkaliphilus_metalliredigens_QYMF_GCF_000016985.1__r1c4__ctg1_636	Alkaliphilus_metalliredigens_QYMF_GCF_000016985.1__r1c4__ctg1_637			Y
Alkaliphilus_metalliredigens_QYMF_GCF_000016985.1	Firmicutes	Clostridia	Eubacteriales	Clostridiaceae	Alkaliphilus	r1c6	cyclic-lactone-autoinducer	NC_009633.1.region006.gbk	1322256	1341489	19234	17	1322255	1341489	Alkaliphilus_metalliredigens_QYMF_GCF_000016985.1__r1c6__ctg1_1290	Alkaliphilus_metalliredigens_QYMF_GCF_000016985.1__r1c6__ctg1_1291		GCF_000016985.1/NC_009633.1.region006_10 # 9995 # 10129 # 1 # ID=4715_10;partial=00;start_type=ATG;rbs_motif=AGGAG;rbs_spacer=5-10bp;gc_cont=0.385	Y
Alkaliphilus_metalliredigens_QYMF_GCF_000016985.1	Firmicutes	Clostridia	Eubacteriales	Clostridiaceae	Alkaliphilus	r1c9	cyclic-lactone-autoinducer	NC_009633.1.region009.gbk	4165681	4186262	20582	23	4165680	4186262	Alkaliphilus_metalliredigens_QYMF_GCF_000016985.1__r1c9__ctg1_4085				N
Alkaliphilus_oremlandii_OhILAs_GCF_000018325.1	Firmicutes	Clostridia	Eubacteriales	Clostridiaceae	Alkaliphilus	r1c1	cyclic-lactone-autoinducer	NC_009922.1.region001.gbk	265624	283120	17497	14	265623	283120	Alkaliphilus_oremlandii_OhILAs_GCF_000018325.1__r1c1__ctg1_247	Alkaliphilus_oremlandii_OhILAs_GCF_000018325.1__r1c1__ctg1_248			Y
Alkaliphilus_oremlandii_OhILAs_GCF_000018325.1	Firmicutes	Clostridia	Eubacteriales	Clostridiaceae	Alkaliphilus	r1c2	cyclic-lactone-autoinducer	NC_009922.1.region002.gbk	472905	492638	19734	18	472904	492638	Alkaliphilus_oremlandii_OhILAs_GCF_000018325.1__r1c2__ctg1_442	Alkaliphilus_oremlandii_OhILAs_GCF_000018325.1__r1c2__ctg1_443		GCF_000018325.1/NC_009922.1.region002_12 # 10214 # 10345 # 1 # ID=4717_12;partial=00;start_type=ATG;rbs_motif=AGxAGG/AGGxGG;rbs_spacer=5-10bp;gc_cont=0.386	Y
Alkaliphilus_oremlandii_OhILAs_GCF_000018325.1	Firmicutes	Clostridia	Eubacteriales	Clostridiaceae	Alkaliphilus	r1c4	cyclic-lactone-autoinducer	NC_009922.1.region004.gbk	2383898	2404604	20707	21	2383897	2404604	Alkaliphilus_oremlandii_OhILAs_GCF_000018325.1__r1c4__ctg1_2337	Alkaliphilus_oremlandii_OhILAs_GCF_000018325.1__r1c4__ctg1_2338			Y
Alkaliphilus_peptidifermentans_DSM_18978_GCF_900101495.1	Firmicutes	Clostridia	Eubacteriales	Clostridiaceae	Alkaliphilus	r50c1	cyclic-lactone-autoinducer	NZ_FMUS01000009.region001.gbk	62696	83415	20720	26	62695	83415	Alkaliphilus_peptidifermentans_DSM_18978_GCF_900101495.1__r50c1__ctg50_75	Alkaliphilus_peptidifermentans_DSM_18978_GCF_900101495.1__r50c1__ctg50_74		GCF_900101495.1/NZ_FMUS01000009.region001_16 # 10001 # 10123 # -1 # ID=4783_16;partial=00;start_type=ATG;rbs_motif=AGGAG;rbs_spacer=5-10bp;gc_cont=0.341	Y
Alkaliphilus_peptidifermentans_DSM_18978_GCF_900101495.1	Firmicutes	Clostridia	Eubacteriales	Clostridiaceae	Alkaliphilus	r58c1	cyclic-lactone-autoinducer	NZ_FMUS01000030.region001.gbk	43762	57805	14044	17	43761	57805		Alkaliphilus_peptidifermentans_DSM_18978_GCF_900101495.1__r58c1__ctg58_52			Y
Alkaliphilus_pronyensis_LacV_GCF_009017275.1	Firmicutes	Clostridia	Eubacteriales	Clostridiaceae	Alkaliphilus	r25c1	cyclic-lactone-autoinducer	NZ_WBZC01000031.region001.gbk	6569	27282	20714	26	6568	27282	Alkaliphilus_pronyensis_LacV_GCF_009017275.1__r25c1__ctg25_17	Alkaliphilus_pronyensis_LacV_GCF_009017275.1__r25c1__ctg25_18		GCF_009017275.1/NZ_WBZC01000031.region001_12 # 10595 # 10714 # 1 # ID=4784_12;partial=00;start_type=ATG;rbs_motif=AGGAG;rbs_spacer=5-10bp;gc_cont=0.317	Y
Alkaliphilus_serpentinus_LacT_GCF_009017255.1	Firmicutes	Clostridia	Eubacteriales	Clostridiaceae	Alkaliphilus	r30c1	cyclic-lactone-autoinducer	NZ_WBZB01000036.region001.gbk	34467	54210	19744	22	34466	54210	Alkaliphilus_serpentinus_LacT_GCF_009017255.1__r30c1__ctg30_44	Alkaliphilus_serpentinus_LacT_GCF_009017255.1__r30c1__ctg30_43		GCF_009017255.1/NZ_WBZB01000036.region001_13 # 10001 # 10123 # -1 # ID=5346_13;partial=00;start_type=ATG;rbs_motif=AGxAGG/AGGxGG;rbs_spacer=11-12bp;gc_cont=0.333	Y
Alkaliphilus_serpentinus_LacT_GCF_009017255.1	Firmicutes	Clostridia	Eubacteriales	Clostridiaceae	Alkaliphilus	r9c1	cyclic-lactone-autoinducer	NZ_WBZB01000017.region001.gbk	80149	90901	10753	10	80148	90901	Alkaliphilus_serpentinus_LacT_GCF_009017255.1__r9c1__ctg9_74	Alkaliphilus_serpentinus_LacT_GCF_009017255.1__r9c1__ctg9_75		GCF_009017255.1/NZ_WBZB01000017.region001_11 # 10608 # 10724 # 1 # ID=5347_11;partial=00;start_type=ATG;rbs_motif=GGAGG;rbs_spacer=5-10bp;gc_cont=0.359	Y
Alkaliphilus_sp._B6464_GCF_018141165.1	Firmicutes	Clostridia	Eubacteriales	Clostridiaceae	Alkaliphilus	r1c1	cyclic-lactone-autoinducer	NZ_CP058557.1.region001.gbk	1385113	1402118	17006	13	1385112	1402118	Alkaliphilus_sp._B6464_GCF_018141165.1__r1c1__ctg1_1265	Alkaliphilus_sp._B6464_GCF_018141165.1__r1c1__ctg1_1266		GCF_018141165.1/NZ_CP058557.1.region001_7 # 8452 # 8574 # 1 # ID=9541_7;partial=00;start_type=ATG;rbs_motif=AGGAG;rbs_spacer=5-10bp;gc_cont=0.293	Y
Alkaliphilus_sp._B6464_GCF_018141165.1	Firmicutes	Clostridia	Eubacteriales	Clostridiaceae	Alkaliphilus	r1c2	cyclic-lactone-autoinducer	NZ_CP058557.1.region002.gbk	1613129	1633865	20737	17	1613128	1633865	Alkaliphilus_sp._B6464_GCF_018141165.1__r1c2__ctg1_1474	Alkaliphilus_sp._B6464_GCF_018141165.1__r1c2__ctg1_1475		GCF_018141165.1/NZ_CP058557.1.region002_12 # 10606 # 10737 # 1 # ID=9542_12;partial=00;start_type=ATG;rbs_motif=GGA/GAG/AGG;rbs_spacer=5-10bp;gc_cont=0.333	Y
Alkaliphilus_sp._B6464_GCF_018141165.1	Firmicutes	Clostridia	Eubacteriales	Clostridiaceae	Alkaliphilus	r2c1	cyclic-lactone-autoinducer	NZ_CP058558.1.region001.gbk	125453	146082	20630	22	125452	146082	Alkaliphilus_sp._B6464_GCF_018141165.1__r2c1__ctg2_184				N
Alkaliphilus_sp._MSJ-5_GCF_018919215.1	Firmicutes	Clostridia	Eubacteriales	Clostridiaceae	Alkaliphilus	r1c1	cyclic-lactone-autoinducer	c00001_NZ_JAHL...region001.gbk	233302	253868	20567	18	233301	253868	Alkaliphilus_sp._MSJ-5_GCF_018919215.1__r1c1__ctg1_218				N
Alkaliphilus_sp._MSJ-5_GCF_018919215.1	Firmicutes	Clostridia	Eubacteriales	Clostridiaceae	Alkaliphilus	r9c1	cyclic-lactone-autoinducer	c00009_NZ_JAHL...region001.gbk	274473	291491	17019	13	274472	291491	Alkaliphilus_sp._MSJ-5_GCF_018919215.1__r9c1__ctg9_263	Alkaliphilus_sp._MSJ-5_GCF_018919215.1__r9c1__ctg9_264		GCF_018919215.1/c00009_NZ_JAHL...region001_7 # 8455 # 8577 # 1 # ID=9543_7;partial=00;start_type=ATG;rbs_motif=AGGAG;rbs_spacer=5-10bp;gc_cont=0.285	Y
Alkaliphilus_sp._MSJ-5_GCF_018919215.1	Firmicutes	Clostridia	Eubacteriales	Clostridiaceae	Alkaliphilus	r9c2	cyclic-lactone-autoinducer	c00009_NZ_JAHL...region002.gbk	540747	561483	20737	17	540746	561483	Alkaliphilus_sp._MSJ-5_GCF_018919215.1__r9c2__ctg9_512	Alkaliphilus_sp._MSJ-5_GCF_018919215.1__r9c2__ctg9_513		GCF_018919215.1/c00009_NZ_JAHL...region002_10 # 10606 # 10737 # 1 # ID=9544_10;partial=00;start_type=ATG;rbs_motif=GGA/GAG/AGG;rbs_spacer=5-10bp;gc_cont=0.318	Y
Alteribacter_populi_FJAT-45347_GCF_002352765.1	Firmicutes	Bacilli	Bacillales	Bacillaceae	Alteribacter	r1c3	LAP,cyclic-lactone-autoinducer,thiopeptide	NZ_KZ293963.1.region003.gbk	2863219	2889518	26300	25	2863218	2883976	Alteribacter_populi_FJAT-45347_GCF_002352765.1__r1c3__ctg1_2743	Alteribacter_populi_FJAT-45347_GCF_002352765.1__r1c3__ctg1_2742		GCF_002352765.1/NZ_KZ293963.1.region003_12 # 10001 # 10159 # -1 # ID=9545_12;partial=00;start_type=ATG;rbs_motif=AGGAGG;rbs_spacer=5-10bp;gc_cont=0.346	Y
Aminipila_butyrica_DSM_103574_GCF_010669305.1	Firmicutes	Clostridia	Eubacteriales	Eubacteriales Family XIII. Incertae Sedis	Aminipila	r1c1	cyclic-lactone-autoinducer	NZ_CP048649.1.region001.gbk	754094	774802	20709	19	754093	774802	Aminipila_butyrica_DSM_103574_GCF_010669305.1__r1c1__ctg1_739	Aminipila_butyrica_DSM_103574_GCF_010669305.1__r1c1__ctg1_738		GCF_010669305.1/NZ_CP048649.1.region001_8 # 10001 # 10135 # -1 # ID=10351_8;partial=00;start_type=ATG;rbs_motif=AGGA;rbs_spacer=5-10bp;gc_cont=0.393	Y
Aminipila_sp._JN-18_GCF_004103735.1	Firmicutes	Clostridia	Eubacteriales	Eubacteriales Family XIII. Incertae Sedis	Aminipila	r1c1	cyclic-lactone-autoinducer	NZ_CP035281.1.region001.gbk	437639	458347	20709	19	437638	458347	Aminipila_sp._JN-18_GCF_004103735.1__r1c1__ctg1_414	Aminipila_sp._JN-18_GCF_004103735.1__r1c1__ctg1_413		GCF_004103735.1/NZ_CP035281.1.region001_9 # 10001 # 10135 # -1 # ID=10352_9;partial=00;start_type=ATG;rbs_motif=AGGA/GGAG/GAGG;rbs_spacer=11-12bp;gc_cont=0.407	Y
Aminipila_terrae_CBA3637_GCF_010120715.1	Firmicutes	Clostridia	Eubacteriales	Eubacteriales Family XIII. Incertae Sedis	Aminipila	r1c1	cyclic-lactone-autoinducer	NZ_CP047591.1.region001.gbk	1070073	1090781	20709	19	1070072	1090781	Aminipila_terrae_CBA3637_GCF_010120715.1__r1c1__ctg1_1060	Aminipila_terrae_CBA3637_GCF_010120715.1__r1c1__ctg1_1061		GCF_010120715.1/NZ_CP047591.1.region001_13 # 10575 # 10709 # 1 # ID=10353_13;partial=00;start_type=ATG;rbs_motif=AGGA/GGAG/GAGG;rbs_spacer=11-12bp;gc_cont=0.319	Y
Ammoniphilus_sp._CFH_90114_GCF_004123195.1	Firmicutes	Bacilli	Bacillales	Paenibacillaceae	Ammoniphilus	r2c1	cyclic-lactone-autoinducer	NZ_SDLI01000010.region001.gbk	150014	170702	20689	19	150013	170702	Ammoniphilus_sp._CFH_90114_GCF_004123195.1__r2c1__ctg2_123	Ammoniphilus_sp._CFH_90114_GCF_004123195.1__r2c1__ctg2_122		GCF_004123195.1/NZ_SDLI01000010.region001_7 # 10001 # 10129 # -1 # ID=10354_7;partial=00;start_type=GTG;rbs_motif=GGAGG;rbs_spacer=5-10bp;gc_cont=0.341	Y
Anaerobacillus_alkalidiazotrophicus_DSM_22531_GCF_001866055.1	Firmicutes	Bacilli	Bacillales	Bacillaceae	Anaerobacillus	r7c1	cyclic-lactone-autoinducer	NZ_MLQS01000007.region001.gbk	99375	120123	20749	19	99374	120123	Anaerobacillus_alkalidiazotrophicus_DSM_22531_GCF_001866055.1__r7c1__ctg7_103	Anaerobacillus_alkalidiazotrophicus_DSM_22531_GCF_001866055.1__r7c1__ctg7_104		GCF_001866055.1/NZ_MLQS01000007.region001_9 # 10621 # 10749 # 1 # ID=10374_9;partial=00;start_type=ATG;rbs_motif=GGA/GAG/AGG;rbs_spacer=11-12bp;gc_cont=0.295	Y
Anaerobacillus_alkalilacustris_DSM_18345_GCF_001866005.1	Firmicutes	Bacilli	Bacillales	Bacillaceae	Anaerobacillus	r32c1	cyclic-lactone-autoinducer	NZ_MLQR01000032.region001.gbk	1	17798	17798	18	0	17798	Anaerobacillus_alkalilacustris_DSM_18345_GCF_001866005.1__r32c1__ctg32_11	Anaerobacillus_alkalilacustris_DSM_18345_GCF_001866005.1__r32c1__ctg32_10		GCF_001866005.1/NZ_MLQR01000032.region001_10 # 7050 # 7178 # -1 # ID=10375_10;partial=00;start_type=ATG;rbs_motif=AGGAG;rbs_spacer=5-10bp;gc_cont=0.318	Y
Anaerobacillus_arseniciselenatis_DSM_15340_GCF_001865995.1	Firmicutes	Bacilli	Bacillales	Bacillaceae	Anaerobacillus	r36c1	cyclic-lactone-autoinducer	NZ_MLQQ01000036.region001.gbk	1	5066	5066	9	0	5066	Anaerobacillus_arseniciselenatis_DSM_15340_GCF_001865995.1__r36c1__ctg36_3	Anaerobacillus_arseniciselenatis_DSM_15340_GCF_001865995.1__r36c1__ctg36_4			Y
Anaerobacillus_isosaccharinicus_NB2006_GCF_001866075.3	Firmicutes	Bacilli	Bacillales	Bacillaceae	Anaerobacillus	r1c1	cyclic-lactone-autoinducer	NZ_CP063356.1.region001.gbk	353919	374678	20760	20	353918	374678	Anaerobacillus_isosaccharinicus_NB2006_GCF_001866075.3__r1c1__ctg1_361	Anaerobacillus_isosaccharinicus_NB2006_GCF_001866075.3__r1c1__ctg1_360		GCF_001866075.3/NZ_CP063356.1.region001_10 # 10001 # 10138 # -1 # ID=13597_10;partial=00;start_type=ATG;rbs_motif=GGAG/GAGG;rbs_spacer=5-10bp;gc_cont=0.355	Y
Anaerobacterium_chartisolvens_DSM_27016_GCF_003337415.1	Firmicutes	Clostridia	Eubacteriales	Oscillospiraceae	Anaerobacterium	r16c1	cyclic-lactone-autoinducer	NZ_QPJT01000016.region001.gbk	1	10636	10636	15	0	10636		Anaerobacterium_chartisolvens_DSM_27016_GCF_003337415.1__r16c1__ctg16_2			Y
Anaerobacterium_chartisolvens_DSM_27016_GCF_003337415.1	Firmicutes	Clostridia	Eubacteriales	Oscillospiraceae	Anaerobacterium	r29c1	cyclic-lactone-autoinducer	NZ_QPJT01000029.region001.gbk	37153	48687	11535	13	37152	48687		Anaerobacterium_chartisolvens_DSM_27016_GCF_003337415.1__r29c1__ctg29_45			Y
Anaerobacterium_chartisolvens_DSM_27016_GCF_003337415.1	Firmicutes	Clostridia	Eubacteriales	Oscillospiraceae	Anaerobacterium	r30c1	cyclic-lactone-autoinducer	NZ_QPJT01000030.region001.gbk	1	16767	16767	15	0	16767	Anaerobacterium_chartisolvens_DSM_27016_GCF_003337415.1__r30c1__ctg30_7				N
Anaerobacterium_chartisolvens_DSM_27016_GCF_003337415.1	Firmicutes	Clostridia	Eubacteriales	Oscillospiraceae	Anaerobacterium	r34c1	cyclic-lactone-autoinducer	NZ_QPJT01000034.region001.gbk	12873	33624	20752	19	12872	33624	Anaerobacterium_chartisolvens_DSM_27016_GCF_003337415.1__r34c1__ctg34_25	Anaerobacterium_chartisolvens_DSM_27016_GCF_003337415.1__r34c1__ctg34_26		GCF_003337415.1/NZ_QPJT01000034.region001_13 # 10600 # 10752 # 1 # ID=13613_13;partial=00;start_type=ATG;rbs_motif=GGAGG;rbs_spacer=5-10bp;gc_cont=0.464	Y
Anaerobacterium_chartisolvens_DSM_27016_GCF_003337415.1	Firmicutes	Clostridia	Eubacteriales	Oscillospiraceae	Anaerobacterium	r41c1	cyclic-lactone-autoinducer	NZ_QPJT01000041.region001.gbk	14694	25989	11296	16	14693	25989		Anaerobacterium_chartisolvens_DSM_27016_GCF_003337415.1__r41c1__ctg41_30			Y
Anaerobacterium_chartisolvens_DSM_27016_GCF_003337415.1	Firmicutes	Clostridia	Eubacteriales	Oscillospiraceae	Anaerobacterium	r5c2	cyclic-lactone-autoinducer	NZ_QPJT01000005.region002.gbk	183959	204099	20141	16	183958	204099		Anaerobacterium_chartisolvens_DSM_27016_GCF_003337415.1__r5c2__ctg5_149			Y
Anaerobacterium_chartisolvens_DSM_27016_GCF_003337415.1	Firmicutes	Clostridia	Eubacteriales	Oscillospiraceae	Anaerobacterium	r6c1	cyclic-lactone-autoinducer	NZ_QPJT01000006.region001.gbk	91175	127666	36492	29	91174	127666		Anaerobacterium_chartisolvens_DSM_27016_GCF_003337415.1__r6c1__ctg6_88::Anaerobacterium_chartisolvens_DSM_27016_GCF_003337415.1__r6c1__ctg6_99			Y
Anaerobium_acetethylicum_GluBS11_GCF_900096945.1	Firmicutes	Clostridia	Eubacteriales	Lachnospiraceae	Anaerobium	r16c1	cyclic-lactone-autoinducer	NZ_FMKA01000030.region001.gbk	1	20751	20751	18	0	20751	Anaerobium_acetethylicum_GluBS11_GCF_900096945.1__r16c1__ctg16_12	Anaerobium_acetethylicum_GluBS11_GCF_900096945.1__r16c1__ctg16_13		GCF_900096945.1/NZ_FMKA01000030.region001_12 # 10623 # 10751 # 1 # ID=13614_12;partial=00;start_type=ATG;rbs_motif=AGGAG;rbs_spacer=5-10bp;gc_cont=0.395	Y
Anaerobium_acetethylicum_GluBS11_GCF_900096945.1	Firmicutes	Clostridia	Eubacteriales	Lachnospiraceae	Anaerobium	r39c1	cyclic-lactone-autoinducer	NZ_FMKA01000013.region001.gbk	88016	100306	12291	13	88015	100306	Anaerobium_acetethylicum_GluBS11_GCF_900096945.1__r39c1__ctg39_88			GCF_900096945.1/NZ_FMKA01000013.region001_16 # 10584 # 10733 # 1 # ID=13615_16;partial=00;start_type=ATG;rbs_motif=AGGAG;rbs_spacer=5-10bp;gc_cont=0.340	Y
Anaerobutyricum_hallii_AF31-17AC_GCF_003475545.1	Firmicutes	Clostridia	Eubacteriales	Lachnospiraceae	Anaerobutyricum	r119c1	cyclic-lactone-autoinducer	NZ_QRQO01000092.region001.gbk	1	8836	8836	15	0	8836	Anaerobutyricum_hallii_AF31-17AC_GCF_003475545.1__r119c1__ctg119_5	Anaerobutyricum_hallii_AF31-17AC_GCF_003475545.1__r119c1__ctg119_4			Y
Anaerobutyricum_hallii_AF31-17AC_GCF_003475545.1	Firmicutes	Clostridia	Eubacteriales	Lachnospiraceae	Anaerobutyricum	r2c1	NRPS,cyclic-lactone-autoinducer	NZ_QRQO01000010.region001.gbk	24119	70691	46573	31	43816	64559	Anaerobutyricum_hallii_AF31-17AC_GCF_003475545.1__r2c1__ctg2_57	Anaerobutyricum_hallii_AF31-17AC_GCF_003475545.1__r2c1__ctg2_58		GCF_003475545.1/NZ_QRQO01000010.region001_25 # 30283 # 30441 # -1 # ID=13617_25;partial=00;start_type=ATG;rbs_motif=AGGAGG;rbs_spacer=5-10bp;gc_cont=0.421	Y
Anaerobutyricum_hallii_DSM_3353_GCF_000173975.1	Firmicutes	Clostridia	Eubacteriales	Lachnospiraceae	Anaerobutyricum	r132c1	NRPS,cyclic-lactone-autoinducer	NZ_ACEP01000029.region001.gbk	33643	84797	51155	37	39774	60517	Anaerobutyricum_hallii_DSM_3353_GCF_000173975.1__r132c1__ctg132_36	Anaerobutyricum_hallii_DSM_3353_GCF_000173975.1__r132c1__ctg132_35		GCF_000173975.1/NZ_ACEP01000029.region001_8 # 16133 # 16291 # 1 # ID=14425_8;partial=00;start_type=ATG;rbs_motif=AGGAGG;rbs_spacer=5-10bp;gc_cont=0.421	Y
Anaerobutyricum_hallii_EH1_GCF_900209925.1	Firmicutes	Clostridia	Eubacteriales	Lachnospiraceae	Anaerobutyricum	r1c2	NRPS,RRE-containing,cyclic-lactone-autoinducer	NZ_LT907978.1.region002.gbk	1540743	1608482	67740	52	1588496	1598086	Anaerobutyricum_hallii_EH1_GCF_900209925.1__r1c2__ctg1_1378	Anaerobutyricum_hallii_EH1_GCF_900209925.1__r1c2__ctg1_1379		GCF_900209925.1/NZ_LT907978.1.region002_49 # 51451 # 51609 # -1 # ID=14466_49;partial=00;start_type=ATG;rbs_motif=AGGAGG;rbs_spacer=5-10bp;gc_cont=0.415	Y
Anaerobutyricum_hallii_EH1_GCF_900209925.1	Firmicutes	Clostridia	Eubacteriales	Lachnospiraceae	Anaerobutyricum	r1c3	cyclic-lactone-autoinducer,lanthipeptide-class-ii	NZ_LT907978.1.region003.gbk	2766795	2803854	37060	41	2766794	2787537	Anaerobutyricum_hallii_EH1_GCF_900209925.1__r1c3__ctg1_2437	Anaerobutyricum_hallii_EH1_GCF_900209925.1__r1c3__ctg1_2438	Anaerobutyricum_hallii_EH1_GCF_900209925.1__r1c3__ctg1_2427	GCF_900209925.1/NZ_LT907978.1.region003_15 # 10594 # 10743 # -1 # ID=14467_15;partial=00;start_type=ATG;rbs_motif=AGGAG;rbs_spacer=5-10bp;gc_cont=0.380	Y
Anaerobutyricum_hallii_EHAL_GCF_018140635.1	Firmicutes	Clostridia	Eubacteriales	Lachnospiraceae	Anaerobutyricum	r1c2	NRPS,cyclic-lactone-autoinducer	NZ_CP073280.1.region002.gbk	2557457	2608611	51155	37	2581736	2602479	Anaerobutyricum_hallii_EHAL_GCF_018140635.1__r1c2__ctg1_2242	Anaerobutyricum_hallii_EHAL_GCF_018140635.1__r1c2__ctg1_2243		GCF_018140635.1/NZ_CP073280.1.region002_31 # 34865 # 35023 # -1 # ID=14468_31;partial=00;start_type=ATG;rbs_motif=AGGAGG;rbs_spacer=5-10bp;gc_cont=0.421	Y
Anaerobutyricum_hallii_TM10-1AC_GCF_003466185.1	Firmicutes	Clostridia	Eubacteriales	Lachnospiraceae	Anaerobutyricum	r79c1	cyclic-lactone-autoinducer	NZ_QSOE01000017.region001.gbk	27942	38867	10926	15	27941	38867	Anaerobutyricum_hallii_TM10-1AC_GCF_003466185.1__r79c1__ctg79_46			GCF_003466185.1/NZ_QSOE01000017.region001_14 # 10593 # 10697 # 1 # ID=14474_14;partial=00;start_type=ATG;rbs_motif=AGGAG;rbs_spacer=5-10bp;gc_cont=0.352	Y
Anaerobutyricum_soehngenii_MSJ-10_GCF_018917895.1	Firmicutes	Clostridia	Eubacteriales	Lachnospiraceae	Anaerobutyricum	r6c1	cyclic-lactone-autoinducer,lanthipeptide-class-ii	c00006_NZ_JAHL...region001.gbk	1	43767	43767	51	17633	43767	Anaerobutyricum_soehngenii_MSJ-10_GCF_018917895.1__r6c1__ctg6_26::Anaerobutyricum_soehngenii_MSJ-10_GCF_018917895.1__r6c1__ctg6_34	Anaerobutyricum_soehngenii_MSJ-10_GCF_018917895.1__r6c1__ctg6_25::Anaerobutyricum_soehngenii_MSJ-10_GCF_018917895.1__r6c1__ctg6_33		GCF_018917895.1/c00006_NZ_JAHL...region001_26 # 27721 # 27870 # 1 # ID=14488_26;partial=00;start_type=ATG;rbs_motif=AGGAG;rbs_spacer=5-10bp;gc_cont=0.367	Y
Anaerobutyricum_soehngenii_SL6_1_1_GCF_017776335.1	Firmicutes	Clostridia	Eubacteriales	Lachnospiraceae	Anaerobutyricum	r2c1	NRPS,NRPS-like,cyclic-lactone-autoinducer	c00002_NZ_JAFI...region001.gbk	43305	98508	55204	40	49436	70179	Anaerobutyricum_soehngenii_SL6_1_1_GCF_017776335.1__r2c1__ctg2_49	Anaerobutyricum_soehngenii_SL6_1_1_GCF_017776335.1__r2c1__ctg2_48		GCF_017776335.1/c00002_NZ_JAFI...region001_9 # 16133 # 16291 # 1 # ID=14501_9;partial=00;start_type=ATG;rbs_motif=AGGAGG;rbs_spacer=5-10bp;gc_cont=0.421	Y
Anaerocolumna_aminovalerica_DSM_1283_GCF_900115365.1	Firmicutes	Clostridia	Eubacteriales	Lachnospiraceae	Anaerocolumna	r31c1	cyclic-lactone-autoinducer	NZ_FOWD01000018.region001.gbk	3242	21406	18165	18	3241	21406	Anaerocolumna_aminovalerica_DSM_1283_GCF_900115365.1__r31c1__ctg31_12	Anaerocolumna_aminovalerica_DSM_1283_GCF_900115365.1__r31c1__ctg31_13		GCF_900115365.1/NZ_FOWD01000018.region001_10 # 9521 # 9664 # -1 # ID=14721_10;partial=00;start_type=ATG;rbs_motif=GGA/GAG/AGG;rbs_spacer=5-10bp;gc_cont=0.347	Y
Anaerocolumna_aminovalerica_DSM_1283_GCF_900115365.1	Firmicutes	Clostridia	Eubacteriales	Lachnospiraceae	Anaerocolumna	r31c2	cyclic-lactone-autoinducer	NZ_FOWD01000018.region002.gbk	54561	75273	20713	17	54560	75273	Anaerocolumna_aminovalerica_DSM_1283_GCF_900115365.1__r31c2__ctg31_54	Anaerocolumna_aminovalerica_DSM_1283_GCF_900115365.1__r31c2__ctg31_53		GCF_900115365.1/NZ_FOWD01000018.region002_8 # 10001 # 10138 # -1 # ID=14722_8;partial=00;start_type=ATG;rbs_motif=AGGAG;rbs_spacer=5-10bp;gc_cont=0.391	Y
Anaerocolumna_aminovalerica_DSM_1283_GCF_900115365.1	Firmicutes	Clostridia	Eubacteriales	Lachnospiraceae	Anaerocolumna	r37c1	cyclic-lactone-autoinducer	NZ_FOWD01000012.region001.gbk	80340	100498	20159	19	80339	100498	Anaerocolumna_aminovalerica_DSM_1283_GCF_900115365.1__r37c1__ctg37_82				N
Anaerocolumna_aminovalerica_N98_GCF_018917405.1	Firmicutes	Clostridia	Eubacteriales	Lachnospiraceae	Anaerocolumna	r43c1	cyclic-lactone-autoinducer	c00043_NZ_JAHL...region001.gbk	1	20517	20517	16	0	20517	Anaerocolumna_aminovalerica_N98_GCF_018917405.1__r43c1__ctg43_9	Anaerocolumna_aminovalerica_N98_GCF_018917405.1__r43c1__ctg43_10		GCF_018917405.1/c00043_NZ_JAHL...region001_10 # 10380 # 10517 # 1 # ID=18946_10;partial=00;start_type=ATG;rbs_motif=AGGAG;rbs_spacer=5-10bp;gc_cont=0.384	Y
Anaerocolumna_aminovalerica_N98_GCF_018917405.1	Firmicutes	Clostridia	Eubacteriales	Lachnospiraceae	Anaerocolumna	r74c1	cyclic-lactone-autoinducer	c00074_NZ_JAHL...region001.gbk	9154	22859	13706	13	9153	22859	Anaerocolumna_aminovalerica_N98_GCF_018917405.1__r74c1__ctg74_20	Anaerocolumna_aminovalerica_N98_GCF_018917405.1__r74c1__ctg74_19		GCF_018917405.1/c00074_NZ_JAHL...region001_10 # 10001 # 10144 # 1 # ID=18947_10;partial=00;start_type=ATG;rbs_motif=GGA/GAG/AGG;rbs_spacer=5-10bp;gc_cont=0.354	Y
Anaerocolumna_aminovalerica_src1_GCF_900205915.1	Firmicutes	Clostridia	Eubacteriales	Lachnospiraceae	Anaerocolumna	r68c1	cyclic-lactone-autoinducer	NZ_OAOG01000020.region001.gbk	12418	31574	19157	17	12417	31574	Anaerocolumna_aminovalerica_src1_GCF_900205915.1__r68c1__ctg68_17	Anaerocolumna_aminovalerica_src1_GCF_900205915.1__r68c1__ctg68_18		GCF_900205915.1/NZ_OAOG01000020.region001_10 # 9700 # 9837 # 1 # ID=19427_10;partial=00;start_type=ATG;rbs_motif=AGGAG;rbs_spacer=5-10bp;gc_cont=0.384	Y
Anaerocolumna_aminovalerica_src1_GCF_900205915.1	Firmicutes	Clostridia	Eubacteriales	Lachnospiraceae	Anaerocolumna	r68c2	cyclic-lactone-autoinducer	NZ_OAOG01000020.region002.gbk	63298	84010	20713	18	63297	84010	Anaerocolumna_aminovalerica_src1_GCF_900205915.1__r68c2__ctg68_61	Anaerocolumna_aminovalerica_src1_GCF_900205915.1__r68c2__ctg68_60		GCF_900205915.1/NZ_OAOG01000020.region002_9 # 10001 # 10144 # 1 # ID=19428_9;partial=00;start_type=ATG;rbs_motif=GGA/GAG/AGG;rbs_spacer=5-10bp;gc_cont=0.354	Y
Anaerocolumna_cellulosilytica_DSM_100423_GCF_014202875.1	Firmicutes	Clostridia	Eubacteriales	Lachnospiraceae	Anaerocolumna	r11c1	cyclic-lactone-autoinducer	c00011_NZ_JACH...region001.gbk	137009	157767	20759	15	137008	157767	Anaerocolumna_cellulosilytica_DSM_100423_GCF_014202875.1__r11c1__ctg11_120	Anaerocolumna_cellulosilytica_DSM_100423_GCF_014202875.1__r11c1__ctg11_119		GCF_014202875.1/c00011_NZ_JACH...region001_6 # 10001 # 10150 # -1 # ID=19747_6;partial=00;start_type=ATG;rbs_motif=AGGAG;rbs_spacer=5-10bp;gc_cont=0.373	Y
Anaerocolumna_cellulosilytica_DSM_100423_GCF_014202875.1	Firmicutes	Clostridia	Eubacteriales	Lachnospiraceae	Anaerocolumna	r22c1	cyclic-lactone-autoinducer	c00022_NZ_JACH...region001.gbk	27963	49050	21088	19	27962	49050	Anaerocolumna_cellulosilytica_DSM_100423_GCF_014202875.1__r22c1__ctg22_33	Anaerocolumna_cellulosilytica_DSM_100423_GCF_014202875.1__r22c1__ctg22_31		GCF_014202875.1/c00022_NZ_JACH...region001_9 # 10001 # 10147 # -1 # ID=19748_9;partial=00;start_type=ATG;rbs_motif=AGGAG;rbs_spacer=5-10bp;gc_cont=0.333	Y
Anaerocolumna_cellulosilytica_DSM_100423_GCF_014202875.1	Firmicutes	Clostridia	Eubacteriales	Lachnospiraceae	Anaerocolumna	r3c1	cyclic-lactone-autoinducer	c00003_NZ_JACH...region001.gbk	9023	29619	20597	15	9022	29619	Anaerocolumna_cellulosilytica_DSM_100423_GCF_014202875.1__r3c1__ctg3_20				N
Anaerocolumna_cellulosilytica_SN021_GCF_014218335.1	Firmicutes	Clostridia	Eubacteriales	Lachnospiraceae	Anaerocolumna	r1c1	cyclic-lactone-autoinducer	NZ_AP023367.1.region001.gbk	30064	48961	18898	15	30063	48961	Anaerocolumna_cellulosilytica_SN021_GCF_014218335.1__r1c1__ctg1_25	Anaerocolumna_cellulosilytica_SN021_GCF_014218335.1__r1c1__ctg1_26		GCF_014218335.1/NZ_AP023367.1.region001_10 # 9748 # 9897 # 1 # ID=20365_10;partial=00;start_type=ATG;rbs_motif=AGGAG;rbs_spacer=5-10bp;gc_cont=0.380	Y
Anaerocolumna_cellulosilytica_SN021_GCF_014218335.1	Firmicutes	Clostridia	Eubacteriales	Lachnospiraceae	Anaerocolumna	r1c10	cyclic-lactone-autoinducer	NZ_AP023367.1.region010.gbk	3649993	3671080	21088	20	3649992	3671080	Anaerocolumna_cellulosilytica_SN021_GCF_014218335.1__r1c10__ctg1_3012	Anaerocolumna_cellulosilytica_SN021_GCF_014218335.1__r1c10__ctg1_3010		GCF_014218335.1/NZ_AP023367.1.region010_9 # 10001 # 10147 # -1 # ID=20366_9;partial=00;start_type=ATG;rbs_motif=AGGAG;rbs_spacer=5-10bp;gc_cont=0.333	Y
Anaerocolumna_cellulosilytica_SN021_GCF_014218335.1	Firmicutes	Clostridia	Eubacteriales	Lachnospiraceae	Anaerocolumna	r1c2	cyclic-lactone-autoinducer	NZ_AP023367.1.region002.gbk	145873	165091	19219	16	145872	165091		Anaerocolumna_cellulosilytica_SN021_GCF_014218335.1__r1c2__ctg1_119			Y
Anaerocolumna_cellulosilytica_SN021_GCF_014218335.1	Firmicutes	Clostridia	Eubacteriales	Lachnospiraceae	Anaerocolumna	r1c8	cyclic-lactone-autoinducer	NZ_AP023367.1.region008.gbk	2331568	2350137	18570	15	2331567	2350137	Anaerocolumna_cellulosilytica_SN021_GCF_014218335.1__r1c8__ctg1_1927				N
Anaerocolumna_jejuensis_DSM_15929_GCF_900142215.1	Firmicutes	Clostridia	Eubacteriales	Lachnospiraceae	Anaerocolumna	r18c1	cyclic-lactone-autoinducer	NZ_FRAC01000022.region001.gbk	42187	67026	24840	25	42186	67026	Anaerocolumna_jejuensis_DSM_15929_GCF_900142215.1__r18c1__ctg18_60	Anaerocolumna_jejuensis_DSM_15929_GCF_900142215.1__r18c1__ctg18_55		GCF_900142215.1/NZ_FRAC01000022.region001_8 # 10001 # 10147 # 1 # ID=20860_8;partial=00;start_type=ATG;rbs_motif=AGGA;rbs_spacer=5-10bp;gc_cont=0.327	Y
Anaerocolumna_jejuensis_DSM_15929_GCF_900142215.1	Firmicutes	Clostridia	Eubacteriales	Lachnospiraceae	Anaerocolumna	r37c1	cyclic-lactone-autoinducer	NZ_FRAC01000008.region001.gbk	319019	339956	20938	23	319018	339956	Anaerocolumna_jejuensis_DSM_15929_GCF_900142215.1__r37c1__ctg37_291	Anaerocolumna_jejuensis_DSM_15929_GCF_900142215.1__r37c1__ctg37_290		GCF_900142215.1/NZ_FRAC01000008.region001_12 # 10001 # 10147 # -1 # ID=20861_12;partial=00;start_type=ATG;rbs_motif=AGGAGG;rbs_spacer=5-10bp;gc_cont=0.340	Y
Anaerocolumna_sedimenticola_CBA3638_GCF_009931695.1	Firmicutes	Clostridia	Eubacteriales	Lachnospiraceae	Anaerocolumna	r1c1	cyclic-lactone-autoinducer	NZ_CP048000.1.region001.gbk	1161856	1181942	20087	19	1161855	1181942	Anaerocolumna_sedimenticola_CBA3638_GCF_009931695.1__r1c1__ctg1_1044	Anaerocolumna_sedimenticola_CBA3638_GCF_009931695.1__r1c1__ctg1_1043		GCF_009931695.1/NZ_CP048000.1.region001_11 # 9514 # 9663 # -1 # ID=20862_11;partial=00;start_type=ATG;rbs_motif=AGGAG;rbs_spacer=5-10bp;gc_cont=0.380	Y
Anaerocolumna_sedimenticola_CBA3638_GCF_009931695.1	Firmicutes	Clostridia	Eubacteriales	Lachnospiraceae	Anaerocolumna	r1c4	cyclic-lactone-autoinducer	NZ_CP048000.1.region004.gbk	4111021	4131895	20875	19	4111020	4131895	Anaerocolumna_sedimenticola_CBA3638_GCF_009931695.1__r1c4__ctg1_3729	Anaerocolumna_sedimenticola_CBA3638_GCF_009931695.1__r1c4__ctg1_3728		GCF_009931695.1/NZ_CP048000.1.region004_9 # 10001 # 10147 # -1 # ID=20863_9;partial=00;start_type=ATG;rbs_motif=GGAG/GAGG;rbs_spacer=5-10bp;gc_cont=0.306	Y
Anaerocolumna_sp._CTTW_GCF_014218355.1	Firmicutes	Clostridia	Eubacteriales	Lachnospiraceae	Anaerocolumna	r1c5	cyclic-lactone-autoinducer	NZ_AP023368.1.region005.gbk	3821219	3842135	20917	19	3821218	3842135	Anaerocolumna_sp._CTTW_GCF_014218355.1__r1c5__ctg1_3296	Anaerocolumna_sp._CTTW_GCF_014218355.1__r1c5__ctg1_3295		GCF_014218355.1/NZ_AP023368.1.region005_9 # 10001 # 10147 # -1 # ID=22010_9;partial=00;start_type=GTG;rbs_motif=AGGAGG;rbs_spacer=5-10bp;gc_cont=0.361	Y
Anaerocolumna_xylanovorans_DSM_12503_GCF_900143645.1	Firmicutes	Clostridia	Eubacteriales	Lachnospiraceae	Anaerocolumna	r15c1	NRPS,T1PKS,cyclic-lactone-autoinducer	NZ_FRFD01000011.region001.gbk	1	86452	86452	57	22734	43483	Anaerocolumna_xylanovorans_DSM_12503_GCF_900143645.1__r15c1__ctg15_24	Anaerocolumna_xylanovorans_DSM_12503_GCF_900143645.1__r15c1__ctg15_25		GCF_900143645.1/NZ_FRFD01000011.region001_25 # 33334 # 33528 # -1 # ID=22026_25;partial=00;start_type=TTG;rbs_motif=GGxGG;rbs_spacer=5-10bp;gc_cont=0.282	Y
Anaerocolumna_xylanovorans_DSM_12503_GCF_900143645.1	Firmicutes	Clostridia	Eubacteriales	Lachnospiraceae	Anaerocolumna	r17c1	cyclic-lactone-autoinducer	NZ_FRFD01000018.region001.gbk	40543	59427	18885	17	40542	59427	Anaerocolumna_xylanovorans_DSM_12503_GCF_900143645.1__r17c1__ctg17_55				N
Anaerocolumna_xylanovorans_DSM_12503_GCF_900143645.1	Firmicutes	Clostridia	Eubacteriales	Lachnospiraceae	Anaerocolumna	r4c1	cyclic-lactone-autoinducer	NZ_FRFD01000007.region001.gbk	270106	290974	20869	19	270105	290974	Anaerocolumna_xylanovorans_DSM_12503_GCF_900143645.1__r4c1__ctg4_287	Anaerocolumna_xylanovorans_DSM_12503_GCF_900143645.1__r4c1__ctg4_286		GCF_900143645.1/NZ_FRFD01000007.region001_9 # 10001 # 10147 # -1 # ID=22027_9;partial=00;start_type=ATG;rbs_motif=AGGAGG;rbs_spacer=5-10bp;gc_cont=0.340	Y
Anaerolactibacter_massiliensis_Marseille-P4302_GCF_900290205.1	Firmicutes	Erysipelotrichia	Erysipelotrichales	Erysipelotrichaceae	Anaerolactibacter	r2c2	cyclic-lactone-autoinducer	NZ_OLMH01000002.region002.gbk	2129037	2149606	20570	18	2129036	2149606	Anaerolactibacter_massiliensis_Marseille-P4302_GCF_900290205.1__r2c2__ctg2_2010				N
Anaerolactibacter_massiliensis_Marseille-P4302_GCF_900290205.1	Firmicutes	Erysipelotrichia	Erysipelotrichales	Erysipelotrichaceae	Anaerolactibacter	r3c1	cyclic-lactone-autoinducer	NZ_OLMH01000001.region001.gbk	271008	289899	18892	18	271007	289899	Anaerolactibacter_massiliensis_Marseille-P4302_GCF_900290205.1__r3c1__ctg3_276				N
Anaerolactibacter_massiliensis_Marseille-P4302_GCF_900290205.1	Firmicutes	Erysipelotrichia	Erysipelotrichales	Erysipelotrichaceae	Anaerolactibacter	r3c2	RiPP-like,cyclic-lactone-autoinducer	NZ_OLMH01000001.region002.gbk	500395	531007	30613	32	500394	520973	Anaerolactibacter_massiliensis_Marseille-P4302_GCF_900290205.1__r3c2__ctg3_517				N
Anaeromassilibacillus_sp._An172_GCF_002160515.1	Firmicutes	Clostridia	Eubacteriales	Oscillospiraceae	Anaeromassilibacillus	r12c1	cyclic-lactone-autoinducer	NZ_NFKS01000002.region001.gbk	168348	180807	12460	13	168347	180807	Anaeromassilibacillus_sp._An172_GCF_002160515.1__r12c1__ctg12_186	Anaeromassilibacillus_sp._An172_GCF_002160515.1__r12c1__ctg12_185		GCF_002160515.1/NZ_NFKS01000002.region001_12 # 10001 # 10147 # 1 # ID=22519_12;partial=00;start_type=ATG;rbs_motif=GGAG/GAGG;rbs_spacer=5-10bp;gc_cont=0.347	Y
Anaeromassilibacillus_sp._An172_GCF_002160515.1	Firmicutes	Clostridia	Eubacteriales	Oscillospiraceae	Anaeromassilibacillus	r25c1	cyclic-lactone-autoinducer	NZ_NFKS01000031.region001.gbk	1	17045	17045	14	0	17045	Anaeromassilibacillus_sp._An172_GCF_002160515.1__r25c1__ctg25_6	Anaeromassilibacillus_sp._An172_GCF_002160515.1__r25c1__ctg25_7		GCF_002160515.1/NZ_NFKS01000031.region001_7 # 6893 # 7045 # 1 # ID=22520_7;partial=00;start_type=ATG;rbs_motif=AGGAG;rbs_spacer=5-10bp;gc_cont=0.294	Y
Anaeromassilibacillus_sp._An200_GCF_002160025.1	Firmicutes	Clostridia	Eubacteriales	Oscillospiraceae	Anaeromassilibacillus	r38c1	cyclic-lactone-autoinducer	NZ_NFJU01000018.region001.gbk	62420	73883	11464	8	62419	73883	Anaeromassilibacillus_sp._An200_GCF_002160025.1__r38c1__ctg38_74			GCF_002160025.1/NZ_NFJU01000018.region001_11 # 10581 # 10700 # 1 # ID=22936_11;partial=00;start_type=ATG;rbs_motif=GGAGG;rbs_spacer=5-10bp;gc_cont=0.408	Y
Anaeromicrobium_sediminis_DY2726D_GCF_002270055.1	Firmicutes	Clostridia	Eubacteriales	Clostridiaceae	Anaeromicrobium	r10c1	cyclic-lactone-autoinducer	NZ_NIBG01000018.region001.gbk	31927	52692	20766	20	31926	52692	Anaeromicrobium_sediminis_DY2726D_GCF_002270055.1__r10c1__ctg10_61	Anaeromicrobium_sediminis_DY2726D_GCF_002270055.1__r10c1__ctg10_62		GCF_002270055.1/NZ_NIBG01000018.region001_14 # 10629 # 10766 # 1 # ID=23399_14;partial=00;start_type=ATG;rbs_motif=GGAG/GAGG;rbs_spacer=5-10bp;gc_cont=0.348	Y
Anaerophilus_nitritogenes_MJB2_GCF_004138215.1	Firmicutes	Clostridia	Eubacteriales	Clostridiaceae	Anaerophilus	r102c1	cyclic-lactone-autoinducer	NZ_RYYS01000009.region001.gbk	109695	127102	17408	19	109694	127102	Anaerophilus_nitritogenes_MJB2_GCF_004138215.1__r102c1__ctg102_114	Anaerophilus_nitritogenes_MJB2_GCF_004138215.1__r102c1__ctg102_115		GCF_004138215.1/NZ_RYYS01000009.region001_12 # 10772 # 10897 # 1 # ID=23856_12;partial=00;start_type=ATG;rbs_motif=GGA/GAG/AGG;rbs_spacer=5-10bp;gc_cont=0.317	Y
Anaerophilus_nitritogenes_MJB2_GCF_004138215.1	Firmicutes	Clostridia	Eubacteriales	Clostridiaceae	Anaerophilus	r7c1	cyclic-lactone-autoinducer	NZ_RYYS01000103.region001.gbk	75635	86219	10585	12	75634	86219	Anaerophilus_nitritogenes_MJB2_GCF_004138215.1__r7c1__ctg7_72				N
Anaerophilus_nitritogenes_MJB2_GCF_004138215.1	Firmicutes	Clostridia	Eubacteriales	Clostridiaceae	Anaerophilus	r83c1	cyclic-lactone-autoinducer	NZ_RYYS01000071.region001.gbk	4140	26422	22283	22	4139	26422	Anaerophilus_nitritogenes_MJB2_GCF_004138215.1__r83c1__ctg83_16	Anaerophilus_nitritogenes_MJB2_GCF_004138215.1__r83c1__ctg83_14		GCF_004138215.1/NZ_RYYS01000071.region001_10 # 10001 # 10144 # 1 # ID=23857_10;partial=00;start_type=ATG;rbs_motif=GGAG/GAGG;rbs_spacer=5-10bp;gc_cont=0.340	Y
Anaerorhabdus_furcosa_ATCC_25662_GCF_900167375.1	Firmicutes	Erysipelotrichia	Erysipelotrichales	Erysipelotrichaceae	Anaerorhabdus	r10c1	cyclic-lactone-autoinducer	NZ_FUWY01000008.region001.gbk	50094	76743	26650	35	50093	76743	Anaerorhabdus_furcosa_ATCC_25662_GCF_900167375.1__r10c1__ctg10_73	Anaerorhabdus_furcosa_ATCC_25662_GCF_900167375.1__r10c1__ctg10_67			Y
Anaerorhabdus_furcosa_ATCC_25662_GCF_900167375.1	Firmicutes	Erysipelotrichia	Erysipelotrichales	Erysipelotrichaceae	Anaerorhabdus	r2c1	cyclic-lactone-autoinducer	NZ_FUWY01000001.region001.gbk	46458	66829	20372	23	46457	66829	Anaerorhabdus_furcosa_ATCC_25662_GCF_900167375.1__r2c1__ctg2_54				N
Anaerorhabdus_furcosa_ATCC_25662_GCF_900167375.1	Firmicutes	Erysipelotrichia	Erysipelotrichales	Erysipelotrichaceae	Anaerorhabdus	r5c1	cyclic-lactone-autoinducer	NZ_FUWY01000006.region001.gbk	14185	27891	13707	18	14184	27891	Anaerorhabdus_furcosa_ATCC_25662_GCF_900167375.1__r5c1__ctg5_26				N
Anaerorhabdus_furcosa_ATCC_25662_GCF_900167375.1	Firmicutes	Erysipelotrichia	Erysipelotrichales	Erysipelotrichaceae	Anaerorhabdus	r5c2	cyclic-lactone-autoinducer	NZ_FUWY01000006.region002.gbk	165784	176160	10377	14	165783	176160	Anaerorhabdus_furcosa_ATCC_25662_GCF_900167375.1__r5c2__ctg5_158				N
Anaerorhabdus_furcosa_ATCC_25662_GCF_900167375.1	Firmicutes	Erysipelotrichia	Erysipelotrichales	Erysipelotrichaceae	Anaerorhabdus	r7c1	cyclic-lactone-autoinducer	NZ_FUWY01000003.region001.gbk	67378	87926	20549	19	67377	87926	Anaerorhabdus_furcosa_ATCC_25662_GCF_900167375.1__r7c1__ctg7_75				N
Anaerosacchariphilus_polymeriproducens_MCWD5_GCF_003363435.1	Firmicutes	Clostridia	Eubacteriales	Lachnospiraceae	Anaerosacchariphilus	r12c1	cyclic-lactone-autoinducer	NZ_QRCT01000012.region001.gbk	44124	63339	19216	21	44123	63339	Anaerosacchariphilus_polymeriproducens_MCWD5_GCF_003363435.1__r12c1__ctg12_55	Anaerosacchariphilus_polymeriproducens_MCWD5_GCF_003363435.1__r12c1__ctg12_54		GCF_003363435.1/NZ_QRCT01000012.region001_11 # 9645 # 9791 # 1 # ID=24924_11;partial=00;start_type=ATG;rbs_motif=AGxAGG/AGGxGG;rbs_spacer=5-10bp;gc_cont=0.327	Y
Anaerosacchariphilus_polymeriproducens_MCWD5_GCF_003363435.1	Firmicutes	Clostridia	Eubacteriales	Lachnospiraceae	Anaerosacchariphilus	r12c2	NRPS,cyclic-lactone-autoinducer,lanthipeptide-class-ii	NZ_QRCT01000012.region002.gbk	226869	293837	66969	53	226868	247441	Anaerosacchariphilus_polymeriproducens_MCWD5_GCF_003363435.1__r12c2__ctg12_243				N
Anaerosacchariphilus_polymeriproducens_MCWD5_GCF_003363435.1	Firmicutes	Clostridia	Eubacteriales	Lachnospiraceae	Anaerosacchariphilus	r9c1	cyclic-lactone-autoinducer	NZ_QRCT01000009.region001.gbk	289	20092	19804	17	288	20092		Anaerosacchariphilus_polymeriproducens_MCWD5_GCF_003363435.1__r9c1__ctg9_7			Y
Anaerosacchariphilus_polymeriproducens_MCWD5_GCF_003363435.1	Firmicutes	Clostridia	Eubacteriales	Lachnospiraceae	Anaerosacchariphilus	r9c3	cyclic-lactone-autoinducer	NZ_QRCT01000009.region003.gbk	79019	101872	22854	30	79018	101872	Anaerosacchariphilus_polymeriproducens_MCWD5_GCF_003363435.1__r9c3__ctg9_88	Anaerosacchariphilus_polymeriproducens_MCWD5_GCF_003363435.1__r9c3__ctg9_84			Y
Anaerosalibacter_bizertensis_Med78-601-WT-4W-RMD-3_GCF_009696605.1	Firmicutes	Tissierellia	Tissierellales	Tissierellaceae	Anaerosalibacter	r1c1	cyclic-lactone-autoinducer	NZ_VULR01000001.region001.gbk	272623	293375	20753	22	272622	293375	Anaerosalibacter_bizertensis_Med78-601-WT-4W-RMD-3_GCF_009696605.1__r1c1__ctg1_289	Anaerosalibacter_bizertensis_Med78-601-WT-4W-RMD-3_GCF_009696605.1__r1c1__ctg1_288		GCF_009696605.1/NZ_VULR01000001.region001_12 # 10001 # 10120 # -1 # ID=25462_12;partial=00;start_type=ATG;rbs_motif=AGGAG;rbs_spacer=5-10bp;gc_cont=0.342	Y
Anaerosalibacter_bizertensis_N103_GCF_018917195.1	Firmicutes	Tissierellia	Tissierellales	Tissierellaceae	Anaerosalibacter	r6c1	cyclic-lactone-autoinducer	c00006_NZ_JAHL...region001.gbk	29405	50157	20753	22	29404	50157	Anaerosalibacter_bizertensis_N103_GCF_018917195.1__r6c1__ctg6_33	Anaerosalibacter_bizertensis_N103_GCF_018917195.1__r6c1__ctg6_34		GCF_018917195.1/c00006_NZ_JAHL...region001_12 # 10634 # 10753 # 1 # ID=25961_12;partial=00;start_type=ATG;rbs_motif=GGAG/GAGG;rbs_spacer=5-10bp;gc_cont=0.342	Y
Anaerosalibacter_massiliensis_MGYG-HGUT-01473_GCF_902375335.1	Firmicutes	Tissierellia	Tissierellales	Tissierellaceae	Anaerosalibacter	r30c1	cyclic-lactone-autoinducer	c00030_NZ_CABK...region001.gbk	15469	36221	20753	22	15468	36221	Anaerosalibacter_massiliensis_MGYG-HGUT-01473_GCF_902375335.1__r30c1__ctg30_27	Anaerosalibacter_massiliensis_MGYG-HGUT-01473_GCF_902375335.1__r30c1__ctg30_26		GCF_902375335.1/c00030_NZ_CABK...region001_12 # 10001 # 10120 # -1 # ID=26180_12;partial=00;start_type=ATG;rbs_motif=GGAG/GAGG;rbs_spacer=5-10bp;gc_cont=0.317	Y
Anaerosalibacter_massiliensis_MGYG-HGUT-01473_GCF_902375335.1	Firmicutes	Tissierellia	Tissierellales	Tissierellaceae	Anaerosalibacter	r4c1	cyclic-lactone-autoinducer,ranthipeptide	c00004_NZ_CABK...region001.gbk	12576	37641	25066	22	17050	37641	Anaerosalibacter_massiliensis_MGYG-HGUT-01473_GCF_902375335.1__r4c1__ctg4_26				N
Anaerosolibacter_carboniphilus_DSM_103526_GCF_014205875.1	Firmicutes	Clostridia	Eubacteriales	Clostridiaceae	Anaerosolibacter	r20c2	cyclic-lactone-autoinducer	c00020_NZ_JACH...region002.gbk	64745	86997	22253	25	64744	86997	Anaerosolibacter_carboniphilus_DSM_103526_GCF_014205875.1__r20c2__ctg20_88	Anaerosolibacter_carboniphilus_DSM_103526_GCF_014205875.1__r20c2__ctg20_90			Y
Anaerosolibacter_carboniphilus_DSM_103526_GCF_014205875.1	Firmicutes	Clostridia	Eubacteriales	Clostridiaceae	Anaerosolibacter	r38c1	cyclic-lactone-autoinducer	c00038_NZ_JACH...region001.gbk	35918	52915	16998	18	35917	52915	Anaerosolibacter_carboniphilus_DSM_103526_GCF_014205875.1__r38c1__ctg38_36	Anaerosolibacter_carboniphilus_DSM_103526_GCF_014205875.1__r38c1__ctg38_37		GCF_014205875.1/c00038_NZ_JACH...region001_9 # 10636 # 10761 # 1 # ID=27085_9;partial=00;start_type=ATG;rbs_motif=AGGAGG;rbs_spacer=5-10bp;gc_cont=0.357	Y
Anaerosolibacter_carboniphilus_DSM_103526_GCF_014205875.1	Firmicutes	Clostridia	Eubacteriales	Clostridiaceae	Anaerosolibacter	r4c2	cyclic-lactone-autoinducer	c00004_NZ_JACH...region002.gbk	153196	174612	21417	25	153195	174612	Anaerosolibacter_carboniphilus_DSM_103526_GCF_014205875.1__r4c2__ctg4_174	Anaerosolibacter_carboniphilus_DSM_103526_GCF_014205875.1__r4c2__ctg4_176		GCF_014205875.1/c00004_NZ_JACH...region002_12 # 11271 # 11417 # -1 # ID=27086_12;partial=00;start_type=ATG;rbs_motif=GGAG/GAGG;rbs_spacer=5-10bp;gc_cont=0.333	Y
Anaerosolibacter_carboniphilus_DSM_103526_GCF_014205875.1	Firmicutes	Clostridia	Eubacteriales	Clostridiaceae	Anaerosolibacter	r8c1	cyclic-lactone-autoinducer	c00008_NZ_JACH...region001.gbk	1	19998	19998	13	0	19998	Anaerosolibacter_carboniphilus_DSM_103526_GCF_014205875.1__r8c1__ctg8_8	Anaerosolibacter_carboniphilus_DSM_103526_GCF_014205875.1__r8c1__ctg8_9		GCF_014205875.1/c00008_NZ_JACH...region001_8 # 9861 # 9998 # 1 # ID=27087_8;partial=00;start_type=ATG;rbs_motif=GGAG/GAGG;rbs_spacer=5-10bp;gc_cont=0.391	Y
Anaerosporobacter_mobilis_DSM_15930_GCF_900142955.1	Firmicutes	Clostridia	Eubacteriales	Lachnospiraceae	Anaerosporobacter	r29c1	cyclic-lactone-autoinducer	NZ_FRCP01000012.region001.gbk	66328	86924	20597	20	66327	86924	Anaerosporobacter_mobilis_DSM_15930_GCF_900142955.1__r29c1__ctg29_70			GCF_900142955.1/NZ_FRCP01000012.region001_14 # 10626 # 10796 # 1 # ID=27552_14;partial=00;start_type=ATG;rbs_motif=GGAG/GAGG;rbs_spacer=5-10bp;gc_cont=0.327	Y
Anaerosporobacter_mobilis_DSM_15930_GCF_900142955.1	Firmicutes	Clostridia	Eubacteriales	Lachnospiraceae	Anaerosporobacter	r33c1	cyclic-lactone-autoinducer	NZ_FRCP01000015.region001.gbk	65060	85771	20712	15	65059	85771	Anaerosporobacter_mobilis_DSM_15930_GCF_900142955.1__r33c1__ctg33_69	Anaerosporobacter_mobilis_DSM_15930_GCF_900142955.1__r33c1__ctg33_68		GCF_900142955.1/NZ_FRCP01000015.region001_6 # 10001 # 10129 # -1 # ID=27553_6;partial=00;start_type=ATG;rbs_motif=AGGAG;rbs_spacer=5-10bp;gc_cont=0.326	Y
Anaerosporobacter_sp._KCTC_15857_GCF_012070565.1	Firmicutes	Clostridia	Eubacteriales	Lachnospiraceae	Anaerosporobacter	r41c1	cyclic-lactone-autoinducer	c00041_NZ_JAAQ...region001.gbk	50144	70951	20808	19	50143	70951	Anaerosporobacter_sp._KCTC_15857_GCF_012070565.1__r41c1__ctg41_57	Anaerosporobacter_sp._KCTC_15857_GCF_012070565.1__r41c1__ctg41_58		GCF_012070565.1/c00041_NZ_JAAQ...region001_12 # 10650 # 10808 # -1 # ID=27829_12;partial=00;start_type=ATG;rbs_motif=None;rbs_spacer=None;gc_cont=0.321	Y
Anaerosporobacter_sp._KCTC_15857_GCF_012070565.1	Firmicutes	Clostridia	Eubacteriales	Lachnospiraceae	Anaerosporobacter	r46c1	cyclic-lactone-autoinducer	c00046_NZ_JAAQ...region001.gbk	1	12564	12564	11	0	12564	Anaerosporobacter_sp._KCTC_15857_GCF_012070565.1__r46c1__ctg46_3	Anaerosporobacter_sp._KCTC_15857_GCF_012070565.1__r46c1__ctg46_2		GCF_012070565.1/c00046_NZ_JAAQ...region001_2 # 1853 # 1981 # -1 # ID=27830_2;partial=00;start_type=ATG;rbs_motif=AGGAG;rbs_spacer=5-10bp;gc_cont=0.333	Y
Anaerostipes_butyraticus_JCM_17466_GCF_016586355.1	Firmicutes	Clostridia	Eubacteriales	Lachnospiraceae	Anaerostipes	r15c1	cyclic-lactone-autoinducer	NZ_BLYI01000027.region001.gbk	169324	190023	20700	21	169323	190023	Anaerostipes_butyraticus_JCM_17466_GCF_016586355.1__r15c1__ctg15_172	Anaerostipes_butyraticus_JCM_17466_GCF_016586355.1__r15c1__ctg15_173		GCF_016586355.1/NZ_BLYI01000027.region001_12 # 10584 # 10700 # 1 # ID=28337_12;partial=00;start_type=ATG;rbs_motif=AGGAGG;rbs_spacer=5-10bp;gc_cont=0.308	Y
Anaerostipes_caccae_L1-92__81B4_GCF_900624715.1	Firmicutes	Clostridia	Eubacteriales	Lachnospiraceae	Anaerostipes	r20c1	NRPS,NRPS-like,cyclic-lactone-autoinducer	NZ_UYXC01000020.region001.gbk	1	46841	46841	27	19966	40709	Anaerostipes_caccae_L1-92__81B4_GCF_900624715.1__r20c1__ctg20_19	Anaerostipes_caccae_L1-92__81B4_GCF_900624715.1__r20c1__ctg20_20		GCF_900624715.1/NZ_UYXC01000020.region001_20 # 30551 # 30709 # -1 # ID=28762_20;partial=00;start_type=ATG;rbs_motif=AGGAGG;rbs_spacer=5-10bp;gc_cont=0.421	Y
Anaerostipes_hadrus_MCC003_GCF_018786165.1	Firmicutes	Clostridia	Eubacteriales	Lachnospiraceae	Anaerostipes	r2c2	NRPS,cyclic-lactone-autoinducer	NZ_WQRC01000008.region002.gbk	130436	183590	53155	37	136567	157310	Anaerostipes_hadrus_MCC003_GCF_018786165.1__r2c2__ctg2_125	Anaerostipes_hadrus_MCC003_GCF_018786165.1__r2c2__ctg2_124		GCF_018786165.1/NZ_WQRC01000008.region002_9 # 16133 # 16291 # 1 # ID=29067_9;partial=00;start_type=ATG;rbs_motif=AGGAGG;rbs_spacer=5-10bp;gc_cont=0.415	Y
Anaerostipes_hadrus_MSK.14.29_GCF_013302565.1	Firmicutes	Clostridia	Eubacteriales	Lachnospiraceae	Anaerostipes	r29c1	cyclic-lactone-autoinducer,lanthipeptide-class-ii	c00029_NZ_JAAI...region001.gbk	20611	43612	23002	24	29429	43612	Anaerostipes_hadrus_MSK.14.29_GCF_013302565.1__r29c1__ctg29_27	Anaerostipes_hadrus_MSK.14.29_GCF_013302565.1__r29c1__ctg29_26		GCF_013302565.1/c00029_NZ_JAAI...region001_18 # 18820 # 18969 # 1 # ID=29526_18;partial=00;start_type=ATG;rbs_motif=AGGAG;rbs_spacer=5-10bp;gc_cont=0.380	Y
Anaerostipes_hadrus_MSK.14.4_GCF_013302555.1	Firmicutes	Clostridia	Eubacteriales	Lachnospiraceae	Anaerostipes	r65c1	cyclic-lactone-autoinducer	c00065_NZ_JAAI...region001.gbk	1	6346	6346	9	0	6346	Anaerostipes_hadrus_MSK.14.4_GCF_013302555.1__r65c1__ctg65_2	Anaerostipes_hadrus_MSK.14.4_GCF_013302555.1__r65c1__ctg65_1		GCF_013302555.1/c00065_NZ_JAAI...region001_1 # 116 # 265 # 1 # ID=30090_1;partial=00;start_type=ATG;rbs_motif=AGGAG;rbs_spacer=5-10bp;gc_cont=0.380	Y
Anaerostipes_hadrus_MSK.14.57_GCF_013304555.1	Firmicutes	Clostridia	Eubacteriales	Lachnospiraceae	Anaerostipes	r30c1	cyclic-lactone-autoinducer,lanthipeptide-class-ii	c00030_NZ_JAAI...region001.gbk	20611	43612	23002	24	29429	43612	Anaerostipes_hadrus_MSK.14.57_GCF_013304555.1__r30c1__ctg30_27	Anaerostipes_hadrus_MSK.14.57_GCF_013304555.1__r30c1__ctg30_26		GCF_013304555.1/c00030_NZ_JAAI...region001_18 # 18820 # 18969 # 1 # ID=30625_18;partial=00;start_type=ATG;rbs_motif=AGGAG;rbs_spacer=5-10bp;gc_cont=0.380	Y
Anaerostipes_hadrus_MSK.14.9_GCF_013302545.1	Firmicutes	Clostridia	Eubacteriales	Lachnospiraceae	Anaerostipes	r86c1	cyclic-lactone-autoinducer,lanthipeptide-class-ii	c00086_NZ_JAAI...region001.gbk	1	25050	25050	28	0	16231	Anaerostipes_hadrus_MSK.14.9_GCF_013302545.1__r86c1__ctg86_9	Anaerostipes_hadrus_MSK.14.9_GCF_013302545.1__r86c1__ctg86_10		GCF_013302545.1/c00086_NZ_JAAI...region001_8 # 6082 # 6231 # -1 # ID=31091_8;partial=00;start_type=ATG;rbs_motif=AGGAG;rbs_spacer=5-10bp;gc_cont=0.380	Y
Anaerostipes_hadrus_MSK.15.34_GCF_013303225.1	Firmicutes	Clostridia	Eubacteriales	Lachnospiraceae	Anaerostipes	r68c1	cyclic-lactone-autoinducer	c00068_NZ_JAAI...region001.gbk	1	6346	6346	9	0	6346	Anaerostipes_hadrus_MSK.15.34_GCF_013303225.1__r68c1__ctg68_2	Anaerostipes_hadrus_MSK.15.34_GCF_013303225.1__r68c1__ctg68_1		GCF_013303225.1/c00068_NZ_JAAI...region001_1 # 116 # 265 # 1 # ID=31537_1;partial=00;start_type=ATG;rbs_motif=AGGAG;rbs_spacer=5-10bp;gc_cont=0.380	Y
Anaerostipes_hadrus_MSK.15.37_GCF_013302455.1	Firmicutes	Clostridia	Eubacteriales	Lachnospiraceae	Anaerostipes	r1c1	cyclic-lactone-autoinducer,lanthipeptide-class-ii	c00001_NZ_JAAI...region001.gbk	1	25050	25050	28	0	16231	Anaerostipes_hadrus_MSK.15.37_GCF_013302455.1__r1c1__ctg1_9	Anaerostipes_hadrus_MSK.15.37_GCF_013302455.1__r1c1__ctg1_10		GCF_013302455.1/c00001_NZ_JAAI...region001_8 # 6082 # 6231 # -1 # ID=32061_8;partial=00;start_type=ATG;rbs_motif=AGGAG;rbs_spacer=5-10bp;gc_cont=0.380	Y
Anaerostipes_sp._MSJ-23_GCF_018918155.1	Firmicutes	Clostridia	Eubacteriales	Lachnospiraceae	Anaerostipes	r14c1	cyclic-lactone-autoinducer	c00014_NZ_JAHL...region001.gbk	1	19803	19803	25	0	19803	Anaerostipes_sp._MSJ-23_GCF_018918155.1__r14c1__ctg14_12	Anaerostipes_sp._MSJ-23_GCF_018918155.1__r14c1__ctg14_13		GCF_018918155.1/c00014_NZ_JAHL...region001_13 # 9660 # 9803 # -1 # ID=32461_13;partial=00;start_type=ATG;rbs_motif=AGGAG;rbs_spacer=5-10bp;gc_cont=0.347	Y
Anaerotignum_lactatifermentans_An75_GCF_002161375.1	Firmicutes	Clostridia	Eubacteriales	Lachnospiraceae	Anaerotignum	r53c1	cyclic-lactone-autoinducer	NZ_NFHM01000057.region001.gbk	1	5283	5283	7	0	5283	Anaerotignum_lactatifermentans_An75_GCF_002161375.1__r53c1__ctg53_2	Anaerotignum_lactatifermentans_An75_GCF_002161375.1__r53c1__ctg53_3		GCF_002161375.1/NZ_NFHM01000057.region001_2 # 1105 # 1263 # -1 # ID=32847_2;partial=00;start_type=ATG;rbs_motif=GGAGG;rbs_spacer=5-10bp;gc_cont=0.333	Y
Anaerotignum_lactatifermentans_Chicken_18_mag_93_GCF_904382415.1	Firmicutes	Clostridia	Eubacteriales	Lachnospiraceae	Anaerotignum	r10c1	cyclic-lactone-autoinducer	c00010_NZ_CAJF...region001.gbk	1	18426	18426	26	0	18426		Anaerotignum_lactatifermentans_Chicken_18_mag_93_GCF_904382415.1__r10c1__ctg10_12			Y
Anaerotignum_lactatifermentans_Chicken_18_mag_93_GCF_904382415.1	Firmicutes	Clostridia	Eubacteriales	Lachnospiraceae	Anaerotignum	r43c1	cyclic-lactone-autoinducer	c00043_NZ_CAJF...region001.gbk	6757	23071	16315	16	6756	23071	Anaerotignum_lactatifermentans_Chicken_18_mag_93_GCF_904382415.1__r43c1__ctg43_17			GCF_904382415.1/c00043_NZ_CAJF...region001_8 # 9816 # 9974 # 1 # ID=33552_8;partial=00;start_type=ATG;rbs_motif=GGAGG;rbs_spacer=5-10bp;gc_cont=0.340	Y
Anaerotignum_lactatifermentans_DSM_109233_GCF_014982935.1	Firmicutes	Clostridia	Eubacteriales	Lachnospiraceae	Anaerotignum	r24c1	cyclic-lactone-autoinducer	c00024_NZ_JADC...region001.gbk	46509	63031	16523	13	46508	63031	Anaerotignum_lactatifermentans_DSM_109233_GCF_014982935.1__r24c1__ctg24_52	Anaerotignum_lactatifermentans_DSM_109233_GCF_014982935.1__r24c1__ctg24_51		GCF_014982935.1/c00024_NZ_JADC...region001_9 # 10001 # 10159 # 1 # ID=33856_9;partial=00;start_type=ATG;rbs_motif=GGAGG;rbs_spacer=5-10bp;gc_cont=0.340	Y
Anaerotignum_lactatifermentans_DSM_14214_GCF_900142265.1	Firmicutes	Clostridia	Eubacteriales	Lachnospiraceae	Anaerotignum	r65c1	cyclic-lactone-autoinducer	NZ_FRAH01000010.region001.gbk	1	16680	16680	15	0	16680	Anaerotignum_lactatifermentans_DSM_14214_GCF_900142265.1__r65c1__ctg65_6	Anaerotignum_lactatifermentans_DSM_14214_GCF_900142265.1__r65c1__ctg65_7		GCF_900142265.1/NZ_FRAH01000010.region001_6 # 6522 # 6680 # -1 # ID=4_6;partial=00;start_type=ATG;rbs_motif=GGAGG;rbs_spacer=5-10bp;gc_cont=0.333	Y
Anaerotignum_neopropionicum_DSM-3847_GCF_001571775.1	Firmicutes	Clostridia	Eubacteriales	Lachnospiraceae	Anaerotignum	r20c1	cyclic-lactone-autoinducer	NZ_LRVM01000020.region001.gbk	1	10635	10635	13	0	10635	Anaerotignum_neopropionicum_DSM-3847_GCF_001571775.1__r20c1__ctg20_1				N
Anaerotignum_neopropionicum_DSM-3847_GCF_001571775.1	Firmicutes	Clostridia	Eubacteriales	Lachnospiraceae	Anaerotignum	r2c1	cyclic-lactone-autoinducer	NZ_LRVM01000002.region001.gbk	249725	271904	22180	26	249724	271904	Anaerotignum_neopropionicum_DSM-3847_GCF_001571775.1__r2c1__ctg2_274	Anaerotignum_neopropionicum_DSM-3847_GCF_001571775.1__r2c1__ctg2_270		GCF_001571775.1/NZ_LRVM01000002.region001_13 # 9526 # 9672 # 1 # ID=6_13;partial=00;start_type=ATG;rbs_motif=GGA/GAG/AGG;rbs_spacer=5-10bp;gc_cont=0.327	Y
Anaerotignum_neopropionicum_DSM-3847_GCF_001571775.1	Firmicutes	Clostridia	Eubacteriales	Lachnospiraceae	Anaerotignum	r2c2	cyclic-lactone-autoinducer	NZ_LRVM01000002.region002.gbk	424107	434366	10260	9	424106	434366	Anaerotignum_neopropionicum_DSM-3847_GCF_001571775.1__r2c2__ctg2_449				N
Anaerotignum_neopropionicum_DSM-3847_GCF_001571775.1	Firmicutes	Clostridia	Eubacteriales	Lachnospiraceae	Anaerotignum	r9c1	cyclic-lactone-autoinducer	NZ_LRVM01000009.region001.gbk	1	13408	13408	16	0	13408	Anaerotignum_neopropionicum_DSM-3847_GCF_001571775.1__r9c1__ctg9_5			GCF_001571775.1/NZ_LRVM01000009.region001_2 # 490 # 633 # 1 # ID=7_2;partial=00;start_type=ATG;rbs_motif=AGGAG;rbs_spacer=5-10bp;gc_cont=0.347	Y
Anaerotignum_propionicum_DSM_1682_GCF_900129165.1	Firmicutes	Clostridia	Eubacteriales	Lachnospiraceae	Anaerotignum	r16c1	cyclic-lactone-autoinducer	NZ_FQUA01000006.region001.gbk	37987	58580	20594	15	37986	58580	Anaerotignum_propionicum_DSM_1682_GCF_900129165.1__r16c1__ctg16_39				N
Anaerotignum_propionicum_DSM_1682_GCF_900129165.1	Firmicutes	Clostridia	Eubacteriales	Lachnospiraceae	Anaerotignum	r5c1	cyclic-lactone-autoinducer	NZ_FQUA01000009.region001.gbk	2247	22813	20567	21	2246	22813	Anaerotignum_propionicum_DSM_1682_GCF_900129165.1__r5c1__ctg5_13				N
Anaerotignum_propionicum_DSM_1682_X2_GCF_001561955.1	Firmicutes	Clostridia	Eubacteriales	Lachnospiraceae	Anaerotignum	r1c1	cyclic-lactone-autoinducer	NZ_CP014223.1.region001.gbk	1227325	1246340	19016	15	1227324	1246340	Anaerotignum_propionicum_DSM_1682_X2_GCF_001561955.1__r1c1__ctg1_1184				N
Anaerotignum_propionicum_DSM_1682_X2_GCF_001561955.1	Firmicutes	Clostridia	Eubacteriales	Lachnospiraceae	Anaerotignum	r1c2	cyclic-lactone-autoinducer	NZ_CP014223.1.region002.gbk	2096146	2116712	20567	22	2096145	2116712	Anaerotignum_propionicum_DSM_1682_X2_GCF_001561955.1__r1c2__ctg1_1972				N
Anaerovirgula_multivorans_SCA_GCF_900188145.1	Firmicutes	Clostridia	Eubacteriales	0	Anaerovirgula	r17c1	cyclic-lactone-autoinducer	NZ_FZOJ01000037.region001.gbk	1	15231	15231	14	0	15231	Anaerovirgula_multivorans_SCA_GCF_900188145.1__r17c1__ctg17_6				N
Anaerovirgula_multivorans_SCA_GCF_900188145.1	Firmicutes	Clostridia	Eubacteriales	0	Anaerovirgula	r23c1	cyclic-lactone-autoinducer	NZ_FZOJ01000055.region001.gbk	1	14682	14682	16	0	14682	Anaerovirgula_multivorans_SCA_GCF_900188145.1__r23c1__ctg23_9	Anaerovirgula_multivorans_SCA_GCF_900188145.1__r23c1__ctg23_8		GCF_900188145.1/NZ_FZOJ01000055.region001_7 # 3927 # 4067 # -1 # ID=23_7;partial=00;start_type=ATG;rbs_motif=GGA/GAG/AGG;rbs_spacer=5-10bp;gc_cont=0.326	Y
Anaerovirgula_multivorans_SCA_GCF_900188145.1	Firmicutes	Clostridia	Eubacteriales	0	Anaerovirgula	r25c1	cyclic-lactone-autoinducer	NZ_FZOJ01000023.region001.gbk	1	18244	18244	14	0	18244	Anaerovirgula_multivorans_SCA_GCF_900188145.1__r25c1__ctg25_7				N
Anaerovirgula_multivorans_SCA_GCF_900188145.1	Firmicutes	Clostridia	Eubacteriales	0	Anaerovirgula	r46c1	cyclic-lactone-autoinducer	NZ_FZOJ01000042.region001.gbk	19075	32206	13132	16	19074	32206	Anaerovirgula_multivorans_SCA_GCF_900188145.1__r46c1__ctg46_36			GCF_900188145.1/NZ_FZOJ01000042.region001_15 # 10576 # 10719 # -1 # ID=25_15;partial=00;start_type=ATG;rbs_motif=GGAG/GAGG;rbs_spacer=5-10bp;gc_cont=0.326	Y
Anaerovirgula_multivorans_SCA_GCF_900188145.1	Firmicutes	Clostridia	Eubacteriales	0	Anaerovirgula	r51c1	cyclic-lactone-autoinducer	NZ_FZOJ01000021.region001.gbk	39372	59491	20120	18	39371	59491		Anaerovirgula_multivorans_SCA_GCF_900188145.1__r51c1__ctg51_48			Y
Anaerovirgula_multivorans_SCA_GCF_900188145.1	Firmicutes	Clostridia	Eubacteriales	0	Anaerovirgula	r62c1	cyclic-lactone-autoinducer	NZ_FZOJ01000013.region001.gbk	51104	78491	27388	28	51103	78491	Anaerovirgula_multivorans_SCA_GCF_900188145.1__r62c1__ctg62_54::Anaerovirgula_multivorans_SCA_GCF_900188145.1__r62c1__ctg62_62	Anaerovirgula_multivorans_SCA_GCF_900188145.1__r62c1__ctg62_53		GCF_900188145.1/NZ_FZOJ01000013.region001_9 # 10001 # 10135 # -1 # ID=26_9;partial=00;start_type=ATG;rbs_motif=AGGAG;rbs_spacer=5-10bp;gc_cont=0.252	Y
Anaerovirgula_multivorans_SCA_GCF_900188145.1	Firmicutes	Clostridia	Eubacteriales	0	Anaerovirgula	r71c1	cyclic-lactone-autoinducer	NZ_FZOJ01000048.region001.gbk	1	14512	14512	15	0	14512	Anaerovirgula_multivorans_SCA_GCF_900188145.1__r71c1__ctg71_6				N
Anaerovirgula_multivorans_SCA_GCF_900188145.1	Firmicutes	Clostridia	Eubacteriales	0	Anaerovirgula	r78c1	cyclic-lactone-autoinducer	NZ_FZOJ01000057.region001.gbk	159	15819	15661	17	158	15819	Anaerovirgula_multivorans_SCA_GCF_900188145.1__r78c1__ctg78_12				N
Anaerovirgula_multivorans_SCA_GCF_900188145.1	Firmicutes	Clostridia	Eubacteriales	0	Anaerovirgula	r92c1	cyclic-lactone-autoinducer	NZ_FZOJ01000079.region001.gbk	1	3587	3587	7	0	3587		Anaerovirgula_multivorans_SCA_GCF_900188145.1__r92c1__ctg92_3			Y
Anaerovorax_odorimutans_DSM_5092_GCF_000426305.1	Firmicutes	Clostridia	Eubacteriales	Eubacteriales Family XIII. Incertae Sedis	Anaerovorax	r13c1	cyclic-lactone-autoinducer	NZ_AUFC01000016.region001.gbk	3750	24340	20591	20	3749	24340	Anaerovorax_odorimutans_DSM_5092_GCF_000426305.1__r13c1__ctg13_15			GCF_000426305.1/NZ_AUFC01000016.region001_13 # 10578 # 10715 # 1 # ID=29_13;partial=00;start_type=ATG;rbs_motif=GGA/GAG/AGG;rbs_spacer=5-10bp;gc_cont=0.362	Y
Anaerovorax_sp._IOR16_GCF_017168145.1	Firmicutes	Clostridia	Eubacteriales	Eubacteriales Family XIII. Incertae Sedis	Anaerovorax	r9c1	cyclic-lactone-autoinducer	c00009_NZ_JADQ...region001.gbk	146608	167193	20586	19	146607	167193	Anaerovorax_sp._IOR16_GCF_017168145.1__r9c1__ctg9_135	Anaerovorax_sp._IOR16_GCF_017168145.1__r9c1__ctg9_134			Y
Andreesenia_angusta_DSM_1989_GCF_001855385.1	Firmicutes	Tissierellia	Tissierellales	Gottschalkiaceae	Andreesenia	r3c1	RiPP-like,cyclic-lactone-autoinducer	NZ_MKIE01000003.region001.gbk	14764	35228	20465	15	14763	35228	Andreesenia_angusta_DSM_1989_GCF_001855385.1__r3c1__ctg3_19				N
Aneurinibacillus_aneurinilyticus_ATCC_12856_GCF_000466385.1	Firmicutes	Bacilli	Bacillales	Paenibacillaceae	Aneurinibacillus	r226c1	cyclic-lactone-autoinducer	NZ_KE952892.1.region001.gbk	3697	24379	20683	37	3696	24379	Aneurinibacillus_aneurinilyticus_ATCC_12856_GCF_000466385.1__r226c1__ctg226_20	Aneurinibacillus_aneurinilyticus_ATCC_12856_GCF_000466385.1__r226c1__ctg226_19			Y
Aneurinibacillus_aneurinilyticus_ATCC_12856_GCF_000466385.1	Firmicutes	Bacilli	Bacillales	Paenibacillaceae	Aneurinibacillus	r247c1	cyclic-lactone-autoinducer	NZ_KE952919.1.region001.gbk	1	13084	13084	14	0	13084	Aneurinibacillus_aneurinilyticus_ATCC_12856_GCF_000466385.1__r247c1__ctg247_7	Aneurinibacillus_aneurinilyticus_ATCC_12856_GCF_000466385.1__r247c1__ctg247_6		GCF_000466385.1/NZ_KE952919.1.region001_4 # 2396 # 2515 # -1 # ID=68_4;partial=00;start_type=ATG;rbs_motif=AGGAGG;rbs_spacer=5-10bp;gc_cont=0.417	Y
Aneurinibacillus_aneurinilyticus_MGYG-HGUT-01453_GCF_902375125.1	Firmicutes	Bacilli	Bacillales	Paenibacillaceae	Aneurinibacillus	r226c1	cyclic-lactone-autoinducer	c00226_NZ_CABK...region001.gbk	3697	24379	20683	37	3696	24379	Aneurinibacillus_aneurinilyticus_MGYG-HGUT-01453_GCF_902375125.1__r226c1__ctg226_20	Aneurinibacillus_aneurinilyticus_MGYG-HGUT-01453_GCF_902375125.1__r226c1__ctg226_19			Y
Aneurinibacillus_aneurinilyticus_MGYG-HGUT-01453_GCF_902375125.1	Firmicutes	Bacilli	Bacillales	Paenibacillaceae	Aneurinibacillus	r247c1	cyclic-lactone-autoinducer	c00247_NZ_CABK...region001.gbk	1	13084	13084	14	0	13084	Aneurinibacillus_aneurinilyticus_MGYG-HGUT-01453_GCF_902375125.1__r247c1__ctg247_7	Aneurinibacillus_aneurinilyticus_MGYG-HGUT-01453_GCF_902375125.1__r247c1__ctg247_6		GCF_902375125.1/c00247_NZ_CABK...region001_4 # 2396 # 2515 # -1 # ID=70_4;partial=00;start_type=ATG;rbs_motif=AGGAGG;rbs_spacer=5-10bp;gc_cont=0.417	Y
Aneurinibacillus_aneurinilyticus_WB01_D5_05_GCF_012844185.1	Firmicutes	Bacilli	Bacillales	Paenibacillaceae	Aneurinibacillus	r70c1	cyclic-lactone-autoinducer	c00070_NZ_JABA...region001.gbk	14183	34871	20689	25	14182	34871	Aneurinibacillus_aneurinilyticus_WB01_D5_05_GCF_012844185.1__r70c1__ctg70_20	Aneurinibacillus_aneurinilyticus_WB01_D5_05_GCF_012844185.1__r70c1__ctg70_21		GCF_012844185.1/c00070_NZ_JABA...region001_9 # 10570 # 10689 # 1 # ID=71_9;partial=00;start_type=ATG;rbs_motif=AGGAGG;rbs_spacer=5-10bp;gc_cont=0.408	Y
Aneurinibacillus_danicus_NBRC_102444_GCF_007991215.1	Firmicutes	Bacilli	Bacillales	Paenibacillaceae	Aneurinibacillus	r218c1	cyclic-lactone-autoinducer	NZ_BJXX01000225.region001.gbk	1	1973	1973	4	0	1973	Aneurinibacillus_danicus_NBRC_102444_GCF_007991215.1__r218c1__ctg218_2	Aneurinibacillus_danicus_NBRC_102444_GCF_007991215.1__r218c1__ctg218_3		GCF_007991215.1/NZ_BJXX01000225.region001_3 # 1534 # 1668 # 1 # ID=117_3;partial=00;start_type=ATG;rbs_motif=AAAAAA;rbs_spacer=13bp;gc_cont=0.504	Y
Aneurinibacillus_migulanus_DSM_2895_GCF_001274715.1	Firmicutes	Bacilli	Bacillales	Paenibacillaceae	Aneurinibacillus	r15c1	cyclic-lactone-autoinducer,terpene	NZ_LGUG01000013.region001.gbk	93143	120232	27090	30	99543	120232	Aneurinibacillus_migulanus_DSM_2895_GCF_001274715.1__r15c1__ctg15_106	Aneurinibacillus_migulanus_DSM_2895_GCF_001274715.1__r15c1__ctg15_105		GCF_001274715.1/NZ_LGUG01000013.region001_20 # 16402 # 16518 # -1 # ID=2004_20;partial=00;start_type=ATG;rbs_motif=AGxAGG/AGGxGG;rbs_spacer=11-12bp;gc_cont=0.410	Y
Aneurinibacillus_migulanus_DSM_2895_GCF_001274715.1	Firmicutes	Bacilli	Bacillales	Paenibacillaceae	Aneurinibacillus	r18c2	cyclic-lactone-autoinducer	NZ_LGUG01000004.region002.gbk	1064183	1084949	20767	18	1064182	1084949	Aneurinibacillus_migulanus_DSM_2895_GCF_001274715.1__r18c2__ctg18_1104	Aneurinibacillus_migulanus_DSM_2895_GCF_001274715.1__r18c2__ctg18_1103		GCF_001274715.1/NZ_LGUG01000004.region002_10 # 10001 # 10135 # -1 # ID=2005_10;partial=00;start_type=ATG;rbs_motif=AGGAGG;rbs_spacer=5-10bp;gc_cont=0.363	Y
Aneurinibacillus_migulanus_DSM_2895_GCF_900100065.1	Firmicutes	Bacilli	Bacillales	Paenibacillaceae	Aneurinibacillus	r29c1	cyclic-lactone-autoinducer,terpene	NZ_FNED01000015.region001.gbk	16300	43389	27090	29	16299	36988	Aneurinibacillus_migulanus_DSM_2895_GCF_900100065.1__r29c1__ctg29_22	Aneurinibacillus_migulanus_DSM_2895_GCF_900100065.1__r29c1__ctg29_23		GCF_900100065.1/NZ_FNED01000015.region001_9 # 10573 # 10689 # 1 # ID=4698_9;partial=00;start_type=ATG;rbs_motif=AGxAGG/AGGxGG;rbs_spacer=11-12bp;gc_cont=0.410	Y
Aneurinibacillus_migulanus_DSM_2895_GCF_900100065.1	Firmicutes	Bacilli	Bacillales	Paenibacillaceae	Aneurinibacillus	r49c1	cyclic-lactone-autoinducer	NZ_FNED01000006.region001.gbk	2647	23413	20767	18	2646	23413	Aneurinibacillus_migulanus_DSM_2895_GCF_900100065.1__r49c1__ctg49_16	Aneurinibacillus_migulanus_DSM_2895_GCF_900100065.1__r49c1__ctg49_15		GCF_900100065.1/NZ_FNED01000006.region001_10 # 10001 # 10135 # -1 # ID=4699_10;partial=00;start_type=ATG;rbs_motif=AGGAGG;rbs_spacer=5-10bp;gc_cont=0.363	Y
Aneurinibacillus_migulanus_GCF_001282925.1	Firmicutes	Bacilli	Bacillales	Paenibacillaceae	Aneurinibacillus	r31c1	cyclic-lactone-autoinducer	NZ_CCMI01000042.region001.gbk	2853	23619	20767	18	2852	23619	Aneurinibacillus_migulanus_GCF_001282925.1__r31c1__ctg31_16	Aneurinibacillus_migulanus_GCF_001282925.1__r31c1__ctg31_15		GCF_001282925.1/NZ_CCMI01000042.region001_10 # 10001 # 10135 # -1 # ID=4700_10;partial=00;start_type=ATG;rbs_motif=AGGAGG;rbs_spacer=5-10bp;gc_cont=0.363	Y
Aneurinibacillus_migulanus_GCF_001282925.1	Firmicutes	Bacilli	Bacillales	Paenibacillaceae	Aneurinibacillus	r58c1	cyclic-lactone-autoinducer,terpene	NZ_CCMI01000127.region001.gbk	92197	119394	27198	30	98705	119394	Aneurinibacillus_migulanus_GCF_001282925.1__r58c1__ctg58_108	Aneurinibacillus_migulanus_GCF_001282925.1__r58c1__ctg58_107		GCF_001282925.1/NZ_CCMI01000127.region001_23 # 16510 # 16626 # -1 # ID=4701_23;partial=00;start_type=ATG;rbs_motif=AGxAGG/AGGxGG;rbs_spacer=11-12bp;gc_cont=0.410	Y
Aneurinibacillus_migulanus_Nagano_E1_GCF_001294525.1	Firmicutes	Bacilli	Bacillales	Paenibacillaceae	Aneurinibacillus	r145c1	cyclic-lactone-autoinducer	NZ_LIXL01000233.region001.gbk	174446	195212	20767	18	174445	195212	Aneurinibacillus_migulanus_Nagano_E1_GCF_001294525.1__r145c1__ctg145_175	Aneurinibacillus_migulanus_Nagano_E1_GCF_001294525.1__r145c1__ctg145_176		GCF_001294525.1/NZ_LIXL01000233.region001_9 # 10633 # 10767 # 1 # ID=4708_9;partial=00;start_type=ATG;rbs_motif=AGGAGG;rbs_spacer=5-10bp;gc_cont=0.378	Y
Aneurinibacillus_migulanus_nagano_GCF_000878885.1	Firmicutes	Bacilli	Bacillales	Paenibacillaceae	Aneurinibacillus	r3c1	cyclic-lactone-autoinducer	NZ_JYBN01000073.region001.gbk	57562	78328	20767	18	57561	78328	Aneurinibacillus_migulanus_nagano_GCF_000878885.1__r3c1__ctg3_92	Aneurinibacillus_migulanus_nagano_GCF_000878885.1__r3c1__ctg3_91		GCF_000878885.1/NZ_JYBN01000073.region001_11 # 10001 # 10135 # -1 # ID=4709_11;partial=00;start_type=ATG;rbs_motif=AGGAGG;rbs_spacer=5-10bp;gc_cont=0.370	Y
Aneurinibacillus_migulanus_NBRC_15520_GCF_006539965.1	Firmicutes	Bacilli	Bacillales	Paenibacillaceae	Aneurinibacillus	r16c1	cyclic-lactone-autoinducer	NZ_BJOA01000017.region001.gbk	1	10298	10298	11	0	10298	Aneurinibacillus_migulanus_NBRC_15520_GCF_006539965.1__r16c1__ctg16_9	Aneurinibacillus_migulanus_NBRC_15520_GCF_006539965.1__r16c1__ctg16_8		GCF_006539965.1/NZ_BJOA01000017.region001_8 # 7715 # 7849 # -1 # ID=4719_8;partial=00;start_type=ATG;rbs_motif=AGGAGG;rbs_spacer=5-10bp;gc_cont=0.363	Y
Aneurinibacillus_migulanus_NBRC_15520_GCF_006539965.1	Firmicutes	Bacilli	Bacillales	Paenibacillaceae	Aneurinibacillus	r343c1	cyclic-lactone-autoinducer	NZ_BJOA01000352.region001.gbk	1	3375	3375	5	0	3375	Aneurinibacillus_migulanus_NBRC_15520_GCF_006539965.1__r343c1__ctg343_4	Aneurinibacillus_migulanus_NBRC_15520_GCF_006539965.1__r343c1__ctg343_3		GCF_006539965.1/NZ_BJOA01000352.region001_3 # 1303 # 1419 # -1 # ID=4720_3;partial=00;start_type=ATG;rbs_motif=AGxAGG/AGGxGG;rbs_spacer=11-12bp;gc_cont=0.410	Y
Aneurinibacillus_migulanus_NCTC_7096_GCF_000878905.1	Firmicutes	Bacilli	Bacillales	Paenibacillaceae	Aneurinibacillus	r25c1	cyclic-lactone-autoinducer,terpene	NZ_JYBO01000094.region001.gbk	92197	119394	27198	30	98705	119394	Aneurinibacillus_migulanus_NCTC_7096_GCF_000878905.1__r25c1__ctg25_108	Aneurinibacillus_migulanus_NCTC_7096_GCF_000878905.1__r25c1__ctg25_107		GCF_000878905.1/NZ_JYBO01000094.region001_23 # 16510 # 16626 # -1 # ID=4721_23;partial=00;start_type=ATG;rbs_motif=AGxAGG/AGGxGG;rbs_spacer=11-12bp;gc_cont=0.410	Y
Aneurinibacillus_migulanus_NCTC_7096_GCF_000878905.1	Firmicutes	Bacilli	Bacillales	Paenibacillaceae	Aneurinibacillus	r63c1	cyclic-lactone-autoinducer	NZ_JYBO01000042.region001.gbk	2853	23619	20767	18	2852	23619	Aneurinibacillus_migulanus_NCTC_7096_GCF_000878905.1__r63c1__ctg63_16	Aneurinibacillus_migulanus_NCTC_7096_GCF_000878905.1__r63c1__ctg63_15		GCF_000878905.1/NZ_JYBO01000042.region001_10 # 10001 # 10135 # -1 # ID=4722_10;partial=00;start_type=ATG;rbs_motif=AGGAGG;rbs_spacer=5-10bp;gc_cont=0.363	Y
Aneurinibacillus_soli_CB4_GCF_002355375.1	Firmicutes	Bacilli	Bacillales	Paenibacillaceae	Aneurinibacillus	r1c5	cyclic-lactone-autoinducer	NZ_AP017312.1.region005.gbk	3919823	3940580	20758	16	3919822	3940580	Aneurinibacillus_soli_CB4_GCF_002355375.1__r1c5__ctg1_3835	Aneurinibacillus_soli_CB4_GCF_002355375.1__r1c5__ctg1_3836		GCF_002355375.1/NZ_AP017312.1.region005_9 # 10624 # 10758 # 1 # ID=4782_9;partial=00;start_type=ATG;rbs_motif=AGxAGG/AGGxGG;rbs_spacer=5-10bp;gc_cont=0.430	Y
Aneurinibacillus_soli_CECT_8566_GCF_003217555.1	Firmicutes	Bacilli	Bacillales	Paenibacillaceae	Aneurinibacillus	r6c1	cyclic-lactone-autoinducer	NZ_QJSZ01000006.region001.gbk	137968	158725	20758	16	137967	158725	Aneurinibacillus_soli_CECT_8566_GCF_003217555.1__r6c1__ctg6_140	Aneurinibacillus_soli_CECT_8566_GCF_003217555.1__r6c1__ctg6_141		GCF_003217555.1/NZ_QJSZ01000006.region001_9 # 10624 # 10758 # 1 # ID=4785_9;partial=00;start_type=ATG;rbs_motif=AGxAGG/AGGxGG;rbs_spacer=5-10bp;gc_cont=0.430	Y
Aneurinibacillus_sp._XH2_DE0033_GCF_008764455.1	Firmicutes	Bacilli	Bacillales	Paenibacillaceae	Aneurinibacillus	r29c1	cyclic-lactone-autoinducer	NZ_VTRI01000006.region001.gbk	1	10753	10753	11	0	10753	Aneurinibacillus_sp._XH2_DE0033_GCF_008764455.1__r29c1__ctg29_1				N
Aneurinibacillus_sp._XH2_GCF_001439585.2	Firmicutes	Bacilli	Bacillales	Paenibacillaceae	Aneurinibacillus	r1c10	cyclic-lactone-autoinducer	NZ_CP014140.1.region010.gbk	3343432	3364120	20689	18	3343431	3364120	Aneurinibacillus_sp._XH2_GCF_001439585.2__r1c10__ctg1_3346	Aneurinibacillus_sp._XH2_GCF_001439585.2__r1c10__ctg1_3345		GCF_001439585.2/NZ_CP014140.1.region010_9 # 10001 # 10120 # -1 # ID=9546_9;partial=00;start_type=ATG;rbs_motif=AGxAGG/AGGxGG;rbs_spacer=5-10bp;gc_cont=0.458	Y
Aneurinibacillus_sp._XH2_GCF_001439585.2	Firmicutes	Bacilli	Bacillales	Paenibacillaceae	Aneurinibacillus	r1c5	cyclic-lactone-autoinducer	NZ_CP014140.1.region005.gbk	1668928	1687440	18513	22	1668927	1687440	Aneurinibacillus_sp._XH2_GCF_001439585.2__r1c5__ctg1_1681	Aneurinibacillus_sp._XH2_GCF_001439585.2__r1c5__ctg1_1680		GCF_001439585.2/NZ_CP014140.1.region005_10 # 8673 # 8807 # -1 # ID=9547_10;partial=00;start_type=ATG;rbs_motif=AGGAGG;rbs_spacer=5-10bp;gc_cont=0.407	Y
Aneurinibacillus_terranovensis_DSM_18919_GCF_000430625.1	Firmicutes	Bacilli	Bacillales	Paenibacillaceae	Aneurinibacillus	r45c1	cyclic-lactone-autoinducer	NZ_AUMJ01000063.region001.gbk	1	17321	17321	15	0	17321	Aneurinibacillus_terranovensis_DSM_18919_GCF_000430625.1__r45c1__ctg45_8			GCF_000430625.1/NZ_AUMJ01000063.region001_8 # 7328 # 7462 # 1 # ID=9548_8;partial=00;start_type=ATG;rbs_motif=AGGAGG;rbs_spacer=5-10bp;gc_cont=0.459	Y
Aneurinibacillus_thermoaerophilus_L_420-91_GCF_900099925.1	Firmicutes	Bacilli	Bacillales	Paenibacillaceae	Aneurinibacillus	r12c1	cyclic-lactone-autoinducer	NZ_FNDE01000030.region001.gbk	10709	31397	20689	17	10708	31397	Aneurinibacillus_thermoaerophilus_L_420-91_GCF_900099925.1__r12c1__ctg12_20	Aneurinibacillus_thermoaerophilus_L_420-91_GCF_900099925.1__r12c1__ctg12_19		GCF_900099925.1/NZ_FNDE01000030.region001_9 # 10001 # 10120 # -1 # ID=9549_9;partial=00;start_type=ATG;rbs_motif=AGxAGG/AGGxGG;rbs_spacer=5-10bp;gc_cont=0.467	Y
Aneurinibacillus_thermoaerophilus_L_420-91_GCF_900099925.1	Firmicutes	Bacilli	Bacillales	Paenibacillaceae	Aneurinibacillus	r33c1	cyclic-lactone-autoinducer	NZ_FNDE01000005.region001.gbk	127966	140347	12382	16	127965	140347	Aneurinibacillus_thermoaerophilus_L_420-91_GCF_900099925.1__r33c1__ctg33_131	Aneurinibacillus_thermoaerophilus_L_420-91_GCF_900099925.1__r33c1__ctg33_132		GCF_900099925.1/NZ_FNDE01000005.region001_12 # 10632 # 10766 # 1 # ID=9550_12;partial=00;start_type=ATG;rbs_motif=AGGAG;rbs_spacer=5-10bp;gc_cont=0.407	Y
Asaccharospora_irregularis_DSM_2635_GCF_900129815.1	Firmicutes	Clostridia	Eubacteriales	Peptostreptococcaceae	Asaccharospora	r49c1	cyclic-lactone-autoinducer	NZ_FQWX01000005.region001.gbk	1	14668	14668	17	0	14668	Asaccharospora_irregularis_DSM_2635_GCF_900129815.1__r49c1__ctg49_8	Asaccharospora_irregularis_DSM_2635_GCF_900129815.1__r49c1__ctg49_7		GCF_900129815.1/NZ_FQWX01000005.region001_6 # 3938 # 4078 # -1 # ID=10355_6;partial=00;start_type=ATG;rbs_motif=None;rbs_spacer=None;gc_cont=0.284	Y
Asaccharospora_irregularis_DSM_2635_GCF_900129815.1	Firmicutes	Clostridia	Eubacteriales	Peptostreptococcaceae	Asaccharospora	r51c1	cyclic-lactone-autoinducer	NZ_FQWX01000007.region001.gbk	18659	39315	20657	22	18658	39315	Asaccharospora_irregularis_DSM_2635_GCF_900129815.1__r51c1__ctg51_29				N
Bacillus_alveayuensis_24KAM51_GCF_000948175.1	Firmicutes	Bacilli	Bacillales	Bacillaceae	Bacillus	r140c1	cyclic-lactone-autoinducer	NZ_JYCE01000140.region001.gbk	1	16988	16988	22	0	16988	Bacillus_alveayuensis_24KAM51_GCF_000948175.1__r140c1__ctg140_8	Bacillus_alveayuensis_24KAM51_GCF_000948175.1__r140c1__ctg140_9		GCF_000948175.1/NZ_JYCE01000140.region001_9 # 6851 # 6988 # 1 # ID=10357_9;partial=00;start_type=ATG;rbs_motif=GGAG/GAGG;rbs_spacer=5-10bp;gc_cont=0.362	Y
Bacillus_amyloliquefaciens_IMA411_GCF_017592865.1	Firmicutes	Bacilli	Bacillales	Bacillaceae	Bacillus	r10c1	cyclic-lactone-autoinducer,lanthipeptide-class-ii	c00010_NZ_JAGF...region001.gbk	2438	31853	29416	30	2437	23200	Bacillus_amyloliquefaciens_IMA411_GCF_017592865.1__r10c1__ctg10_17	Bacillus_amyloliquefaciens_IMA411_GCF_017592865.1__r10c1__ctg10_16		GCF_017592865.1/c00010_NZ_JAGF...region001_13 # 10001 # 10132 # -1 # ID=10358_13;partial=00;start_type=ATG;rbs_motif=AGGAG;rbs_spacer=5-10bp;gc_cont=0.356	Y
Bacillus_amyloliquefaciens_UMAF6639_GCF_001593765.1	Firmicutes	Bacilli	Bacillales	Bacillaceae	Bacillus	r1c10	cyclic-lactone-autoinducer,lanthipeptide-class-ii	NZ_CP006058.1.region010.gbk	2810233	2839648	29416	30	2810232	2830995	Bacillus_amyloliquefaciens_UMAF6639_GCF_001593765.1__r1c10__ctg1_2720	Bacillus_amyloliquefaciens_UMAF6639_GCF_001593765.1__r1c10__ctg1_2719		GCF_001593765.1/NZ_CP006058.1.region010_13 # 10001 # 10132 # -1 # ID=10359_13;partial=00;start_type=ATG;rbs_motif=AGGAG;rbs_spacer=5-10bp;gc_cont=0.356	Y
Bacillus_amyloliquefaciens_XK-4-1_GCF_001294785.1	Firmicutes	Bacilli	Bacillales	Bacillaceae	Bacillus	r33c1	cyclic-lactone-autoinducer,lanthipeptide-class-ii	NZ_LJDI01000009.region001.gbk	2525	31940	29416	30	2524	23287	Bacillus_amyloliquefaciens_XK-4-1_GCF_001294785.1__r33c1__ctg33_17	Bacillus_amyloliquefaciens_XK-4-1_GCF_001294785.1__r33c1__ctg33_16		GCF_001294785.1/NZ_LJDI01000009.region001_13 # 10001 # 10132 # -1 # ID=10376_13;partial=00;start_type=ATG;rbs_motif=AGGAG;rbs_spacer=5-10bp;gc_cont=0.356	Y
Bacillus_anthracis_RIT375_GCF_001029875.1	Firmicutes	Bacilli	Bacillales	Bacillaceae	Bacillus	r4c1	LAP,cyclic-lactone-autoinducer,thiopeptide	NZ_LDPG01000012.region001.gbk	82933	115114	32182	24	82932	103571	Bacillus_anthracis_RIT375_GCF_001029875.1__r4c1__ctg4_76			GCF_001029875.1/NZ_LDPG01000012.region001_6 # 9859 # 10008 # -1 # ID=10377_6;partial=00;start_type=ATG;rbs_motif=AGxAG;rbs_spacer=5-10bp;gc_cont=0.373	Y
Bacillus_aquiflavi_3H-10_GCF_011008855.1	Firmicutes	Bacilli	Bacillales	Bacillaceae	Bacillus	r77c1	cyclic-lactone-autoinducer	c00077_NZ_JAAI...region001.gbk	1	7821	7821	10	0	7821	Bacillus_aquiflavi_3H-10_GCF_011008855.1__r77c1__ctg77_3	Bacillus_aquiflavi_3H-10_GCF_011008855.1__r77c1__ctg77_2		GCF_011008855.1/c00077_NZ_JAAI...region001_2 # 868 # 1005 # -1 # ID=13567_2;partial=00;start_type=ATG;rbs_motif=AGGAG;rbs_spacer=5-10bp;gc_cont=0.333	Y
Bacillus_aquiflavi_s-12_GCF_013867695.1	Firmicutes	Bacilli	Bacillales	Bacillaceae	Bacillus	r70c1	cyclic-lactone-autoinducer	c00070_NZ_JACE...region001.gbk	1	7821	7821	10	0	7821	Bacillus_aquiflavi_s-12_GCF_013867695.1__r70c1__ctg70_3	Bacillus_aquiflavi_s-12_GCF_013867695.1__r70c1__ctg70_2		GCF_013867695.1/c00070_NZ_JACE...region001_2 # 868 # 1005 # -1 # ID=13598_2;partial=00;start_type=ATG;rbs_motif=AGGAG;rbs_spacer=5-10bp;gc_cont=0.333	Y
Bacillus_cecembensis_DSM_21993_GCF_001439635.1	Firmicutes	Bacilli	Bacillales	Bacillaceae	Bacillus	r47c1	cyclic-lactone-autoinducer	NZ_LMBZ01000019.region001.gbk	18207	38939	20733	19	18206	38939	Bacillus_cecembensis_DSM_21993_GCF_001439635.1__r47c1__ctg47_20	Bacillus_cecembensis_DSM_21993_GCF_001439635.1__r47c1__ctg47_19		GCF_001439635.1/NZ_LMBZ01000019.region001_9 # 10001 # 10171 # -1 # ID=13618_9;partial=00;start_type=ATG;rbs_motif=AGGAG;rbs_spacer=5-10bp;gc_cont=0.322	Y
Bacillus_cereus_03BB87_GCF_000789315.1	Firmicutes	Bacilli	Bacillales	Bacillaceae	Bacillus	r1c10	LAP,cyclic-lactone-autoinducer,thiopeptide	NZ_CP009941.1.region010.gbk	4830733	4863058	32326	25	4830732	4851513	Bacillus_cereus_03BB87_GCF_000789315.1__r1c10__ctg1_4947	Bacillus_cereus_03BB87_GCF_000789315.1__r1c10__ctg1_4946		GCF_000789315.1/NZ_CP009941.1.region010_6 # 10001 # 10150 # -1 # ID=13619_6;partial=00;start_type=ATG;rbs_motif=AGxAG;rbs_spacer=5-10bp;gc_cont=0.373	Y
Bacillus_cereus_AFS009162_GCF_002562445.1	Firmicutes	Bacilli	Bacillales	Bacillaceae	Bacillus	r1c1	cyclic-lactone-autoinducer,lanthipeptide-class-ii	NZ_NTWU01000010.region001.gbk	149864	177853	27990	29	149863	170575	Bacillus_cereus_AFS009162_GCF_002562445.1__r1c1__ctg1_184	Bacillus_cereus_AFS009162_GCF_002562445.1__r1c1__ctg1_183		GCF_002562445.1/NZ_NTWU01000010.region001_13 # 10001 # 10141 # -1 # ID=13620_13;partial=00;start_type=ATG;rbs_motif=AGGAG;rbs_spacer=5-10bp;gc_cont=0.305	Y
Bacillus_cereus_AFS021040_GCF_002563095.1	Firmicutes	Bacilli	Bacillales	Bacillaceae	Bacillus	r31c1	LAP,cyclic-lactone-autoinducer,thiopeptide	NZ_NTSH01000003.region001.gbk	77528	100937	23410	17	77527	98308	Bacillus_cereus_AFS021040_GCF_002563095.1__r31c1__ctg31_74	Bacillus_cereus_AFS021040_GCF_002563095.1__r31c1__ctg31_73		GCF_002563095.1/NZ_NTSH01000003.region001_6 # 10001 # 10150 # -1 # ID=14426_6;partial=00;start_type=ATG;rbs_motif=AGxAG;rbs_spacer=5-10bp;gc_cont=0.367	Y
Bacillus_cereus_AFS067103_GCF_002568505.1	Firmicutes	Bacilli	Bacillales	Bacillaceae	Bacillus	r87c1	cyclic-lactone-autoinducer	NZ_NVBP01000086.region001.gbk	1	8789	8789	9	0	8789	Bacillus_cereus_AFS067103_GCF_002568505.1__r87c1__ctg87_5	Bacillus_cereus_AFS067103_GCF_002568505.1__r87c1__ctg87_6		GCF_002568505.1/NZ_NVBP01000086.region001_6 # 3975 # 4124 # 1 # ID=14475_6;partial=00;start_type=ATG;rbs_motif=AGxAG;rbs_spacer=5-10bp;gc_cont=0.367	Y
Bacillus_cereus_AFS076352_GCF_002565895.1	Firmicutes	Bacilli	Bacillales	Bacillaceae	Bacillus	r15c1	cyclic-lactone-autoinducer,lanthipeptide-class-ii	NZ_NUYV01000015.region001.gbk	149864	177853	27990	30	149863	170575	Bacillus_cereus_AFS076352_GCF_002565895.1__r15c1__ctg15_184	Bacillus_cereus_AFS076352_GCF_002565895.1__r15c1__ctg15_183		GCF_002565895.1/NZ_NUYV01000015.region001_13 # 10001 # 10141 # -1 # ID=14476_13;partial=00;start_type=ATG;rbs_motif=AGGAG;rbs_spacer=5-10bp;gc_cont=0.305	Y
Bacillus_cereus_AFS093598_GCF_002553185.1	Firmicutes	Bacilli	Bacillales	Bacillaceae	Bacillus	r53c1	LAP,cyclic-lactone-autoinducer,thiopeptide	NZ_NVMO01000008.region001.gbk	1	21517	21517	20	2765	21517	Bacillus_cereus_AFS093598_GCF_002553185.1__r53c1__ctg53_12	Bacillus_cereus_AFS093598_GCF_002553185.1__r53c1__ctg53_13		GCF_002553185.1/NZ_NVMO01000008.region001_13 # 13397 # 13546 # 1 # ID=14477_13;partial=00;start_type=ATG;rbs_motif=AGxAG;rbs_spacer=5-10bp;gc_cont=0.367	Y
Bacillus_cereus_AH1272_GCF_000161395.1	Firmicutes	Bacilli	Bacillales	Bacillaceae	Bacillus	r1c9	cyclic-lactone-autoinducer,lanthipeptide-class-ii	NZ_CM000740.1.region009.gbk	5635616	5663706	28091	30	5635615	5656327	Bacillus_cereus_AH1272_GCF_000161395.1__r1c9__ctg1_5906	Bacillus_cereus_AH1272_GCF_000161395.1__r1c9__ctg1_5905		GCF_000161395.1/NZ_CM000740.1.region009_12 # 10001 # 10141 # -1 # ID=14489_12;partial=00;start_type=ATG;rbs_motif=AGGAG;rbs_spacer=5-10bp;gc_cont=0.305	Y
Bacillus_cereus_AH1273_GCF_000003955.1	Firmicutes	Bacilli	Bacillales	Bacillaceae	Bacillus	r1c8	cyclic-lactone-autoinducer	NZ_CM000741.1.region008.gbk	5171173	5191884	20712	18	5171172	5191884	Bacillus_cereus_AH1273_GCF_000003955.1__r1c8__ctg1_5373	Bacillus_cereus_AH1273_GCF_000003955.1__r1c8__ctg1_5374		GCF_000003955.1/NZ_CM000741.1.region008_10 # 10572 # 10712 # 1 # ID=14502_10;partial=00;start_type=ATG;rbs_motif=AGGAG;rbs_spacer=5-10bp;gc_cont=0.305	Y
Bacillus_cereus_BC-AK_GCF_002117465.1	Firmicutes	Bacilli	Bacillales	Bacillaceae	Bacillus	r1c1	LAP,cyclic-lactone-autoinducer,thiopeptide	NZ_CP020937.1.region001.gbk	521530	553855	32326	27	533074	553855	Bacillus_cereus_BC-AK_GCF_002117465.1__r1c1__ctg1_493	Bacillus_cereus_BC-AK_GCF_002117465.1__r1c1__ctg1_494		GCF_002117465.1/NZ_CP020937.1.region001_24 # 22177 # 22326 # 1 # ID=14723_24;partial=00;start_type=ATG;rbs_motif=AGxAG;rbs_spacer=5-10bp;gc_cont=0.373	Y
Bacillus_cereus_BcFL2013_GCF_000688755.1	Firmicutes	Bacilli	Bacillales	Bacillaceae	Bacillus	r13c1	LAP,cyclic-lactone-autoinducer,thiopeptide	NZ_JHQN01000015.region001.gbk	1	23615	23615	19	2834	23615	Bacillus_cereus_BcFL2013_GCF_000688755.1__r13c1__ctg13_13	Bacillus_cereus_BcFL2013_GCF_000688755.1__r13c1__ctg13_14		GCF_000688755.1/NZ_JHQN01000015.region001_13 # 13466 # 13615 # 1 # ID=18948_13;partial=00;start_type=ATG;rbs_motif=AGxAG;rbs_spacer=5-10bp;gc_cont=0.373	Y
Bacillus_cereus_DE0191_GCF_007678085.1	Firmicutes	Bacilli	Bacillales	Bacillaceae	Bacillus	r15c1	cyclic-lactone-autoinducer,lanthipeptide-class-iii	NZ_VEDW01000003.region001.gbk	267329	293218	25890	28	272434	293218	Bacillus_cereus_DE0191_GCF_007678085.1__r15c1__ctg15_281	Bacillus_cereus_DE0191_GCF_007678085.1__r15c1__ctg15_282		GCF_007678085.1/NZ_VEDW01000003.region001_19 # 15714 # 15890 # 1 # ID=19429_19;partial=00;start_type=ATG;rbs_motif=None;rbs_spacer=None;gc_cont=0.311	Y
Bacillus_cereus_DE0595_GCF_007665505.1	Firmicutes	Bacilli	Bacillales	Bacillaceae	Bacillus	r34c1	LAP,cyclic-lactone-autoinducer,thiopeptide	NZ_VDNI01000007.region001.gbk	22360	54541	32182	24	33902	54541	Bacillus_cereus_DE0595_GCF_007665505.1__r34c1__ctg34_45			GCF_007665505.1/NZ_VDNI01000007.region001_21 # 22175 # 22324 # 1 # ID=19749_21;partial=00;start_type=ATG;rbs_motif=AGxAG;rbs_spacer=5-10bp;gc_cont=0.373	Y
Bacillus_cereus_FM1_GCF_000832525.1	Firmicutes	Bacilli	Bacillales	Bacillaceae	Bacillus	r1c10	LAP,cyclic-lactone-autoinducer,thiopeptide	NZ_CP009369.1.region010.gbk	4433684	4466009	32326	26	4433683	4454464	Bacillus_cereus_FM1_GCF_000832525.1__r1c10__ctg1_4521	Bacillus_cereus_FM1_GCF_000832525.1__r1c10__ctg1_4520		GCF_000832525.1/NZ_CP009369.1.region010_6 # 10001 # 10150 # -1 # ID=20367_6;partial=00;start_type=ATG;rbs_motif=AGxAG;rbs_spacer=5-10bp;gc_cont=0.373	Y
Bacillus_cereus_FSL_M8-0117_GCF_001583975.1	Firmicutes	Bacilli	Bacillales	Bacillaceae	Bacillus	r167c1	cyclic-lactone-autoinducer	NZ_LONG01000185.region001.gbk	1	7958	7958	14	0	7958	Bacillus_cereus_FSL_M8-0117_GCF_001583975.1__r167c1__ctg167_7			GCF_001583975.1/NZ_LONG01000185.region001_5 # 2918 # 3040 # -1 # ID=20864_5;partial=00;start_type=ATG;rbs_motif=AGGAG;rbs_spacer=5-10bp;gc_cont=0.309	Y
Bacillus_cereus_G9241_GCF_000832805.1	Firmicutes	Bacilli	Bacillales	Bacillaceae	Bacillus	r1c6	LAP,cyclic-lactone-autoinducer,thiopeptide	NZ_CP009590.1.region006.gbk	1919439	1951764	32326	26	1919438	1940219	Bacillus_cereus_G9241_GCF_000832805.1__r1c6__ctg1_1925	Bacillus_cereus_G9241_GCF_000832805.1__r1c6__ctg1_1924		GCF_000832805.1/NZ_CP009590.1.region006_6 # 10001 # 10150 # -1 # ID=20865_6;partial=00;start_type=ATG;rbs_motif=AGxAG;rbs_spacer=5-10bp;gc_cont=0.373	Y
Bacillus_cereus_GTC2926_GCF_004306995.1	Firmicutes	Bacilli	Bacillales	Bacillaceae	Bacillus	r23c1	cyclic-lactone-autoinducer,lanthipeptide-class-ii	NZ_BIYD01000023.region001.gbk	18630	46619	27990	32	18629	39341	Bacillus_cereus_GTC2926_GCF_004306995.1__r23c1__ctg23_34	Bacillus_cereus_GTC2926_GCF_004306995.1__r23c1__ctg23_33		GCF_004306995.1/NZ_BIYD01000023.region001_14 # 10001 # 10141 # -1 # ID=22011_14;partial=00;start_type=ATG;rbs_motif=AGGAG;rbs_spacer=5-10bp;gc_cont=0.305	Y
Bacillus_cereus_HuA4-10_GCF_000291075.1	Firmicutes	Bacilli	Bacillales	Bacillaceae	Bacillus	r3c1	LAP,cyclic-lactone-autoinducer,thiopeptide	NZ_JH792150.1.region001.gbk	13899	50166	36268	35	13898	34652	Bacillus_cereus_HuA4-10_GCF_000291075.1__r3c1__ctg3_18	Bacillus_cereus_HuA4-10_GCF_000291075.1__r3c1__ctg3_17		GCF_000291075.1/NZ_JH792150.1.region001_10 # 10001 # 10168 # -1 # ID=22028_10;partial=00;start_type=ATG;rbs_motif=AGGAG;rbs_spacer=5-10bp;gc_cont=0.280	Y
Bacillus_cereus_LA2007_GCF_002007005.1	Firmicutes	Bacilli	Bacillales	Bacillaceae	Bacillus	r29c1	LAP,cyclic-lactone-autoinducer,thiopeptide	NZ_MUBB01000029.region001.gbk	1	23693	23693	17	2834	23693	Bacillus_cereus_LA2007_GCF_002007005.1__r29c1__ctg29_11	Bacillus_cereus_LA2007_GCF_002007005.1__r29c1__ctg29_12		GCF_002007005.1/NZ_MUBB01000029.region001_13 # 13544 # 13693 # 1 # ID=22521_13;partial=00;start_type=ATG;rbs_motif=AGxAG;rbs_spacer=5-10bp;gc_cont=0.373	Y
Bacillus_cereus_MOD1_Bc122_GCF_002021385.1	Firmicutes	Bacilli	Bacillales	Bacillaceae	Bacillus	r15c1	LAP,cyclic-lactone-autoinducer,thiopeptide	NZ_MQTE01000022.region001.gbk	180337	203899	23563	17	180336	200975	Bacillus_cereus_MOD1_Bc122_GCF_002021385.1__r15c1__ctg15_161			GCF_002021385.1/NZ_MQTE01000022.region001_6 # 9859 # 10008 # -1 # ID=22937_6;partial=00;start_type=ATG;rbs_motif=AGxAG;rbs_spacer=5-10bp;gc_cont=0.373	Y
Bacillus_cereus_MOD1_Bc217_GCF_002201705.1	Firmicutes	Bacilli	Bacillales	Bacillaceae	Bacillus	r54c1	cyclic-lactone-autoinducer,lanthipeptide-class-ii	NZ_NINI01000009.region001.gbk	56669	84658	27990	33	56668	77380	Bacillus_cereus_MOD1_Bc217_GCF_002201705.1__r54c1__ctg54_69	Bacillus_cereus_MOD1_Bc217_GCF_002201705.1__r54c1__ctg54_68		GCF_002201705.1/NZ_NINI01000009.region001_13 # 10001 # 10141 # -1 # ID=23400_13;partial=00;start_type=ATG;rbs_motif=AGGAG;rbs_spacer=5-10bp;gc_cont=0.291	Y
Bacillus_cereus_MOD1_Bc72_GCF_001913395.1	Firmicutes	Bacilli	Bacillales	Bacillaceae	Bacillus	r1c1	cyclic-lactone-autoinducer,lanthipeptide-class-ii	NZ_MIFM01000001.region001.gbk	56636	84625	27990	32	56635	77347	Bacillus_cereus_MOD1_Bc72_GCF_001913395.1__r1c1__ctg1_69	Bacillus_cereus_MOD1_Bc72_GCF_001913395.1__r1c1__ctg1_68		GCF_001913395.1/NZ_MIFM01000001.region001_13 # 10001 # 10141 # -1 # ID=23858_13;partial=00;start_type=ATG;rbs_motif=AGGAG;rbs_spacer=5-10bp;gc_cont=0.291	Y
Bacillus_cereus_VDM062_GCF_000290655.1	Firmicutes	Bacilli	Bacillales	Bacillaceae	Bacillus	r1c2	cyclic-lactone-autoinducer,lanthipeptide-class-ii	NZ_JH791802.1.region002.gbk	749809	777798	27990	29	757086	777798	Bacillus_cereus_VDM062_GCF_000290655.1__r1c2__ctg1_703	Bacillus_cereus_VDM062_GCF_000290655.1__r1c2__ctg1_704		GCF_000290655.1/NZ_JH791802.1.region002_19 # 17850 # 17990 # 1 # ID=24204_19;partial=00;start_type=ATG;rbs_motif=AGGAG;rbs_spacer=5-10bp;gc_cont=0.305	Y
Bacillus_cytotoxicus_AFSSA_08CEB44bac_GCF_900095655.1	Firmicutes	Bacilli	Bacillales	Bacillaceae	Bacillus	r36c1	cyclic-lactone-autoinducer	NZ_FMIK01000022.region001.gbk	1	11961	11961	12	0	11961	Bacillus_cytotoxicus_AFSSA_08CEB44bac_GCF_900095655.1__r36c1__ctg36_3	Bacillus_cytotoxicus_AFSSA_08CEB44bac_GCF_900095655.1__r36c1__ctg36_4::Bacillus_cytotoxicus_AFSSA_08CEB44bac_GCF_900095655.1__r36c1__ctg36_5		GCF_900095655.1/NZ_FMIK01000022.region001_3 # 1705 # 1818 # 1 # ID=24926_3;partial=00;start_type=ATG;rbs_motif=GGAG/GAGG;rbs_spacer=5-10bp;gc_cont=0.254	Y
Bacillus_cytotoxicus_PDT2.12_GCF_017909235.1	Firmicutes	Bacilli	Bacillales	Bacillaceae	Bacillus	r1c4	LAP,cyclic-lactone-autoinducer,thiopeptide	NZ_CP066185.1.region004.gbk	2680969	2711168	30200	31	2690280	2711168	Bacillus_cytotoxicus_PDT2.12_GCF_017909235.1__r1c4__ctg1_2662	Bacillus_cytotoxicus_PDT2.12_GCF_017909235.1__r1c4__ctg1_2663::Bacillus_cytotoxicus_PDT2.12_GCF_017909235.1__r1c4__ctg1_2664		GCF_017909235.1/NZ_CP066185.1.region004_24 # 19944 # 20057 # 1 # ID=25463_24;partial=00;start_type=ATG;rbs_motif=GGAG/GAGG;rbs_spacer=5-10bp;gc_cont=0.254	Y
Bacillus_cytotoxicus_SM1.1_GCF_017909135.1	Firmicutes	Bacilli	Bacillales	Bacillaceae	Bacillus	r1c9	LAP,cyclic-lactone-autoinducer,thiopeptide	NZ_CP066184.1.region009.gbk	3529983	3559784	29802	29	3529982	3550870	Bacillus_cytotoxicus_SM1.1_GCF_017909135.1__r1c9__ctg1_3528	Bacillus_cytotoxicus_SM1.1_GCF_017909135.1__r1c9__ctg1_3526::Bacillus_cytotoxicus_SM1.1_GCF_017909135.1__r1c9__ctg1_3527		GCF_017909135.1/NZ_CP066184.1.region009_9 # 10001 # 10129 # -1 # ID=25962_9;partial=00;start_type=ATG;rbs_motif=None;rbs_spacer=None;gc_cont=0.271	Y
Bacillus_cytotoxicus_SM2.8_GCF_017909015.1	Firmicutes	Bacilli	Bacillales	Bacillaceae	Bacillus	r1c9	LAP,cyclic-lactone-autoinducer,thiopeptide	NZ_CP066179.1.region009.gbk	3346153	3375954	29802	29	3346152	3367040	Bacillus_cytotoxicus_SM2.8_GCF_017909015.1__r1c9__ctg1_3363	Bacillus_cytotoxicus_SM2.8_GCF_017909015.1__r1c9__ctg1_3361::Bacillus_cytotoxicus_SM2.8_GCF_017909015.1__r1c9__ctg1_3362		GCF_017909015.1/NZ_CP066179.1.region009_9 # 10001 # 10129 # -1 # ID=26181_9;partial=00;start_type=ATG;rbs_motif=None;rbs_spacer=None;gc_cont=0.271	Y
Bacillus_idriensis_Marseille-P2855_GCF_904423835.1	Firmicutes	Bacilli	Bacillales	Bacillaceae	Bacillus	r2c2	cyclic-lactone-autoinducer	c00002_NZ_CAJF...region002.gbk	252141	272877	20737	28	252140	272877	Bacillus_idriensis_Marseille-P2855_GCF_904423835.1__r2c2__ctg2_256	Bacillus_idriensis_Marseille-P2855_GCF_904423835.1__r2c2__ctg2_257		GCF_904423835.1/c00002_NZ_CAJF...region002_15 # 10612 # 10737 # 1 # ID=27088_15;partial=00;start_type=ATG;rbs_motif=GGAG/GAGG;rbs_spacer=5-10bp;gc_cont=0.317	Y
Bacillus_idriensis_Marseille-P783_GCF_904423845.1	Firmicutes	Bacilli	Bacillales	Bacillaceae	Bacillus	r8c1	NRPS,NRPS-like,RRE-containing,RiPP-like,cyclic-lactone-autoinducer,transAT-PKS	c00008_NZ_CAJG...region001.gbk	7075	131218	124144	84	108448	129186	Bacillus_idriensis_Marseille-P783_GCF_904423845.1__r8c1__ctg8_75	Bacillus_idriensis_Marseille-P783_GCF_904423845.1__r8c1__ctg8_74		GCF_904423845.1/c00008_NZ_CAJG...region001_70 # 111375 # 111491 # -1 # ID=27554_70;partial=00;start_type=ATG;rbs_motif=AGGAGG;rbs_spacer=5-10bp;gc_cont=0.342	Y
Bacillus_licheniformis_1001095IJ_161003_G12_GCF_015557885.1	Firmicutes	Bacilli	Bacillales	Bacillaceae	Bacillus	r15c1	cyclic-lactone-autoinducer,lanthipeptide-class-ii	c00015_NZ_JADN...region001.gbk	1	25395	25395	26	0	16760	Bacillus_licheniformis_1001095IJ_161003_G12_GCF_015557885.1__r15c1__ctg15_10	Bacillus_licheniformis_1001095IJ_161003_G12_GCF_015557885.1__r15c1__ctg15_9		GCF_015557885.1/c00015_NZ_JADN...region001_8 # 5999 # 6130 # -1 # ID=27831_8;partial=00;start_type=ATG;rbs_motif=GGA/GAG/AGG;rbs_spacer=5-10bp;gc_cont=0.348	Y
Bacillus_licheniformis_LMG_17338_GCF_007832255.1	Firmicutes	Bacilli	Bacillales	Bacillaceae	Bacillus	r22c1	cyclic-lactone-autoinducer,lanthipeptide-class-ii	NZ_NIMP01000010.region001.gbk	52745	77966	25222	24	61379	77966	Bacillus_licheniformis_LMG_17338_GCF_007832255.1__r22c1__ctg22_84			GCF_007832255.1/NZ_NIMP01000010.region001_17 # 19266 # 19397 # 1 # ID=28338_17;partial=00;start_type=ATG;rbs_motif=GGA/GAG/AGG;rbs_spacer=5-10bp;gc_cont=0.348	Y
Bacillus_licheniformis_LMG_6934_GCF_001507765.1	Firmicutes	Bacilli	Bacillales	Bacillaceae	Bacillus	r15c1	cyclic-lactone-autoinducer,lanthipeptide-class-ii	NZ_AZSZ01000015.region001.gbk	55712	80883	25172	26	64346	80883	Bacillus_licheniformis_LMG_6934_GCF_001507765.1__r15c1__ctg15_88	Bacillus_licheniformis_LMG_6934_GCF_001507765.1__r15c1__ctg15_89		GCF_001507765.1/NZ_AZSZ01000015.region001_17 # 19266 # 19397 # 1 # ID=28763_17;partial=00;start_type=ATG;rbs_motif=GGA/GAG/AGG;rbs_spacer=5-10bp;gc_cont=0.348	Y
Bacillus_licheniformis_LMG_7559_GCF_001507755.1	Firmicutes	Bacilli	Bacillales	Bacillaceae	Bacillus	r9c1	cyclic-lactone-autoinducer,lanthipeptide-class-ii	NZ_AZSX01000009.region001.gbk	55833	81067	25235	26	64467	81067	Bacillus_licheniformis_LMG_7559_GCF_001507755.1__r9c1__ctg9_88	Bacillus_licheniformis_LMG_7559_GCF_001507755.1__r9c1__ctg9_89		GCF_001507755.1/NZ_AZSX01000009.region001_17 # 19266 # 19397 # 1 # ID=29068_17;partial=00;start_type=ATG;rbs_motif=GGA/GAG/AGG;rbs_spacer=5-10bp;gc_cont=0.348	Y
Bacillus_licheniformis_RE1.58_GCF_001876545.1	Firmicutes	Bacilli	Bacillales	Bacillaceae	Bacillus	r170c1	cyclic-lactone-autoinducer,lanthipeptide-class-ii	NZ_LWKC01000211.region001.gbk	1	25414	25414	24	0	16779	Bacillus_licheniformis_RE1.58_GCF_001876545.1__r170c1__ctg170_8			GCF_001876545.1/NZ_LWKC01000211.region001_8 # 6018 # 6149 # -1 # ID=29527_8;partial=00;start_type=ATG;rbs_motif=GGA/GAG/AGG;rbs_spacer=5-10bp;gc_cont=0.348	Y
Bacillus_licheniformis_RE1.59_GCF_001876555.1	Firmicutes	Bacilli	Bacillales	Bacillaceae	Bacillus	r55c1	cyclic-lactone-autoinducer,lanthipeptide-class-ii	NZ_LWKD01000076.region001.gbk	52745	77961	25217	24	61379	77961	Bacillus_licheniformis_RE1.59_GCF_001876555.1__r55c1__ctg55_84			GCF_001876555.1/NZ_LWKD01000076.region001_17 # 19266 # 19397 # 1 # ID=30091_17;partial=00;start_type=ATG;rbs_motif=GGA/GAG/AGG;rbs_spacer=5-10bp;gc_cont=0.348	Y
Bacillus_licheniformis_RE1.60_GCF_001876575.1	Firmicutes	Bacilli	Bacillales	Bacillaceae	Bacillus	r158c1	cyclic-lactone-autoinducer,lanthipeptide-class-ii	NZ_LWKE01000216.region001.gbk	1	25217	25217	24	0	16582	Bacillus_licheniformis_RE1.60_GCF_001876575.1__r158c1__ctg158_8			GCF_001876575.1/NZ_LWKE01000216.region001_8 # 5821 # 5952 # -1 # ID=30626_8;partial=00;start_type=ATG;rbs_motif=GGA/GAG/AGG;rbs_spacer=5-10bp;gc_cont=0.348	Y
Bacillus_licheniformis_RE1.61_GCF_001876655.1	Firmicutes	Bacilli	Bacillales	Bacillaceae	Bacillus	r112c1	cyclic-lactone-autoinducer,lanthipeptide-class-ii	NZ_LWKF01000145.region001.gbk	1	19423	19423	17	0	10788	Bacillus_licheniformis_RE1.61_GCF_001876655.1__r112c1__ctg112_1			GCF_001876655.1/NZ_LWKF01000145.region001_1 # 27 # 158 # -1 # ID=31092_1;partial=00;start_type=ATG;rbs_motif=GGA/GAG/AGG;rbs_spacer=5-10bp;gc_cont=0.348	Y
Bacillus_licheniformis_RE1.61_GCF_001876655.1	Firmicutes	Bacilli	Bacillales	Bacillaceae	Bacillus	r35c1	cyclic-lactone-autoinducer	NZ_LWKF01000039.region001.gbk	1	5972	5972	8	0	5972		Bacillus_licheniformis_RE1.61_GCF_001876655.1__r35c1__ctg35_1			Y
Bacillus_licheniformis_SCDB_34_GCF_002074115.1	Firmicutes	Bacilli	Bacillales	Bacillaceae	Bacillus	r1c8	cyclic-lactone-autoinducer,lanthipeptide-class-ii	NZ_CP014793.1.region008.gbk	2962256	2991652	29397	26	2970890	2991652	Bacillus_licheniformis_SCDB_34_GCF_002074115.1__r1c8__ctg1_3141	Bacillus_licheniformis_SCDB_34_GCF_002074115.1__r1c8__ctg1_3142		GCF_002074115.1/NZ_CP014793.1.region008_17 # 19266 # 19397 # 1 # ID=31538_17;partial=00;start_type=ATG;rbs_motif=GGA/GAG/AGG;rbs_spacer=5-10bp;gc_cont=0.348	Y
Bacillus_mojavensis_LDFZ001_GCF_015074845.1	Firmicutes	Bacilli	Bacillales	Bacillaceae	Bacillus	r1c2	cyclic-lactone-autoinducer,lanthipeptide-class-ii	NZ_CP063276.1.region002.gbk	541942	571374	29433	30	541941	562708	Bacillus_mojavensis_LDFZ001_GCF_015074845.1__r1c2__ctg1_513	Bacillus_mojavensis_LDFZ001_GCF_015074845.1__r1c2__ctg1_512		GCF_015074845.1/NZ_CP063276.1.region002_13 # 10001 # 10132 # -1 # ID=32062_13;partial=00;start_type=ATG;rbs_motif=AGGAG;rbs_spacer=5-10bp;gc_cont=0.341	Y
Bacillus_mycoides_59b_GCF_019389855.1	Firmicutes	Bacilli	Bacillales	Bacillaceae	Bacillus	r33c1	cyclic-lactone-autoinducer	NZ_QKKB01000087.region001.gbk	96658	117372	20715	18	96657	117372	Bacillus_mycoides_59b_GCF_019389855.1__r33c1__ctg33_103	Bacillus_mycoides_59b_GCF_019389855.1__r33c1__ctg33_104			Y
Bacillus_mycoides_DB-1_GCF_003386775.1	Firmicutes	Bacilli	Bacillales	Bacillaceae	Bacillus	r40c1	LAP,cyclic-lactone-autoinducer,thiopeptide	NZ_QTTY01000040.region001.gbk	4496	40713	36218	33	4495	25267	Bacillus_mycoides_DB-1_GCF_003386775.1__r40c1__ctg40_14	Bacillus_mycoides_DB-1_GCF_003386775.1__r40c1__ctg40_13			Y
Bacillus_mycoides_DHM125_GCF_015071215.1	Firmicutes	Bacilli	Bacillales	Bacillaceae	Bacillus	r50c1	cyclic-lactone-autoinducer	NZ_VRME01000054.region001.gbk	1	10969	10969	10	0	10969	Bacillus_mycoides_DHM125_GCF_015071215.1__r50c1__ctg50_1	Bacillus_mycoides_DHM125_GCF_015071215.1__r50c1__ctg50_2			Y
Bacillus_paralicheniformis_14DA11_GCF_002393225.1	Firmicutes	Bacilli	Bacillales	Bacillaceae	Bacillus	r1c1	cyclic-lactone-autoinducer,lanthipeptide-class-ii	NZ_CP023168.1.region001.gbk	164730	190629	25900	25	169867	190629	Bacillus_paralicheniformis_14DA11_GCF_002393225.1__r1c1__ctg1_180	Bacillus_paralicheniformis_14DA11_GCF_002393225.1__r1c1__ctg1_181		GCF_002393225.1/NZ_CP023168.1.region001_15 # 15769 # 15900 # 1 # ID=33857_15;partial=00;start_type=ATG;rbs_motif=GGA/GAG/AGG;rbs_spacer=5-10bp;gc_cont=0.348	Y
Bacillus_paralicheniformis_179-K_2B1_HS_GCF_019037005.1	Firmicutes	Bacilli	Bacillales	Bacillaceae	Bacillus	r10c1	cyclic-lactone-autoinducer,lanthipeptide-class-ii	c00010_NZ_JAHH...region001.gbk	1	25241	25241	26	0	16606	Bacillus_paralicheniformis_179-K_2B1_HS_GCF_019037005.1__r10c1__ctg10_9	Bacillus_paralicheniformis_179-K_2B1_HS_GCF_019037005.1__r10c1__ctg10_8		GCF_019037005.1/c00010_NZ_JAHH...region001_8 # 5845 # 5976 # -1 # ID=8_8;partial=00;start_type=ATG;rbs_motif=GGA/GAG/AGG;rbs_spacer=5-10bp;gc_cont=0.348	Y
Bacillus_paralicheniformis_179-K_3C1_HS_GCF_019036955.1	Firmicutes	Bacilli	Bacillales	Bacillaceae	Bacillus	r4c1	cyclic-lactone-autoinducer,lanthipeptide-class-ii	c00004_NZ_JAHH...region001.gbk	56014	81316	25303	26	64648	81316	Bacillus_paralicheniformis_179-K_3C1_HS_GCF_019036955.1__r4c1__ctg4_88	Bacillus_paralicheniformis_179-K_3C1_HS_GCF_019036955.1__r4c1__ctg4_89		GCF_019036955.1/c00004_NZ_JAHH...region001_17 # 19266 # 19397 # 1 # ID=9_17;partial=00;start_type=ATG;rbs_motif=GGA/GAG/AGG;rbs_spacer=5-10bp;gc_cont=0.348	Y
Bacillus_paralicheniformis_179-K_9B1_HS_GCF_019037035.1	Firmicutes	Bacilli	Bacillales	Bacillaceae	Bacillus	r9c1	cyclic-lactone-autoinducer,lanthipeptide-class-ii	c00009_NZ_JAHH...region001.gbk	55768	81008	25241	26	64402	81008	Bacillus_paralicheniformis_179-K_9B1_HS_GCF_019037035.1__r9c1__ctg9_89	Bacillus_paralicheniformis_179-K_9B1_HS_GCF_019037035.1__r9c1__ctg9_90		GCF_019037035.1/c00009_NZ_JAHH...region001_17 # 19266 # 19397 # 1 # ID=30_17;partial=00;start_type=ATG;rbs_motif=GGA/GAG/AGG;rbs_spacer=5-10bp;gc_cont=0.348	Y
Bacillus_paralicheniformis_6-1_GCF_009935615.1	Firmicutes	Bacilli	Bacillales	Bacillaceae	Bacillus	r9c1	cyclic-lactone-autoinducer,lanthipeptide-class-ii	NZ_NKBD01000017.region001.gbk	1	25361	25361	26	0	16726	Bacillus_paralicheniformis_6-1_GCF_009935615.1__r9c1__ctg9_9	Bacillus_paralicheniformis_6-1_GCF_009935615.1__r9c1__ctg9_8		GCF_009935615.1/NZ_NKBD01000017.region001_8 # 5965 # 6096 # -1 # ID=31_8;partial=00;start_type=ATG;rbs_motif=GGA/GAG/AGG;rbs_spacer=5-10bp;gc_cont=0.348	Y
Bacillus_paralicheniformis_7510_GCF_002272155.1	Firmicutes	Bacilli	Bacillales	Bacillaceae	Bacillus	r73c1	cyclic-lactone-autoinducer,lanthipeptide-class-ii	NZ_NPMO01000078.region001.gbk	156	25319	25164	31	8814	25319	Bacillus_paralicheniformis_7510_GCF_002272155.1__r73c1__ctg73_22	Bacillus_paralicheniformis_7510_GCF_002272155.1__r73c1__ctg73_23		GCF_002272155.1/NZ_NPMO01000078.region001_17 # 19266 # 19397 # 1 # ID=43_17;partial=00;start_type=ATG;rbs_motif=GGA/GAG/AGG;rbs_spacer=5-10bp;gc_cont=0.348	Y
Bacillus_paralicheniformis_9-1_GCF_009935535.1	Firmicutes	Bacilli	Bacillales	Bacillaceae	Bacillus	r1c1	cyclic-lactone-autoinducer,lanthipeptide-class-ii	NZ_NKBC01000001.region001.gbk	1	25468	25468	26	0	16833	Bacillus_paralicheniformis_9-1_GCF_009935535.1__r1c1__ctg1_9	Bacillus_paralicheniformis_9-1_GCF_009935535.1__r1c1__ctg1_8		GCF_009935535.1/NZ_NKBC01000001.region001_8 # 6072 # 6203 # -1 # ID=72_8;partial=00;start_type=ATG;rbs_motif=GGA/GAG/AGG;rbs_spacer=5-10bp;gc_cont=0.348	Y
Bacillus_paralicheniformis_A4-3_GCF_008365255.1	Firmicutes	Bacilli	Bacillales	Bacillaceae	Bacillus	r1c4	cyclic-lactone-autoinducer,lanthipeptide-class-ii	NZ_CP043501.1.region004.gbk	1340917	1370313	29397	27	1349551	1370313	Bacillus_paralicheniformis_A4-3_GCF_008365255.1__r1c4__ctg1_1336	Bacillus_paralicheniformis_A4-3_GCF_008365255.1__r1c4__ctg1_1337		GCF_008365255.1/NZ_CP043501.1.region004_17 # 19266 # 19397 # 1 # ID=73_17;partial=00;start_type=ATG;rbs_motif=GGA/GAG/AGG;rbs_spacer=5-10bp;gc_cont=0.348	Y
Bacillus_paralicheniformis_APC1576_GCF_001691735.1	Firmicutes	Bacilli	Bacillales	Bacillaceae	Bacillus	r7c1	cyclic-lactone-autoinducer,lanthipeptide-class-ii	NZ_LXPD01000001.region001.gbk	1	25470	25470	26	0	16835	Bacillus_paralicheniformis_APC1576_GCF_001691735.1__r7c1__ctg7_9	Bacillus_paralicheniformis_APC1576_GCF_001691735.1__r7c1__ctg7_8		GCF_001691735.1/NZ_LXPD01000001.region001_8 # 6074 # 6205 # -1 # ID=74_8;partial=00;start_type=ATG;rbs_motif=GGA/GAG/AGG;rbs_spacer=5-10bp;gc_cont=0.348	Y
Bacillus_paralicheniformis_ATCC_12759_GCF_000746885.1	Firmicutes	Bacilli	Bacillales	Bacillaceae	Bacillus	r1c2	cyclic-lactone-autoinducer,lanthipeptide-class-ii	NZ_KN125579.1.region002.gbk	741049	770445	29397	29	749683	770445	Bacillus_paralicheniformis_ATCC_12759_GCF_000746885.1__r1c2__ctg1_727	Bacillus_paralicheniformis_ATCC_12759_GCF_000746885.1__r1c2__ctg1_728		GCF_000746885.1/NZ_KN125579.1.region002_17 # 19266 # 19397 # 1 # ID=118_17;partial=00;start_type=ATG;rbs_motif=GGA/GAG/AGG;rbs_spacer=5-10bp;gc_cont=0.348	Y
Bacillus_paralicheniformis_ATCC_9945a_GCF_000408885.1	Firmicutes	Bacilli	Bacillales	Bacillaceae	Bacillus	r1c1	cyclic-lactone-autoinducer,lanthipeptide-class-ii	NC_021362.1.region001.gbk	155299	184695	29397	27	163933	184695	Bacillus_paralicheniformis_ATCC_9945a_GCF_000408885.1__r1c1__ctg1_176	Bacillus_paralicheniformis_ATCC_9945a_GCF_000408885.1__r1c1__ctg1_177		GCF_000408885.1/NC_021362.1.region001_17 # 19266 # 19397 # 1 # ID=2006_17;partial=00;start_type=ATG;rbs_motif=GGA/GAG/AGG;rbs_spacer=5-10bp;gc_cont=0.348	Y
Bacillus_paralicheniformis_B4123_GCF_001925035.1	Firmicutes	Bacilli	Bacillales	Bacillaceae	Bacillus	r19c1	cyclic-lactone-autoinducer,lanthipeptide-class-ii	NZ_LKPP01000125.region001.gbk	35719	65115	29397	27	44353	65115	Bacillus_paralicheniformis_B4123_GCF_001925035.1__r19c1__ctg19_67	Bacillus_paralicheniformis_B4123_GCF_001925035.1__r19c1__ctg19_68		GCF_001925035.1/NZ_LKPP01000125.region001_17 # 19266 # 19397 # 1 # ID=4702_17;partial=00;start_type=ATG;rbs_motif=GGA/GAG/AGG;rbs_spacer=5-10bp;gc_cont=0.348	Y
Bacillus_paralicheniformis_B4125_GCF_001925105.1	Firmicutes	Bacilli	Bacillales	Bacillaceae	Bacillus	r10c1	cyclic-lactone-autoinducer,lanthipeptide-class-ii	NZ_LKPR01000009.region001.gbk	56267	82058	25792	26	64901	82058	Bacillus_paralicheniformis_B4125_GCF_001925105.1__r10c1__ctg10_88	Bacillus_paralicheniformis_B4125_GCF_001925105.1__r10c1__ctg10_89		GCF_001925105.1/NZ_LKPR01000009.region001_17 # 19266 # 19397 # 1 # ID=4703_17;partial=00;start_type=ATG;rbs_motif=GGA/GAG/AGG;rbs_spacer=5-10bp;gc_cont=0.348	Y
Bacillus_paralicheniformis_BAC-12620_GCF_007994395.1	Firmicutes	Bacilli	Bacillales	Bacillaceae	Bacillus	r3c1	cyclic-lactone-autoinducer,lanthipeptide-class-ii	NZ_NIND01000013.region001.gbk	55711	80894	25184	26	64345	80894	Bacillus_paralicheniformis_BAC-12620_GCF_007994395.1__r3c1__ctg3_88	Bacillus_paralicheniformis_BAC-12620_GCF_007994395.1__r3c1__ctg3_89		GCF_007994395.1/NZ_NIND01000013.region001_17 # 19266 # 19397 # 1 # ID=4710_17;partial=00;start_type=ATG;rbs_motif=GGA/GAG/AGG;rbs_spacer=5-10bp;gc_cont=0.348	Y
Bacillus_paralicheniformis_BAC-14817_GCF_007832305.1	Firmicutes	Bacilli	Bacillales	Bacillaceae	Bacillus	r6c1	cyclic-lactone-autoinducer,lanthipeptide-class-ii	NZ_NIMC01000010.region001.gbk	1	16796	16796	16	247	16796	Bacillus_paralicheniformis_BAC-14817_GCF_007832305.1__r6c1__ctg6_7	Bacillus_paralicheniformis_BAC-14817_GCF_007832305.1__r6c1__ctg6_8		GCF_007832305.1/NZ_NIMC01000010.region001_7 # 10878 # 11009 # 1 # ID=4711_7;partial=00;start_type=ATG;rbs_motif=GGA/GAG/AGG;rbs_spacer=5-10bp;gc_cont=0.348	Y
Bacillus_paralicheniformis_BAC-14820_GCF_007831895.1	Firmicutes	Bacilli	Bacillales	Bacillaceae	Bacillus	r43c1	cyclic-lactone-autoinducer,lanthipeptide-class-ii	NZ_NILZ01000046.region001.gbk	1	16785	16785	16	0	16538	Bacillus_paralicheniformis_BAC-14820_GCF_007831895.1__r43c1__ctg43_9	Bacillus_paralicheniformis_BAC-14820_GCF_007831895.1__r43c1__ctg43_8		GCF_007831895.1/NZ_NILZ01000046.region001_8 # 5777 # 5908 # -1 # ID=4723_8;partial=00;start_type=ATG;rbs_motif=GGA/GAG/AGG;rbs_spacer=5-10bp;gc_cont=0.348	Y
Bacillus_paralicheniformis_BAC-15136_GCF_007831845.1	Firmicutes	Bacilli	Bacillales	Bacillaceae	Bacillus	r41c1	cyclic-lactone-autoinducer,lanthipeptide-class-ii	NZ_NILU01000060.region001.gbk	1	16796	16796	16	247	16796	Bacillus_paralicheniformis_BAC-15136_GCF_007831845.1__r41c1__ctg41_7	Bacillus_paralicheniformis_BAC-15136_GCF_007831845.1__r41c1__ctg41_8		GCF_007831845.1/NZ_NILU01000060.region001_7 # 10878 # 11009 # 1 # ID=4724_7;partial=00;start_type=ATG;rbs_motif=GGA/GAG/AGG;rbs_spacer=5-10bp;gc_cont=0.348	Y
Bacillus_paralicheniformis_BAC-15332_GCF_007831595.1	Firmicutes	Bacilli	Bacillales	Bacillaceae	Bacillus	r5c1	cyclic-lactone-autoinducer,lanthipeptide-class-ii	NZ_NILI01000019.region001.gbk	55811	80983	25173	25	64445	80983	Bacillus_paralicheniformis_BAC-15332_GCF_007831595.1__r5c1__ctg5_88			GCF_007831595.1/NZ_NILI01000019.region001_17 # 19266 # 19397 # 1 # ID=4786_17;partial=00;start_type=ATG;rbs_motif=GGA/GAG/AGG;rbs_spacer=5-10bp;gc_cont=0.348	Y
Bacillus_paralicheniformis_BAC-15337_GCF_007831555.1	Firmicutes	Bacilli	Bacillales	Bacillaceae	Bacillus	r39c1	cyclic-lactone-autoinducer,lanthipeptide-class-ii	NZ_NILG01000025.region001.gbk	55711	81070	25360	26	64345	81070	Bacillus_paralicheniformis_BAC-15337_GCF_007831555.1__r39c1__ctg39_88	Bacillus_paralicheniformis_BAC-15337_GCF_007831555.1__r39c1__ctg39_89		GCF_007831555.1/NZ_NILG01000025.region001_17 # 19266 # 19397 # 1 # ID=4787_17;partial=00;start_type=ATG;rbs_motif=GGA/GAG/AGG;rbs_spacer=5-10bp;gc_cont=0.348	Y
Bacillus_paralicheniformis_BAC-15381_GCF_007831535.1	Firmicutes	Bacilli	Bacillales	Bacillaceae	Bacillus	r50c1	cyclic-lactone-autoinducer,lanthipeptide-class-ii	NZ_NILF01000041.region001.gbk	1	16785	16785	16	0	16538	Bacillus_paralicheniformis_BAC-15381_GCF_007831535.1__r50c1__ctg50_9	Bacillus_paralicheniformis_BAC-15381_GCF_007831535.1__r50c1__ctg50_8		GCF_007831535.1/NZ_NILF01000041.region001_8 # 5777 # 5908 # -1 # ID=5349_8;partial=00;start_type=ATG;rbs_motif=GGA/GAG/AGG;rbs_spacer=5-10bp;gc_cont=0.348	Y
Bacillus_paralicheniformis_BAC-19467_GCF_007831375.1	Firmicutes	Bacilli	Bacillales	Bacillaceae	Bacillus	r37c1	cyclic-lactone-autoinducer,lanthipeptide-class-ii	NZ_NIKZ01000024.region001.gbk	55674	81033	25360	26	64308	81033	Bacillus_paralicheniformis_BAC-19467_GCF_007831375.1__r37c1__ctg37_88	Bacillus_paralicheniformis_BAC-19467_GCF_007831375.1__r37c1__ctg37_89		GCF_007831375.1/NZ_NIKZ01000024.region001_17 # 19266 # 19397 # 1 # ID=9551_17;partial=00;start_type=ATG;rbs_motif=GGA/GAG/AGG;rbs_spacer=5-10bp;gc_cont=0.348	Y
Bacillus_paralicheniformis_BAC-19468_GCF_007831395.1	Firmicutes	Bacilli	Bacillales	Bacillaceae	Bacillus	r22c1	cyclic-lactone-autoinducer,lanthipeptide-class-ii	NZ_NIKY01000005.region001.gbk	55711	81176	25466	26	64345	81176	Bacillus_paralicheniformis_BAC-19468_GCF_007831395.1__r22c1__ctg22_88	Bacillus_paralicheniformis_BAC-19468_GCF_007831395.1__r22c1__ctg22_89		GCF_007831395.1/NZ_NIKY01000005.region001_17 # 19266 # 19397 # 1 # ID=9552_17;partial=00;start_type=ATG;rbs_motif=GGA/GAG/AGG;rbs_spacer=5-10bp;gc_cont=0.348	Y
Bacillus_paralicheniformis_BAC-4186_GCF_007831125.1	Firmicutes	Bacilli	Bacillales	Bacillaceae	Bacillus	r89c1	cyclic-lactone-autoinducer,lanthipeptide-class-ii	NZ_NIJW01000087.region001.gbk	1	25184	25184	29	0	16549	Bacillus_paralicheniformis_BAC-4186_GCF_007831125.1__r89c1__ctg89_9	Bacillus_paralicheniformis_BAC-4186_GCF_007831125.1__r89c1__ctg89_8		GCF_007831125.1/NZ_NIJW01000087.region001_8 # 5788 # 5919 # -1 # ID=9553_8;partial=00;start_type=ATG;rbs_motif=GGA/GAG/AGG;rbs_spacer=5-10bp;gc_cont=0.348	Y
Bacillus_paralicheniformis_BH19_GCF_004296375.1	Firmicutes	Bacilli	Bacillales	Bacillaceae	Bacillus	r25c1	cyclic-lactone-autoinducer,lanthipeptide-class-ii	NZ_PJMD01000027.region001.gbk	56022	81339	25318	26	64656	81339	Bacillus_paralicheniformis_BH19_GCF_004296375.1__r25c1__ctg25_88	Bacillus_paralicheniformis_BH19_GCF_004296375.1__r25c1__ctg25_89		GCF_004296375.1/NZ_PJMD01000027.region001_17 # 19266 # 19397 # 1 # ID=10360_17;partial=00;start_type=ATG;rbs_motif=GGA/GAG/AGG;rbs_spacer=5-10bp;gc_cont=0.348	Y
Bacillus_paralicheniformis_BL-09_GCF_000876525.1	Firmicutes	Bacilli	Bacillales	Bacillaceae	Bacillus	r1c1	cyclic-lactone-autoinducer,lanthipeptide-class-ii	NZ_CP010524.1.region001.gbk	155449	184845	29397	27	164083	184845	Bacillus_paralicheniformis_BL-09_GCF_000876525.1__r1c1__ctg1_177	Bacillus_paralicheniformis_BL-09_GCF_000876525.1__r1c1__ctg1_178		GCF_000876525.1/NZ_CP010524.1.region001_17 # 19266 # 19397 # 1 # ID=10361_17;partial=00;start_type=ATG;rbs_motif=GGA/GAG/AGG;rbs_spacer=5-10bp;gc_cont=0.348	Y
Bacillus_paralicheniformis_CBMAI_1303_GCF_003711025.1	Firmicutes	Bacilli	Bacillales	Bacillaceae	Bacillus	r1c1	cyclic-lactone-autoinducer,lanthipeptide-class-ii	NZ_CP033389.1.region001.gbk	155199	184595	29397	27	163833	184595	Bacillus_paralicheniformis_CBMAI_1303_GCF_003711025.1__r1c1__ctg1_176	Bacillus_paralicheniformis_CBMAI_1303_GCF_003711025.1__r1c1__ctg1_177		GCF_003711025.1/NZ_CP033389.1.region001_17 # 19266 # 19397 # 1 # ID=10362_17;partial=00;start_type=ATG;rbs_motif=GGA/GAG/AGG;rbs_spacer=5-10bp;gc_cont=0.348	Y
Bacillus_paralicheniformis_DSM_11259_GCF_007994265.1	Firmicutes	Bacilli	Bacillales	Bacillaceae	Bacillus	r1c1	cyclic-lactone-autoinducer,lanthipeptide-class-ii	NZ_NIKT01000033.region001.gbk	55676	81091	25416	26	64310	81091	Bacillus_paralicheniformis_DSM_11259_GCF_007994265.1__r1c1__ctg1_88	Bacillus_paralicheniformis_DSM_11259_GCF_007994265.1__r1c1__ctg1_89		GCF_007994265.1/NZ_NIKT01000033.region001_17 # 19266 # 19397 # 1 # ID=10363_17;partial=00;start_type=ATG;rbs_motif=GGA/GAG/AGG;rbs_spacer=5-10bp;gc_cont=0.348	Y
Bacillus_paralicheniformis_DSM_12369_GCF_007831315.1	Firmicutes	Bacilli	Bacillales	Bacillaceae	Bacillus	r18c1	cyclic-lactone-autoinducer	NZ_NIKS01000020.region001.gbk	51381	68074	16694	20	51380	68074	Bacillus_paralicheniformis_DSM_12369_GCF_007831315.1__r18c1__ctg18_77	Bacillus_paralicheniformis_DSM_12369_GCF_007831315.1__r18c1__ctg18_78		GCF_007831315.1/NZ_NIKS01000020.region001_16 # 10631 # 10762 # 1 # ID=10378_16;partial=00;start_type=ATG;rbs_motif=GGA/GAG/AGG;rbs_spacer=5-10bp;gc_cont=0.348	Y
Bacillus_paralicheniformis_FA6_GCF_009497935.1	Firmicutes	Bacilli	Bacillales	Bacillaceae	Bacillus	r1c11	cyclic-lactone-autoinducer,lanthipeptide-class-ii	NZ_CP033198.1.region011.gbk	3829610	3859006	29397	27	3829609	3850371	Bacillus_paralicheniformis_FA6_GCF_009497935.1__r1c11__ctg1_3809	Bacillus_paralicheniformis_FA6_GCF_009497935.1__r1c11__ctg1_3808		GCF_009497935.1/NZ_CP033198.1.region011_9 # 10001 # 10132 # -1 # ID=10379_9;partial=00;start_type=ATG;rbs_motif=GGA/GAG/AGG;rbs_spacer=5-10bp;gc_cont=0.348	Y
Bacillus_paralicheniformis_G-1_GCF_000604165.1	Firmicutes	Bacilli	Bacillales	Bacillaceae	Bacillus	r13c1	cyclic-lactone-autoinducer,lanthipeptide-class-ii	NZ_AZSK01000012.region001.gbk	55776	81013	25238	26	64410	81013	Bacillus_paralicheniformis_G-1_GCF_000604165.1__r13c1__ctg13_88	Bacillus_paralicheniformis_G-1_GCF_000604165.1__r13c1__ctg13_89		GCF_000604165.1/NZ_AZSK01000012.region001_17 # 19266 # 19397 # 1 # ID=13568_17;partial=00;start_type=ATG;rbs_motif=GGA/GAG/AGG;rbs_spacer=5-10bp;gc_cont=0.348	Y
Bacillus_paralicheniformis_G1_GCF_007830895.1	Firmicutes	Bacilli	Bacillales	Bacillaceae	Bacillus	r19c1	cyclic-lactone-autoinducer,lanthipeptide-class-ii	NZ_NIJX01000002.region001.gbk	1	25173	25173	26	0	16538	Bacillus_paralicheniformis_G1_GCF_007830895.1__r19c1__ctg19_9	Bacillus_paralicheniformis_G1_GCF_007830895.1__r19c1__ctg19_8		GCF_007830895.1/NZ_NIJX01000002.region001_8 # 5777 # 5908 # -1 # ID=13599_8;partial=00;start_type=ATG;rbs_motif=GGA/GAG/AGG;rbs_spacer=5-10bp;gc_cont=0.348	Y
Bacillus_paralicheniformis_G25-100_GCF_015845295.1	Firmicutes	Bacilli	Bacillales	Bacillaceae	Bacillus	r18c1	cyclic-lactone-autoinducer,lanthipeptide-class-ii	NZ_LDHI01000019.region001.gbk	1	25535	25535	26	0	16900	Bacillus_paralicheniformis_G25-100_GCF_015845295.1__r18c1__ctg18_9	Bacillus_paralicheniformis_G25-100_GCF_015845295.1__r18c1__ctg18_8		GCF_015845295.1/NZ_LDHI01000019.region001_8 # 6139 # 6270 # -1 # ID=13621_8;partial=00;start_type=ATG;rbs_motif=GGA/GAG/AGG;rbs_spacer=5-10bp;gc_cont=0.348	Y
Bacillus_paralicheniformis_J1101004_170508_A4_GCF_015547165.1	Firmicutes	Bacilli	Bacillales	Bacillaceae	Bacillus	r3c1	cyclic-lactone-autoinducer,lanthipeptide-class-ii	c00003_NZ_JADM...region001.gbk	55929	81257	25329	26	64563	81257	Bacillus_paralicheniformis_J1101004_170508_A4_GCF_015547165.1__r3c1__ctg3_88	Bacillus_paralicheniformis_J1101004_170508_A4_GCF_015547165.1__r3c1__ctg3_89		GCF_015547165.1/c00003_NZ_JADM...region001_17 # 19266 # 19397 # 1 # ID=13622_17;partial=00;start_type=ATG;rbs_motif=GGA/GAG/AGG;rbs_spacer=5-10bp;gc_cont=0.348	Y
Bacillus_paralicheniformis_J23TS8_GCF_018332895.1	Firmicutes	Bacilli	Bacillales	Bacillaceae	Bacillus	r5c1	cyclic-lactone-autoinducer,lanthipeptide-class-ii	NZ_BOQY01000005.region001.gbk	55941	81231	25291	26	64575	81231	Bacillus_paralicheniformis_J23TS8_GCF_018332895.1__r5c1__ctg5_88	Bacillus_paralicheniformis_J23TS8_GCF_018332895.1__r5c1__ctg5_89		GCF_018332895.1/NZ_BOQY01000005.region001_17 # 19266 # 19397 # 1 # ID=13623_17;partial=00;start_type=ATG;rbs_motif=GGA/GAG/AGG;rbs_spacer=5-10bp;gc_cont=0.348	Y
Bacillus_paralicheniformis_J25TS1_GCF_018332915.1	Firmicutes	Bacilli	Bacillales	Bacillaceae	Bacillus	r7c1	cyclic-lactone-autoinducer,lanthipeptide-class-ii	NZ_BOQZ01000007.region001.gbk	55900	81202	25303	26	64534	81202	Bacillus_paralicheniformis_J25TS1_GCF_018332915.1__r7c1__ctg7_88	Bacillus_paralicheniformis_J25TS1_GCF_018332915.1__r7c1__ctg7_89		GCF_018332915.1/NZ_BOQZ01000007.region001_17 # 19266 # 19397 # 1 # ID=14427_17;partial=00;start_type=ATG;rbs_motif=GGA/GAG/AGG;rbs_spacer=5-10bp;gc_cont=0.348	Y
Bacillus_paralicheniformis_J36TS2_GCF_018332935.1	Firmicutes	Bacilli	Bacillales	Bacillaceae	Bacillus	r12c1	cyclic-lactone-autoinducer,lanthipeptide-class-ii	NZ_BORA01000012.region001.gbk	1	25573	25573	26	0	16938	Bacillus_paralicheniformis_J36TS2_GCF_018332935.1__r12c1__ctg12_9	Bacillus_paralicheniformis_J36TS2_GCF_018332935.1__r12c1__ctg12_8		GCF_018332935.1/NZ_BORA01000012.region001_8 # 6177 # 6308 # -1 # ID=14478_8;partial=00;start_type=ATG;rbs_motif=GGA/GAG/AGG;rbs_spacer=5-10bp;gc_cont=0.348	Y
Bacillus_paralicheniformis_KJ-16_GCF_001042485.2	Firmicutes	Bacilli	Bacillales	Bacillaceae	Bacillus	r16c1	cyclic-lactone-autoinducer,lanthipeptide-class-ii	NZ_LBMN02000017.region001.gbk	1	25490	25490	27	0	16856	Bacillus_paralicheniformis_KJ-16_GCF_001042485.2__r16c1__ctg16_9	Bacillus_paralicheniformis_KJ-16_GCF_001042485.2__r16c1__ctg16_8		GCF_001042485.2/NZ_LBMN02000017.region001_8 # 6095 # 6226 # -1 # ID=14479_8;partial=00;start_type=ATG;rbs_motif=GGA/GAG/AGG;rbs_spacer=5-10bp;gc_cont=0.348	Y
Bacillus_paralicheniformis_LMG_12248_GCF_007832455.1	Firmicutes	Bacilli	Bacillales	Bacillaceae	Bacillus	r25c1	cyclic-lactone-autoinducer,lanthipeptide-class-ii	NZ_NIMX01000023.region001.gbk	55675	80847	25173	26	64309	80847	Bacillus_paralicheniformis_LMG_12248_GCF_007832455.1__r25c1__ctg25_88	Bacillus_paralicheniformis_LMG_12248_GCF_007832455.1__r25c1__ctg25_89		GCF_007832455.1/NZ_NIMX01000023.region001_17 # 19266 # 19397 # 1 # ID=14480_17;partial=00;start_type=ATG;rbs_motif=GGA/GAG/AGG;rbs_spacer=5-10bp;gc_cont=0.348	Y
Bacillus_paralicheniformis_LMG_6934_GCF_007830945.1	Firmicutes	Bacilli	Bacillales	Bacillaceae	Bacillus	r17c1	cyclic-lactone-autoinducer,lanthipeptide-class-ii	NZ_NIJV01000011.region001.gbk	1	25173	25173	26	0	16538	Bacillus_paralicheniformis_LMG_6934_GCF_007830945.1__r17c1__ctg17_9	Bacillus_paralicheniformis_LMG_6934_GCF_007830945.1__r17c1__ctg17_8		GCF_007830945.1/NZ_NIJV01000011.region001_8 # 5777 # 5908 # -1 # ID=14490_8;partial=00;start_type=ATG;rbs_motif=GGA/GAG/AGG;rbs_spacer=5-10bp;gc_cont=0.348	Y
Bacillus_paralicheniformis_LMG_7559_GCF_007830915.1	Firmicutes	Bacilli	Bacillales	Bacillaceae	Bacillus	r23c1	cyclic-lactone-autoinducer,lanthipeptide-class-ii	NZ_NIJT01000006.region001.gbk	55743	81102	25360	26	64377	81102	Bacillus_paralicheniformis_LMG_7559_GCF_007830915.1__r23c1__ctg23_89	Bacillus_paralicheniformis_LMG_7559_GCF_007830915.1__r23c1__ctg23_90		GCF_007830915.1/NZ_NIJT01000006.region001_17 # 19266 # 19397 # 1 # ID=14503_17;partial=00;start_type=ATG;rbs_motif=GGA/GAG/AGG;rbs_spacer=5-10bp;gc_cont=0.348	Y
Bacillus_paralicheniformis_LMG_7560_GCF_007994205.1	Firmicutes	Bacilli	Bacillales	Bacillaceae	Bacillus	r37c1	cyclic-lactone-autoinducer	NZ_NIJS01000049.region001.gbk	1	9857	9857	12	0	9857	Bacillus_paralicheniformis_LMG_7560_GCF_007994205.1__r37c1__ctg37_9	Bacillus_paralicheniformis_LMG_7560_GCF_007994205.1__r37c1__ctg37_8		GCF_007994205.1/NZ_NIJS01000049.region001_8 # 5777 # 5908 # -1 # ID=14724_8;partial=00;start_type=ATG;rbs_motif=GGA/GAG/AGG;rbs_spacer=5-10bp;gc_cont=0.348	Y
Bacillus_paralicheniformis_LMG_7561_GCF_007830855.1	Firmicutes	Bacilli	Bacillales	Bacillaceae	Bacillus	r47c1	cyclic-lactone-autoinducer	NZ_NIJR01000056.region001.gbk	1	8455	8455	11	0	8455	Bacillus_paralicheniformis_LMG_7561_GCF_007830855.1__r47c1__ctg47_9	Bacillus_paralicheniformis_LMG_7561_GCF_007830855.1__r47c1__ctg47_8		GCF_007830855.1/NZ_NIJR01000056.region001_8 # 5777 # 5908 # -1 # ID=18949_8;partial=00;start_type=ATG;rbs_motif=GGA/GAG/AGG;rbs_spacer=5-10bp;gc_cont=0.348	Y
Bacillus_paralicheniformis_LMG_7633_GCF_007832405.1	Firmicutes	Bacilli	Bacillales	Bacillaceae	Bacillus	r40c1	cyclic-lactone-autoinducer,lanthipeptide-class-ii	NZ_NIMV01000036.region001.gbk	1	25466	25466	27	0	16831	Bacillus_paralicheniformis_LMG_7633_GCF_007832405.1__r40c1__ctg40_9	Bacillus_paralicheniformis_LMG_7633_GCF_007832405.1__r40c1__ctg40_8		GCF_007832405.1/NZ_NIMV01000036.region001_8 # 6070 # 6201 # -1 # ID=19430_8;partial=00;start_type=ATG;rbs_motif=GGA/GAG/AGG;rbs_spacer=5-10bp;gc_cont=0.348	Y
Bacillus_paralicheniformis_MDJK30_GCF_002068155.1	Firmicutes	Bacilli	Bacillales	Bacillaceae	Bacillus	r1c1	cyclic-lactone-autoinducer,lanthipeptide-class-ii	NZ_CP020352.1.region001.gbk	161176	190572	29397	27	169810	190572	Bacillus_paralicheniformis_MDJK30_GCF_002068155.1__r1c1__ctg1_177	Bacillus_paralicheniformis_MDJK30_GCF_002068155.1__r1c1__ctg1_178		GCF_002068155.1/NZ_CP020352.1.region001_17 # 19266 # 19397 # 1 # ID=19750_17;partial=00;start_type=ATG;rbs_motif=GGA/GAG/AGG;rbs_spacer=5-10bp;gc_cont=0.348	Y
Bacillus_paralicheniformis_MGYG-HGUT-00147_GCF_902363785.1	Firmicutes	Bacilli	Bacillales	Bacillaceae	Bacillus	r12c1	cyclic-lactone-autoinducer,lanthipeptide-class-ii	c00012_NZ_CABJ...region001.gbk	1	25977	25977	26	0	17342	Bacillus_paralicheniformis_MGYG-HGUT-00147_GCF_902363785.1__r12c1__ctg12_9	Bacillus_paralicheniformis_MGYG-HGUT-00147_GCF_902363785.1__r12c1__ctg12_8		GCF_902363785.1/c00012_NZ_CABJ...region001_8 # 6581 # 6712 # -1 # ID=20368_8;partial=00;start_type=ATG;rbs_motif=GGA/GAG/AGG;rbs_spacer=5-10bp;gc_cont=0.348	Y
Bacillus_paralicheniformis_N28_GCF_018917315.1	Firmicutes	Bacilli	Bacillales	Bacillaceae	Bacillus	r6c1	cyclic-lactone-autoinducer,lanthipeptide-class-ii	c00006_NZ_JAHL...region001.gbk	55942	81403	25462	26	64576	81403	Bacillus_paralicheniformis_N28_GCF_018917315.1__r6c1__ctg6_88	Bacillus_paralicheniformis_N28_GCF_018917315.1__r6c1__ctg6_89		GCF_018917315.1/c00006_NZ_JAHL...region001_17 # 19266 # 19397 # 1 # ID=20866_17;partial=00;start_type=ATG;rbs_motif=GGA/GAG/AGG;rbs_spacer=5-10bp;gc_cont=0.348	Y
Bacillus_paralicheniformis_NCIMB_11709_GCF_007832535.1	Firmicutes	Bacilli	Bacillales	Bacillaceae	Bacillus	r71c1	cyclic-lactone-autoinducer	NZ_NINC01000113.region001.gbk	1	8195	8195	10	0	8195	Bacillus_paralicheniformis_NCIMB_11709_GCF_007832535.1__r71c1__ctg71_2	Bacillus_paralicheniformis_NCIMB_11709_GCF_007832535.1__r71c1__ctg71_3		GCF_007832535.1/NZ_NINC01000113.region001_3 # 2188 # 2319 # 1 # ID=20867_3;partial=00;start_type=ATG;rbs_motif=GGA/GAG/AGG;rbs_spacer=5-10bp;gc_cont=0.348	Y
Bacillus_paralicheniformis_NCTC_2120_GCF_007832075.1	Firmicutes	Bacilli	Bacillales	Bacillaceae	Bacillus	r1c1	cyclic-lactone-autoinducer,lanthipeptide-class-ii	NZ_NJHE01000023.region001.gbk	55712	80884	25173	26	64346	80884	Bacillus_paralicheniformis_NCTC_2120_GCF_007832075.1__r1c1__ctg1_88	Bacillus_paralicheniformis_NCTC_2120_GCF_007832075.1__r1c1__ctg1_89		GCF_007832075.1/NZ_NJHE01000023.region001_17 # 19266 # 19397 # 1 # ID=22012_17;partial=00;start_type=ATG;rbs_motif=GGA/GAG/AGG;rbs_spacer=5-10bp;gc_cont=0.348	Y
Bacillus_paralicheniformis_NCTC_7589_GCF_007994475.1	Firmicutes	Bacilli	Bacillales	Bacillaceae	Bacillus	r19c1	cyclic-lactone-autoinducer,lanthipeptide-class-ii	NZ_NJHC01000017.region001.gbk	55713	80885	25173	26	64347	80885	Bacillus_paralicheniformis_NCTC_7589_GCF_007994475.1__r19c1__ctg19_88	Bacillus_paralicheniformis_NCTC_7589_GCF_007994475.1__r19c1__ctg19_89		GCF_007994475.1/NZ_NJHC01000017.region001_17 # 19266 # 19397 # 1 # ID=22029_17;partial=00;start_type=ATG;rbs_motif=GGA/GAG/AGG;rbs_spacer=5-10bp;gc_cont=0.348	Y
Bacillus_paralicheniformis_NCTC_8721_GCF_007832015.1	Firmicutes	Bacilli	Bacillales	Bacillaceae	Bacillus	r3c1	cyclic-lactone-autoinducer,lanthipeptide-class-ii	NZ_NJHB01000009.region001.gbk	55711	80889	25179	24	64345	80889	Bacillus_paralicheniformis_NCTC_8721_GCF_007832015.1__r3c1__ctg3_88			GCF_007832015.1/NZ_NJHB01000009.region001_17 # 19266 # 19397 # 1 # ID=22522_17;partial=00;start_type=ATG;rbs_motif=GGA/GAG/AGG;rbs_spacer=5-10bp;gc_cont=0.348	Y
Bacillus_paralicheniformis_NCTC_962_GCF_007831955.1	Firmicutes	Bacilli	Bacillales	Bacillaceae	Bacillus	r12c1	cyclic-lactone-autoinducer,lanthipeptide-class-ii	NZ_NJHA01000002.region001.gbk	55712	80884	25173	26	64346	80884	Bacillus_paralicheniformis_NCTC_962_GCF_007831955.1__r12c1__ctg12_88	Bacillus_paralicheniformis_NCTC_962_GCF_007831955.1__r12c1__ctg12_89		GCF_007831955.1/NZ_NJHA01000002.region001_17 # 19266 # 19397 # 1 # ID=22938_17;partial=00;start_type=ATG;rbs_motif=GGA/GAG/AGG;rbs_spacer=5-10bp;gc_cont=0.348	Y
Bacillus_paralicheniformis_NCTC8721_GCF_900635765.1	Firmicutes	Bacilli	Bacillales	Bacillaceae	Bacillus	r1c1	cyclic-lactone-autoinducer,lanthipeptide-class-ii	NZ_LR134165.1.region001.gbk	161202	190598	29397	28	169836	190598	Bacillus_paralicheniformis_NCTC8721_GCF_900635765.1__r1c1__ctg1_178	Bacillus_paralicheniformis_NCTC8721_GCF_900635765.1__r1c1__ctg1_179		GCF_900635765.1/NZ_LR134165.1.region001_17 # 19266 # 19397 # 1 # ID=23401_17;partial=00;start_type=ATG;rbs_motif=GGA/GAG/AGG;rbs_spacer=5-10bp;gc_cont=0.348	Y
Bacillus_paralicheniformis_NMSW12_GCF_002998255.1	Firmicutes	Bacilli	Bacillales	Bacillaceae	Bacillus	r7c1	cyclic-lactone-autoinducer,lanthipeptide-class-ii	NZ_PVQR01000016.region001.gbk	55850	81319	25470	27	64484	81319	Bacillus_paralicheniformis_NMSW12_GCF_002998255.1__r7c1__ctg7_88	Bacillus_paralicheniformis_NMSW12_GCF_002998255.1__r7c1__ctg7_89		GCF_002998255.1/NZ_PVQR01000016.region001_17 # 19266 # 19397 # 1 # ID=24205_17;partial=00;start_type=ATG;rbs_motif=GGA/GAG/AGG;rbs_spacer=5-10bp;gc_cont=0.348	Y
Bacillus_paralicheniformis_NVH_1112_GCF_007831185.1	Firmicutes	Bacilli	Bacillales	Bacillaceae	Bacillus	r4c1	cyclic-lactone-autoinducer,lanthipeptide-class-ii	NZ_NIKL01000035.region001.gbk	1	25205	25205	26	0	16570	Bacillus_paralicheniformis_NVH_1112_GCF_007831185.1__r4c1__ctg4_9	Bacillus_paralicheniformis_NVH_1112_GCF_007831185.1__r4c1__ctg4_8		GCF_007831185.1/NZ_NIKL01000035.region001_8 # 5809 # 5940 # -1 # ID=24206_8;partial=00;start_type=ATG;rbs_motif=GGA/GAG/AGG;rbs_spacer=5-10bp;gc_cont=0.348	Y
Bacillus_paralicheniformis_S127_GCF_001188525.1	Firmicutes	Bacilli	Bacillales	Bacillaceae	Bacillus	r7c1	cyclic-lactone-autoinducer,lanthipeptide-class-ii	NZ_LFIM01000015.region001.gbk	1	25688	25688	26	0	17053	Bacillus_paralicheniformis_S127_GCF_001188525.1__r7c1__ctg7_9	Bacillus_paralicheniformis_S127_GCF_001188525.1__r7c1__ctg7_8		GCF_001188525.1/NZ_LFIM01000015.region001_8 # 6292 # 6423 # -1 # ID=24927_8;partial=00;start_type=ATG;rbs_motif=GGA/GAG/AGG;rbs_spacer=5-10bp;gc_cont=0.348	Y
Bacillus_paralicheniformis_TRQ65_GCF_007113895.2	Firmicutes	Bacilli	Bacillales	Bacillaceae	Bacillus	r2c1	cyclic-lactone-autoinducer,lanthipeptide-class-ii	NZ_SAZD02000011.region001.gbk	56011	81291	25281	26	64645	81291	Bacillus_paralicheniformis_TRQ65_GCF_007113895.2__r2c1__ctg2_89	Bacillus_paralicheniformis_TRQ65_GCF_007113895.2__r2c1__ctg2_90		GCF_007113895.2/NZ_SAZD02000011.region001_17 # 19266 # 19397 # 1 # ID=25464_17;partial=00;start_type=ATG;rbs_motif=GGA/GAG/AGG;rbs_spacer=5-10bp;gc_cont=0.348	Y
Bacillus_paralicheniformis_UBBLI-30_GCF_005047705.1	Firmicutes	Bacilli	Bacillales	Bacillaceae	Bacillus	r7c1	cyclic-lactone-autoinducer,lanthipeptide-class-ii	NZ_SULF01000015.region001.gbk	1	25303	25303	26	0	16668	Bacillus_paralicheniformis_UBBLI-30_GCF_005047705.1__r7c1__ctg7_9	Bacillus_paralicheniformis_UBBLI-30_GCF_005047705.1__r7c1__ctg7_8		GCF_005047705.1/NZ_SULF01000015.region001_8 # 5907 # 6038 # -1 # ID=25963_8;partial=00;start_type=ATG;rbs_motif=GGA/GAG/AGG;rbs_spacer=5-10bp;gc_cont=0.348	Y
Bacillus_paramycoides_LB_RP2_GCF_013391375.1	Firmicutes	Bacilli	Bacillales	Bacillaceae	Bacillus	r25c1	cyclic-lactone-autoinducer,lanthipeptide-class-ii	c00025_NZ_JACA...region001.gbk	1	18154	18154	23	0	18154	Bacillus_paramycoides_LB_RP2_GCF_013391375.1__r25c1__ctg25_6	Bacillus_paramycoides_LB_RP2_GCF_013391375.1__r25c1__ctg25_7		GCF_013391375.1/c00025_NZ_JACA...region001_6 # 8014 # 8154 # 1 # ID=26178_6;partial=00;start_type=ATG;rbs_motif=AGGAG;rbs_spacer=5-10bp;gc_cont=0.319	Y
Bacillus_pseudomycoides_AFS090198_GCF_002551005.1	Firmicutes	Bacilli	Bacillales	Bacillaceae	Bacillus	r56c1	cyclic-lactone-autoinducer	NZ_NVOY01000058.region001.gbk	30436	50768	20333	21	30435	50768	Bacillus_pseudomycoides_AFS090198_GCF_002551005.1__r56c1__ctg56_38				N
Bacillus_smithii_7_3_47FAA_GCF_000238675.1	Firmicutes	Bacilli	Bacillales	Bacillaceae	Bacillus	r14c1	cyclic-lactone-autoinducer	NZ_JH414751.1.region001.gbk	46292	66988	20697	22	46291	66988	Bacillus_smithii_7_3_47FAA_GCF_000238675.1__r14c1__ctg14_53	Bacillus_smithii_7_3_47FAA_GCF_000238675.1__r14c1__ctg14_54			Y
Bacillus_smithii_DSM_4216_GCF_001050115.1	Firmicutes	Bacilli	Bacillales	Bacillaceae	Bacillus	r1c1	cyclic-lactone-autoinducer	NZ_CP012024.1.region001.gbk	596161	616857	20697	21	596160	616857	Bacillus_smithii_DSM_4216_GCF_001050115.1__r1c1__ctg1_550	Bacillus_smithii_DSM_4216_GCF_001050115.1__r1c1__ctg1_549			Y
Bacillus_smithii_MGYG-HGUT-01390_GCF_902374505.1	Firmicutes	Bacilli	Bacillales	Bacillaceae	Bacillus	r14c1	cyclic-lactone-autoinducer	c00014_NZ_CABK...region001.gbk	46292	66988	20697	22	46291	66988	Bacillus_smithii_MGYG-HGUT-01390_GCF_902374505.1__r14c1__ctg14_53	Bacillus_smithii_MGYG-HGUT-01390_GCF_902374505.1__r14c1__ctg14_54			Y
Bacillus_smithii_NBRC_15311_GCF_001591985.1	Firmicutes	Bacilli	Bacillales	Bacillaceae	Bacillus	r3c1	cyclic-lactone-autoinducer	NZ_BCVY01000003.region001.gbk	131490	142392	10903	11	131489	142392	Bacillus_smithii_NBRC_15311_GCF_001591985.1__r3c1__ctg3_122	Bacillus_smithii_NBRC_15311_GCF_001591985.1__r3c1__ctg3_121			Y
Bacillus_solimangrovi_GH2-4_GCF_001742425.1	Firmicutes	Bacilli	Bacillales	Bacillaceae	Bacillus	r62c1	cyclic-lactone-autoinducer	NZ_MJEH01000062.region001.gbk	84344	104952	20609	21	84343	104952	Bacillus_solimangrovi_GH2-4_GCF_001742425.1__r62c1__ctg62_83			GCF_001742425.1/NZ_MJEH01000062.region001_12 # 10609 # 10734 # 1 # ID=28764_12;partial=00;start_type=ATG;rbs_motif=AGGAG;rbs_spacer=5-10bp;gc_cont=0.349	Y
Bacillus_sonorensis_7710_GCF_002271755.1	Firmicutes	Bacilli	Bacillales	Bacillaceae	Bacillus	r36c1	cyclic-lactone-autoinducer	NZ_NPCS01000039.region001.gbk	27684	44301	16618	21	27683	44301	Bacillus_sonorensis_7710_GCF_002271755.1__r36c1__ctg36_58			GCF_002271755.1/NZ_NPCS01000039.region001_15 # 10631 # 10762 # 1 # ID=29069_15;partial=00;start_type=ATG;rbs_motif=GGA/GAG/AGG;rbs_spacer=5-10bp;gc_cont=0.348	Y
Bacillus_sonorensis_AM12-57B_GCF_003473165.1	Firmicutes	Bacilli	Bacillales	Bacillaceae	Bacillus	r6c1	cyclic-lactone-autoinducer	NZ_QRLM01000014.region001.gbk	1	16623	16623	22	0	16623	Bacillus_sonorensis_AM12-57B_GCF_003473165.1__r6c1__ctg6_9	Bacillus_sonorensis_AM12-57B_GCF_003473165.1__r6c1__ctg6_8		GCF_003473165.1/NZ_QRLM01000014.region001_8 # 5862 # 5993 # -1 # ID=29528_8;partial=00;start_type=ATG;rbs_motif=GGA/GAG/AGG;rbs_spacer=5-10bp;gc_cont=0.348	Y
Bacillus_sonorensis_G25-136_GCF_015845975.1	Firmicutes	Bacilli	Bacillales	Bacillaceae	Bacillus	r9c1	cyclic-lactone-autoinducer,lanthipeptide-class-ii	NZ_LDIP01000010.region001.gbk	56132	81523	25392	28	64741	81523	Bacillus_sonorensis_G25-136_GCF_015845975.1__r9c1__ctg9_83	Bacillus_sonorensis_G25-136_GCF_015845975.1__r9c1__ctg9_84		GCF_015845975.1/NZ_LDIP01000010.region001_17 # 19241 # 19372 # 1 # ID=30092_17;partial=00;start_type=ATG;rbs_motif=GGA/GAG/AGG;rbs_spacer=5-10bp;gc_cont=0.348	Y
Bacillus_sonorensis_J41TS2_GCF_018332995.1	Firmicutes	Bacilli	Bacillales	Bacillaceae	Bacillus	r10c1	cyclic-lactone-autoinducer,lanthipeptide-class-ii	NZ_BORD01000010.region001.gbk	53105	78442	25338	27	61714	78442	Bacillus_sonorensis_J41TS2_GCF_018332995.1__r10c1__ctg10_83	Bacillus_sonorensis_J41TS2_GCF_018332995.1__r10c1__ctg10_84		GCF_018332995.1/NZ_BORD01000010.region001_17 # 19241 # 19372 # 1 # ID=30627_17;partial=00;start_type=ATG;rbs_motif=GGA/GAG/AGG;rbs_spacer=5-10bp;gc_cont=0.348	Y
Bacillus_sonorensis_L12_GCF_000342105.1	Firmicutes	Bacilli	Bacillales	Bacillaceae	Bacillus	r14c1	cyclic-lactone-autoinducer	NZ_AOFM01000016.region001.gbk	51382	67972	16591	20	51381	67972	Bacillus_sonorensis_L12_GCF_000342105.1__r14c1__ctg14_77	Bacillus_sonorensis_L12_GCF_000342105.1__r14c1__ctg14_78		GCF_000342105.1/NZ_AOFM01000016.region001_16 # 10631 # 10762 # 1 # ID=31093_16;partial=00;start_type=ATG;rbs_motif=GGA/GAG/AGG;rbs_spacer=5-10bp;gc_cont=0.348	Y
Bacillus_sonorensis_MGYG-HGUT-00227_GCF_902364585.1	Firmicutes	Bacilli	Bacillales	Bacillaceae	Bacillus	r14c1	cyclic-lactone-autoinducer	c00014_NZ_CABJ...region001.gbk	1	16623	16623	22	0	16623	Bacillus_sonorensis_MGYG-HGUT-00227_GCF_902364585.1__r14c1__ctg14_9	Bacillus_sonorensis_MGYG-HGUT-00227_GCF_902364585.1__r14c1__ctg14_8		GCF_902364585.1/c00014_NZ_CABJ...region001_8 # 5862 # 5993 # -1 # ID=31539_8;partial=00;start_type=ATG;rbs_motif=GGA/GAG/AGG;rbs_spacer=5-10bp;gc_cont=0.348	Y
Bacillus_sonorensis_NBRC_101234_=_KCTC_13918_GCF_000507125.1	Firmicutes	Bacilli	Bacillales	Bacillaceae	Bacillus	r2c1	cyclic-lactone-autoinducer	NZ_AYTN01000003.region001.gbk	1	16621	16621	22	0	16621	Bacillus_sonorensis_NBRC_101234_=_KCTC_13918_GCF_000507125.1__r2c1__ctg2_9	Bacillus_sonorensis_NBRC_101234_=_KCTC_13918_GCF_000507125.1__r2c1__ctg2_8		GCF_000507125.1/NZ_AYTN01000003.region001_8 # 5851 # 5991 # -1 # ID=32063_8;partial=00;start_type=ATG;rbs_motif=GGA/GAG/AGG;rbs_spacer=5-10bp;gc_cont=0.348	Y
Bacillus_sonorensis_NBRC_101234_=_KCTC_13918_NBRC_101234_GCF_001592005.1	Firmicutes	Bacilli	Bacillales	Bacillaceae	Bacillus	r20c1	cyclic-lactone-autoinducer	NZ_BCVZ01000020.region001.gbk	1	16504	16504	22	0	16504	Bacillus_sonorensis_NBRC_101234_=_KCTC_13918_NBRC_101234_GCF_001592005.1__r20c1__ctg20_9	Bacillus_sonorensis_NBRC_101234_=_KCTC_13918_NBRC_101234_GCF_001592005.1__r20c1__ctg20_8		GCF_001592005.1/NZ_BCVZ01000020.region001_8 # 5734 # 5874 # -1 # ID=32463_8;partial=00;start_type=ATG;rbs_motif=GGA/GAG/AGG;rbs_spacer=5-10bp;gc_cont=0.348	Y
Bacillus_sonorensis_SRCM101395_GCF_002202015.1	Firmicutes	Bacilli	Bacillales	Bacillaceae	Bacillus	r1c1	cyclic-lactone-autoinducer	NZ_CP021920.1.region001.gbk	157142	177903	20762	23	157141	177903	Bacillus_sonorensis_SRCM101395_GCF_002202015.1__r1c1__ctg1_171	Bacillus_sonorensis_SRCM101395_GCF_002202015.1__r1c1__ctg1_172		GCF_002202015.1/NZ_CP021920.1.region001_16 # 10631 # 10762 # 1 # ID=32849_16;partial=00;start_type=ATG;rbs_motif=GGA/GAG/AGG;rbs_spacer=5-10bp;gc_cont=0.348	Y
Bacillus_sp._03113_GCF_006546985.1	Firmicutes	Bacilli	Bacillales	Bacillaceae	Bacillus	r8c1	cyclic-lactone-autoinducer	NZ_VATK01000009.region001.gbk	153515	174105	20591	19	153514	174105	Bacillus_sp._03113_GCF_006546985.1__r8c1__ctg8_156				N
Bacillus_sp._275_GCF_001999205.1	Firmicutes	Bacilli	Bacillales	Bacillaceae	Bacillus	r1c6	cyclic-lactone-autoinducer,lanthipeptide-class-ii	NZ_CP019626.1.region006.gbk	1362115	1391530	29416	30	1370767	1391530	Bacillus_sp._275_GCF_001999205.1__r1c6__ctg1_1259	Bacillus_sp._275_GCF_001999205.1__r1c6__ctg1_1260		GCF_001999205.1/NZ_CP019626.1.region006_19 # 19285 # 19416 # 1 # ID=33554_19;partial=00;start_type=ATG;rbs_motif=AGGAG;rbs_spacer=5-10bp;gc_cont=0.348	Y
Bacillus_sp._34-1_GCF_010628745.1	Firmicutes	Bacilli	Bacillales	Bacillaceae	Bacillus	r51c1	cyclic-lactone-autoinducer	NZ_NJQX01000055.region001.gbk	1	14250	14250	17	0	14250	Bacillus_sp._34-1_GCF_010628745.1__r51c1__ctg51_5	Bacillus_sp._34-1_GCF_010628745.1__r51c1__ctg51_6		GCF_010628745.1/NZ_NJQX01000055.region001_6 # 4113 # 4250 # 1 # ID=33858_6;partial=00;start_type=ATG;rbs_motif=GGA/GAG/AGG;rbs_spacer=5-10bp;gc_cont=0.348	Y
Bacillus_sp._AFS051223_GCF_002581245.1	Firmicutes	Bacilli	Bacillales	Bacillaceae	Bacillus	r14c1	LAP,cyclic-lactone-autoinducer,thiopeptide	NZ_NUQD01000022.region001.gbk	1	18308	18308	16	2830	18308	Bacillus_sp._AFS051223_GCF_002581245.1__r14c1__ctg14_12	Bacillus_sp._AFS051223_GCF_002581245.1__r14c1__ctg14_13		GCF_002581245.1/NZ_NUQD01000022.region001_14 # 13462 # 13611 # 1 # ID=10_14;partial=00;start_type=ATG;rbs_motif=AGxAG;rbs_spacer=5-10bp;gc_cont=0.360	Y
Bacillus_sp._B1-b2_GCF_009183415.1	Firmicutes	Bacilli	Bacillales	Bacillaceae	Bacillus	r56c2	cyclic-lactone-autoinducer	NZ_WEHU01000006.region002.gbk	150276	171023	20748	17	150275	171023	Bacillus_sp._B1-b2_GCF_009183415.1__r56c2__ctg56_149	Bacillus_sp._B1-b2_GCF_009183415.1__r56c2__ctg56_150			Y
Bacillus_sp._BHET2_GCF_005938125.1	Firmicutes	Bacilli	Bacillales	Bacillaceae	Bacillus	r19c1	cyclic-lactone-autoinducer	NZ_VCQN01000008.region001.gbk	28883	49636	20754	21	28882	49636	Bacillus_sp._BHET2_GCF_005938125.1__r19c1__ctg19_43	Bacillus_sp._BHET2_GCF_005938125.1__r19c1__ctg19_44		GCF_005938125.1/NZ_VCQN01000008.region001_12 # 10632 # 10754 # 1 # ID=32_12;partial=00;start_type=ATG;rbs_motif=AGGAGG;rbs_spacer=5-10bp;gc_cont=0.333	Y
Bacillus_sp._CBEL-1_GCF_004348885.1	Firmicutes	Bacilli	Bacillales	Bacillaceae	Bacillus	r10c1	RiPP-like,cyclic-lactone-autoinducer	NZ_SBIM01000006.region001.gbk	48019	68766	20748	27	48018	68766	Bacillus_sp._CBEL-1_GCF_004348885.1__r10c1__ctg10_64	Bacillus_sp._CBEL-1_GCF_004348885.1__r10c1__ctg10_63		GCF_004348885.1/NZ_SBIM01000006.region001_12 # 10001 # 10132 # -1 # ID=33_12;partial=00;start_type=ATG;rbs_motif=AGGAG;rbs_spacer=5-10bp;gc_cont=0.318	Y
Bacillus_sp._Cs-700_GCF_011082085.1	Firmicutes	Bacilli	Bacillales	Bacillaceae	Bacillus	r1c6	RiPP-like,cyclic-lactone-autoinducer	NZ_CP041063.1.region006.gbk	2246718	2269509	22792	27	2248764	2269509	Bacillus_sp._Cs-700_GCF_011082085.1__r1c6__ctg1_2266	Bacillus_sp._Cs-700_GCF_011082085.1__r1c6__ctg1_2267		GCF_011082085.1/NZ_CP041063.1.region006_17 # 12667 # 12792 # 1 # ID=44_17;partial=00;start_type=ATG;rbs_motif=AGGAG;rbs_spacer=5-10bp;gc_cont=0.365	Y
Bacillus_sp._DB-2_GCF_003315125.1	Firmicutes	Bacilli	Bacillales	Bacillaceae	Bacillus	r31c1	cyclic-lactone-autoinducer	NZ_QNRN01000031.region001.gbk	1	14383	14383	13	0	14383	Bacillus_sp._DB-2_GCF_003315125.1__r31c1__ctg31_4	Bacillus_sp._DB-2_GCF_003315125.1__r31c1__ctg31_5			Y
Bacillus_sp._EAR8_GCF_904424705.1	Firmicutes	Bacilli	Bacillales	Bacillaceae	Bacillus	r20c1	cyclic-lactone-autoinducer	c00020_NZ_CAJG...region001.gbk	24638	45390	20753	19	24637	45390	Bacillus_sp._EAR8_GCF_904424705.1__r20c1__ctg20_28	Bacillus_sp._EAR8_GCF_904424705.1__r20c1__ctg20_27		GCF_904424705.1/c00020_NZ_CAJG...region001_7 # 10001 # 10123 # -1 # ID=114_7;partial=00;start_type=ATG;rbs_motif=AGGAGG;rbs_spacer=5-10bp;gc_cont=0.366	Y
Bacillus_sp._FJAT-26390_GCF_001682865.1	Firmicutes	Bacilli	Bacillales	Bacillaceae	Bacillus	r28c1	cyclic-lactone-autoinducer	NZ_MAQX01000036.region001.gbk	3126	23768	20643	29	3125	23768	Bacillus_sp._FJAT-26390_GCF_001682865.1__r28c1__ctg28_23	Bacillus_sp._FJAT-26390_GCF_001682865.1__r28c1__ctg28_22		GCF_001682865.1/NZ_MAQX01000036.region001_18 # 10001 # 10120 # -1 # ID=115_18;partial=00;start_type=ATG;rbs_motif=AGGAGG;rbs_spacer=5-10bp;gc_cont=0.442	Y
Bacillus_sp._FJAT-27238_GCF_001184755.1	Firmicutes	Bacilli	Bacillales	Bacillaceae	Bacillus	r1c3	NRPS,cyclic-lactone-autoinducer,transAT-PKS	NZ_LGJF01000001.region003.gbk	603971	713289	109319	56	607829	628490	Bacillus_sp._FJAT-27238_GCF_001184755.1__r1c3__ctg1_509	Bacillus_sp._FJAT-27238_GCF_001184755.1__r1c3__ctg1_510		GCF_001184755.1/NZ_LGJF01000001.region003_22 # 14386 # 14520 # 1 # ID=119_22;partial=00;start_type=ATG;rbs_motif=AGGAG;rbs_spacer=5-10bp;gc_cont=0.393	Y
Bacillus_sp._FJAT-27264_GCF_001682855.1	Firmicutes	Bacilli	Bacillales	Bacillaceae	Bacillus	r1c1	cyclic-lactone-autoinducer	NZ_MAQW01000001.region001.gbk	1052484	1073008	20525	22	1052483	1073008	Bacillus_sp._FJAT-27264_GCF_001682855.1__r1c1__ctg1_1016				N
Bacillus_sp._FJAT-45086_GCF_002797395.1	Firmicutes	Bacilli	Bacillales	Bacillaceae	Bacillus	r1c2	cyclic-lactone-autoinducer	NZ_KZ454943.1.region002.gbk	1932197	1952893	20697	21	1932196	1952893	Bacillus_sp._FJAT-45086_GCF_002797395.1__r1c2__ctg1_1834	Bacillus_sp._FJAT-45086_GCF_002797395.1__r1c2__ctg1_1835			Y
Bacillus_sp._FJAT-45348_GCF_002813025.1	Firmicutes	Bacilli	Bacillales	Bacillaceae	Bacillus	r1c5	LAP,cyclic-lactone-autoinducer,thiopeptide	NZ_CP025024.1.region005.gbk	3113674	3139973	26300	25	3119215	3139973	Bacillus_sp._FJAT-45348_GCF_002813025.1__r1c5__ctg1_2956	Bacillus_sp._FJAT-45348_GCF_002813025.1__r1c5__ctg1_2957		GCF_002813025.1/NZ_CP025024.1.region005_16 # 16142 # 16300 # 1 # ID=4692_16;partial=00;start_type=ATG;rbs_motif=AGGAGG;rbs_spacer=5-10bp;gc_cont=0.346	Y
Bacillus_sp._GbtcB13_GCF_019091225.1	Firmicutes	Bacilli	Bacillales	Bacillaceae	Bacillus	r6c1	cyclic-lactone-autoinducer,lanthipeptide-class-ii	c00006_NZ_JAGX...region001.gbk	55764	81004	25241	26	64398	81004	Bacillus_sp._GbtcB13_GCF_019091225.1__r6c1__ctg6_89	Bacillus_sp._GbtcB13_GCF_019091225.1__r6c1__ctg6_90		GCF_019091225.1/c00006_NZ_JAGX...region001_17 # 19266 # 19397 # 1 # ID=4693_17;partial=00;start_type=ATG;rbs_motif=GGA/GAG/AGG;rbs_spacer=5-10bp;gc_cont=0.348	Y
Bacillus_sp._HMSC76G11_GCF_001838545.1	Firmicutes	Bacilli	Bacillales	Bacillaceae	Bacillus	r11c1	RiPP-like,cyclic-lactone-autoinducer	NZ_KV837525.1.region001.gbk	10443	33211	22769	26	12471	33211	Bacillus_sp._HMSC76G11_GCF_001838545.1__r11c1__ctg11_29	Bacillus_sp._HMSC76G11_GCF_001838545.1__r11c1__ctg11_30		GCF_001838545.1/NZ_KV837525.1.region001_17 # 12653 # 12769 # 1 # ID=4712_17;partial=00;start_type=ATG;rbs_motif=AGGAGG;rbs_spacer=5-10bp;gc_cont=0.325	Y
Bacillus_sp._ISL-34_GCF_018613325.1	Firmicutes	Bacilli	Bacillales	Bacillaceae	Bacillus	r51c1	cyclic-lactone-autoinducer	c00051_NZ_JAGG...region001.gbk	147134	167766	20633	18	147133	167766	Bacillus_sp._ISL-34_GCF_018613325.1__r51c1__ctg51_153				N
Bacillus_sp._J13_GCF_000518945.1	Firmicutes	Bacilli	Bacillales	Bacillaceae	Bacillus	r62c1	cyclic-lactone-autoinducer	NZ_JAEO01000045.region001.gbk	1	14166	14166	17	0	14166	Bacillus_sp._J13_GCF_000518945.1__r62c1__ctg62_7	Bacillus_sp._J13_GCF_000518945.1__r62c1__ctg62_6		GCF_000518945.1/NZ_JAEO01000045.region001_4 # 3503 # 3643 # -1 # ID=4725_4;partial=00;start_type=ATG;rbs_motif=AGGAGG;rbs_spacer=5-10bp;gc_cont=0.539	Y
Bacillus_sp._J14TS2_GCF_018333015.1	Firmicutes	Bacilli	Bacillales	Bacillaceae	Bacillus	r3c1	cyclic-lactone-autoinducer	NZ_BORE01000003.region001.gbk	61852	82451	20600	19	61851	82451	Bacillus_sp._J14TS2_GCF_018333015.1__r3c1__ctg3_64				N
Bacillus_sp._J41TS8_GCF_018333035.1	Firmicutes	Bacilli	Bacillales	Bacillaceae	Bacillus	r18c1	cyclic-lactone-autoinducer,lanthipeptide-class-ii	NZ_BORF01000018.region001.gbk	1	25353	25353	26	0	16718	Bacillus_sp._J41TS8_GCF_018333035.1__r18c1__ctg18_9	Bacillus_sp._J41TS8_GCF_018333035.1__r18c1__ctg18_8		GCF_018333035.1/NZ_BORF01000018.region001_8 # 5957 # 6088 # -1 # ID=4726_8;partial=00;start_type=ATG;rbs_motif=GGA/GAG/AGG;rbs_spacer=5-10bp;gc_cont=0.348	Y
Bacillus_sp._JCM_19034_GCF_001310635.1	Firmicutes	Bacilli	Bacillales	Bacillaceae	Bacillus	r21c1	cyclic-lactone-autoinducer	NZ_BAXR01000021.region001.gbk	8110	28851	20742	26	8109	28851	Bacillus_sp._JCM_19034_GCF_001310635.1__r21c1__ctg21_25	Bacillus_sp._JCM_19034_GCF_001310635.1__r21c1__ctg21_24			Y
Bacillus_sp._LYLB4_GCF_002237975.1	Firmicutes	Bacilli	Bacillales	Bacillaceae	Bacillus	r25c1	cyclic-lactone-autoinducer,lanthipeptide-class-ii	NZ_NBBC01000030.region001.gbk	2693	32108	29416	30	2692	23455	Bacillus_sp._LYLB4_GCF_002237975.1__r25c1__ctg25_17	Bacillus_sp._LYLB4_GCF_002237975.1__r25c1__ctg25_16		GCF_002237975.1/NZ_NBBC01000030.region001_13 # 10001 # 10132 # -1 # ID=4788_13;partial=00;start_type=ATG;rbs_motif=AGGAG;rbs_spacer=5-10bp;gc_cont=0.356	Y
Bacillus_sp._M4U3P1_GCF_006965545.2	Firmicutes	Bacilli	Bacillales	Bacillaceae	Bacillus	r1c3	cyclic-lactone-autoinducer	NZ_CP041372.2.region003.gbk	1115892	1136580	20689	21	1115891	1136580	Bacillus_sp._M4U3P1_GCF_006965545.2__r1c3__ctg1_1117	Bacillus_sp._M4U3P1_GCF_006965545.2__r1c3__ctg1_1116			Y
Bacillus_sp._Marseille-P3800_GCF_900197585.1	Firmicutes	Bacilli	Bacillales	Bacillaceae	Bacillus	r13c1	cyclic-lactone-autoinducer	NZ_FZLP01000002.region001.gbk	383893	404638	20746	22	383892	404638	Bacillus_sp._Marseille-P3800_GCF_900197585.1__r13c1__ctg13_416	Bacillus_sp._Marseille-P3800_GCF_900197585.1__r13c1__ctg13_415		GCF_900197585.1/NZ_FZLP01000002.region001_9 # 10001 # 10123 # -1 # ID=5350_9;partial=00;start_type=ATG;rbs_motif=AGGAG;rbs_spacer=5-10bp;gc_cont=0.374	Y
Bacillus_sp._N1-1_GCF_009818105.1	Firmicutes	Bacilli	Bacillales	Bacillaceae	Bacillus	r1c6	RiPP-like,cyclic-lactone-autoinducer	NZ_CP046564.1.region006.gbk	3989686	4012605	22920	25	3991860	4012605	Bacillus_sp._N1-1_GCF_009818105.1__r1c6__ctg1_4012	Bacillus_sp._N1-1_GCF_009818105.1__r1c6__ctg1_4013		GCF_009818105.1/NZ_CP046564.1.region006_17 # 12795 # 12920 # 1 # ID=9554_17;partial=00;start_type=ATG;rbs_motif=AGGAG;rbs_spacer=5-10bp;gc_cont=0.373	Y
Bacillus_sp._N35-10-4_GCF_001884225.1	Firmicutes	Bacilli	Bacillales	Bacillaceae	Bacillus	r58c1	LAP,cyclic-lactone-autoinducer,thiopeptide	NZ_MAOF01000072.region001.gbk	178340	201658	23319	16	178339	198978	Bacillus_sp._N35-10-4_GCF_001884225.1__r58c1__ctg58_162			GCF_001884225.1/NZ_MAOF01000072.region001_6 # 9859 # 10008 # -1 # ID=9555_6;partial=00;start_type=ATG;rbs_motif=AGxAG;rbs_spacer=5-10bp;gc_cont=0.367	Y
Bacillus_sp._OK838_GCF_900188495.1	Firmicutes	Bacilli	Bacillales	Bacillaceae	Bacillus	r78c1	cyclic-lactone-autoinducer	NZ_FZPG01000036.region001.gbk	1	14103	14103	11	0	14103	Bacillus_sp._OK838_GCF_900188495.1__r78c1__ctg78_4				N
Bacillus_sp._REN51N_GCF_000815345.1	Firmicutes	Bacilli	Bacillales	Bacillaceae	Bacillus	r16c1	cyclic-lactone-autoinducer,lanthipeptide-class-ii	NZ_JXAB01000022.region001.gbk	154642	183801	29160	25	154641	175357	Bacillus_sp._REN51N_GCF_000815345.1__r16c1__ctg16_160	Bacillus_sp._REN51N_GCF_000815345.1__r16c1__ctg16_159		GCF_000815345.1/NZ_JXAB01000022.region001_11 # 10001 # 10147 # -1 # ID=9556_11;partial=00;start_type=ATG;rbs_motif=AGGAG;rbs_spacer=5-10bp;gc_cont=0.293	Y
Bacillus_sp._SD088_GCF_017355205.1	Firmicutes	Bacilli	Bacillales	Bacillaceae	Bacillus	r43c1	cyclic-lactone-autoinducer	c00043_NZ_JADI...region001.gbk	6950	22816	15867	24	6949	22816	Bacillus_sp._SD088_GCF_017355205.1__r43c1__ctg43_23				N
Bacillus_sp._SGD-V-76_GCF_001457055.1	Firmicutes	Bacilli	Bacillales	Bacillaceae	Bacillus	r15c1	cyclic-lactone-autoinducer	NZ_KQ758641.1.region001.gbk	39489	59617	20129	29	39488	59617		Bacillus_sp._SGD-V-76_GCF_001457055.1__r15c1__ctg15_61			Y
Bacillus_sp._SRB_8_GCF_003264205.1	Firmicutes	Bacilli	Bacillales	Bacillaceae	Bacillus	r21c1	cyclic-lactone-autoinducer,lanthipeptide-class-ii	NZ_NADT01000017.region001.gbk	152514	171221	18708	20	152513	171221	Bacillus_sp._SRB_8_GCF_003264205.1__r21c1__ctg21_177	Bacillus_sp._SRB_8_GCF_003264205.1__r21c1__ctg21_176		GCF_003264205.1/NZ_NADT01000017.region001_12 # 10001 # 10141 # -1 # ID=10364_12;partial=00;start_type=ATG;rbs_motif=AGGAG;rbs_spacer=5-10bp;gc_cont=0.305	Y
Bacillus_sp._SRB1LM_GCF_015712725.1	Firmicutes	Bacilli	Bacillales	Bacillaceae	Bacillus	r30c1	LAP,cyclic-lactone-autoinducer,thiopeptide	NZ_VWVP01000007.region001.gbk	8590	40915	32326	26	8589	29370	Bacillus_sp._SRB1LM_GCF_015712725.1__r30c1__ctg30_13	Bacillus_sp._SRB1LM_GCF_015712725.1__r30c1__ctg30_12		GCF_015712725.1/NZ_VWVP01000007.region001_6 # 10001 # 10150 # -1 # ID=10365_6;partial=00;start_type=ATG;rbs_motif=AGxAG;rbs_spacer=5-10bp;gc_cont=0.360	Y
Bacillus_sp._TYF-LIM-B05_GCF_003717485.1	Firmicutes	Bacilli	Bacillales	Bacillaceae	Bacillus	r8c1	cyclic-lactone-autoinducer,lanthipeptide-class-ii	NZ_QXII01000007.region001.gbk	1	25446	25446	26	0	16811	Bacillus_sp._TYF-LIM-B05_GCF_003717485.1__r8c1__ctg8_9	Bacillus_sp._TYF-LIM-B05_GCF_003717485.1__r8c1__ctg8_8		GCF_003717485.1/NZ_QXII01000007.region001_8 # 6050 # 6181 # -1 # ID=10366_8;partial=00;start_type=ATG;rbs_motif=GGA/GAG/AGG;rbs_spacer=5-10bp;gc_cont=0.348	Y
Bacillus_sp._VT_712_GCF_001614195.1	Firmicutes	Bacilli	Bacillales	Bacillaceae	Bacillus	r40c1	cyclic-lactone-autoinducer	NZ_LWBK01000040.region001.gbk	1	14501	14501	20	0	14501		Bacillus_sp._VT_712_GCF_001614195.1__r40c1__ctg40_7			Y
Bacillus_sp._X1(2014)_DE0237_GCF_007677495.1	Firmicutes	Bacilli	Bacillales	Bacillaceae	Bacillus	r4c1	cyclic-lactone-autoinducer,lanthipeptide-class-iii	NZ_VECT01000013.region001.gbk	58092	86015	27924	32	65263	86015	Bacillus_sp._X1(2014)_DE0237_GCF_007677495.1__r4c1__ctg4_82	Bacillus_sp._X1(2014)_DE0237_GCF_007677495.1__r4c1__ctg4_83		GCF_007677495.1/NZ_VECT01000013.region001_23 # 17787 # 17924 # 1 # ID=19433_23;partial=00;start_type=ATG;rbs_motif=GGA/GAG/AGG;rbs_spacer=5-10bp;gc_cont=0.333	Y
Bacillus_sp._YR288_GCF_002797955.1	Firmicutes	Bacilli	Bacillales	Bacillaceae	Bacillus	r1c1	cyclic-lactone-autoinducer	NZ_PGEU01000001.region001.gbk	25043	45240	20198	22	25042	45240		Bacillus_sp._YR288_GCF_002797955.1__r1c1__ctg1_41			Y
Bacillus_subtilis_DE0224_GCF_008764245.1	Firmicutes	Bacilli	Bacillales	Bacillaceae	Bacillus	r73c1	cyclic-lactone-autoinducer	NZ_VTQV01000041.region001.gbk	25202	38444	13243	11	25201	38444	Bacillus_subtilis_DE0224_GCF_008764245.1__r73c1__ctg73_34	Bacillus_subtilis_DE0224_GCF_008764245.1__r73c1__ctg73_33			Y
Bacillus_subtilis_subsp._subtilis_PJ-7_GCF_003665215.1	Firmicutes	Bacilli	Bacillales	Bacillaceae	Bacillus	r1c9	cyclic-lactone-autoinducer,lanthipeptide-class-ii	NZ_CP032855.1.region009.gbk	2717350	2746608	29259	28	2717349	2737955	Bacillus_subtilis_subsp._subtilis_PJ-7_GCF_003665215.1__r1c9__ctg1_2879			GCF_003665215.1/NZ_CP032855.1.region009_12 # 9844 # 9975 # -1 # ID=20370_12;partial=00;start_type=ATG;rbs_motif=AGGAG;rbs_spacer=5-10bp;gc_cont=0.356	Y
Bacillus_subtilis_subsp._subtilis_SRCM100333_GCF_002201995.1	Firmicutes	Bacilli	Bacillales	Bacillaceae	Bacillus	r1c2	cyclic-lactone-autoinducer,lanthipeptide-class-ii	NZ_CP021892.1.region002.gbk	615613	644871	29259	27	615612	636218	Bacillus_subtilis_subsp._subtilis_SRCM100333_GCF_002201995.1__r1c2__ctg1_621			GCF_002201995.1/NZ_CP021892.1.region002_12 # 9844 # 9975 # -1 # ID=20871_12;partial=00;start_type=ATG;rbs_motif=AGGAG;rbs_spacer=5-10bp;gc_cont=0.356	Y
Bacillus_thuringiensis_4W2_GCF_009646465.1	Firmicutes	Bacilli	Bacillales	Bacillaceae	Bacillus	r4c1	LAP,cyclic-lactone-autoinducer,thiopeptide	NZ_WJCD01000013.region001.gbk	104959	128626	23668	17	104958	125739	Bacillus_thuringiensis_4W2_GCF_009646465.1__r4c1__ctg4_96	Bacillus_thuringiensis_4W2_GCF_009646465.1__r4c1__ctg4_95		GCF_009646465.1/NZ_WJCD01000013.region001_6 # 10001 # 10150 # -1 # ID=20872_6;partial=00;start_type=ATG;rbs_motif=AGxAG;rbs_spacer=5-10bp;gc_cont=0.373	Y
Bacillus_thuringiensis_AFS005140_GCF_002558525.1	Firmicutes	Bacilli	Bacillales	Bacillaceae	Bacillus	r86c1	LAP,cyclic-lactone-autoinducer,thiopeptide	NZ_NTYF01000190.region001.gbk	1	23411	23411	24	2657	23411	Bacillus_thuringiensis_AFS005140_GCF_002558525.1__r86c1__ctg86_12	Bacillus_thuringiensis_AFS005140_GCF_002558525.1__r86c1__ctg86_13		GCF_002558525.1/NZ_NTYF01000190.region001_13 # 13244 # 13411 # 1 # ID=22014_13;partial=00;start_type=ATG;rbs_motif=AGGAG;rbs_spacer=5-10bp;gc_cont=0.286	Y
Bacillus_thuringiensis_AFS013213_GCF_002558015.1	Firmicutes	Bacilli	Bacillales	Bacillaceae	Bacillus	r9c1	cyclic-lactone-autoinducer	NZ_NTVJ01000010.region001.gbk	1	10869	10869	13	0	10869	Bacillus_thuringiensis_AFS013213_GCF_002558015.1__r9c1__ctg9_1	Bacillus_thuringiensis_AFS013213_GCF_002558015.1__r9c1__ctg9_2		GCF_002558015.1/NZ_NTVJ01000010.region001_2 # 702 # 869 # 1 # ID=22032_2;partial=00;start_type=ATG;rbs_motif=AGGAG;rbs_spacer=5-10bp;gc_cont=0.286	Y
Bacillus_thuringiensis_AFS030866_GCF_002586085.1	Firmicutes	Bacilli	Bacillales	Bacillaceae	Bacillus	r52c1	LAP,cyclic-lactone-autoinducer,thiopeptide	NZ_NUPG01000156.region001.gbk	12952	36399	23448	24	12951	33705	Bacillus_thuringiensis_AFS030866_GCF_002586085.1__r52c1__ctg52_27	Bacillus_thuringiensis_AFS030866_GCF_002586085.1__r52c1__ctg52_26		GCF_002586085.1/NZ_NUPG01000156.region001_13 # 10001 # 10168 # -1 # ID=22525_13;partial=00;start_type=ATG;rbs_motif=AGGAG;rbs_spacer=5-10bp;gc_cont=0.280	Y
Bacillus_thuringiensis_AFS059039_GCF_002571305.1	Firmicutes	Bacilli	Bacillales	Bacillaceae	Bacillus	r288c1	LAP,cyclic-lactone-autoinducer,thiopeptide	NZ_NVEK01000098.region001.gbk	12429	35839	23411	24	12428	33182	Bacillus_thuringiensis_AFS059039_GCF_002571305.1__r288c1__ctg288_26	Bacillus_thuringiensis_AFS059039_GCF_002571305.1__r288c1__ctg288_25		GCF_002571305.1/NZ_NVEK01000098.region001_13 # 10001 # 10168 # -1 # ID=22941_13;partial=00;start_type=ATG;rbs_motif=AGGAG;rbs_spacer=5-10bp;gc_cont=0.280	Y
Bacillus_thuringiensis_AFS076861_GCF_002565085.1	Firmicutes	Bacilli	Bacillales	Bacillaceae	Bacillus	r28c1	LAP,cyclic-lactone-autoinducer,thiopeptide	NZ_NUYP01000035.region001.gbk	34766	70834	36069	38	50080	70834	Bacillus_thuringiensis_AFS076861_GCF_002565085.1__r28c1__ctg28_65	Bacillus_thuringiensis_AFS076861_GCF_002565085.1__r28c1__ctg28_66		GCF_002565085.1/NZ_NUYP01000035.region001_26 # 25902 # 26069 # 1 # ID=23404_26;partial=00;start_type=ATG;rbs_motif=AGGAG;rbs_spacer=5-10bp;gc_cont=0.286	Y
Bacillus_thuringiensis_AFS088016_GCF_002564505.1	Firmicutes	Bacilli	Bacillales	Bacillaceae	Bacillus	r121c1	LAP,cyclic-lactone-autoinducer,thiopeptide	NZ_NUUZ01000021.region001.gbk	1	23496	23496	24	2742	23496	Bacillus_thuringiensis_AFS088016_GCF_002564505.1__r121c1__ctg121_12	Bacillus_thuringiensis_AFS088016_GCF_002564505.1__r121c1__ctg121_13		GCF_002564505.1/NZ_NUUZ01000021.region001_13 # 13329 # 13496 # 1 # ID=24209_13;partial=00;start_type=ATG;rbs_motif=AGGAG;rbs_spacer=5-10bp;gc_cont=0.286	Y
Bacillus_thuringiensis_s1783_GCF_014932865.1	Firmicutes	Bacilli	Bacillales	Bacillaceae	Bacillus	r21c1	LAP,cyclic-lactone-autoinducer,thiopeptide	c00021_NZ_JACY...region001.gbk	8872	35090	26219	29	14352	35090	Bacillus_thuringiensis_s1783_GCF_014932865.1__r21c1__ctg21_30	Bacillus_thuringiensis_s1783_GCF_014932865.1__r21c1__ctg21_31		GCF_014932865.1/c00021_NZ_JACY...region001_16 # 16088 # 16219 # 1 # ID=24210_16;partial=00;start_type=ATG;rbs_motif=AATAA;rbs_spacer=15bp;gc_cont=0.333	Y
Bacillus_toyonensis_AFS044250_GCF_002581735.1	Firmicutes	Bacilli	Bacillales	Bacillaceae	Bacillus	r236c1	cyclic-lactone-autoinducer	NZ_NUSQ01000009.region001.gbk	1	6333	6333	10	0	6333	Bacillus_toyonensis_AFS044250_GCF_002581735.1__r236c1__ctg236_3			GCF_002581735.1/NZ_NUSQ01000009.region001_2 # 892 # 1014 # -1 # ID=24929_2;partial=00;start_type=ATG;rbs_motif=AGGAG;rbs_spacer=5-10bp;gc_cont=0.309	Y
Bacillus_toyonensis_AFS073955_GCF_002570025.1	Firmicutes	Bacilli	Bacillales	Bacillaceae	Bacillus	r53c1	cyclic-lactone-autoinducer	NZ_NVHI01000158.region001.gbk	1	6365	6365	11	0	6365	Bacillus_toyonensis_AFS073955_GCF_002570025.1__r53c1__ctg53_9			GCF_002570025.1/NZ_NVHI01000158.region001_9 # 5320 # 5442 # 1 # ID=25466_9;partial=00;start_type=ATG;rbs_motif=AGGAG;rbs_spacer=5-10bp;gc_cont=0.301	Y
Bacillus_tropicus_DE0099_GCF_007682035.1	Firmicutes	Bacilli	Bacillales	Bacillaceae	Bacillus	r37c1	LAP,cyclic-lactone-autoinducer,thiopeptide	NZ_VEMB01000007.region001.gbk	8151	40334	32184	25	19617	40334	Bacillus_tropicus_DE0099_GCF_007682035.1__r37c1__ctg37_29			GCF_007682035.1/NZ_VEMB01000007.region001_19 # 22153 # 22326 # 1 # ID=25965_19;partial=00;start_type=ATG;rbs_motif=TAAAAA;rbs_spacer=15bp;gc_cont=0.351	Y
Bacillus_tropicus_DE0383_GCF_007676425.1	Firmicutes	Bacilli	Bacillales	Bacillaceae	Bacillus	r20c1	LAP,cyclic-lactone-autoinducer,thiopeptide	NZ_VEJV01000007.region001.gbk	7385	39568	32184	23	18929	39568	Bacillus_tropicus_DE0383_GCF_007676425.1__r20c1__ctg20_26			GCF_007676425.1/NZ_VEJV01000007.region001_17 # 22153 # 22326 # 1 # ID=27092_17;partial=00;start_type=ATG;rbs_motif=TAAAAA;rbs_spacer=15bp;gc_cont=0.345	Y
Bacillus_tropicus_DE0443_GCF_007672275.1	Firmicutes	Bacilli	Bacillales	Bacillaceae	Bacillus	r19c1	LAP,cyclic-lactone-autoinducer,thiopeptide	NZ_VDUR01000007.region001.gbk	8365	40548	32184	28	19909	40548	Bacillus_tropicus_DE0443_GCF_007672275.1__r19c1__ctg19_31			GCF_007672275.1/NZ_VDUR01000007.region001_25 # 22177 # 22326 # 1 # ID=27093_25;partial=00;start_type=ATG;rbs_motif=AGxAG;rbs_spacer=5-10bp;gc_cont=0.367	Y
Bacillus_tropicus_FDAARGOS_897_GCF_016027575.1	Firmicutes	Bacilli	Bacillales	Bacillaceae	Bacillus	r1c1	LAP,cyclic-lactone-autoinducer,thiopeptide	NZ_CP065743.1.region001.gbk	1412321	1444646	32326	26	1423865	1444646	Bacillus_tropicus_FDAARGOS_897_GCF_016027575.1__r1c1__ctg1_1387	Bacillus_tropicus_FDAARGOS_897_GCF_016027575.1__r1c1__ctg1_1388		GCF_016027575.1/NZ_CP065743.1.region001_23 # 22177 # 22326 # 1 # ID=27557_23;partial=00;start_type=ATG;rbs_motif=AGxAG;rbs_spacer=5-10bp;gc_cont=0.373	Y
Bacillus_tropicus_FDAARGOS_920_GCF_016026855.1	Firmicutes	Bacilli	Bacillales	Bacillaceae	Bacillus	r1c9	LAP,cyclic-lactone-autoinducer,thiopeptide	NZ_CP065739.1.region009.gbk	4374480	4406805	32326	28	4386024	4406805	Bacillus_tropicus_FDAARGOS_920_GCF_016026855.1__r1c9__ctg1_4407	Bacillus_tropicus_FDAARGOS_920_GCF_016026855.1__r1c9__ctg1_4408		GCF_016026855.1/NZ_CP065739.1.region009_24 # 22177 # 22326 # 1 # ID=27836_24;partial=00;start_type=ATG;rbs_motif=AGxAG;rbs_spacer=5-10bp;gc_cont=0.373	Y
Bacillus_tropicus_G25-7_GCF_015846035.1	Firmicutes	Bacilli	Bacillales	Bacillaceae	Bacillus	r10c1	cyclic-lactone-autoinducer	NZ_LDKE01000012.region001.gbk	1	10376	10376	16	0	10376	Bacillus_tropicus_G25-7_GCF_015846035.1__r10c1__ctg10_10			GCF_015846035.1/NZ_LDKE01000012.region001_10 # 7339 # 7461 # 1 # ID=28341_10;partial=00;start_type=ATG;rbs_motif=AGGAG;rbs_spacer=5-10bp;gc_cont=0.301	Y
Bacillus_velezensis_AP194_GCF_001647965.1	Firmicutes	Bacilli	Bacillales	Bacillaceae	Bacillus	r6c1	cyclic-lactone-autoinducer,lanthipeptide-class-ii	NZ_LSZL01000006.region001.gbk	2559	31974	29416	30	2558	23321	Bacillus_velezensis_AP194_GCF_001647965.1__r6c1__ctg6_17	Bacillus_velezensis_AP194_GCF_001647965.1__r6c1__ctg6_16		GCF_001647965.1/NZ_LSZL01000006.region001_13 # 10001 # 10132 # -1 # ID=28767_13;partial=00;start_type=ATG;rbs_motif=AGGAG;rbs_spacer=5-10bp;gc_cont=0.356	Y
Bacillus_velezensis_CLA178_GCF_014495825.1	Firmicutes	Bacilli	Bacillales	Bacillaceae	Bacillus	r1c3	cyclic-lactone-autoinducer,lanthipeptide-class-ii	NZ_CP061087.1.region003.gbk	622960	652375	29416	30	622959	643722	Bacillus_velezensis_CLA178_GCF_014495825.1__r1c3__ctg1_576	Bacillus_velezensis_CLA178_GCF_014495825.1__r1c3__ctg1_575		GCF_014495825.1/NZ_CP061087.1.region003_13 # 10001 # 10132 # -1 # ID=29071_13;partial=00;start_type=ATG;rbs_motif=AGGAG;rbs_spacer=5-10bp;gc_cont=0.356	Y
Bacillus_velezensis_DKU_NT_04_GCF_002944585.1	Firmicutes	Bacilli	Bacillales	Bacillaceae	Bacillus	r1c6	cyclic-lactone-autoinducer,lanthipeptide-class-ii	NZ_CP026533.1.region006.gbk	2452422	2481837	29416	31	2452421	2473184	Bacillus_velezensis_DKU_NT_04_GCF_002944585.1__r1c6__ctg1_2509	Bacillus_velezensis_DKU_NT_04_GCF_002944585.1__r1c6__ctg1_2508		GCF_002944585.1/NZ_CP026533.1.region006_15 # 10001 # 10132 # -1 # ID=29531_15;partial=00;start_type=ATG;rbs_motif=AGGAG;rbs_spacer=5-10bp;gc_cont=0.356	Y
Bacillus_velezensis_GF610_GCF_002276265.1	Firmicutes	Bacilli	Bacillales	Bacillaceae	Bacillus	r10c1	cyclic-lactone-autoinducer,lanthipeptide-class-ii	NZ_NQXV01000018.region001.gbk	60907	90322	29416	31	69559	90322	Bacillus_velezensis_GF610_GCF_002276265.1__r10c1__ctg10_71	Bacillus_velezensis_GF610_GCF_002276265.1__r10c1__ctg10_72		GCF_002276265.1/NZ_NQXV01000018.region001_19 # 19285 # 19416 # 1 # ID=30094_19;partial=00;start_type=ATG;rbs_motif=AGGAG;rbs_spacer=5-10bp;gc_cont=0.348	Y
Bacillus_velezensis_HU-91_GCF_010671715.1	Firmicutes	Bacilli	Bacillales	Bacillaceae	Bacillus	r4c1	cyclic-lactone-autoinducer,lanthipeptide-class-ii	c00004_NZ_JAAH...region001.gbk	2590	32005	29416	30	2589	23352	Bacillus_velezensis_HU-91_GCF_010671715.1__r4c1__ctg4_17	Bacillus_velezensis_HU-91_GCF_010671715.1__r4c1__ctg4_16		GCF_010671715.1/c00004_NZ_JAAH...region001_13 # 10001 # 10132 # -1 # ID=30629_13;partial=00;start_type=ATG;rbs_motif=AGGAG;rbs_spacer=5-10bp;gc_cont=0.356	Y
Bacillus_velezensis_LBUM279_GCF_016415725.1	Firmicutes	Bacilli	Bacillales	Bacillaceae	Bacillus	r1c3	cyclic-lactone-autoinducer,lanthipeptide-class-ii	NZ_CP065791.1.region003.gbk	656253	685668	29416	30	656252	677015	Bacillus_velezensis_LBUM279_GCF_016415725.1__r1c3__ctg1_619	Bacillus_velezensis_LBUM279_GCF_016415725.1__r1c3__ctg1_618		GCF_016415725.1/NZ_CP065791.1.region003_13 # 10001 # 10132 # -1 # ID=31098_13;partial=00;start_type=ATG;rbs_motif=AGGAG;rbs_spacer=5-10bp;gc_cont=0.356	Y
Bacillus_velezensis_MG33_GCF_003265765.1	Firmicutes	Bacilli	Bacillales	Bacillaceae	Bacillus	r27c1	cyclic-lactone-autoinducer,lanthipeptide-class-ii	NZ_QJJB01000005.region001.gbk	2531	31946	29416	30	2530	23293	Bacillus_velezensis_MG33_GCF_003265765.1__r27c1__ctg27_17	Bacillus_velezensis_MG33_GCF_003265765.1__r27c1__ctg27_16		GCF_003265765.1/NZ_QJJB01000005.region001_13 # 10001 # 10132 # -1 # ID=31542_13;partial=00;start_type=ATG;rbs_motif=AGGAG;rbs_spacer=5-10bp;gc_cont=0.356	Y
Bacillus_velezensis_SRCM102752_GCF_009914135.1	Firmicutes	Bacilli	Bacillales	Bacillaceae	Bacillus	r1c12	cyclic-lactone-autoinducer,lanthipeptide-class-ii	NZ_CP028961.1.region012.gbk	3697270	3726685	29416	30	3697269	3718032	Bacillus_velezensis_SRCM102752_GCF_009914135.1__r1c12__ctg1_3593	Bacillus_velezensis_SRCM102752_GCF_009914135.1__r1c12__ctg1_3592		GCF_009914135.1/NZ_CP028961.1.region012_13 # 10001 # 10132 # -1 # ID=32065_13;partial=00;start_type=ATG;rbs_motif=AGGAG;rbs_spacer=5-10bp;gc_cont=0.356	Y
Bacillus_wiedmannii_AFS020694_GCF_002557595.1	Firmicutes	Bacilli	Bacillales	Bacillaceae	Bacillus	r31c1	cyclic-lactone-autoinducer	NZ_NUCA01000040.region001.gbk	1	14487	14487	13	0	14487	Bacillus_wiedmannii_AFS020694_GCF_002557595.1__r31c1__ctg31_4	Bacillus_wiedmannii_AFS020694_GCF_002557595.1__r31c1__ctg31_5			Y
Bacillus_wiedmannii_AFS023423_GCF_002557295.1	Firmicutes	Bacilli	Bacillales	Bacillaceae	Bacillus	r7c1	cyclic-lactone-autoinducer,thiopeptide	NZ_NUBM01000016.region001.gbk	3857	38432	34576	29	3856	24628	Bacillus_wiedmannii_AFS023423_GCF_002557295.1__r7c1__ctg7_14	Bacillus_wiedmannii_AFS023423_GCF_002557295.1__r7c1__ctg7_13			Y
Bacillus_wiedmannii_AFS033387_GCF_002588735.1	Firmicutes	Bacilli	Bacillales	Bacillaceae	Bacillus	r27c1	cyclic-lactone-autoinducer	NZ_NUUE01000036.region001.gbk	3858	18348	14491	13	3857	18348	Bacillus_wiedmannii_AFS033387_GCF_002588735.1__r27c1__ctg27_15	Bacillus_wiedmannii_AFS033387_GCF_002588735.1__r27c1__ctg27_14			Y
Bacillus_wiedmannii_AFS036521_GCF_002583915.1	Firmicutes	Bacilli	Bacillales	Bacillaceae	Bacillus	r23c1	cyclic-lactone-autoinducer	NZ_NUTP01000031.region001.gbk	3857	18343	14487	13	3856	18343	Bacillus_wiedmannii_AFS036521_GCF_002583915.1__r23c1__ctg23_15	Bacillus_wiedmannii_AFS036521_GCF_002583915.1__r23c1__ctg23_14			Y
Bacillus_wiedmannii_AFS081123_GCF_002568785.1	Firmicutes	Bacilli	Bacillales	Bacillaceae	Bacillus	r26c1	cyclic-lactone-autoinducer	NZ_NVFW01000035.region001.gbk	1	14162	14162	13	0	14162	Bacillus_wiedmannii_AFS081123_GCF_002568785.1__r26c1__ctg26_4	Bacillus_wiedmannii_AFS081123_GCF_002568785.1__r26c1__ctg26_5			Y
Bacillus_xiapuensis_FJAT-46582_GCF_002797355.1	Firmicutes	Bacilli	Bacillales	Bacillaceae	Bacillus	r2c1	cyclic-lactone-autoinducer	NZ_KZ454940.1.region001.gbk	10748	31487	20740	23	10747	31487	Bacillus_xiapuensis_FJAT-46582_GCF_002797355.1__r2c1__ctg2_23	Bacillus_xiapuensis_FJAT-46582_GCF_002797355.1__r2c1__ctg2_24		GCF_002797355.1/NZ_KZ454940.1.region001_12 # 10561 # 10740 # 1 # ID=36_12;partial=00;start_type=ATG;rbs_motif=AGGAG;rbs_spacer=5-10bp;gc_cont=0.317	Y
Bacteroides_fragilis_1001099B_141217_C6_GCF_015550765.1	Bacteroidetes	Bacteroidia	Bacteroidales	Bacteroidaceae	Bacteroides	r1c1	cyclic-lactone-autoinducer	c00001_NZ_JADN...region001.gbk	132444	152935	20492	15	132443	152935	Bacteroides_fragilis_1001099B_141217_C6_GCF_015550765.1__r1c1__ctg1_119				N
Bacteroides_fragilis_1001271B_151109_A3_GCF_015547555.1	Bacteroidetes	Bacteroidia	Bacteroidales	Bacteroidaceae	Bacteroides	r31c1	cyclic-lactone-autoinducer	c00031_NZ_JADM...region001.gbk	6597	27088	20492	14	6596	27088	Bacteroides_fragilis_1001271B_151109_A3_GCF_015547555.1__r31c1__ctg31_16				N
Bacteroides_fragilis_20200206_GCF_015070945.1	Bacteroidetes	Bacteroidia	Bacteroidales	Bacteroidaceae	Bacteroides	r12c1	cyclic-lactone-autoinducer	c00012_NZ_JADD...region001.gbk	67379	87870	20492	14	67378	87870	Bacteroides_fragilis_20200206_GCF_015070945.1__r12c1__ctg12_57				N
Bacteroides_fragilis_3_1_12_GCF_000157015.1	Bacteroidetes	Bacteroidia	Bacteroidales	Bacteroidaceae	Bacteroides	r21c2	cyclic-lactone-autoinducer	NZ_EQ973215.1.region002.gbk	172729	193220	20492	16	172728	193220	Bacteroides_fragilis_3_1_12_GCF_000157015.1__r21c2__ctg21_174				N
Bacteroides_fragilis_AF14-14AC_GCF_003465265.1	Bacteroidetes	Bacteroidia	Bacteroidales	Bacteroidaceae	Bacteroides	r12c1	cyclic-lactone-autoinducer	NZ_QRZO01000002.region001.gbk	240832	261323	20492	15	240831	261323	Bacteroides_fragilis_AF14-14AC_GCF_003465265.1__r12c1__ctg12_235				N
Bacteroides_fragilis_AF14-26_GCF_003464635.1	Bacteroidetes	Bacteroidia	Bacteroidales	Bacteroidaceae	Bacteroides	r12c1	cyclic-lactone-autoinducer	NZ_QRZH01000002.region001.gbk	243228	263719	20492	15	243227	263719	Bacteroides_fragilis_AF14-26_GCF_003464635.1__r12c1__ctg12_237				N
Bacteroides_fragilis_BF8_GCF_001695355.1	Bacteroidetes	Bacteroidia	Bacteroidales	Bacteroidaceae	Bacteroides	r2c2	cyclic-lactone-autoinducer	NZ_LGTH01000002.region002.gbk	573572	594063	20492	16	573571	594063	Bacteroides_fragilis_BF8_GCF_001695355.1__r2c2__ctg2_527				N
Bacteroides_fragilis_CNM20180471_GCF_014639005.1	Bacteroidetes	Bacteroidia	Bacteroidales	Bacteroidaceae	Bacteroides	r52c2	cyclic-lactone-autoinducer	c00052_NZ_JACL...region002.gbk	87581	108072	20492	15	87580	108072	Bacteroides_fragilis_CNM20180471_GCF_014639005.1__r52c2__ctg52_95				N
Bacteroides_fragilis_DCMOUH0017B_GCF_000710375.2	Bacteroidetes	Bacteroidia	Bacteroidales	Bacteroidaceae	Bacteroides	r1c4	cyclic-lactone-autoinducer	NZ_CP036539.1.region004.gbk	4509796	4530287	20492	16	4509795	4530287	Bacteroides_fragilis_DCMOUH0017B_GCF_000710375.2__r1c4__ctg1_3899				N
Bacteroides_fragilis_DCMOUH0018B_GCF_000724665.2	Bacteroidetes	Bacteroidia	Bacteroidales	Bacteroidaceae	Bacteroides	r1c1	cyclic-lactone-autoinducer	NZ_CP036542.1.region001.gbk	2837825	2858316	20492	16	2837824	2858316	Bacteroides_fragilis_DCMOUH0018B_GCF_000724665.2__r1c1__ctg1_2376				N
Bacteroides_fragilis_DCMOUH0067B_GCF_000724805.2	Bacteroidetes	Bacteroidia	Bacteroidales	Bacteroidaceae	Bacteroides	r1c3	cyclic-lactone-autoinducer	NZ_CP036553.1.region003.gbk	4365262	4385753	20492	16	4365261	4385753	Bacteroides_fragilis_DCMOUH0067B_GCF_000724805.2__r1c3__ctg1_3670				N
Bacteroides_fragilis_DCMOUH0085B_GCF_000724815.2	Bacteroidetes	Bacteroidia	Bacteroidales	Bacteroidaceae	Bacteroides	r1c4	cyclic-lactone-autoinducer	NZ_CP037440.1.region004.gbk	4376743	4397234	20492	16	4376742	4397234	Bacteroides_fragilis_DCMOUH0085B_GCF_000724815.2__r1c4__ctg1_3651				N
Bacteroides_fragilis_DCMSKEJBY0001B_GCF_000710365.2	Bacteroidetes	Bacteroidia	Bacteroidales	Bacteroidaceae	Bacteroides	r1c3	cyclic-lactone-autoinducer	NZ_CP036546.1.region003.gbk	4343577	4364068	20492	16	4343576	4364068	Bacteroides_fragilis_DCMSKEJBY0001B_GCF_000710365.2__r1c3__ctg1_3673				N
Bacteroides_fragilis_DK1985_GCF_016864615.1	Bacteroidetes	Bacteroidia	Bacteroidales	Bacteroidaceae	Bacteroides	r1c4	cyclic-lactone-autoinducer	NZ_CP044428.1.region004.gbk	4363951	4384442	20492	16	4363950	4384442	Bacteroides_fragilis_DK1985_GCF_016864615.1__r1c4__ctg1_3733				N
Bacteroides_fragilis_FDAARGOS_1222_GCF_016888645.1	Bacteroidetes	Bacteroidia	Bacteroidales	Bacteroidaceae	Bacteroides	r9c3	cyclic-lactone-autoinducer	c00009_NZ_JAFE...region003.gbk	3069864	3090355	20492	16	3069863	3090355	Bacteroides_fragilis_FDAARGOS_1222_GCF_016888645.1__r9c3__ctg9_2711				N
Bacteroides_fragilis_FDAARGOS_763_GCF_013267555.1	Bacteroidetes	Bacteroidia	Bacteroidales	Bacteroidaceae	Bacteroides	r1c3	cyclic-lactone-autoinducer	NZ_CP054003.1.region003.gbk	5427253	5447744	20492	16	5427252	5447744	Bacteroides_fragilis_FDAARGOS_763_GCF_013267555.1__r1c3__ctg1_4623				N
Bacteroides_fragilis_HMW_610_GCF_000297695.1	Bacteroidetes	Bacteroidia	Bacteroidales	Bacteroidaceae	Bacteroides	r1c2	cyclic-lactone-autoinducer	NZ_JH815482.1.region002.gbk	1348025	1368516	20492	16	1348024	1368516	Bacteroides_fragilis_HMW_610_GCF_000297695.1__r1c2__ctg1_1251				N
Bacteroides_fragilis_HMW_616_GCF_000297755.1	Bacteroidetes	Bacteroidia	Bacteroidales	Bacteroidaceae	Bacteroides	r1c4	cyclic-lactone-autoinducer	NZ_JH815524.1.region004.gbk	2625225	2645716	20492	15	2625224	2645716	Bacteroides_fragilis_HMW_616_GCF_000297755.1__r1c4__ctg1_2285				N
Bacteroides_fragilis_MSK.10.5_GCF_019131915.1	Bacteroidetes	Bacteroidia	Bacteroidales	Bacteroidaceae	Bacteroides	r15c1	cyclic-lactone-autoinducer	c00015_NZ_JAHO...region001.gbk	80775	101266	20492	14	80774	101266	Bacteroides_fragilis_MSK.10.5_GCF_019131915.1__r15c1__ctg15_73				N
Bacteroides_fragilis_MSK.13.23_GCF_019131615.1	Bacteroidetes	Bacteroidia	Bacteroidales	Bacteroidaceae	Bacteroides	r11c2	cyclic-lactone-autoinducer	c00011_NZ_JAHO...region002.gbk	197148	217639	20492	16	197147	217639	Bacteroides_fragilis_MSK.13.23_GCF_019131615.1__r11c2__ctg11_200				N
Bacteroides_fragilis_NZ_8E3_BL_hyb_GCF_903181445.1	Bacteroidetes	Bacteroidia	Bacteroidales	Bacteroidaceae	Bacteroides	r11c2	cyclic-lactone-autoinducer	c00011_NZ_CAEU...region002.gbk	1301479	1321970	20492	16	1301478	1321970	Bacteroides_fragilis_NZ_8E3_BL_hyb_GCF_903181445.1__r11c2__ctg11_1209				N
Bacteroides_fragilis_O:21_GCF_001693695.1	Bacteroidetes	Bacteroidia	Bacteroidales	Bacteroidaceae	Bacteroides	r1c2	cyclic-lactone-autoinducer	NZ_KV751174.1.region002.gbk	573661	594152	20492	16	573660	594152	Bacteroides_fragilis_O:21_GCF_001693695.1__r1c2__ctg1_527				N
Bacteroides_fragilis_OM04-9BH_GCF_003439065.1	Bacteroidetes	Bacteroidia	Bacteroidales	Bacteroidaceae	Bacteroides	r8c1	cyclic-lactone-autoinducer	NZ_QSUS01000016.region001.gbk	29087	49578	20492	14	29086	49578	Bacteroides_fragilis_OM04-9BH_GCF_003439065.1__r8c1__ctg8_45				N
Bacteroides_fragilis_Q1F2_GCF_002849695.1	Bacteroidetes	Bacteroidia	Bacteroidales	Bacteroidaceae	Bacteroides	r1c3	cyclic-lactone-autoinducer	NZ_CP018937.1.region003.gbk	2572546	2593037	20492	16	2572545	2593037	Bacteroides_fragilis_Q1F2_GCF_002849695.1__r1c3__ctg1_2224				N
Bacteroides_sp._HF-4919_GCF_018860125.1	Bacteroidetes	Bacteroidia	Bacteroidales	Bacteroidaceae	Bacteroides	r1c2	cyclic-lactone-autoinducer	c00001_NZ_JAHK...region002.gbk	90099	110590	20492	15	90098	110590	Bacteroides_sp._HF-4919_GCF_018860125.1__r1c2__ctg1_97				N
Bacteroides_sp._NSJ-2_GCF_014288095.1	Bacteroidetes	Bacteroidia	Bacteroidales	Bacteroidaceae	Bacteroides	r2c2	cyclic-lactone-autoinducer	c00002_NZ_JACO...region002.gbk	188250	208741	20492	15	188249	208741	Bacteroides_sp._NSJ-2_GCF_014288095.1__r2c2__ctg2_181				N
Bacteroides_sp._PHL_2737_GCF_004115325.2	Bacteroidetes	Bacteroidia	Bacteroidales	Bacteroidaceae	Bacteroides	r1c3	cyclic-lactone-autoinducer	NZ_CP040630.1.region003.gbk	4428156	4448647	20492	17	4428155	4448647	Bacteroides_sp._PHL_2737_GCF_004115325.2__r1c3__ctg1_3776				N
Bacteroides_sp._UW_GCF_000785025.1	Bacteroidetes	Bacteroidia	Bacteroidales	Bacteroidaceae	Bacteroides	r66c1	cyclic-lactone-autoinducer	NZ_JANI01000068.region001.gbk	131092	151583	20492	14	131091	151583	Bacteroides_sp._UW_GCF_000785025.1__r66c1__ctg66_117				N
Bacteroides_sp._ZJ-18_GCF_011038705.2	Bacteroidetes	Bacteroidia	Bacteroidales	Bacteroidaceae	Bacteroides	r1c4	cyclic-lactone-autoinducer	NZ_CP072198.1.region004.gbk	3981957	4002448	20492	16	3981956	4002448	Bacteroides_sp._ZJ-18_GCF_011038705.2__r1c4__ctg1_3276				N
Bacteroides_sp._ZJ-21_GCF_011038695.1	Bacteroidetes	Bacteroidia	Bacteroidales	Bacteroidaceae	Bacteroides	r39c1	cyclic-lactone-autoinducer	c00039_NZ_JAAK...region001.gbk	150448	170939	20492	14	150447	170939	Bacteroides_sp._ZJ-21_GCF_011038695.1__r39c1__ctg39_137				N
Biomaibacter_acetigenes_SK-G1_GCF_003691585.1	Firmicutes	Clostridia	Thermosediminibacterales	Tepidanaerobacteraceae	Biomaibacter	r1c1	cyclic-lactone-autoinducer	NZ_CP033169.1.region001.gbk	217814	240084	22271	30	217813	240084	Biomaibacter_acetigenes_SK-G1_GCF_003691585.1__r1c1__ctg1_202	Biomaibacter_acetigenes_SK-G1_GCF_003691585.1__r1c1__ctg1_197		GCF_003691585.1/NZ_CP033169.1.region001_10 # 9247 # 9387 # 1 # ID=37_10;partial=00;start_type=ATG;rbs_motif=AGGAGG;rbs_spacer=5-10bp;gc_cont=0.397	Y
Biomaibacter_acetigenes_SK-G1_GCF_003691585.1	Firmicutes	Clostridia	Thermosediminibacterales	Tepidanaerobacteraceae	Biomaibacter	r1c2	cyclic-lactone-autoinducer	NZ_CP033169.1.region002.gbk	316921	336660	19740	23	316920	336660		Biomaibacter_acetigenes_SK-G1_GCF_003691585.1__r1c2__ctg1_312			Y
Biomaibacter_acetigenes_SK-G1_GCF_003691585.1	Firmicutes	Clostridia	Thermosediminibacterales	Tepidanaerobacteraceae	Biomaibacter	r1c3	cyclic-lactone-autoinducer	NZ_CP033169.1.region003.gbk	1153830	1172779	18950	20	1153829	1172779		Biomaibacter_acetigenes_SK-G1_GCF_003691585.1__r1c3__ctg1_1128			Y
Biomaibacter_acetigenes_SK-G1_GCF_003691585.1	Firmicutes	Clostridia	Thermosediminibacterales	Tepidanaerobacteraceae	Biomaibacter	r1c5	cyclic-lactone-autoinducer	NZ_CP033169.1.region005.gbk	2788971	2813216	24246	35	2788970	2813216	Biomaibacter_acetigenes_SK-G1_GCF_003691585.1__r1c5__ctg1_2934	Biomaibacter_acetigenes_SK-G1_GCF_003691585.1__r1c5__ctg1_2940			Y
Bittarella_massiliensis_BIOML-A1_GCF_009876955.1	Firmicutes	Clostridia	Eubacteriales	Oscillospiraceae	Bittarella	r4c1	cyclic-lactone-autoinducer	NZ_WWVY01000021.region001.gbk	1	13516	13516	19	0	13516	Bittarella_massiliensis_BIOML-A1_GCF_009876955.1__r4c1__ctg4_11				N
Bittarella_massiliensis_BIOML-A1_GCF_009876955.1	Firmicutes	Clostridia	Eubacteriales	Oscillospiraceae	Bittarella	r52c1	cyclic-lactone-autoinducer	NZ_WWVY01000002.region001.gbk	540907	561676	20770	18	540906	561676	Bittarella_massiliensis_BIOML-A1_GCF_009876955.1__r52c1__ctg52_509	Bittarella_massiliensis_BIOML-A1_GCF_009876955.1__r52c1__ctg52_508			Y
Bittarella_massiliensis_BIOML-A2_GCF_009876965.1	Firmicutes	Clostridia	Eubacteriales	Oscillospiraceae	Bittarella	r5c1	cyclic-lactone-autoinducer	NZ_WWVX01000001.region001.gbk	52660	73429	20770	18	52659	73429	Bittarella_massiliensis_BIOML-A2_GCF_009876965.1__r5c1__ctg5_60	Bittarella_massiliensis_BIOML-A2_GCF_009876965.1__r5c1__ctg5_61			Y
Bittarella_massiliensis_DSM_4029_GCF_900129515.1	Firmicutes	Clostridia	Eubacteriales	Oscillospiraceae	Bittarella	r4c2	cyclic-lactone-autoinducer	NZ_FQVY01000002.region002.gbk	865286	886055	20770	18	865285	886055	Bittarella_massiliensis_DSM_4029_GCF_900129515.1__r4c2__ctg4_822	Bittarella_massiliensis_DSM_4029_GCF_900129515.1__r4c2__ctg4_823			Y
Bittarella_massiliensis_GD6_GCF_001486165.1	Firmicutes	Clostridia	Eubacteriales	Oscillospiraceae	Bittarella	r8c1	cyclic-lactone-autoinducer	NZ_LN908977.1.region001.gbk	57818	78305	20488	19	57817	78305	Bittarella_massiliensis_GD6_GCF_001486165.1__r8c1__ctg8_71	Bittarella_massiliensis_GD6_GCF_001486165.1__r8c1__ctg8_72			Y
Bittarella_massiliensis_GGCC_0305_GCF_017566145.1	Firmicutes	Clostridia	Eubacteriales	Oscillospiraceae	Bittarella	r27c1	cyclic-lactone-autoinducer	c00027_NZ_JABF...region001.gbk	1	15907	15907	14	0	15907	Bittarella_massiliensis_GGCC_0305_GCF_017566145.1__r27c1__ctg27_5	Bittarella_massiliensis_GGCC_0305_GCF_017566145.1__r27c1__ctg27_6			Y
Bittarella_massiliensis_NSJ-19_GCF_014253005.1	Firmicutes	Clostridia	Eubacteriales	Oscillospiraceae	Bittarella	r1c1	cyclic-lactone-autoinducer	c00001_NZ_JACM...region001.gbk	92992	113767	20776	19	92991	113767	Bittarella_massiliensis_NSJ-19_GCF_014253005.1__r1c1__ctg1_100	Bittarella_massiliensis_NSJ-19_GCF_014253005.1__r1c1__ctg1_101			Y
Blautia_argi_KCTC_15426_GCF_003287895.1	Firmicutes	Clostridia	Eubacteriales	Lachnospiraceae	Blautia	r1c2	cyclic-lactone-autoinducer,lanthipeptide-class-ii	NZ_CP030280.1.region002.gbk	1553336	1588252	34917	36	1567569	1588252	Blautia_argi_KCTC_15426_GCF_003287895.1__r1c2__ctg1_1557	Blautia_argi_KCTC_15426_GCF_003287895.1__r1c2__ctg1_1558			Y
Blautia_caecimuris_MSK.19.25_GCF_013302405.1	Firmicutes	Clostridia	Eubacteriales	Lachnospiraceae	Blautia	r3c1	cyclic-lactone-autoinducer	c00003_NZ_JAAI...region001.gbk	12838	33419	20582	21	12837	33419	Blautia_caecimuris_MSK.19.25_GCF_013302405.1__r3c1__ctg3_28				N
Blautia_faecicola_KGMB01111_GCF_004123145.1	Firmicutes	Clostridia	Eubacteriales	Lachnospiraceae	Blautia	r1c1	cyclic-lactone-autoinducer	NZ_SDKC01000001.region001.gbk	205290	225036	19747	22	205289	225036	Blautia_faecicola_KGMB01111_GCF_004123145.1__r1c1__ctg1_153	Blautia_faecicola_KGMB01111_GCF_004123145.1__r1c1__ctg1_152		GCF_004123145.1/NZ_SDKC01000001.region001_11 # 9680 # 9829 # 1 # ID=4732_11;partial=00;start_type=ATG;rbs_motif=AGGAG;rbs_spacer=5-10bp;gc_cont=0.407	Y
Blautia_faecicola_KGMB01111_GCF_004123145.1	Firmicutes	Clostridia	Eubacteriales	Lachnospiraceae	Blautia	r1c3	cyclic-lactone-autoinducer	NZ_SDKC01000001.region003.gbk	3373061	3393495	20435	22	3373060	3393495	Blautia_faecicola_KGMB01111_GCF_004123145.1__r1c3__ctg1_2952			GCF_004123145.1/NZ_SDKC01000001.region003_13 # 10435 # 10563 # -1 # ID=4733_13;partial=00;start_type=ATG;rbs_motif=AGGAGG;rbs_spacer=5-10bp;gc_cont=0.302	Y
Blautia_faecis_3_YM_SP_D4_11.mj_GCF_014385375.1	Firmicutes	Clostridia	Eubacteriales	Lachnospiraceae	Blautia	r10c1	cyclic-lactone-autoinducer	c00010_NZ_JACR...region001.gbk	13396	33992	20597	24	13395	33992	Blautia_faecis_3_YM_SP_D4_11.mj_GCF_014385375.1__r10c1__ctg10_33			GCF_014385375.1/c00010_NZ_JACR...region001_14 # 9900 # 10004 # -1 # ID=4734_14;partial=00;start_type=ATG;rbs_motif=AGGAG;rbs_spacer=5-10bp;gc_cont=0.362	Y
Blautia_faecis_3_YM_SP_D4_11.mj_GCF_014385375.1	Firmicutes	Clostridia	Eubacteriales	Lachnospiraceae	Blautia	r1c1	RRE-containing,cyclic-lactone-autoinducer,lanthipeptide-class-ii	c00001_NZ_JACR...region001.gbk	479309	514905	35597	39	486525	507261	Blautia_faecis_3_YM_SP_D4_11.mj_GCF_014385375.1__r1c1__ctg1_460	Blautia_faecis_3_YM_SP_D4_11.mj_GCF_014385375.1__r1c1__ctg1_461			Y
Blautia_faecis_3_YM_SP_D4_11.mj_GCF_014385375.1	Firmicutes	Clostridia	Eubacteriales	Lachnospiraceae	Blautia	r3c1	cyclic-lactone-autoinducer,lanthipeptide-class-ii	c00003_NZ_JACR...region001.gbk	251691	280106	28416	31	251690	272161	Blautia_faecis_3_YM_SP_D4_11.mj_GCF_014385375.1__r3c1__ctg3_205				N
Blautia_faecis_DSM_27629_GCF_016908695.1	Firmicutes	Clostridia	Eubacteriales	Lachnospiraceae	Blautia	r12c1	NRPS,cyclic-lactone-autoinducer	c00012_NZ_JAFB...region001.gbk	15747	68257	52511	41	21877	42635	Blautia_faecis_DSM_27629_GCF_016908695.1__r12c1__ctg12_17	Blautia_faecis_DSM_27629_GCF_016908695.1__r12c1__ctg12_16		GCF_016908695.1/c00012_NZ_JAFB...region001_10 # 16132 # 16290 # 1 # ID=4736_10;partial=00;start_type=ATG;rbs_motif=AGGAGG;rbs_spacer=5-10bp;gc_cont=0.421	Y
Blautia_faecis_DSM_27629_GCF_016908695.1	Firmicutes	Clostridia	Eubacteriales	Lachnospiraceae	Blautia	r53c1	cyclic-lactone-autoinducer	c00053_NZ_JAFB...region001.gbk	1	4800	4800	8	0	4800	Blautia_faecis_DSM_27629_GCF_016908695.1__r53c1__ctg53_4				N
Blautia_faecis_MSK.14.13_GCF_013302375.1	Firmicutes	Clostridia	Eubacteriales	Lachnospiraceae	Blautia	r54c1	cyclic-lactone-autoinducer	c00054_NZ_JAAI...region001.gbk	231869	252595	20727	25	231868	252595	Blautia_faecis_MSK.14.13_GCF_013302375.1__r54c1__ctg54_203	Blautia_faecis_MSK.14.13_GCF_013302375.1__r54c1__ctg54_204		GCF_013302375.1/c00054_NZ_JAAI...region001_15 # 10578 # 10727 # -1 # ID=4737_15;partial=00;start_type=ATG;rbs_motif=AGGAG;rbs_spacer=5-10bp;gc_cont=0.340	Y
Blautia_faecis_MSK.17.74_GCF_013302345.1	Firmicutes	Clostridia	Eubacteriales	Lachnospiraceae	Blautia	r107c1	cyclic-lactone-autoinducer,lanthipeptide-class-ii	c00107_NZ_JAAI...region001.gbk	1	23608	23608	34	0	10867	Blautia_faecis_MSK.17.74_GCF_013302345.1__r107c1__ctg107_1	Blautia_faecis_MSK.17.74_GCF_013302345.1__r107c1__ctg107_2		GCF_013302345.1/c00107_NZ_JAAI...region001_2 # 718 # 867 # -1 # ID=4738_2;partial=00;start_type=ATG;rbs_motif=AGGAG;rbs_spacer=5-10bp;gc_cont=0.307	Y
Blautia_faecis_MSK.17.74_GCF_013302345.1	Firmicutes	Clostridia	Eubacteriales	Lachnospiraceae	Blautia	r119c1	cyclic-lactone-autoinducer	c00119_NZ_JAAI...region001.gbk	1	16107	16107	24	0	16107	Blautia_faecis_MSK.17.74_GCF_013302345.1__r119c1__ctg119_11	Blautia_faecis_MSK.17.74_GCF_013302345.1__r119c1__ctg119_10		GCF_013302345.1/c00119_NZ_JAAI...region001_10 # 8080 # 8229 # 1 # ID=4739_10;partial=00;start_type=ATG;rbs_motif=AGGAG;rbs_spacer=5-10bp;gc_cont=0.347	Y
Blautia_faecis_MSK.18.27_GCF_013304475.1	Firmicutes	Clostridia	Eubacteriales	Lachnospiraceae	Blautia	r77c1	NRPS,cyclic-lactone-autoinducer	c00077_NZ_JAAI...region001.gbk	1	50819	50819	31	23930	44530	Blautia_faecis_MSK.18.27_GCF_013304475.1__r77c1__ctg77_25			GCF_013304475.1/c00077_NZ_JAAI...region001_26 # 34530 # 34688 # -1 # ID=4740_26;partial=00;start_type=ATG;rbs_motif=AGGAGG;rbs_spacer=5-10bp;gc_cont=0.415	Y
Blautia_faecis_MSK.18.51_GCF_013300155.1	Firmicutes	Clostridia	Eubacteriales	Lachnospiraceae	Blautia	r10c1	NRPS,cyclic-lactone-autoinducer	c00010_NZ_JAAI...region001.gbk	52646	102659	50014	33	58776	79534	Blautia_faecis_MSK.18.51_GCF_013300155.1__r10c1__ctg10_64	Blautia_faecis_MSK.18.51_GCF_013300155.1__r10c1__ctg10_63		GCF_013300155.1/c00010_NZ_JAAI...region001_10 # 16132 # 16290 # 1 # ID=4793_10;partial=00;start_type=ATG;rbs_motif=AGGAGG;rbs_spacer=5-10bp;gc_cont=0.415	Y
Blautia_glucerasea_MSK.14.58_GCF_013305115.1	Firmicutes	Clostridia	Eubacteriales	Lachnospiraceae	Blautia	r49c1	NRPS,cyclic-lactone-autoinducer	c00049_NZ_JAAI...region001.gbk	1	30415	30415	25	15735	30415	Blautia_glucerasea_MSK.14.58_GCF_013305115.1__r49c1__ctg49_20	Blautia_glucerasea_MSK.14.58_GCF_013305115.1__r49c1__ctg49_21		GCF_013305115.1/c00049_NZ_JAAI...region001_21 # 26335 # 26493 # -1 # ID=4794_21;partial=00;start_type=ATG;rbs_motif=AGGAGG;rbs_spacer=5-10bp;gc_cont=0.415	Y
Blautia_glucerasea_MSK.20.42_GCF_013300845.1	Firmicutes	Clostridia	Eubacteriales	Lachnospiraceae	Blautia	r65c1	NRPS,cyclic-lactone-autoinducer	c00065_NZ_JAAI...region001.gbk	1	43295	43295	36	25962	43295	Blautia_glucerasea_MSK.20.42_GCF_013300845.1__r65c1__ctg65_29	Blautia_glucerasea_MSK.20.42_GCF_013300845.1__r65c1__ctg65_30		GCF_013300845.1/c00065_NZ_JAAI...region001_31 # 36562 # 36720 # -1 # ID=5352_31;partial=00;start_type=ATG;rbs_motif=AGGAGG;rbs_spacer=5-10bp;gc_cont=0.421	Y
Blautia_glucerasea_MSK.21.93_GCF_013304385.1	Firmicutes	Clostridia	Eubacteriales	Lachnospiraceae	Blautia	r37c1	cyclic-lactone-autoinducer	c00037_NZ_JAAI...region001.gbk	28289	49010	20722	20	28288	49010	Blautia_glucerasea_MSK.21.93_GCF_013304385.1__r37c1__ctg37_28	Blautia_glucerasea_MSK.21.93_GCF_013304385.1__r37c1__ctg37_27		GCF_013304385.1/c00037_NZ_JAAI...region001_7 # 10001 # 10150 # 1 # ID=9561_7;partial=00;start_type=ATG;rbs_motif=AGGAG;rbs_spacer=5-10bp;gc_cont=0.387	Y
Blautia_hansenii_1001175st1_E1_GCF_005844445.1	Firmicutes	Clostridia	Eubacteriales	Lachnospiraceae	Blautia	r10c1	cyclic-lactone-autoinducer	NZ_SPHE01000016.region001.gbk	1	17223	17223	19	0	17223	Blautia_hansenii_1001175st1_E1_GCF_005844445.1__r10c1__ctg10_9				N
Blautia_hansenii_1001175st1_E1_GCF_005844445.1	Firmicutes	Clostridia	Eubacteriales	Lachnospiraceae	Blautia	r8c1	cyclic-lactone-autoinducer	NZ_SPHE01000014.region001.gbk	64774	75854	11081	13	64773	75854	Blautia_hansenii_1001175st1_E1_GCF_005844445.1__r8c1__ctg8_77	Blautia_hansenii_1001175st1_E1_GCF_005844445.1__r8c1__ctg8_78		GCF_005844445.1/NZ_SPHE01000014.region001_12 # 10717 # 10866 # -1 # ID=9562_12;partial=00;start_type=ATG;rbs_motif=AGGAGG;rbs_spacer=5-10bp;gc_cont=0.347	Y
Blautia_luti_NZ_RSSSTS7063_SV_a2_mod_GCF_902167715.1	Firmicutes	Clostridia	Eubacteriales	Lachnospiraceae	Blautia	r29c1	cyclic-lactone-autoinducer	c00029_NZ_CABH...region001.gbk	27418	40510	13093	13	27417	40510	Blautia_luti_NZ_RSSSTS7063_SV_a2_mod_GCF_902167715.1__r29c1__ctg29_30	Blautia_luti_NZ_RSSSTS7063_SV_a2_mod_GCF_902167715.1__r29c1__ctg29_29		GCF_902167715.1/c00029_NZ_CABH...region001_10 # 10001 # 10150 # 1 # ID=9563_10;partial=00;start_type=ATG;rbs_motif=AGGAG;rbs_spacer=5-10bp;gc_cont=0.380	Y
Blautia_luti_SSTS_Bg7063_GCF_902167945.1	Firmicutes	Clostridia	Eubacteriales	Lachnospiraceae	Blautia	r156c1	cyclic-lactone-autoinducer	c00156_NZ_CABH...region001.gbk	1	13093	13093	15	0	13093	Blautia_luti_SSTS_Bg7063_GCF_902167945.1__r156c1__ctg156_5	Blautia_luti_SSTS_Bg7063_GCF_902167945.1__r156c1__ctg156_6		GCF_902167945.1/c00156_NZ_CABH...region001_6 # 2944 # 3093 # -1 # ID=10341_6;partial=00;start_type=ATG;rbs_motif=AGGAG;rbs_spacer=5-10bp;gc_cont=0.367	Y
Blautia_marasmi_Marseille-P2377_GCF_900258535.1	Firmicutes	Clostridia	Eubacteriales	Lachnospiraceae	Blautia	r5c1	cyclic-lactone-autoinducer	NZ_OIWX01000001.region001.gbk	866628	886780	20153	17	866627	886780		Blautia_marasmi_Marseille-P2377_GCF_900258535.1__r5c1__ctg5_753			Y
Blautia_marasmi_MGYG-HGUT-02437_GCF_902387025.1	Firmicutes	Clostridia	Eubacteriales	Lachnospiraceae	Blautia	r2c1	cyclic-lactone-autoinducer	c00002_NZ_CABM...region001.gbk	387243	410163	22921	14	387242	410163	Blautia_marasmi_MGYG-HGUT-02437_GCF_902387025.1__r2c1__ctg2_348	Blautia_marasmi_MGYG-HGUT-02437_GCF_902387025.1__r2c1__ctg2_345		GCF_902387025.1/c00002_NZ_CABM...region001_8 # 10001 # 10132 # 1 # ID=10342_8;partial=00;start_type=ATG;rbs_motif=AGGAGG;rbs_spacer=5-10bp;gc_cont=0.386	Y
Blautia_marasmi_MGYG-HGUT-02437_GCF_902387025.1	Firmicutes	Clostridia	Eubacteriales	Lachnospiraceae	Blautia	r7c1	cyclic-lactone-autoinducer	c00007_NZ_CABM...region001.gbk	343396	363971	20576	16	343395	363971	Blautia_marasmi_MGYG-HGUT-02437_GCF_902387025.1__r7c1__ctg7_293				N
Blautia_massiliensis_4_46_GCF_014269345.1	Firmicutes	Clostridia	Eubacteriales	Lachnospiraceae	Blautia	r1c1	NRPS,NRPS-like,cyclic-lactone-autoinducer	c00001_NZ_JACO...region001.gbk	239087	289411	50325	43	263845	284585	Blautia_massiliensis_4_46_GCF_014269345.1__r1c1__ctg1_263	Blautia_massiliensis_4_46_GCF_014269345.1__r1c1__ctg1_264		GCF_014269345.1/c00001_NZ_JACO...region001_36 # 35341 # 35499 # -1 # ID=10343_36;partial=00;start_type=ATG;rbs_motif=GGAGG;rbs_spacer=5-10bp;gc_cont=0.415	Y
Blautia_massiliensis_MSK.16.79_GCF_013305055.1	Firmicutes	Clostridia	Eubacteriales	Lachnospiraceae	Blautia	r2c1	RRE-containing,cyclic-lactone-autoinducer	c00002_NZ_JAAI...region001.gbk	11087	43400	32314	37	11086	31981	Blautia_massiliensis_MSK.16.79_GCF_013305055.1__r2c1__ctg2_30	Blautia_massiliensis_MSK.16.79_GCF_013305055.1__r2c1__ctg2_31		GCF_013305055.1/c00002_NZ_JAAI...region001_16 # 10593 # 10895 # -1 # ID=10344_16;partial=00;start_type=ATG;rbs_motif=GGA/GAG/AGG;rbs_spacer=11-12bp;gc_cont=0.327	Y
Blautia_obeum_1001271B_150615_E5_GCF_015668015.1	Firmicutes	Clostridia	Eubacteriales	Lachnospiraceae	Blautia	r12c1	cyclic-lactone-autoinducer	c00012_NZ_JADP...region001.gbk	1	10858	10858	12	0	10858	Blautia_obeum_1001271B_150615_E5_GCF_015668015.1__r12c1__ctg12_2	Blautia_obeum_1001271B_150615_E5_GCF_015668015.1__r12c1__ctg12_1		GCF_015668015.1/c00012_NZ_JADP...region001_1 # 116 # 265 # 1 # ID=10385_1;partial=00;start_type=ATG;rbs_motif=AGGAG;rbs_spacer=5-10bp;gc_cont=0.380	Y
Blautia_obeum_1001271B_150615_E5_GCF_015668015.1	Firmicutes	Clostridia	Eubacteriales	Lachnospiraceae	Blautia	r6c1	NRPS,RRE-containing,cyclic-lactone-autoinducer	c00006_NZ_JADP...region001.gbk	17009	83339	66331	52	23139	43897	Blautia_obeum_1001271B_150615_E5_GCF_015668015.1__r6c1__ctg6_18	Blautia_obeum_1001271B_150615_E5_GCF_015668015.1__r6c1__ctg6_17		GCF_015668015.1/c00006_NZ_JADP...region001_10 # 16132 # 16290 # 1 # ID=10386_10;partial=00;start_type=ATG;rbs_motif=AGGAGG;rbs_spacer=5-10bp;gc_cont=0.421	Y
Blautia_obeum_1001271st1_E5_GCF_005845175.1	Firmicutes	Clostridia	Eubacteriales	Lachnospiraceae	Blautia	r12c1	cyclic-lactone-autoinducer	NZ_SPFW01000020.region001.gbk	1	10858	10858	12	0	10858	Blautia_obeum_1001271st1_E5_GCF_005845175.1__r12c1__ctg12_2	Blautia_obeum_1001271st1_E5_GCF_005845175.1__r12c1__ctg12_1		GCF_005845175.1/NZ_SPFW01000020.region001_1 # 116 # 265 # 1 # ID=10387_1;partial=00;start_type=ATG;rbs_motif=AGGAG;rbs_spacer=5-10bp;gc_cont=0.380	Y
Blautia_obeum_1001271st1_E5_GCF_005845175.1	Firmicutes	Clostridia	Eubacteriales	Lachnospiraceae	Blautia	r6c1	NRPS,RRE-containing,cyclic-lactone-autoinducer	NZ_SPFW01000015.region001.gbk	17009	83339	66331	52	23139	43897	Blautia_obeum_1001271st1_E5_GCF_005845175.1__r6c1__ctg6_18	Blautia_obeum_1001271st1_E5_GCF_005845175.1__r6c1__ctg6_17		GCF_005845175.1/NZ_SPFW01000015.region001_10 # 16132 # 16290 # 1 # ID=10388_10;partial=00;start_type=ATG;rbs_motif=AGGAGG;rbs_spacer=5-10bp;gc_cont=0.421	Y
Blautia_obeum_2789STDY5834861_GCF_001405455.1	Firmicutes	Clostridia	Eubacteriales	Lachnospiraceae	Blautia	r2c2	NRPS,cyclic-lactone-autoinducer	NZ_CYZP01000002.region002.gbk	118436	170946	52511	35	124567	145310	Blautia_obeum_2789STDY5834861_GCF_001405455.1__r2c2__ctg2_103	Blautia_obeum_2789STDY5834861_GCF_001405455.1__r2c2__ctg2_102		GCF_001405455.1/NZ_CYZP01000002.region002_10 # 16133 # 16291 # 1 # ID=10389_10;partial=00;start_type=ATG;rbs_motif=AGGAGG;rbs_spacer=5-10bp;gc_cont=0.421	Y
Blautia_obeum_2789STDY5834861_GCF_001405455.1	Firmicutes	Clostridia	Eubacteriales	Lachnospiraceae	Blautia	r3c1	cyclic-lactone-autoinducer	NZ_CYZP01000003.region001.gbk	1	11381	11381	10	0	11381	Blautia_obeum_2789STDY5834861_GCF_001405455.1__r3c1__ctg3_3	Blautia_obeum_2789STDY5834861_GCF_001405455.1__r3c1__ctg3_2		GCF_001405455.1/NZ_CYZP01000003.region001_2 # 632 # 796 # 1 # ID=10390_2;partial=00;start_type=ATG;rbs_motif=GGAG/GAGG;rbs_spacer=5-10bp;gc_cont=0.321	Y
Blautia_obeum_2789STDY5834861_GCF_001405455.1	Firmicutes	Clostridia	Eubacteriales	Lachnospiraceae	Blautia	r5c1	cyclic-lactone-autoinducer	NZ_CYZP01000005.region001.gbk	136812	155784	18973	16	136811	155784	Blautia_obeum_2789STDY5834861_GCF_001405455.1__r5c1__ctg5_145	Blautia_obeum_2789STDY5834861_GCF_001405455.1__r5c1__ctg5_146		GCF_001405455.1/NZ_CYZP01000005.region001_10 # 10585 # 10734 # -1 # ID=10391_10;partial=00;start_type=ATG;rbs_motif=AGGAG;rbs_spacer=5-10bp;gc_cont=0.413	Y
Blautia_obeum_2789STDY5834921_GCF_001405215.1	Firmicutes	Clostridia	Eubacteriales	Lachnospiraceae	Blautia	r9c1	RRE-containing,cyclic-lactone-autoinducer,lanthipeptide-class-ii	NZ_CZBA01000009.region001.gbk	22430	92404	69975	86	29695	49027	Blautia_obeum_2789STDY5834921_GCF_001405215.1__r9c1__ctg9_44::Blautia_obeum_2789STDY5834921_GCF_001405215.1__r9c1__ctg9_75::Blautia_obeum_2789STDY5834921_GCF_001405215.1__r9c1__ctg9_98	Blautia_obeum_2789STDY5834921_GCF_001405215.1__r9c1__ctg9_45::Blautia_obeum_2789STDY5834921_GCF_001405215.1__r9c1__ctg9_76		GCF_001405215.1/NZ_CZBA01000009.region001_20 # 17174 # 17323 # -1 # ID=14401_20;partial=00;start_type=ATG;rbs_motif=AGGAG;rbs_spacer=5-10bp;gc_cont=0.307	Y
Blautia_obeum_2789STDY5834957_GCF_001404775.1	Firmicutes	Clostridia	Eubacteriales	Lachnospiraceae	Blautia	r38c1	cyclic-lactone-autoinducer	NZ_CZBP01000038.region001.gbk	1	18742	18742	16	0	18742	Blautia_obeum_2789STDY5834957_GCF_001404775.1__r38c1__ctg38_9	Blautia_obeum_2789STDY5834957_GCF_001404775.1__r38c1__ctg38_8		GCF_001404775.1/NZ_CZBP01000038.region001_8 # 8009 # 8158 # 1 # ID=14402_8;partial=00;start_type=ATG;rbs_motif=AGGAG;rbs_spacer=5-10bp;gc_cont=0.380	Y
Blautia_obeum_2789STDY5834957_GCF_001404775.1	Firmicutes	Clostridia	Eubacteriales	Lachnospiraceae	Blautia	r7c2	NRPS,cyclic-lactone-autoinducer	NZ_CZBP01000007.region002.gbk	75290	137286	61997	46	110397	131155	Blautia_obeum_2789STDY5834957_GCF_001404775.1__r7c2__ctg7_105	Blautia_obeum_2789STDY5834957_GCF_001404775.1__r7c2__ctg7_106		GCF_001404775.1/NZ_CZBP01000007.region002_38 # 45708 # 45866 # -1 # ID=14403_38;partial=00;start_type=ATG;rbs_motif=GGAGG;rbs_spacer=5-10bp;gc_cont=0.415	Y
Blautia_obeum_A2-162_GCF_000210015.1	Firmicutes	Clostridia	Eubacteriales	Lachnospiraceae	Blautia	r1c3	cyclic-lactone-autoinducer,lanthipeptide-class-i	NC_021022.1.region003.gbk	3672651	3705183	32533	41	3683955	3705183	Blautia_obeum_A2-162_GCF_000210015.1__r1c3__ctg1_3436	Blautia_obeum_A2-162_GCF_000210015.1__r1c3__ctg1_3435		GCF_000210015.1/NC_021022.1.region003_22 # 21306 # 21455 # 1 # ID=14404_22;partial=00;start_type=ATG;rbs_motif=AGGAG;rbs_spacer=5-10bp;gc_cont=0.380	Y
Blautia_obeum_AF14-23_GCF_003464645.1	Firmicutes	Clostridia	Eubacteriales	Lachnospiraceae	Blautia	r24c1	cyclic-lactone-autoinducer	NZ_QRZI01000030.region001.gbk	422	11277	10856	12	421	11277	Blautia_obeum_AF14-23_GCF_003464645.1__r24c1__ctg24_13	Blautia_obeum_AF14-23_GCF_003464645.1__r24c1__ctg24_14		GCF_003464645.1/NZ_QRZI01000030.region001_11 # 10594 # 10743 # -1 # ID=14405_11;partial=00;start_type=ATG;rbs_motif=AGGAG;rbs_spacer=5-10bp;gc_cont=0.380	Y
Blautia_obeum_AF14-23_GCF_003464645.1	Firmicutes	Clostridia	Eubacteriales	Lachnospiraceae	Blautia	r8c1	NRPS,cyclic-lactone-autoinducer	NZ_QRZI01000016.region001.gbk	16995	69024	52030	32	23282	43852	Blautia_obeum_AF14-23_GCF_003464645.1__r8c1__ctg8_17			GCF_003464645.1/NZ_QRZI01000016.region001_10 # 16131 # 16289 # 1 # ID=14406_10;partial=00;start_type=ATG;rbs_motif=GGAGG;rbs_spacer=5-10bp;gc_cont=0.415	Y
Blautia_obeum_AF14-52_GCF_003465235.1	Firmicutes	Clostridia	Eubacteriales	Lachnospiraceae	Blautia	r12c1	cyclic-lactone-autoinducer	NZ_QRYY01000002.region001.gbk	1	10856	10856	11	0	10856	Blautia_obeum_AF14-52_GCF_003465235.1__r12c1__ctg12_2	Blautia_obeum_AF14-52_GCF_003465235.1__r12c1__ctg12_1		GCF_003465235.1/NZ_QRYY01000002.region001_1 # 114 # 263 # 1 # ID=14431_1;partial=00;start_type=ATG;rbs_motif=AGGAG;rbs_spacer=5-10bp;gc_cont=0.380	Y
Blautia_obeum_AF14-52_GCF_003465235.1	Firmicutes	Clostridia	Eubacteriales	Lachnospiraceae	Blautia	r6c1	NRPS,cyclic-lactone-autoinducer	NZ_QRYY01000014.region001.gbk	25773	77802	52030	35	31902	52630	Blautia_obeum_AF14-52_GCF_003465235.1__r6c1__ctg6_29	Blautia_obeum_AF14-52_GCF_003465235.1__r6c1__ctg6_28		GCF_003465235.1/NZ_QRYY01000014.region001_10 # 16131 # 16289 # 1 # ID=14432_10;partial=00;start_type=ATG;rbs_motif=GGAGG;rbs_spacer=5-10bp;gc_cont=0.415	Y
Blautia_obeum_AF25-21_GCF_003459025.1	Firmicutes	Clostridia	Eubacteriales	Lachnospiraceae	Blautia	r12c1	cyclic-lactone-autoinducer	NZ_QRUH01000002.region001.gbk	31212	51361	20150	19	31211	51361		Blautia_obeum_AF25-21_GCF_003459025.1__r12c1__ctg12_38			Y
Blautia_obeum_AF25-21_GCF_003459025.1	Firmicutes	Clostridia	Eubacteriales	Lachnospiraceae	Blautia	r8c1	cyclic-lactone-autoinducer	NZ_QRUH01000016.region001.gbk	50325	63401	13077	20	50324	63401	Blautia_obeum_AF25-21_GCF_003459025.1__r8c1__ctg8_57	Blautia_obeum_AF25-21_GCF_003459025.1__r8c1__ctg8_58		GCF_003459025.1/NZ_QRUH01000016.region001_18 # 10593 # 10895 # -1 # ID=14496_18;partial=00;start_type=ATG;rbs_motif=GGA/GAG/AGG;rbs_spacer=11-12bp;gc_cont=0.327	Y
Blautia_obeum_AF29-2BH_GCF_003457595.1	Firmicutes	Clostridia	Eubacteriales	Lachnospiraceae	Blautia	r49c1	cyclic-lactone-autoinducer	NZ_QRSS01000006.region001.gbk	4613	24762	20150	19	4612	24762		Blautia_obeum_AF29-2BH_GCF_003457595.1__r49c1__ctg49_17			Y
Blautia_obeum_AF35-14AC_GCF_003475275.1	Firmicutes	Clostridia	Eubacteriales	Lachnospiraceae	Blautia	r12c1	cyclic-lactone-autoinducer	NZ_QRPQ01000002.region001.gbk	4607	24756	20150	19	4606	24756		Blautia_obeum_AF35-14AC_GCF_003475275.1__r12c1__ctg12_17			Y
Blautia_obeum_AF37-6AC_GCF_003474705.1	Firmicutes	Clostridia	Eubacteriales	Lachnospiraceae	Blautia	r33c1	cyclic-lactone-autoinducer	NZ_QROS01000004.region001.gbk	1	19878	19878	21	0	19878		Blautia_obeum_AF37-6AC_GCF_003474705.1__r33c1__ctg33_16			Y
Blautia_obeum_AF39-4_GCF_003474255.1	Firmicutes	Clostridia	Eubacteriales	Lachnospiraceae	Blautia	r1c1	cyclic-lactone-autoinducer	NZ_QROE01000001.region001.gbk	826423	846572	20150	19	826422	846572		Blautia_obeum_AF39-4_GCF_003474255.1__r1c1__ctg1_890			Y
Blautia_obeum_AM22-9LB_GCF_003471125.1	Firmicutes	Clostridia	Eubacteriales	Lachnospiraceae	Blautia	r17c1	cyclic-lactone-autoinducer	NZ_QRHZ01000024.region001.gbk	1	10976	10976	13	0	10976	Blautia_obeum_AM22-9LB_GCF_003471125.1__r17c1__ctg17_2	Blautia_obeum_AM22-9LB_GCF_003471125.1__r17c1__ctg17_1		GCF_003471125.1/NZ_QRHZ01000024.region001_1 # 234 # 383 # 1 # ID=14497_1;partial=00;start_type=ATG;rbs_motif=AGGAG;rbs_spacer=5-10bp;gc_cont=0.380	Y
Blautia_obeum_AM27-32LB_GCF_003469945.1	Firmicutes	Clostridia	Eubacteriales	Lachnospiraceae	Blautia	r31c1	cyclic-lactone-autoinducer	NZ_QSKO01000037.region001.gbk	1	12697	12697	22	0	12697	Blautia_obeum_AM27-32LB_GCF_003469945.1__r31c1__ctg31_5	Blautia_obeum_AM27-32LB_GCF_003469945.1__r31c1__ctg31_4		GCF_003469945.1/NZ_QSKO01000037.region001_3 # 1956 # 2105 # 1 # ID=14498_3;partial=00;start_type=ATG;rbs_motif=AGGAGG;rbs_spacer=5-10bp;gc_cont=0.380	Y
Blautia_obeum_AM27-32LB_GCF_003469945.1	Firmicutes	Clostridia	Eubacteriales	Lachnospiraceae	Blautia	r56c1	cyclic-lactone-autoinducer	NZ_QSKO01000006.region001.gbk	38358	59090	20733	23	38357	59090	Blautia_obeum_AM27-32LB_GCF_003469945.1__r56c1__ctg56_52	Blautia_obeum_AM27-32LB_GCF_003469945.1__r56c1__ctg56_51		GCF_003469945.1/NZ_QSKO01000006.region001_12 # 10001 # 10150 # 1 # ID=14499_12;partial=00;start_type=ATG;rbs_motif=AGGAG;rbs_spacer=5-10bp;gc_cont=0.380	Y
Blautia_obeum_AM29-25AC_GCF_003468995.1	Firmicutes	Clostridia	Eubacteriales	Lachnospiraceae	Blautia	r12c1	cyclic-lactone-autoinducer	NZ_QSJW01000002.region001.gbk	392554	412703	20150	19	392553	412703		Blautia_obeum_AM29-25AC_GCF_003468995.1__r12c1__ctg12_371			Y
Blautia_obeum_AM39-5AC_GCF_003467455.1	Firmicutes	Clostridia	Eubacteriales	Lachnospiraceae	Blautia	r1c1	cyclic-lactone-autoinducer	NZ_QSGT01000001.region001.gbk	489601	502134	12534	11	489600	502134		Blautia_obeum_AM39-5AC_GCF_003467455.1__r1c1__ctg1_467			Y
Blautia_obeum_AM43-41_GCF_003466965.1	Firmicutes	Clostridia	Eubacteriales	Lachnospiraceae	Blautia	r11c1	cyclic-lactone-autoinducer	NZ_QSFL01000019.region001.gbk	22564	42231	19668	20	22563	42231	Blautia_obeum_AM43-41_GCF_003466965.1__r11c1__ctg11_31	Blautia_obeum_AM43-41_GCF_003466965.1__r11c1__ctg11_30		GCF_003466965.1/NZ_QSFL01000019.region001_12 # 10001 # 10150 # 1 # ID=14506_12;partial=00;start_type=ATG;rbs_motif=AGGAG;rbs_spacer=5-10bp;gc_cont=0.333	Y
Blautia_obeum_AM54-7NE_GCF_003464105.1	Firmicutes	Clostridia	Eubacteriales	Lachnospiraceae	Blautia	r1c1	cyclic-lactone-autoinducer	NZ_QSDS01000001.region001.gbk	465930	481481	15552	14	465929	481481		Blautia_obeum_AM54-7NE_GCF_003464105.1__r1c1__ctg1_482			Y
Blautia_obeum_AM54-7NE_GCF_003464105.1	Firmicutes	Clostridia	Eubacteriales	Lachnospiraceae	Blautia	r33c1	cyclic-lactone-autoinducer,lanthipeptide-class-ii	NZ_QSDS01000039.region001.gbk	1	10285	10285	10	0	10285	Blautia_obeum_AM54-7NE_GCF_003464105.1__r33c1__ctg33_3	Blautia_obeum_AM54-7NE_GCF_003464105.1__r33c1__ctg33_4		GCF_003464105.1/NZ_QSDS01000039.region001_4 # 1666 # 1815 # -1 # ID=14507_4;partial=00;start_type=ATG;rbs_motif=AGGAG;rbs_spacer=5-10bp;gc_cont=0.380	Y
Blautia_obeum_APC942_31-1_GCF_003324155.1	Firmicutes	Clostridia	Eubacteriales	Lachnospiraceae	Blautia	r30c1	NRPS,cyclic-lactone-autoinducer	NZ_PSQG01000037.region001.gbk	1	20993	20993	15	0	17204	Blautia_obeum_APC942_31-1_GCF_003324155.1__r30c1__ctg30_7	Blautia_obeum_APC942_31-1_GCF_003324155.1__r30c1__ctg30_6		GCF_003324155.1/NZ_PSQG01000037.region001_6 # 6483 # 6638 # 1 # ID=14730_6;partial=00;start_type=ATG;rbs_motif=AGGAG;rbs_spacer=5-10bp;gc_cont=0.359	Y
Blautia_obeum_APC942_31-1_GCF_003324155.1	Firmicutes	Clostridia	Eubacteriales	Lachnospiraceae	Blautia	r39c1	cyclic-lactone-autoinducer	NZ_PSQG01000045.region001.gbk	11	12109	12099	17	10	12109	Blautia_obeum_APC942_31-1_GCF_003324155.1__r39c1__ctg39_16	Blautia_obeum_APC942_31-1_GCF_003324155.1__r39c1__ctg39_15		GCF_003324155.1/NZ_PSQG01000045.region001_15 # 10001 # 10177 # -1 # ID=14731_15;partial=00;start_type=ATG;rbs_motif=GGAG/GAGG;rbs_spacer=5-10bp;gc_cont=0.254	Y
Blautia_obeum_ATCC_29174_GCF_000153905.1	Firmicutes	Clostridia	Eubacteriales	Lachnospiraceae	Blautia	r50c1	cyclic-lactone-autoinducer,ranthipeptide	NZ_DS264289.1.region001.gbk	100869	133061	32193	34	112232	133061	Blautia_obeum_ATCC_29174_GCF_000153905.1__r50c1__ctg50_122	Blautia_obeum_ATCC_29174_GCF_000153905.1__r50c1__ctg50_121		GCF_000153905.1/NZ_DS264289.1.region001_21 # 21296 # 21601 # 1 # ID=18953_21;partial=00;start_type=ATG;rbs_motif=GGA/GAG/AGG;rbs_spacer=11-12bp;gc_cont=0.314	Y
Blautia_obeum_D31t1_170403_H11_GCF_015560005.1	Firmicutes	Clostridia	Eubacteriales	Lachnospiraceae	Blautia	r2c1	cyclic-lactone-autoinducer	c00002_NZ_JADM...region001.gbk	43000	63437	20438	23	42999	63437	Blautia_obeum_D31t1_170403_H11_GCF_015560005.1__r2c1__ctg2_66				N
Blautia_obeum_MGYG-HGUT-00212_GCF_902364415.1	Firmicutes	Clostridia	Eubacteriales	Lachnospiraceae	Blautia	r1c1	cyclic-lactone-autoinducer	c00001_NZ_CABJ...region001.gbk	826423	846572	20150	19	826422	846572		Blautia_obeum_MGYG-HGUT-00212_GCF_902364415.1__r1c1__ctg1_890			Y
Blautia_obeum_MSK.13.37_GCF_013302245.1	Firmicutes	Clostridia	Eubacteriales	Lachnospiraceae	Blautia	r12c1	cyclic-lactone-autoinducer	c00012_NZ_JAAI...region001.gbk	57613	73235	15623	13	57612	73235	Blautia_obeum_MSK.13.37_GCF_013302245.1__r12c1__ctg12_59	Blautia_obeum_MSK.13.37_GCF_013302245.1__r12c1__ctg12_58		GCF_013302245.1/c00012_NZ_JAAI...region001_10 # 9965 # 10159 # 1 # ID=19434_10;partial=00;start_type=ATG;rbs_motif=AGGA/GGAG/GAGG;rbs_spacer=11-12bp;gc_cont=0.333	Y
Blautia_obeum_MSK.13.37_GCF_013302245.1	Firmicutes	Clostridia	Eubacteriales	Lachnospiraceae	Blautia	r17c1	cyclic-lactone-autoinducer	c00017_NZ_JAAI...region001.gbk	8977	29564	20588	20	8976	29564	Blautia_obeum_MSK.13.37_GCF_013302245.1__r17c1__ctg17_19				N
Blautia_obeum_MSK.14.21_GCF_013302255.1	Firmicutes	Clostridia	Eubacteriales	Lachnospiraceae	Blautia	r45c1	cyclic-lactone-autoinducer	c00045_NZ_JAAI...region001.gbk	1	14700	14700	13	0	14700	Blautia_obeum_MSK.14.21_GCF_013302255.1__r45c1__ctg45_3	Blautia_obeum_MSK.14.21_GCF_013302255.1__r45c1__ctg45_4		GCF_013302255.1/c00045_NZ_JAAI...region001_5 # 4506 # 4700 # -1 # ID=19753_5;partial=00;start_type=ATG;rbs_motif=AGGA/GGAG/GAGG;rbs_spacer=11-12bp;gc_cont=0.333	Y
Blautia_obeum_MSK.18.40_GCF_013299585.1	Firmicutes	Clostridia	Eubacteriales	Lachnospiraceae	Blautia	r60c1	NRPS,cyclic-lactone-autoinducer	c00060_NZ_JAAI...region001.gbk	23919	79600	55682	49	30049	50807	Blautia_obeum_MSK.18.40_GCF_013299585.1__r60c1__ctg60_28	Blautia_obeum_MSK.18.40_GCF_013299585.1__r60c1__ctg60_27		GCF_013299585.1/c00060_NZ_JAAI...region001_17 # 16132 # 16290 # 1 # ID=20371_17;partial=00;start_type=ATG;rbs_motif=AGGAGG;rbs_spacer=5-10bp;gc_cont=0.415	Y
Blautia_obeum_MSK.18.40_GCF_013299585.1	Firmicutes	Clostridia	Eubacteriales	Lachnospiraceae	Blautia	r8c1	RRE-containing,cyclic-lactone-autoinducer,lanthipeptide-class-ii	c00008_NZ_JAAI...region001.gbk	26535	68780	42246	46	41188	61924	Blautia_obeum_MSK.18.40_GCF_013299585.1__r8c1__ctg8_56	Blautia_obeum_MSK.18.40_GCF_013299585.1__r8c1__ctg8_55	Blautia_obeum_MSK.18.40_GCF_013299585.1__r8c1__ctg8_34	GCF_013299585.1/c00008_NZ_JAAI...region001_28 # 24655 # 24804 # 1 # ID=20372_28;partial=00;start_type=ATG;rbs_motif=AGGAG;rbs_spacer=5-10bp;gc_cont=0.307	Y
Blautia_obeum_MSK.20.66_GCF_013302215.1	Firmicutes	Clostridia	Eubacteriales	Lachnospiraceae	Blautia	r74c1	cyclic-lactone-autoinducer	c00074_NZ_JAAI...region001.gbk	1	2243	2243	5	0	2243	Blautia_obeum_MSK.20.66_GCF_013302215.1__r74c1__ctg74_3	Blautia_obeum_MSK.20.66_GCF_013302215.1__r74c1__ctg74_2		GCF_013302215.1/c00074_NZ_JAAI...region001_2 # 443 # 592 # 1 # ID=20873_2;partial=00;start_type=ATG;rbs_motif=AGGAG;rbs_spacer=5-10bp;gc_cont=0.360	Y
Blautia_obeum_MSK.20.67_GCF_013302195.1	Firmicutes	Clostridia	Eubacteriales	Lachnospiraceae	Blautia	r69c1	cyclic-lactone-autoinducer	c00069_NZ_JAAI...region001.gbk	1	2242	2242	5	0	2242	Blautia_obeum_MSK.20.67_GCF_013302195.1__r69c1__ctg69_3	Blautia_obeum_MSK.20.67_GCF_013302195.1__r69c1__ctg69_2		GCF_013302195.1/c00069_NZ_JAAI...region001_2 # 442 # 591 # 1 # ID=20874_2;partial=00;start_type=ATG;rbs_motif=AGGAG;rbs_spacer=5-10bp;gc_cont=0.360	Y
Blautia_obeum_OM06-11AA_GCF_003438845.1	Firmicutes	Clostridia	Eubacteriales	Lachnospiraceae	Blautia	r1c1	RRE-containing,cyclic-lactone-autoinducer,lanthipeptide-class-ii	NZ_QSUB01000001.region001.gbk	607576	650153	42578	48	615471	634803	Blautia_obeum_OM06-11AA_GCF_003438845.1__r1c1__ctg1_599	Blautia_obeum_OM06-11AA_GCF_003438845.1__r1c1__ctg1_600		GCF_003438845.1/NZ_QSUB01000001.region001_19 # 17804 # 17953 # -1 # ID=22015_19;partial=00;start_type=ATG;rbs_motif=AGGAG;rbs_spacer=5-10bp;gc_cont=0.307	Y
Blautia_obeum_OM06-11AA_GCF_003438845.1	Firmicutes	Clostridia	Eubacteriales	Lachnospiraceae	Blautia	r1c2	cyclic-lactone-autoinducer	NZ_QSUB01000001.region002.gbk	655716	676312	20597	24	655715	676312	Blautia_obeum_OM06-11AA_GCF_003438845.1__r1c2__ctg1_649			GCF_003438845.1/NZ_QSUB01000001.region002_14 # 9900 # 10004 # -1 # ID=22016_14;partial=00;start_type=ATG;rbs_motif=AGGAG;rbs_spacer=5-10bp;gc_cont=0.362	Y
Blautia_obeum_TF09-10AC_GCF_003437665.1	Firmicutes	Clostridia	Eubacteriales	Lachnospiraceae	Blautia	r25c1	cyclic-lactone-autoinducer	NZ_QSRF01000031.region001.gbk	5452	16421	10970	13	5451	16421	Blautia_obeum_TF09-10AC_GCF_003437665.1__r25c1__ctg25_20	Blautia_obeum_TF09-10AC_GCF_003437665.1__r25c1__ctg25_21		GCF_003437665.1/NZ_QSRF01000031.region001_12 # 10594 # 10743 # -1 # ID=22033_12;partial=00;start_type=ATG;rbs_motif=AGGAG;rbs_spacer=5-10bp;gc_cont=0.380	Y
Blautia_obeum_TM09-13AC_GCF_003436075.1	Firmicutes	Clostridia	Eubacteriales	Lachnospiraceae	Blautia	r12c1	cyclic-lactone-autoinducer,lanthipeptide-class-i	NZ_QSOL01000002.region001.gbk	515072	539990	24919	26	515071	535813	Blautia_obeum_TM09-13AC_GCF_003436075.1__r12c1__ctg12_494	Blautia_obeum_TM09-13AC_GCF_003436075.1__r12c1__ctg12_495		GCF_003436075.1/NZ_QSOL01000002.region001_13 # 10593 # 10742 # -1 # ID=22526_13;partial=00;start_type=ATG;rbs_motif=AGGAGG;rbs_spacer=5-10bp;gc_cont=0.360	Y
Blautia_obeum_TM09-13AC_GCF_003436075.1	Firmicutes	Clostridia	Eubacteriales	Lachnospiraceae	Blautia	r9c1	cyclic-lactone-autoinducer	NZ_QSOL01000017.region001.gbk	1	19879	19879	18	0	19879	Blautia_obeum_TM09-13AC_GCF_003436075.1__r9c1__ctg9_8	Blautia_obeum_TM09-13AC_GCF_003436075.1__r9c1__ctg9_9		GCF_003436075.1/NZ_QSOL01000017.region001_10 # 9730 # 9879 # -1 # ID=22527_10;partial=00;start_type=ATG;rbs_motif=AGGAG;rbs_spacer=5-10bp;gc_cont=0.373	Y
Blautia_producta_ER3_GCF_000765245.1	Firmicutes	Clostridia	Eubacteriales	Lachnospiraceae	Blautia	r96c1	cyclic-lactone-autoinducer	NZ_JPJF01000045.region001.gbk	1	18862	18862	13	0	18862	Blautia_producta_ER3_GCF_000765245.1__r96c1__ctg96_2	Blautia_producta_ER3_GCF_000765245.1__r96c1__ctg96_3		GCF_000765245.1/NZ_JPJF01000045.region001_2 # 8716 # 8949 # -1 # ID=22942_2;partial=00;start_type=ATG;rbs_motif=None;rbs_spacer=None;gc_cont=0.393	Y
Blautia_producta_MGYG-HGUT-00123_GCF_902363525.1	Firmicutes	Clostridia	Eubacteriales	Lachnospiraceae	Blautia	r10c1	cyclic-lactone-autoinducer	c00010_NZ_CABJ...region001.gbk	138891	159605	20715	12	138890	159605	Blautia_producta_MGYG-HGUT-00123_GCF_902363525.1__r10c1__ctg10_130	Blautia_producta_MGYG-HGUT-00123_GCF_902363525.1__r10c1__ctg10_131		GCF_902363525.1/c00010_NZ_CABJ...region001_5 # 10569 # 10715 # -1 # ID=23405_5;partial=00;start_type=ATG;rbs_motif=GGAGG;rbs_spacer=5-10bp;gc_cont=0.435	Y
Blautia_producta_MSK.4.13_GCF_013302185.1	Firmicutes	Clostridia	Eubacteriales	Lachnospiraceae	Blautia	r33c1	cyclic-lactone-autoinducer,hglE-KS	c00033_NZ_JAAW...region001.gbk	1	30452	30452	30	9716	30452	Blautia_producta_MSK.4.13_GCF_013302185.1__r33c1__ctg33_19	Blautia_producta_MSK.4.13_GCF_013302185.1__r33c1__ctg33_18		GCF_013302185.1/c00033_NZ_JAAW...region001_17 # 19717 # 19866 # 1 # ID=24211_17;partial=00;start_type=ATG;rbs_motif=AGGAG;rbs_spacer=5-10bp;gc_cont=0.327	Y
Blautia_producta_MSK.4.13_GCF_013302185.1	Firmicutes	Clostridia	Eubacteriales	Lachnospiraceae	Blautia	r83c1	cyclic-lactone-autoinducer	c00083_NZ_JAAW...region001.gbk	1	17958	17958	19	0	17958	Blautia_producta_MSK.4.13_GCF_013302185.1__r83c1__ctg83_10	Blautia_producta_MSK.4.13_GCF_013302185.1__r83c1__ctg83_9		GCF_013302185.1/c00083_NZ_JAAW...region001_8 # 7217 # 7366 # 1 # ID=24212_8;partial=00;start_type=ATG;rbs_motif=AGGAG;rbs_spacer=5-10bp;gc_cont=0.360	Y
Blautia_producta_MSK.4.14_GCF_013304335.1	Firmicutes	Clostridia	Eubacteriales	Lachnospiraceae	Blautia	r33c1	cyclic-lactone-autoinducer,hglE-KS	c00033_NZ_JAAW...region001.gbk	1	30452	30452	30	9716	30452	Blautia_producta_MSK.4.14_GCF_013304335.1__r33c1__ctg33_19	Blautia_producta_MSK.4.14_GCF_013304335.1__r33c1__ctg33_18		GCF_013304335.1/c00033_NZ_JAAW...region001_17 # 19717 # 19866 # 1 # ID=24213_17;partial=00;start_type=ATG;rbs_motif=AGGAG;rbs_spacer=5-10bp;gc_cont=0.327	Y
Blautia_producta_MSK.4.14_GCF_013304335.1	Firmicutes	Clostridia	Eubacteriales	Lachnospiraceae	Blautia	r83c1	cyclic-lactone-autoinducer	c00083_NZ_JAAW...region001.gbk	1	17769	17769	18	0	17769	Blautia_producta_MSK.4.14_GCF_013304335.1__r83c1__ctg83_9	Blautia_producta_MSK.4.14_GCF_013304335.1__r83c1__ctg83_8		GCF_013304335.1/c00083_NZ_JAAW...region001_8 # 7028 # 7177 # 1 # ID=24214_8;partial=00;start_type=ATG;rbs_motif=AGGAG;rbs_spacer=5-10bp;gc_cont=0.360	Y
Blautia_producta_MSK.4.17_GCF_013302155.1	Firmicutes	Clostridia	Eubacteriales	Lachnospiraceae	Blautia	r34c1	cyclic-lactone-autoinducer,hglE-KS	c00034_NZ_JAAW...region001.gbk	1	30452	30452	30	9716	30452	Blautia_producta_MSK.4.17_GCF_013302155.1__r34c1__ctg34_19	Blautia_producta_MSK.4.17_GCF_013302155.1__r34c1__ctg34_18		GCF_013302155.1/c00034_NZ_JAAW...region001_17 # 19717 # 19866 # 1 # ID=24930_17;partial=00;start_type=ATG;rbs_motif=AGGAG;rbs_spacer=5-10bp;gc_cont=0.327	Y
Blautia_producta_MSK.4.17_GCF_013302155.1	Firmicutes	Clostridia	Eubacteriales	Lachnospiraceae	Blautia	r84c1	cyclic-lactone-autoinducer	c00084_NZ_JAAW...region001.gbk	1	17769	17769	18	0	17769	Blautia_producta_MSK.4.17_GCF_013302155.1__r84c1__ctg84_9	Blautia_producta_MSK.4.17_GCF_013302155.1__r84c1__ctg84_8		GCF_013302155.1/c00084_NZ_JAAW...region001_8 # 7028 # 7177 # 1 # ID=24931_8;partial=00;start_type=ATG;rbs_motif=AGGAG;rbs_spacer=5-10bp;gc_cont=0.360	Y
Blautia_producta_PMF1_GCF_004210255.1	Firmicutes	Clostridia	Eubacteriales	Lachnospiraceae	Blautia	r1c2	NRPS,cyclic-lactone-autoinducer	NZ_CP035945.1.region002.gbk	690322	742725	52404	46	716463	737178	Blautia_producta_PMF1_GCF_004210255.1__r1c2__ctg1_660	Blautia_producta_PMF1_GCF_004210255.1__r1c2__ctg1_661		GCF_004210255.1/NZ_CP035945.1.region002_26 # 36711 # 36857 # -1 # ID=25467_26;partial=00;start_type=ATG;rbs_motif=AGGAGG;rbs_spacer=5-10bp;gc_cont=0.388	Y
Blautia_pseudococcoides_SCSK_GCF_013112015.1	Firmicutes	Clostridia	Eubacteriales	Lachnospiraceae	Blautia	r1c1	cyclic-lactone-autoinducer,lanthipeptide-class-ii	NZ_CP053228.1.region001.gbk	605374	633269	27896	33	605373	625596	Blautia_pseudococcoides_SCSK_GCF_013112015.1__r1c1__ctg1_579	Blautia_pseudococcoides_SCSK_GCF_013112015.1__r1c1__ctg1_578		GCF_013112015.1/NZ_CP053228.1.region001_13 # 9953 # 10096 # -1 # ID=25966_13;partial=00;start_type=ATG;rbs_motif=GGAG/GAGG;rbs_spacer=5-10bp;gc_cont=0.340	Y
Blautia_pseudococcoides_SCSK_GCF_013112015.1	Firmicutes	Clostridia	Eubacteriales	Lachnospiraceae	Blautia	r1c3	cyclic-lactone-autoinducer,ranthipeptide	NZ_CP053228.1.region003.gbk	985102	1019749	34648	44	985101	1004463	Blautia_pseudococcoides_SCSK_GCF_013112015.1__r1c3__ctg1_936				N
Blautia_pseudococcoides_SCSK_GCF_013112015.1	Firmicutes	Clostridia	Eubacteriales	Lachnospiraceae	Blautia	r1c4	cyclic-lactone-autoinducer,lanthipeptide-class-i	NZ_CP053228.1.region004.gbk	1262585	1293252	30668	35	1272584	1293252	Blautia_pseudococcoides_SCSK_GCF_013112015.1__r1c4__ctg1_1234	Blautia_pseudococcoides_SCSK_GCF_013112015.1__r1c4__ctg1_1233		GCF_013112015.1/NZ_CP053228.1.region004_24 # 19910 # 20062 # 1 # ID=25967_24;partial=00;start_type=ATG;rbs_motif=GGAGG;rbs_spacer=5-10bp;gc_cont=0.359	Y
Blautia_pseudococcoides_SCSK_GCF_013112015.1	Firmicutes	Clostridia	Eubacteriales	Lachnospiraceae	Blautia	r1c7	cyclic-lactone-autoinducer	NZ_CP053228.1.region007.gbk	3562948	3583796	20849	20	3562947	3583796	Blautia_pseudococcoides_SCSK_GCF_013112015.1__r1c7__ctg1_3401	Blautia_pseudococcoides_SCSK_GCF_013112015.1__r1c7__ctg1_3400		GCF_013112015.1/NZ_CP053228.1.region007_9 # 10001 # 10135 # 1 # ID=25968_9;partial=00;start_type=ATG;rbs_motif=AGGAGG;rbs_spacer=5-10bp;gc_cont=0.400	Y
Blautia_pseudococcoides_YL58_GCF_001689125.2	Firmicutes	Clostridia	Eubacteriales	Lachnospiraceae	Blautia	r1c2	cyclic-lactone-autoinducer,lanthipeptide-class-i	NZ_CP015405.2.region002.gbk	1739279	1769432	30154	37	1739278	1759432	Blautia_pseudococcoides_YL58_GCF_001689125.2__r1c2__ctg1_1614	Blautia_pseudococcoides_YL58_GCF_001689125.2__r1c2__ctg1_1615		GCF_001689125.2/NZ_CP015405.2.region002_16 # 10093 # 10245 # -1 # ID=27094_16;partial=00;start_type=ATG;rbs_motif=GGAGG;rbs_spacer=5-10bp;gc_cont=0.353	Y
Blautia_pseudococcoides_YL58_GCF_001689125.2	Firmicutes	Clostridia	Eubacteriales	Lachnospiraceae	Blautia	r1c3	cyclic-lactone-autoinducer,ranthipeptide	NZ_CP015405.2.region003.gbk	2016774	2050924	34151	44	2031856	2050924	Blautia_pseudococcoides_YL58_GCF_001689125.2__r1c3__ctg1_1919				N
Blautia_pseudococcoides_YL58_GCF_001689125.2	Firmicutes	Clostridia	Eubacteriales	Lachnospiraceae	Blautia	r1c5	cyclic-lactone-autoinducer,lanthipeptide-class-ii	NZ_CP015405.2.region005.gbk	2386093	2413989	27897	32	2393755	2413989	Blautia_pseudococcoides_YL58_GCF_001689125.2__r1c5__ctg1_2262	Blautia_pseudococcoides_YL58_GCF_001689125.2__r1c5__ctg1_2263		GCF_001689125.2/NZ_CP015405.2.region005_17 # 17793 # 17936 # 1 # ID=27095_17;partial=00;start_type=ATG;rbs_motif=GGAG/GAGG;rbs_spacer=5-10bp;gc_cont=0.347	Y
Blautia_pseudococcoides_YL58_GCF_001689125.2	Firmicutes	Clostridia	Eubacteriales	Lachnospiraceae	Blautia	r1c6	cyclic-lactone-autoinducer	NZ_CP015405.2.region006.gbk	4661686	4682542	20857	20	4661685	4682542	Blautia_pseudococcoides_YL58_GCF_001689125.2__r1c6__ctg1_4316	Blautia_pseudococcoides_YL58_GCF_001689125.2__r1c6__ctg1_4317			Y
Blautia_pseudococcoides_YL58_GCF_002221555.2	Firmicutes	Clostridia	Eubacteriales	Lachnospiraceae	Blautia	r1c2	cyclic-lactone-autoinducer,lanthipeptide-class-i	NZ_CP022713.1.region002.gbk	1385707	1415860	30154	37	1385706	1405860	Blautia_pseudococcoides_YL58_GCF_002221555.2__r1c2__ctg1_1277	Blautia_pseudococcoides_YL58_GCF_002221555.2__r1c2__ctg1_1278		GCF_002221555.2/NZ_CP022713.1.region002_16 # 10093 # 10245 # -1 # ID=27097_16;partial=00;start_type=ATG;rbs_motif=GGAGG;rbs_spacer=5-10bp;gc_cont=0.353	Y
Blautia_pseudococcoides_YL58_GCF_002221555.2	Firmicutes	Clostridia	Eubacteriales	Lachnospiraceae	Blautia	r1c3	cyclic-lactone-autoinducer,ranthipeptide	NZ_CP022713.1.region003.gbk	1663202	1697352	34151	44	1678284	1697352	Blautia_pseudococcoides_YL58_GCF_002221555.2__r1c3__ctg1_1581				N
Blautia_pseudococcoides_YL58_GCF_002221555.2	Firmicutes	Clostridia	Eubacteriales	Lachnospiraceae	Blautia	r1c5	cyclic-lactone-autoinducer,lanthipeptide-class-ii	NZ_CP022713.1.region005.gbk	2032406	2060302	27897	32	2040068	2060302	Blautia_pseudococcoides_YL58_GCF_002221555.2__r1c5__ctg1_1924	Blautia_pseudococcoides_YL58_GCF_002221555.2__r1c5__ctg1_1925		GCF_002221555.2/NZ_CP022713.1.region005_17 # 17793 # 17936 # 1 # ID=27098_17;partial=00;start_type=ATG;rbs_motif=GGAG/GAGG;rbs_spacer=5-10bp;gc_cont=0.347	Y
Blautia_pseudococcoides_YL58_GCF_002221555.2	Firmicutes	Clostridia	Eubacteriales	Lachnospiraceae	Blautia	r1c6	cyclic-lactone-autoinducer	NZ_CP022713.1.region006.gbk	4307998	4328854	20857	20	4307997	4328854	Blautia_pseudococcoides_YL58_GCF_002221555.2__r1c6__ctg1_3976	Blautia_pseudococcoides_YL58_GCF_002221555.2__r1c6__ctg1_3977			Y
Blautia_pseudococcoides_YL58_GCF_016696745.1	Firmicutes	Clostridia	Eubacteriales	Lachnospiraceae	Blautia	r1c1	cyclic-lactone-autoinducer,lanthipeptide-class-i	NZ_CP065312.1.region001.gbk	52830	82983	30154	37	52829	72983	Blautia_pseudococcoides_YL58_GCF_016696745.1__r1c1__ctg1_53	Blautia_pseudococcoides_YL58_GCF_016696745.1__r1c1__ctg1_54		GCF_016696745.1/NZ_CP065312.1.region001_16 # 10093 # 10245 # -1 # ID=27558_16;partial=00;start_type=ATG;rbs_motif=GGAGG;rbs_spacer=5-10bp;gc_cont=0.353	Y
Blautia_pseudococcoides_YL58_GCF_016696745.1	Firmicutes	Clostridia	Eubacteriales	Lachnospiraceae	Blautia	r1c2	cyclic-lactone-autoinducer,ranthipeptide	NZ_CP065312.1.region002.gbk	330325	364475	34151	44	345407	364475	Blautia_pseudococcoides_YL58_GCF_016696745.1__r1c2__ctg1_359				N
Blautia_pseudococcoides_YL58_GCF_016696745.1	Firmicutes	Clostridia	Eubacteriales	Lachnospiraceae	Blautia	r1c4	cyclic-lactone-autoinducer,lanthipeptide-class-ii	NZ_CP065312.1.region004.gbk	699529	727425	27897	32	707191	727425	Blautia_pseudococcoides_YL58_GCF_016696745.1__r1c4__ctg1_702	Blautia_pseudococcoides_YL58_GCF_016696745.1__r1c4__ctg1_703		GCF_016696745.1/NZ_CP065312.1.region004_17 # 17793 # 17936 # 1 # ID=27559_17;partial=00;start_type=ATG;rbs_motif=GGAG/GAGG;rbs_spacer=5-10bp;gc_cont=0.347	Y
Blautia_pseudococcoides_YL58_GCF_016696745.1	Firmicutes	Clostridia	Eubacteriales	Lachnospiraceae	Blautia	r1c5	cyclic-lactone-autoinducer	NZ_CP065312.1.region005.gbk	2975121	2995977	20857	20	2975120	2995977	Blautia_pseudococcoides_YL58_GCF_016696745.1__r1c5__ctg1_2755	Blautia_pseudococcoides_YL58_GCF_016696745.1__r1c5__ctg1_2756			Y
Blautia_schinkii_MSK.6.16_GCF_013304845.1	Firmicutes	Clostridia	Eubacteriales	Lachnospiraceae	Blautia	r165c1	NRPS,cyclic-lactone-autoinducer	c00165_NZ_JAAW...region001.gbk	42156	97359	55204	42	48287	69030	Blautia_schinkii_MSK.6.16_GCF_013304845.1__r165c1__ctg165_51	Blautia_schinkii_MSK.6.16_GCF_013304845.1__r165c1__ctg165_50		GCF_013304845.1/c00165_NZ_JAAW...region001_10 # 16133 # 16291 # 1 # ID=27837_10;partial=00;start_type=ATG;rbs_motif=AGGAGG;rbs_spacer=5-10bp;gc_cont=0.421	Y
Blautia_schinkii_MSK.6.27_GCF_013304875.1	Firmicutes	Clostridia	Eubacteriales	Lachnospiraceae	Blautia	r9c1	NRPS,cyclic-lactone-autoinducer	c00009_NZ_JAAW...region001.gbk	42156	97359	55204	42	48287	69030	Blautia_schinkii_MSK.6.27_GCF_013304875.1__r9c1__ctg9_51	Blautia_schinkii_MSK.6.27_GCF_013304875.1__r9c1__ctg9_50		GCF_013304875.1/c00009_NZ_JAAW...region001_10 # 16133 # 16291 # 1 # ID=28342_10;partial=00;start_type=ATG;rbs_motif=AGGAGG;rbs_spacer=5-10bp;gc_cont=0.421	Y
Blautia_sp._2744_GCF_014297355.1	Firmicutes	Clostridia	Eubacteriales	Lachnospiraceae	Blautia	r1c1	NRPS,cyclic-lactone-autoinducer	c00001_NZ_JACO...region001.gbk	591583	634609	43027	36	597711	618451	Blautia_sp._2744_GCF_014297355.1__r1c1__ctg1_529	Blautia_sp._2744_GCF_014297355.1__r1c1__ctg1_528		GCF_014297355.1/c00001_NZ_JACO...region001_10 # 16130 # 16288 # 1 # ID=28768_10;partial=00;start_type=ATG;rbs_motif=GGAGG;rbs_spacer=5-10bp;gc_cont=0.415	Y
Blautia_sp._AF13-16_GCF_003479705.1	Firmicutes	Clostridia	Eubacteriales	Lachnospiraceae	Blautia	r60c1	cyclic-lactone-autoinducer	NZ_QUHN01000008.region001.gbk	116834	137403	20570	15	116833	137403	Blautia_sp._AF13-16_GCF_003479705.1__r60c1__ctg60_122				N
Blautia_sp._AF19-10LB_GCF_003461245.1	Firmicutes	Clostridia	Eubacteriales	Lachnospiraceae	Blautia	r3c1	cyclic-lactone-autoinducer	NZ_QTWS01000011.region001.gbk	86535	98154	11620	12	86534	98154	Blautia_sp._AF19-10LB_GCF_003461245.1__r3c1__ctg3_81	Blautia_sp._AF19-10LB_GCF_003461245.1__r3c1__ctg3_80		GCF_003461245.1/NZ_QTWS01000011.region001_12 # 9965 # 10159 # 1 # ID=29072_12;partial=00;start_type=ATG;rbs_motif=AGGA/GGAG/GAGG;rbs_spacer=11-12bp;gc_cont=0.333	Y
Blautia_sp._AF19-34_GCF_003479025.1	Firmicutes	Clostridia	Eubacteriales	Lachnospiraceae	Blautia	r7c1	cyclic-lactone-autoinducer	NZ_QUGJ01000015.region001.gbk	53855	80336	26482	30	53854	80336	Blautia_sp._AF19-34_GCF_003479025.1__r7c1__ctg7_71	Blautia_sp._AF19-34_GCF_003479025.1__r7c1__ctg7_80			Y
Blautia_sp._AF22-5LB_GCF_003478705.1	Firmicutes	Clostridia	Eubacteriales	Lachnospiraceae	Blautia	r40c1	cyclic-lactone-autoinducer	NZ_QUFX01000008.region001.gbk	19069	39799	20731	20	19068	39799	Blautia_sp._AF22-5LB_GCF_003478705.1__r40c1__ctg40_31	Blautia_sp._AF22-5LB_GCF_003478705.1__r40c1__ctg40_32		GCF_003478705.1/NZ_QUFX01000008.region001_11 # 10582 # 10731 # -1 # ID=30095_11;partial=00;start_type=ATG;rbs_motif=AGGAG;rbs_spacer=5-10bp;gc_cont=0.413	Y
Blautia_sp._AF26-2_GCF_003460955.1	Firmicutes	Clostridia	Eubacteriales	Lachnospiraceae	Blautia	r23c1	RRE-containing,cyclic-lactone-autoinducer	NZ_QTWD01000003.region001.gbk	103479	135537	32059	41	103478	124373	Blautia_sp._AF26-2_GCF_003460955.1__r23c1__ctg23_105	Blautia_sp._AF26-2_GCF_003460955.1__r23c1__ctg23_106		GCF_003460955.1/NZ_QTWD01000003.region001_18 # 10593 # 10895 # -1 # ID=30630_18;partial=00;start_type=ATG;rbs_motif=GGA/GAG/AGG;rbs_spacer=11-12bp;gc_cont=0.327	Y
Blautia_sp._AF32-4BH_GCF_003460565.1	Firmicutes	Clostridia	Eubacteriales	Lachnospiraceae	Blautia	r12c1	cyclic-lactone-autoinducer,lanthipeptide-class-ii	NZ_QTVL01000002.region001.gbk	266632	296597	29966	37	266631	287370	Blautia_sp._AF32-4BH_GCF_003460565.1__r12c1__ctg12_254	Blautia_sp._AF32-4BH_GCF_003460565.1__r12c1__ctg12_255		GCF_003460565.1/NZ_QTVL01000002.region001_17 # 10590 # 10739 # -1 # ID=31099_17;partial=00;start_type=ATG;rbs_motif=AGGAG;rbs_spacer=5-10bp;gc_cont=0.387	Y
[truncated: 39,506 more rows]

## Sheet: Supplementary Data 3
AgrB_ID	Amino acid sequence
[truncated: 40,850 more rows]

## Sheet: Supplementary Data 4
AgrD_ID	Amino acid sequence
[truncated: 34,625 more rows]

## Sheet: Supplementary Data 5
AgrD information					Genome information			BGC information
[truncated: 83,050 more rows]
